# Supplementary material for: Identification of cross-stage, cross-species malaria CD8+ T cell antigens
Source: Research Square preprint supplement (doi:10.21203/rs.3.rs-6682089/v1), 2025-05-30
Supplement: Supplementary file 1 [file 013e1cfe4edf8e71ffbcafc9.xlsx]

## Sheet: PVP01 - Liver
Analysis by PlasmoDB, based on RNAseq Transcriptomes				Genome-wide gene expression profiles throughout human malaria parasite		Unraveling the Plasmodium vivax sporozoite transcriptional journey from
				liver stage development in humanized mice, using the data avaiable in GEO GSE220039		mosquito vector to human host, using the data avaiable in GEO GSE117538
Input Ortholog(s)	Gene ID	Product Description	Ortholog count	Expression (TPM)	Liver Stage expression	Hypozoite (TPM)	Stage expression
PVX_000010	PVP01_0300700	Plasmodium exported protein, unknown function	7	5.67062	yes	0.155093	no
PVX_001780	PVP01_0603500	peptidase, putative	60	96.4674	yes	46.9363	yes
PVX_001810	PVP01_0604200	eukaryotic translation initiation factor subunit eIF2A, putative	53	60.5071	yes	9.23282	yes
PVX_001835	PVP01_0604600	60S ribosomal protein L30e, putative	60	223.321	yes	362.054	yes
PVX_001895	PVP01_0605900	N-acetyltransferase, GNAT family, putative	58	24.419	yes	6.82512	yes
PVX_001950	PVP01_0606900	VPS13 domain-containing protein, putative	20	105.919	yes	5.56793	yes
PVX_002590	PVP01_0405800	40S ribosomal protein S30, putative	47	46.2882	yes	2961.78	yes
PVX_002945	PVP01_0413200	tyrosine kinase-like protein, putative	50	32.5833	yes	57.2998	yes
PVX_003565	PVP01_0422600	early transcribed membrane protein	286	161.961	yes	2.98718	yes
PVX_003570	PVP01_0422500	nucleic acid-binding protein, putative	11	22.2943	yes	23.3739	yes
PVX_003695	PVP01_0419800	conserved Plasmodium protein, unknown function	12	1.51863	yes	0.256431	no
PVX_003810	PVP01_0416800	serine-repeat antigen 2 (SERA)	485	90.2683	yes	10.2025	yes
PVX_003905	PVP01_0415800	6-cysteine protein P230, putative	61	2.36403	yes	1.82237	yes
PVX_003955	PVP01_0414800	60S ribosomal protein L37ae, putative	61	211.296	yes	779.619	yes
PVX_077695	PVP01_0002210	PIR protein	16	0	no	0	no
PVX_080090	PVP01_1010700	heptatricopeptide repeat-containing protein, putative	60	58.0658	yes	109.669	yes
PVX_080270	PVP01_1014400	CCR4 domain-containing protein 1, putative	57	104.061	yes	13.7963	yes
PVX_080275	PVP01_1014500	40S ribosomal protein S24, putative	61	812.645	yes	867.846	yes
PVX_080405	PVP01_0933500	50S ribosomal protein L2, putative	122	73.514	yes	120.827	yes
PVX_080660	PVP01_1022500	RNA pseudouridylate synthase, putative	17	107.623	yes	12.3095	yes
PVX_081615	PVP01_0211900	seipin domain-containing protein, putative	45	9.02175	yes	48.1336	yes
PVX_082480	PVP01_0303600	Ran-binding protein, putative	435	21.9534	yes	43.7019	yes
PVX_082800	PVP01_1217300	zinc finger protein, putative	62	22.4837	yes	92.2382	yes
PVX_082840	PVP01_1216500	60S ribosomal protein L6, putative	61	803.256	yes	1310.55	yes
PVX_082965	PVP01_1213600	60S ribosomal protein L18a, putative	60	274.215	yes	898.81	yes
PVX_083000	PVP01_1212800	40S ribosomal protein S6, putative	60	191.421	yes	172.33	yes
PVX_083465	PVP01_1203300	60S ribosomal protein L17, putative	60	551.103	yes	1080.22	yes
PVX_083555	PVP01_1201700	membrane associated histidine-rich protein 2	15	1.43659	yes	0	no
PVX_083560	PVP01_1201600	Plasmodium exported protein, unknown function	41	0.496447	no	0	no
PVX_084160	PVP01_1301600	dynein heavy chain, putative	57	20.1601	yes	11.5378	yes
PVX_084310	PVP01_1304700	tetratricopeptide repeat protein, putative	61	258.096	yes	234.883	yes
PVX_084325	PVP01_1420500	female development protein FD3, putative	29	51.643	yes	76.6281	yes
PVX_084350	PVP01_1305400	conserved Plasmodium protein, unknown function	16	26.0751	yes	13.0251	yes
PVX_084795	PVP01_1314700	mitochondrial acidic protein MAM33, putative	61	202.381	yes	663.207	yes
PVX_084855	PVP01_1316000	DNA topoisomerase 2, putative	122	324.88	yes	21.8466	yes
PVX_084865
PVX_084955	PVP01_1317700	60S ribosomal protein L14, putative	61	56.2289	yes	549.336	yes
PVX_085030	PVP01_0112200	plasmepsin X, putative	123	168.39	yes	5.13246	yes
PVX_085270	PVP01_1324700	60S ribosomal protein L7-3, putative	61	263.829	yes	1305.57	yes
PVX_085275	PVP01_1324800	60S ribosomal protein L5, putative	60	498.738	yes	1186.68	yes
PVX_085310
PVX_085420	PVP01_1327700	40S ribosomal protein S25, putative	43	0.789201	no	1202.56	yes
PVX_085735	PVP01_1334600	60S ribosomal protein L10, putative	61	357.799	yes	2979.64	yes
PVX_085790	PVP01_1335700	conserved Plasmodium protein, unknown function	3	11.5056	yes	5.54644	yes
PVX_085800	PVP01_1335900	conserved Plasmodium protein, unknown function	12	1.1183	yes	2.75525	yes
PVX_085885	PVP01_1337600	DnaJ protein, putative	56	48.0937	yes	139.997	yes
PVX_085890	PVP01_1337700	rhomboid protease ROM8, putative	60	110.593	yes	111.948	yes
PVX_086020	PVP01_1340400	40S ribosomal protein S8e, putative	60	288.48	yes	767.318	yes
PVX_086120	PVP01_1342500	transcription elongation factor SPT6, putative	67	52.5737	yes	41.5704	yes
PVX_087745	PVP01_0104300	basal complex transmembrane protein 2, putative	4	149.071	yes	9.97384	yes
PVX_087860	PVP01_0106600	60S ribosomal protein L37, putative	58	2.50733	yes	1068.75	yes
PVX_087885	PVP01_0107500	rhoptry-associated membrane antigen, putative	32	743.573	yes	10.1787	yes
PVX_087950	PVP01_0108700	heat shock protein 90, putative	124	1773.14	yes	1307.98	yes
PVX_088065	PVP01_0111000	60S ribosomal protein L34, putative	61	151.472	yes	481.346	yes
PVX_089015	PVP01_0507400	ATP-dependent RNA helicase DBP10, putative	60	21.3476	yes	6.7941	yes
PVX_089055	PVP01_0508200	HECT-like E3 ubiquitin ligase, putative	64	213.135	yes	23.4118	yes
PVX_089280	PVP01_0512600	60S ribosomal protein L22, putative	60	186.296	yes	196.217	yes
PVX_089750	PVP01_0522400	60S ribosomal protein L15, putative	60	354.415	yes	1365.62	yes
PVX_090155	PVP01_0530800	alpha tubulin 2, putative	121	210.4	yes	220.062	yes
PVX_090160	PVP01_0530900	40S ribosomal protein S19, putative	60	232.904	yes	574.162	yes
PVX_090230	PVP01_0422600	early transcribed membrane protein	286	161.961	yes	2.98718	yes
PVX_090930	PVP01_0905800	histone H4, putative	57	6078.4	yes	22496	yes
PVX_091145	PVP01_0910700	60S ribosomal protein L36, putative	61	844.258	yes	372.42	yes
PVX_091485	PVP01_0917700	ubiquitin carboxyl-terminal hydrolase UCH54, putative	61	107.718	yes	75.2371	yes
PVX_091630
PVX_091635
PVX_091735	PVP01_0922900	conserved Plasmodium protein, unknown function	60	36.1594	yes	228.034	yes
PVX_091865	PVP01_0925600	60S ribosomal protein L35, putative	61	434.589	yes	308.344	yes
PVX_091925	PVP01_0926900	40S ribosomal protein S18, putative	60	341.172	yes	1341.18	yes
PVX_092120	PVP01_0930800	60S ribosomal protein P0, putative	61	1210.7	yes	2411.41	yes
PVX_092335	PVP01_0935300	alpha/beta hydrolase, putative	59	38.7599	yes	35.9558	yes
PVX_092730	PVP01_0943200	60S ribosomal protein L28, putative	62	257.074	yes	491.966	yes
PVX_092735	PVP01_0943300	60S ribosomal protein L35ae, putative	59	61.737	yes	611.479	yes
PVX_092820	PVP01_0945000	60S ribosomal protein L41, putative	46	481.208	yes	633.373	yes
PVX_092995	PVP01_0000100	tryptophan-rich antigen, tryptophan-rich protein	587	46.747	yes	0.257792	no
PVX_094275	PVP01_0801000	hypothetical protein	6	4.87415	yes	2.64267	yes
PVX_094305	PVP01_0935100	erythrocyte membrane and merozoite antigen EMMA1, putative	44	51.2974	yes	16.8872	yes
PVX_094400	PVP01_0803800	60S ribosomal protein L13, putative	61	501.26	yes	1210.76	yes
PVX_094600	PVP01_0807800	PHD finger protein PHD1, putative	38	173.394	yes	33.2987	yes
PVX_094635	PVP01_0808400	tubulin beta chain, putative	59	191.46	yes	897.64	yes
PVX_094675	PVP01_0809200	ribonuclease, putative	62	30.284	yes	35.2206	yes
PVX_094810	PVP01_0811900	PRE-binding protein, putative	60	588.904	yes	398.753	yes
PVX_095095	PVP01_0529400	zinc finger protein, putative	70	23.2132	yes	10.0189	yes
PVX_095190	PVP01_0819300	histone H2A.Z, putative	61	809.869	yes	1249.11	yes
PVX_095350	PVP01_0822500	40S ribosomal protein S11, putative	122	251.768	yes	1051.82	yes
PVX_096030	PVP01_0004275	hypothetical protein	4	3.13444	yes	0	no
PVX_096035
PVX_096265	PVP01_0317300	40S ribosomal protein S5, putative	61	87.2735	yes	1280.41	yes
PVX_097575
PVX_097760	PVP01_1030200	60S ribosomal protein L31, putative	61	602.121	yes	617.135	yes
PVX_097915	PVP01_1026900	60S ribosomal protein L4, putative	61	431.655	yes	441.238	yes
PVX_097940	PVP01_1026400	protein CAF40, putative	60	22.4878	yes	25.4875	yes
PVX_098060	PVP01_1024000	conserved Plasmodium protein, unknown function	44	2.42312	yes	18.9208	yes
PVX_098585	PVP01_0010770	reticulocyte binding protein 1a, putative	49	0	no	0	no
PVX_098640	PVP01_0702300	60S ribosomal protein L32, putative	61	87.2653	yes	701.59	yes
PVX_098700	PVP01_0703500	nucleoporin NUP221, putative	68	139.389	yes	129.04	yes
PVX_098705	PVP01_0703600	mitochondrial carrier protein, putative	61	57.6394	yes	63.6858	yes
PVX_098710	PVP01_0000320	PIR protein	379	0	no	0	no
PVX_098950	PVP01_0116000	conserved Plasmodium protein, unknown function	126	13.571	yes	3.9212	yes
PVX_099510	PVP01_0720400	conserved Plasmodium protein, unknown function	58	33.3481	yes	33.9525	yes
PVX_099525	PVP01_0720700	S-adenosylmethionine synthetase, putative	61	431.653	yes	432.128	yes
PVX_099530	PVP01_0720900	para-aminobenzoic acid synthetase, putative	56	14.2536	yes	13.9081	yes
PVX_099930	PVP01_0727900	high molecular weight rhoptry protein 2	67	298.35	yes	26.9545	yes
PVX_100005	PVP01_0729400	regulator of chromosome condensation, putative	46	130.984	yes	81.3672	yes
PVX_100625	PVP01_1451500	pentatricopeptide repeat domain-containing protein 2, putative	61	19.334	yes	5.94394	yes
PVX_101035	PVP01_1459800	40S ribosomal protein S17, putative	56	346.436	yes	518.2	yes
PVX_101200	PVP01_1336400	actin II	122	61.1147	yes	2009.5	yes
PVX_101400	PVP01_1467200	osmiophilic body protein G377, putative	58	9.4197	yes	7.5971	yes
PVX_101555	PVP01_0521700	conserved Plasmodium protein, unknown function	70	2.9131	yes	5.07519	yes
PVX_110835	PVP01_0623100	Plasmodium exported protein, unknown function	37	2.09289	yes	19.504	yes
PVX_110915	PVP01_0621300	conserved Plasmodium protein, unknown function	38	134.238	yes	113.144	yes
PVX_111290	PVP01_0613800	merozoite TRAP-like protein	42	464.153	yes	86.7228	yes
PVX_111330	PVP01_0612900	60S ribosomal protein L3, putative	60	357.78	yes	1615.56	yes
PVX_111355	PVP01_0612400	merozoite capping protein 1, putative	58	877.471	yes	464.946	yes
PVX_113265	PVP01_1146900	zinc finger protein, putative	63	51.651	yes	40.7541	yes
PVX_113295	PVP01_1146300	SAC3 domain-containing protein, putative	60	75.9908	yes	26.6636	yes
PVX_113665	PVP01_1131600	histone H3 variant, putative	121	854.769	yes	15697.8	yes
PVX_113780	PVP01_1136300	6-cysteine protein P12p, putative	59	72.7863	yes	67.263	yes
PVX_113850	PVP01_1134800	major facilitator superfamily-related transporter, putative	61	503.16	yes	19.6243	yes
PVX_113860	PVP01_1134600	60S ribosomal protein L19, putative	60	520.712	yes	513.946	yes
PVX_113995	PVP01_1132000	AP-2 complex subunit alpha, putative	62	22.3911	yes	5.9581	yes
PVX_114015	PVP01_1131700	histone H2A, putative	62	2254.41	yes	12784.1	yes
PVX_114040	PVP01_1131200	60S ribosomal protein L27a, putative	62	169.423	yes	650.513	yes
PVX_114370	PVP01_0421200	5'-3' exonuclease, putative	117	16.7359	yes	57.4665	yes
PVX_114480	PVP01_1122000	protein DJ-1, putative	61	352.053	yes	1211.12	yes
PVX_114515	PVP01_1121200	choline/ethanolaminephosphotransferase, putative	60	226.918	yes	216.271	yes
PVX_114830	PVP01_1114800	elongation factor 1-alpha, putative	115	448.091	yes	251.928	yes
PVX_114910	PVP01_1113100	40S ribosomal protein S15, putative	61	132.844	yes	862.629	yes
PVX_114990	PVP01_1111400	guanylyl cyclase beta, putative	56	5.51209	yes	10.1102	yes
PVX_115255	PVP01_1106100	ubiquitin-60S ribosomal protein L40, putative	62	254.709	yes	29394	yes
PVX_115275	PVP01_1105700	conserved Plasmodium protein, unknown function	51	92.4448	yes	11.5199	yes
PVX_115460	PVP01_1101500	Plasmodium exported protein, unknown function	13	24.5804	yes	0.40572	no
PVX_116655	PVP01_1230300	conserved Plasmodium protein, unknown function	64	88.6482	yes	7.41252	yes
PVX_116700	PVP01_1231200	60S ribosomal protein L23, putative	60	269.525	yes	511.793	yes
PVX_116715	PVP01_1231500	60S ribosomal protein L6, putative	60	183.891	yes	602.335	yes
PVX_116915	PVP01_1235700	exported protein 2, putative	61	429.62	yes	316.539	yes
PVX_117060	PVP01_1238700	MORC family protein, putative	61	168.591	yes	27.3272	yes
PVX_117135	PVP01_1240200	enkurin domain-containing protein, putative	63	1.01026	yes	0	no
PVX_117390	PVP01_1245500	40S ribosomal protein S28e, putative	61	287.006	yes	1809.17	yes
PVX_117420	PVP01_1246100	60S ribosomal protein L27, putative	60	183.911	yes	1196.66	yes
PVX_117440	PVP01_1246500	60S ribosomal protein L29, putative	58	117.578	yes	441.482	yes
PVX_117570	PVP01_1249000	conserved Plasmodium protein, unknown function	34	65.7115	yes	49.1005	yes
PVX_117685	PVP01_1251300	ferlin, putative	59	24.2997	yes	5.84702	yes
PVX_118145	PVP01_1260000	40S ribosomal protein S5, putative	60	487.637	yes	810.427	yes
PVX_118230	PVP01_1261800	ATP-dependent RNA helicase MAK5, putative	63	70.5106	yes	71.0239	yes
PVX_118340	PVP01_1264000	serine/threonine protein kinase, putative	53	18.5544	yes	37.5607	yes
PVX_118345	PVP01_1264100	Sec7 domain-containing protein ARFGEF, putative	38	102.926	yes	88.3881	yes
PVX_118625	PVP01_1269800	trailer hitch homolog, putative	60	136.457	yes	158.952	yes
PVX_118695
PVX_119225	PVP01_0838200	Plasmodium exported protein (PHIST), unknown function	7	55.1519	yes	0.36154	no
PVX_119250	PVP01_0837700	serine/threonine protein kinase, putative	63	134.609	yes	268.354	yes
PVX_119345	PVP01_0835800	60S ribosomal protein L44, putative	62	68.2913	yes	1374.85	yes
PVX_119470	PVP01_0833200	40S ribosomal protein S23, putative	61	103.568	yes	646.824	yes
PVX_119765	PVP01_0826800	conserved Plasmodium protein, unknown function	55	7.03256	yes	10.5704	yes
PVX_121965	PVP01_0810300	DNA2/NAM7 helicase, putative	125	47.2348	yes	21.0786	yes
PVX_122030	PVP01_1404700	conserved Plasmodium protein, unknown function	43	148.341	yes	43.5384	yes
PVX_122285	PVP01_1410100	60S ribosomal protein L24, putative	60	143.49	yes	637.823	yes
PVX_122465	PVP01_1413700	protein AAP2, putative	26	57.181	yes	16.6951	yes
PVX_123060	PVP01_1426100	DNA/RNA-binding protein Alba 1, putative	60	665.968	yes	2220.04	yes
PVX_123070	PVP01_1426300	60S ribosomal protein L13-2, putative	63	492.916	yes	892.962	yes
PVX_123075	PVP01_1426400	40S ribosomal protein S16, putative	61	131.653	yes	871.394	yes
PVX_123800	PVP01_1441600	phospholipid-transporting ATPase, putative	65	224.419	yes	58.8259	yes
PVX_123805	PVP01_1441700	conserved Plasmodium protein, unknown function	32	60.8762	yes	10.1352	yes
PVX_123845	PVP01_1442500	polyadenylate-binding protein 1, putative	62	315.879	yes	137.066	yes
PVX_124080	PVP01_1447200	conserved Plasmodium protein, unknown function	64	13.9238	yes	9.04736	yes
PVX_169270
Blue	no ortholog	8
Overall expression					153/166		146/166

## Sheet: P. vivax - all stages
Analysis based on the study: Unraveling the Plasmodium vivax sporozoite transcriptional journey from mosquito vector to human host, using the data avaiable in GEO GSE117538
Gene ID	Product Description	Blood Stage	expression (TPM)		Sporozoite (TPM)	expression
PVX_000010	Plasmodium exported protein, unknown function	11080.5	yes		0	no
PVX_001780	hypothetical protein, conserved	134.092	yes		18.4935	yes
PVX_001810	hypothetical protein, conserved	92.978	yes		0	no
PVX_001835	60S ribosomal protein L30, putative	1948.76	yes		0	no
PVX_001895	histone acetyltransferase, putative	111.139	yes		24.4714	yes
PVX_001950	hypothetical protein, conserved	93.5009	yes		1.27988	yes
PVX_002590	40S ribosomal protein S30, putative	2946.25	yes		11.7041	yes
PVX_002945	tyrosine kinase-like protein, putative	55.7814	yes		53.9227	yes
PVX_003565	early transcribed membrane protein (ETRAMP)	28993.6	yes		0	no
PVX_003570	hypothetical protein, conserved	41.4191	yes		10.1567	yes
PVX_003695	hypothetical protein, conserved	442.36	yes		112.573	yes
PVX_003810	serine-repeat antigen 5 (SERA), putative	1316.06	yes		0	no
PVX_003905	6-cysteine protein	397.76	yes		0.318327	no
PVX_003955	60S ribosomal protein L37a, putative	3404.83	yes		0	no
PVX_077695	unspecified product	249.289	yes		0	no
PVX_080090	hypothetical protein, conserved	410.707	yes		58.2105	yes
PVX_080270	hypothetical protein, conserved	203.803	yes		3.30309	yes
PVX_080275	40S ribosomal protein S24, putative	2088.57	yes		0	no
PVX_080405	60S ribosomal protein L2, putative	1617.26	yes		32.5217	yes
PVX_080660	RNA pseudouridylate synthase, putative	163.516	yes		22.5808	yes
PVX_081615	hypothetical protein, conserved	57.9215	yes		23.0525	yes
PVX_082480	hypothetical protein, conserved	295.262	yes		46.3736	yes
PVX_082800	hypothetical protein, conserved	113.805	yes		0	no
PVX_082840	60S ribosomal protein L6, putative	1439.09	yes		35.7901	yes
PVX_082965	60S ribosomal protein L18a, putative	1413.24	yes		18.3155	yes
PVX_083000	40S ribosomal protein S6, putative	1577.1	yes		77.9797	yes
PVX_083465	60S ribosomal protein L17, putative	1859.45	yes		23.5033	yes
PVX_083555	hypothetical protein	2874.81	yes		0	no
PVX_083560	Plasmodium exported protein, unknown function	3708.15	yes		0	no
PVX_084160	dynein heavy chain, putative	327.594	yes		16.6934	yes
PVX_084310	hypothetical protein, conserved	1232.55	yes		0	no
PVX_084325	high mobility group protein B3, putative	161.705	yes		31.5473	yes
PVX_084350	hypothetical protein, conserved	72.4279	yes		280.906	yes
PVX_084795	mitochondrial acidic protein MAM33, putative	464.011	yes		0	no
PVX_084855	DNA topoisomerase II, putative	327.74	yes		1.6125	yes
PVX_084865	hypothetical protein, conserved	162.644	yes		9.96705	yes
PVX_084955	60S ribosomal protein L14, putative	2014.26	yes		14.0977	yes
PVX_085030	aspartyl protease, putative	67.204	yes		0.6907	no
PVX_085270	ribosomal protein L7A, putative	1961.82	yes		74.4561	yes
PVX_085275	60S ribosomal protein L5, putative	2265.71	yes		35.9464	yes
PVX_085310	hypothetical protein, conserved	66.4822	yes		9.20341	yes
PVX_085420	40S ribosomal protein S25, putative	2384.46	yes		75.9795	yes
PVX_085735	60S ribosomal protein L10, putative	1352.21	yes		28.3015	yes
PVX_085790	Sperm-specific protein Don juan, putative	333.245	yes		26.0328	yes
PVX_085800	hypothetical protein	333.245	yes		26.0328	yes
PVX_085885	hypothetical protein, conserved	73.6458	yes		0	no
PVX_085890	rhomboid protease ROM8, putative	114.012	yes		7.04244	yes
PVX_086020	40S ribosomal protein S8e, putative	2161.8	yes		16.7553	yes
PVX_086120	hypothetical protein, conserved	101.802	yes		113.164	yes
PVX_087745	hypothetical protein, conserved	190.749	yes		12.7085	yes
PVX_087860	60S ribosomal protein L37, putative	1245.82	yes		113.811	yes
PVX_087885	rhoptry-associated membrane antigen, putative	64.9193	yes		0.413403	no
PVX_087950	heat shock protein 86, putative	2904.95	yes		2740.2	yes
PVX_088065	60S ribosomal protein L34, putative	2001.97	yes		9.81309	yes
PVX_089015	ATP-dependent RNA helicase DBP10, putative	63.5461	yes		10.043	yes
PVX_089055	E3 ubiquitin-protein ligase, putative	163.239	yes		3.37482	yes
PVX_089280	60S ribosomal protein L22, putative	1588.49	yes		6.0102	yes
PVX_089750	60S ribosomal protein L15-1, putative	1587.96	yes		21.3289	yes
PVX_090155	tubulin alpha chain, putative	1500.52	yes		0	no
PVX_090160	40S ribosomal protein S19, putative	2277.66	yes		33.9014	yes
PVX_090230	early transcribed membrane protein (ETRAMP)	13469.7	yes		44.199	yes
PVX_090930	histone H4, putative	37735.9	yes		161.789	yes
PVX_091145	60S ribosomal protein L36, putative	2060.32	yes		0	no
PVX_091485	ubiquitin C-terminal hydrolase, family 1, putative	201.169	yes		0	no
PVX_091630	hypothetical protein, conserved	150.818	yes		73.7347	yes
PVX_091635	hypothetical protein, conserved	240.642	yes		164.88	yes
PVX_091735	hypothetical protein, conserved	96.9744	yes		30.2706	yes
PVX_091865	60S ribosomal protein L35, putative	2893.94	yes		30.0691	yes
PVX_091925	40S ribosomal protein S18, putative	2053.57	yes		626.894	yes
PVX_092120	60S acidic ribosomal protein P0, putative	1309.29	yes		62.6109	yes
PVX_092335	hypothetical protein, conserved	136.973	yes		17.9036	yes
PVX_092730	60S ribosomal protein L28, putative	1612.53	yes		0	no
PVX_092735	60S ribosomal protein L35ae, putative	2357.06	yes		49.1478	yes
PVX_092820	60S ribosomal protein L41, putative	6036.05	yes		233.603	yes
PVX_092995	tryptophan-rich antigen (Pv-fam-a)	430.781	yes		0	no
PVX_094275	hypothetical protein	1575.71	yes		0	no
PVX_094305	tryptophan-rich antigen	484.998	yes		0	no
PVX_094400	60S ribosomal protein L13a, putative	1664.09	yes		13.4627	yes
PVX_094600	hypothetical protein, conserved	164.832	yes		44.2433	yes
PVX_094635	tubulin beta chain, putative	2405.27	yes		267.01	yes
PVX_094675	hypothetical protein, conserved	118.249	yes		0	no
PVX_094810	PRE-binding protein, putative	749.228	yes		16.1115	yes
PVX_095095	hypothetical protein, conserved	2082.13	yes		0	no
PVX_095190	histone H2A, putative	3779.97	yes		158.988	yes
PVX_095350	40S ribosomal protein S11, putative	2401.19	yes		7.7583	yes
PVX_096030	hypothetical protein	1475.35	yes		0	no
PVX_096035	hypothetical protein	287.806	yes		0	no
PVX_096265	40S ribosomal protein S5, putative	1432.84	yes		12.9314	yes
PVX_097575	tryptophan-rich antigen (Pv-fam-a)	422.015	yes		0	no
PVX_097760	60S ribosomal protein L31, putative	2696.14	yes		33.6139	yes
PVX_097915	60S ribosomal protein L4, putative	1439.74	yes		14.2868	yes
PVX_097940	cell differentiation protein rcd1, putative	78.688	yes		0	no
PVX_098060	hypothetical protein, conserved	85.68	yes		13.2413	yes
PVX_098585	reticulocyte binding protein 1a	70.9254	yes		0	no
PVX_098640	60S ribosomal protein L32, putative	1590.67	yes		5.29004	yes
PVX_098700	nucleoporin NUP100/NSP100, putative	151.755	yes		326.322	yes
PVX_098705	mitochondrial carrier protein, putative	61.0842	yes		226.524	yes
PVX_098710	dynein heavy chain, putative	61.0842	yes		226.524	yes
PVX_098950	hypothetical protein, conserved	173.189	yes		34.2157	yes
PVX_099510	50S ribosomal protein L29, putative	161.67	yes		2.65465	yes
PVX_099525	S-adenosylmethionine synthetase, putative	1191.2	yes		623.224	yes
PVX_099530	para-aminobenzoic acid synthetase, putative	643.132	yes		6.16864	yes
PVX_099930	high molecular weight rhoptry protein 2	2304.72	yes		0	no
PVX_100005	hypothetical protein, conserved	72.7291	yes		9.65496	yes
PVX_100625	hypothetical protein, conserved	198.673	yes		7.32523	yes
PVX_101035	40S ribosomal protein S17, putative	2481.68	yes		12.3322	yes
PVX_101200	actin	3605.95	yes		3820.61	yes
PVX_101400	osmiophilic body protein, putative	1467.98	yes		4.32637	yes
PVX_101555	hypothetical protein	502.782	yes		0	no
PVX_110835	Plasmodium exported protein, unknown function	3292.8	yes		0	no
PVX_110915	hypothetical protein, conserved	316.881	yes		80.0654	yes
PVX_111290	merozoite TRAP-like protein, putative	464.042	yes		178.285	yes
PVX_111330	60S ribosomal protein L3, putative	1414.17	yes		37.8509	yes
PVX_111355	merozoite capping protein 1, putative	2845.02	yes		575.675	yes
PVX_113265	hypothetical protein, conserved	155.486	yes		17.0178	yes
PVX_113295	hypothetical protein, conserved	95.8075	yes		12.7402	yes
PVX_113665	histone H3, putative	24088.6	yes		19.2375	yes
PVX_113780	6-cysteine protein	695.286	yes		3.15153	yes
PVX_113850	transporter, putative	253.259	yes		11.0845	yes
PVX_113860	60S ribosomal protein L19, putative	2100.43	yes		0	no
PVX_113995	AP-2 complex subunit alpha, putative	52.033	yes		1.1861	yes
PVX_114015	histone H2A, putative	13492.4	yes		201.779	yes
PVX_114040	60S ribosomal protein L27a, putative	2301.58	yes		6.3871	yes
PVX_114370	DNA polymerase 1, putative	202.226	yes		133.656	yes
PVX_114480	protein DJ-1, putative	1186.94	yes		6.96575	yes
PVX_114515	ethanolaminephosphotransferase, putative	942.521	yes		9.23668	yes
PVX_114830	elongation factor 1-alpha, putative	608.212	yes		50.3247	yes
PVX_114910	40S ribosomal protein S15, putative	1511.12	yes		5.81915	yes
PVX_114990	guanylyl cyclase, putative	59.2922	yes		25.599	yes
PVX_115255	ubiquitin-60S ribosomal protein L40, putative	1660.71	yes		93.4618	yes
PVX_115275	hypothetical protein, conserved	72.6295	yes		11.887	yes
PVX_115460	Plasmodium exported protein, unknown function	397.225	yes		0	no
PVX_116655	hypothetical protein, conserved	545.138	yes		0	no
PVX_116700	60S ribosomal protein L23, putative	2189.18	yes		0	no
PVX_116715	60S ribosomal protein L9, putative	1127.12	yes		22.9016	yes
PVX_116915	exported protein 2, putative	962.025	yes		25.0498	yes
PVX_117060	hypothetical protein, conserved	209.825	yes		89.4911	yes
PVX_117135	hypothetical protein, conserved	191.803	yes		0	no
PVX_117390	40S ribosomal protein S28e, putative	2726.8	yes		655.54	yes
PVX_117420	60S ribosomal protein L27, putative	2307.32	yes		4.23699	yes
PVX_117440	60S ribosomal protein L29, putative	3564.53	yes		155.166	yes
PVX_117570	hypothetical protein, conserved	129.972	yes		8.78351	yes
PVX_117685	ferlin, putative	80.183	yes		472.889	yes
PVX_118145	40S ribosomal protein S5, putative	2034.42	yes		11.3891	yes
PVX_118230	RNA helicase, putative	74.5826	yes		197.401	yes
PVX_118340	serine/threonine protein kinase, putative	163.605	yes		35.133	yes
PVX_118345	protein transport protein SEC7, putative	82.3719	yes		0.449989	no
PVX_118625	trailer hitch homolog, putative	260.595	yes		42.3049	yes
PVX_118695	Pv-fam-d protein	1106.31	yes		0	no
PVX_119225	Plasmodium exported protein, unknown function	481.253	yes		2.22646	yes
PVX_119250	serine/threonine protein kinase, putative	353.544	yes		351.232	yes
PVX_119345	60S ribosomal protein L44, putative	2394.74	yes		104.204	yes
PVX_119470	40S ribosomal protein S23, putative	2854.48	yes		27.9098	yes
PVX_119765	hypothetical protein, conserved	140.425	yes		25.8498	yes
PVX_121965	hypothetical protein, conserved	65.8847	yes		11.494	yes
PVX_122030	hypothetical protein, conserved	119.531	yes		1.37364	yes
PVX_122285	60S ribosomal protein L24, putative	2735.27	yes		27.0211	yes
PVX_122465	hypothetical protein, conserved	142.783	yes		6.11901	yes
PVX_123060	DNA/RNA-binding protein Alba 1, putative	489.945	yes		358.697	yes
PVX_123070	60S ribosomal protein L13, putative	1584.72	yes		9.7435	yes
PVX_123075	40S ribosomal protein S16, putative	1608.06	yes		2.86525	yes
PVX_123800	phospholipid-transporting ATPase, putative	240.041	yes		350.599	yes
PVX_123805	hypothetical protein, conserved	240.041	yes		350.599	yes
PVX_123845	polyadenylate-binding protein, putative	615.961	yes		18.0286	yes
PVX_124080	hypothetical protein, conserved	230.237	yes		4.31226	yes
PVX_169270	unspecified product	355.62	yes		41.6266	yes
Overall expression			166/166			125/166

## Sheet: PF3D7 - Liver
Analysis based on the study: Genome-wide gene expression profiles throughout human malaria parasite liver stage development in humanized mice, using the data avaiable in GEO GSE220039
Input Ortholog(s)	Gene ID	Product Description	Ortholog count	Day 2 (TPM)	Liver Stage expression	Day 4 (TPM)	Liver Stage expression	Day 5 (TPM)	Liver Stage expression	Day 6 (TPM)	Liver Stage expression
PVX_001780	PF3D7_1018300	peptidase, putative	60	81.3153	yes	70.4844	yes	81.2773	yes	63.2405	yes
PVX_001810	PF3D7_1019000	eukaryotic translation initiation factor subunit eIF2A, putative	53	0	no	127.585	yes	102.117	yes	131.309	yes
PVX_001835	PF3D7_1019400	60S ribosomal protein L30e, putative	60	456.564	yes	745.121	yes	846.539	yes	1003.7	yes
PVX_001895	PF3D7_1020700	N-acetyltransferase, GNAT family, putative	58	0	no	92.2088	yes	110.591	yes	96.3301	yes
PVX_001950	PF3D7_1021700	VPS13 domain-containing protein, putative	20	0	no	61.1339	yes	25.9008	yes	31.5817	yes
PVX_002590	PF3D7_0219200	40S ribosomal protein S30	47	292.808	yes	1091.51	yes	676.747	yes	905.841	yes
PVX_002945	PF3D7_0211700	tyrosine kinase-like protein, putative	50	0	no	81.5728	yes	135.849	yes	123.152	yes
PVX_003565	PF3D7_0202500	early transcribed membrane protein 2	282	37.9859	yes	77.6408	yes	33.4228	yes	17.2508	yes
PVX_003570
PVX_003695
PVX_003810	PF3D7_0207300	serine repeat antigen 8	488	0	no	305.781	yes	15.6817	yes	6.06989	yes
PVX_003905	PF3D7_0209000	6-cysteine protein P230	61	6.6333	yes	0	no	1.85382	yes	0.479118	no
PVX_003955	PF3D7_0210100	60S ribosomal protein L37ae, putative	61	0	no	1006.73	yes	585.732	yes	850.705	yes
PVX_077695
PVX_080090	PF3D7_0523200	heptatricopeptide repeat-containing protein, putative	60	0	no	39.8905	yes	25.7198	yes	27.043	yes
PVX_080270	PF3D7_0519500	CCR4 domain-containing protein 1, putative	57	51.062	yes	63.3405	yes	56.976	yes	67.146	yes
PVX_080275	PF3D7_0519400	40S ribosomal protein S24	61	758.78	yes	2366.78	yes	2002.61	yes	2114.31	yes
PVX_080405	PF3D7_0516900	60S ribosomal protein L2	122	1816.36	yes	4066.35	yes	4397.35	yes	2970.31	yes
PVX_080660	PF3D7_0511500	RNA pseudouridylate synthase, putative	17	13.2384	yes	70.8299	yes	48.9973	yes	91.9058	yes
PVX_081615	PF3D7_0102800	seipin domain-containing protein, putative	45	141.157	yes	27.9305	yes	47.5263	yes	64.4156	yes
PVX_082480	PF3D7_1434500	dynein-related AAA-type ATPase, putative	451	0	no	32.9724	yes	35.0072	yes	47.9211	yes
PVX_082800	PF3D7_1337400	zinc finger protein, putative	62	28.1759	yes	152.878	yes	244.308	yes	278.273	yes
PVX_082840	PF3D7_1338200	60S ribosomal protein L6, putative	61	121.978	yes	562.543	yes	671.685	yes	676.574	yes
PVX_082965	PF3D7_1341200	60S ribosomal protein L18, putative	60	366.091	yes	121.71	yes	145.662	yes	194.574	yes
PVX_083000	PF3D7_1342000	40S ribosomal protein S6	60	370.088	yes	1261.17	yes	1422.07	yes	1326.89	yes
PVX_083465	PF3D7_1351400	60S ribosomal protein L17, putative	60	551.766	yes	988.23	yes	874.733	yes	1071.2	yes
PVX_083555
PVX_083560	PF3D7_1353100	Plasmodium exported protein, unknown function	41	0	no	20.7732	yes	11.8163	yes	9.21161	yes
PVX_084160	PF3D7_1202300	dynein heavy chain, putative	57	0	no	2.78343	yes	4.4332	yes	6.91602	yes
PVX_084310	PF3D7_1205600	tetratricopeptide repeat protein, putative	61	1425.7	yes	510.888	yes	795.684	yes	702.652	yes
PVX_084325
PVX_084350	PF3D7_1206300	conserved Plasmodium protein, unknown function	16	89.5382	yes	32.9383	yes	20.6306	yes	35.1597	yes
PVX_084795	PF3D7_1434800	mitochondrial acidic protein MAM33, putative	61	325.224	yes	1360.12	yes	1644.66	yes	956.091	yes
PVX_084855	PF3D7_1239500	DNA gyrase subunit B	122	0	no	46.5302	yes	67.1507	yes	85.0598	yes
PVX_084865
PVX_084955	PF3D7_1431700	60S ribosomal protein L14, putative	61	822.012	yes	1925.84	yes	1117.2	yes	1299.01	yes
PVX_085030	PF3D7_0808200	plasmepsin X	123	0	no	0	no	2.71012	yes	0.845272	no
PVX_085270	PF3D7_1424400	60S ribosomal protein L7-3, putative	61	518.995	yes	685.472	yes	977.278	yes	938.011	yes
PVX_085275	PF3D7_1424100	60S ribosomal protein L5, putative	60	378.255	yes	1886.46	yes	2057.3	yes	1589.71	yes
PVX_085310
PVX_085420	PF3D7_1421200	40S ribosomal protein S25	43	54.6754	yes	298.946	yes	186.069	yes	234.065	yes
PVX_085735	PF3D7_1414300	60S ribosomal protein L10, putative	61	0	no	1936.4	yes	2417.41	yes	2206.32	yes
PVX_085790
PVX_085800
PVX_085885	PF3D7_1411300	DnaJ protein, putative	56	0	no	43.6475	yes	153.09	yes	171.299	yes
PVX_085890	PF3D7_1411200	rhomboid protease ROM8	60	0	no	30.8197	yes	41.6241	yes	45.9956	yes
PVX_086020	PF3D7_1408600	40S ribosomal protein S8e, putative	60	2596.37	yes	1689.63	yes	2723.97	yes	2661.24	yes
PVX_086120	PF3D7_1406200	transcription elongation factor SPT6, putative	67	0	no	179.659	yes	95.5232	yes	138.199	yes
PVX_087745
PVX_087860	PF3D7_0706400	60S ribosomal protein L37	58	73.4044	yes	476.731	yes	363.447	yes	402.722	yes
PVX_087885	PF3D7_0707300	rhoptry-associated membrane antigen	32	0	no	3.83546	yes	2.85735	yes	2.62327	yes
PVX_087950	PF3D7_0708400	heat shock protein 90	124	2522.66	yes	4783.66	yes	7723.9	yes	4759.86	yes
PVX_088065	PF3D7_0710600	60S ribosomal protein L34	61	155.487	yes	970.712	yes	1107.35	yes	1127.73	yes
PVX_089015	PF3D7_0827000	ATP-dependent RNA helicase DBP10, putative	60	49.4796	yes	139.242	yes	140.505	yes	152.516	yes
PVX_089055	PF3D7_0826100	HECT-like E3 ubiquitin ligase, putative	64	10.2678	yes	134.944	yes	123.271	yes	147.228	yes
PVX_089280	PF3D7_0821700	60S ribosomal protein L22, putative	60	331.849	yes	829.383	yes	763.852	yes	832.759	yes
PVX_089750	PF3D7_0415900	60S ribosomal protein L15, putative	60	1298.09	yes	1850.97	yes	1861.84	yes	1711.66	yes
PVX_090155	PF3D7_0422300	alpha tubulin 2	121	0	no	102.217	yes	411.62	yes	156.64	yes
PVX_090160	PF3D7_0422400	40S ribosomal protein S19	60	36.0742	yes	222.92	yes	363.871	yes	467.293	yes
PVX_090230	PF3D7_0202500	early transcribed membrane protein 2	282	37.9859	yes	77.6408	yes	33.4228	yes	17.2508	yes
PVX_090930	PF3D7_1105000	histone H4	57	1968.29	yes	2382.46	yes	2243.36	yes	3307.07	yes
PVX_091145	PF3D7_1109900	60S ribosomal protein L36	61	1005.09	yes	436.329	yes	467.876	yes	605.42	yes
PVX_091485	PF3D7_1117100	ubiquitin carboxyl-terminal hydrolase UCH54	61	0	no	431.655	yes	263.492	yes	338.282	yes
PVX_091630
PVX_091635
PVX_091735	PF3D7_1122300	conserved Plasmodium protein, unknown function	60	0	no	9.47438	yes	29.6123	yes	31.2938	yes
PVX_091865	PF3D7_1124900	60S ribosomal protein L35, putative	61	389.562	yes	493.126	yes	451.473	yes	647.654	yes
PVX_091925	PF3D7_1126200	40S ribosomal protein S18, putative	60	144.515	yes	113.235	yes	156.561	yes	162.675	yes
PVX_092120	PF3D7_1130200	60S ribosomal protein P0	61	306.799	yes	3260.91	yes	3855.01	yes	3411.91	yes
PVX_092335	PF3D7_1134500	alpha/beta hydrolase, putative	59	0	no	29.4301	yes	50.9767	yes	78.1927	yes
PVX_092730	PF3D7_1142500	60S ribosomal protein L28	62	72.4035	yes	331.471	yes	388.622	yes	576.161	yes
PVX_092735	PF3D7_1142600	60S ribosomal protein L35ae, putative	59	577.542	yes	805.54	yes	441.986	yes	467.884	yes
PVX_092820	PF3D7_1144300	60S ribosomal protein L41	46	35902.6	yes	2011.48	yes	219.803	yes	282.357	yes
PVX_092995	PF3D7_0102700	merozoite-associated tryptophan-rich antigen	619	0	no	0	no	10.5637	yes	9.45185	yes
PVX_094275
PVX_094305	PF3D7_0611800	conserved Plasmodium protein, unknown function	44	107.365	yes	202.303	yes	282.557	yes	292.416	yes
PVX_094400	PF3D7_1004000	60S ribosomal protein L13, putative	61	407.559	yes	1751.67	yes	1499.69	yes	1653.74	yes
PVX_094600	PF3D7_1008100	PHD finger protein PHD1	38	0	no	65.451	yes	45.4161	yes	79.2854	yes
PVX_094635	PF3D7_1008700	tubulin beta chain	59	862.369	yes	2519.86	yes	2040.92	yes	1324.72	yes
PVX_094675	PF3D7_1009200	ribonuclease, putative	62	0	no	31.8953	yes	120.039	yes	86.6839	yes
PVX_094810	PF3D7_1011800	PRE-binding protein	60	59.5591	yes	618.326	yes	422.178	yes	454.543	yes
PVX_095095	PF3D7_0322700	conserved Plasmodium protein, unknown function	71	0	no	35.5559	yes	48.116	yes	62.4524	yes
PVX_095190	PF3D7_0320900	histone H2A.Z	61	81.1312	yes	1176.37	yes	1002.04	yes	1436.75	yes
PVX_095350	PF3D7_0317600	40S ribosomal protein S11, putative	122	0	no	207.175	yes	187.893	yes	221.52	yes
PVX_096030
PVX_096035
PVX_096265	PF3D7_0721600	40S ribosomal protein S5, putative	61	514.669	yes	2589.64	yes	2596.81	yes	1828.02	yes
PVX_097575
PVX_097760	PF3D7_0503800	60S ribosomal protein L31	61	0	no	588.806	yes	412.001	yes	551.876	yes
PVX_097915	PF3D7_0507100	60S ribosomal protein L4	61	27.3481	yes	2136.15	yes	1865.03	yes	1584.8	yes
PVX_097940	PF3D7_0507600	protein CAF40, putative	60	0	no	46.5916	yes	75.5501	yes	93.4361	yes
PVX_098060	PF3D7_0510000	conserved Plasmodium protein, unknown function	44	0	no	36.5026	yes	25.0541	yes	18.6172	yes
PVX_098585	PF3D7_0402300	reticulocyte binding protein homologue 1	51	0	no	0	no	0.102113	no	0.294649	no
PVX_098640	PF3D7_0903900	60S ribosomal protein L32	61	464.245	yes	689.852	yes	905.115	yes	1138.6	yes
PVX_098700	PF3D7_0905100	nucleoporin NUP221, putative	68	202.871	yes	283.686	yes	375.041	yes	259.46	yes
PVX_098705	PF3D7_0905200	mitochondrial carrier protein, putative	61	0	no	45.4602	yes	64.3006	yes	62.3294	yes
PVX_098710	PF3D7_0729900	dynein heavy chain, putative	381	0	no	0.112835	no	1.9258	yes	1.70612	yes
PVX_098950	PF3D7_0804500	conserved Plasmodium membrane protein, unknown function	127	74.3729	yes	53.9947	yes	48.5703	yes	83.2419	yes
PVX_099510	PF3D7_0921900	conserved Plasmodium protein, unknown function	58	0	no	374.181	yes	326.205	yes	312.46	yes
PVX_099525	PF3D7_0922200	S-adenosylmethionine synthetase	61	180.429	yes	1222.58	yes	2085.81	yes	983.811	yes
PVX_099530	PF3D7_0922400	para-aminobenzoic acid synthetase	56	0	no	273.838	yes	74.5608	yes	63.5774	yes
PVX_099930	PF3D7_0929400	high molecular weight rhoptry protein 2	67	80.6811	yes	62.0492	yes	72.4707	yes	167.653	yes
PVX_100005	PF3D7_0930800	regulator of chromosome condensation, putative	46	9.68772	yes	62.8216	yes	29.192	yes	51.1967	yes
PVX_100625	PF3D7_1233300	pentatricopeptide repeat domain-containing protein 2, putative	61	113.084	yes	425.962	yes	242.346	yes	232.246	yes
PVX_101035	PF3D7_1242700	40S ribosomal protein S17, putative	56	301.427	yes	2129.51	yes	1574.23	yes	2041.15	yes
PVX_101200	PF3D7_1246200	actin I	122	141.392	yes	1002.76	yes	1078.4	yes	1224.37	yes
PVX_101400	PF3D7_1250100	osmiophilic body protein G377	58	0	no	0	no	1.26596	yes	0.415951	no
PVX_101555	PF3D7_0415200	conserved Plasmodium protein, unknown function	72	0	no	1.33904	yes	3.29862	yes	13.3849	yes
PVX_110835	PF3D7_0202600	nucleic acid-binding protein, putative	37	14.9394	yes	152.46	yes	119.964	yes	124.097	yes
PVX_110915	PF3D7_1036900	conserved Plasmodium protein, unknown function	38	35.4893	yes	106.565	yes	143.006	yes	143.297	yes
PVX_111290	PF3D7_1028700	merozoite TRAP-like protein	42	0	no	29.5455	yes	56.6479	yes	74.1224	yes
PVX_111330	PF3D7_1027800	60S ribosomal protein L3	60	0	no	937.012	yes	1157.01	yes	901.143	yes
PVX_111355	PF3D7_1027300	peroxiredoxin	58	81.6162	yes	64.9894	yes	232.856	yes	369.856	yes
PVX_113265	PF3D7_0602000	zinc finger protein, putative	63	0	no	35.9585	yes	36.5246	yes	24.9798	yes
PVX_113295	PF3D7_0602600	SAC3 domain-containing protein, putative	60	109.057	yes	114.732	yes	79.0745	yes	84.7971	yes
PVX_113665	PF3D7_0610400	histone H3	121	351.945	yes	55.136	yes	130.398	yes	227.445	yes
PVX_113780	PF3D7_0612800	6-cysteine protein P12p	59	91.5446	yes	61.7805	yes	151.972	yes	258.142	yes
PVX_113850	PF3D7_0614300	major facilitator superfamily-related transporter, putative	61	0	no	59.2191	yes	144.458	yes	166.228	yes
PVX_113860	PF3D7_0614500	60S ribosomal protein L19	60	723.472	yes	1592.32	yes	1640.21	yes	1733.13	yes
PVX_113995	PF3D7_0617100	AP-2 complex subunit alpha, putative	62	57.834	yes	11.5041	yes	52.3288	yes	58.161	yes
PVX_114015	PF3D7_0617800	histone H2A	62	8945.25	yes	6744.44	yes	5359.37	yes	8718.67	yes
PVX_114040	PF3D7_0618300	60S ribosomal protein L27a, putative	62	418.566	yes	1171.7	yes	1477.05	yes	1738.11	yes
PVX_114370	PF3D7_0203900	5'-3' exonuclease, putative	117	0	no	38.7961	yes	130.011	yes	104.614	yes
PVX_114480	PF3D7_0627500	protein DJ-1	61	899.652	yes	2443.04	yes	2244.35	yes	1937.6	yes
PVX_114515	PF3D7_0628300	choline/ethanolaminephosphotransferase, putative	60	0	no	1052.71	yes	1637.92	yes	1428.01	yes
PVX_114830	PF3D7_1357000	elongation factor 1-alpha	115	0	no	109.239	yes	188.382	yes	119.054	yes
PVX_114910	PF3D7_1358800	40S ribosomal protein S15	61	580.565	yes	986.76	yes	1163.11	yes	1953.12	yes
PVX_114990	PF3D7_1360500	guanylyl cyclase beta	56	0	no	15.2035	yes	12.191	yes	11.2841	yes
PVX_115255	PF3D7_1365900	ubiquitin-60S ribosomal protein L40	62	0	no	467.347	yes	405.659	yes	562.049	yes
PVX_115275	PF3D7_1366300	conserved Plasmodium protein, unknown function	51	46.7813	yes	21.1053	yes	48.2099	yes	56.7699	yes
PVX_115460
PVX_116655	PF3D7_1324300	conserved Plasmodium membrane protein, unknown function	64	78.1583	yes	18.8547	yes	25.6696	yes	32.4682	yes
PVX_116700	PF3D7_1323400	60S ribosomal protein L23	60	570.696	yes	686.272	yes	485.892	yes	661.709	yes
PVX_116715	PF3D7_1323100	60S ribosomal protein L6, putative	60	135.159	yes	483.389	yes	711.732	yes	801.22	yes
PVX_116915	PF3D7_1471100	exported protein 2	61	342.612	yes	983.17	yes	1239.8	yes	693.66	yes
PVX_117060	PF3D7_1468100	MORC family protein	61	0	no	148.59	yes	232.986	yes	278.673	yes
PVX_117135	PF3D7_1466600	enkurin domain-containing protein, putative	63	0	no	2.03424	yes	18.6016	yes	13.3501	yes
PVX_117390	PF3D7_1461300	40S ribosomal protein S28e, putative	61	91.779	yes	387.501	yes	471.843	yes	753.399	yes
PVX_117420	PF3D7_1460700	60S ribosomal protein L27	60	152.024	yes	472.19	yes	215.871	yes	337.793	yes
PVX_117440	PF3D7_1460300	60S ribosomal protein L29, putative	58	0	no	254.761	yes	380.733	yes	662.702	yes
PVX_117570	PF3D7_1457900	conserved Plasmodium protein, unknown function	34	0	no	5.91486	yes	19.6595	yes	39.6825	yes
PVX_117685	PF3D7_1455600	ferlin, putative	59	0	no	9.70067	yes	23.4358	yes	11.2309	yes
PVX_118145	PF3D7_1447000	40S ribosomal protein S5	60	249.809	yes	1312.85	yes	1442.67	yes	1048.33	yes
PVX_118230	PF3D7_1445200	ATP-dependent RNA helicase MAK5, putative	63	52.6538	yes	36.7403	yes	88.8049	yes	98.6099	yes
PVX_118340	PF3D7_1443000	serine/threonine protein kinase	53	0	no	32.1931	yes	59.983	yes	73.5819	yes
PVX_118345	PF3D7_1442900	Sec7 domain-containing protein ARFGEF, putative	38	0	no	69.8852	yes	75.513	yes	94.0136	yes
PVX_118625	PF3D7_1474900	trailer hitch homolog, putative	60	0	no	4.05117	yes	64.5495	yes	86.2301	yes
PVX_118695
PVX_119225
PVX_119250	PF3D7_0302100	serine/threonine protein kinase	63	10.6888	yes	101.801	yes	145.495	yes	177.008	yes
PVX_119345	PF3D7_0304400	60S ribosomal protein L44	62	210.822	yes	699.925	yes	573.5	yes	798.7	yes
PVX_119470	PF3D7_0306900	40S ribosomal protein S23, putative	61	1241.97	yes	1286.2	yes	906.783	yes	1005.35	yes
PVX_119765	PF3D7_0313400	conserved Plasmodium protein, unknown function	55	0	no	31.8856	yes	54.0274	yes	50.2096	yes
PVX_121965	PF3D7_1010200	DNA2/NAM7 helicase, putative	125	0	no	49.5352	yes	91.4997	yes	65.8728	yes
PVX_122030	PF3D7_1303800	conserved Plasmodium protein, unknown function	43	24.3567	yes	6.03568	yes	11.4483	yes	35.8602	yes
PVX_122285	PF3D7_1309100	60S ribosomal protein L24, putative	60	677.737	yes	2315.89	yes	1784.9	yes	2007.22	yes
PVX_122465
PVX_123060	PF3D7_0814200	DNA/RNA-binding protein Alba 1	60	1155.54	yes	2181.19	yes	3988.66	yes	2708.61	yes
PVX_123070	PF3D7_0814000	60S ribosomal protein L13-2, putative	63	268.686	yes	1189.46	yes	912.952	yes	985.941	yes
PVX_123075	PF3D7_0813900	40S ribosomal protein S16, putative	61	570.177	yes	954.525	yes	888.605	yes	997.8	yes
PVX_123800	PF3D7_1223400	phospholipid-transporting ATPase, putative	65	10.458	yes	163.395	yes	118.643	yes	172.053	yes
PVX_123805	PF3D7_1223500	conserved Plasmodium protein, unknown function	32	20.4594	yes	44.3528	yes	40.7576	yes	54.5023	yes
PVX_123845	PF3D7_1224300	polyadenylate-binding protein 1, putative	62	0	no	261.34	yes	383.249	yes	278.088	yes
PVX_124080	PF3D7_1229000	conserved Plasmodium membrane protein, unknown function	64	0	no	9.57699	yes	36.4039	yes	52.8658	yes
PVX_169270
PVX_000010
Blue	no ortholog	22
Red	not expressed	1
Overall expression					87/166		138/166		143/166		140/166

## Sheet: P. falciparum - all stages
Analysis by PlasmoDB, based on RNAseq Transcriptomes
				Data Set: Transcriptomes of 7 sexual and asexual life stages (TPM)												Data Set: Ring, Oocyst and Sporozoite Transcriptomes (TPM)
Input Ortholog(s)	Gene ID	Product Description	Ortholog count	Ring	Stage Expression	Early Trophozoite - unique	Stage Expression	Late Trophozoite - unique	Stage Expression	Schizont - unique	Stage Expression	Gametocyte II - unique	Stage Expression	Gametocyte V - unique	Stage Expression	sense - Sporozoite - unique only	Stage Expression	sense - Ring - unique only	Stage Expression	sense - Oocyst - unique only	Stage Expression
PVX_001780	PF3D7_1018300	peptidase, putative	60	73.16	yes	29.25	yes	22.98	yes	2.82	yes	4.28	yes	36.34	yes	15.42	yes	223.96	yes	92.67	yes
PVX_001810	PF3D7_1019000	eukaryotic translation initiation factor subunit eIF2A, putative	53	225.7	yes	93.84	yes	47.82	yes	21.01	yes	11.12	yes	21.07	yes	188.55	yes	106.8	yes	92.33	yes
PVX_001835	PF3D7_1019400	60S ribosomal protein L30e, putative	60	151.18	yes	124.64	yes	63.22	yes	5.98	yes	57.61	yes	81.27	yes	35.78	yes	1051.31	yes	258.6	yes
PVX_001895	PF3D7_1020700	N-acetyltransferase, GNAT family, putative	58	38.87	yes	20.19	yes	4.93	yes	0.37	no	1.27	yes	14.24	yes	8.22	yes	62.35	yes	34.22	yes
PVX_001950	PF3D7_1021700	VPS13 domain-containing protein, putative	20	9.57	yes	32.18	yes	11.65	yes	6.03	yes	2.83	yes	36.46	yes	14.47	yes	3.29	yes	13.51	yes
PVX_002590	PF3D7_0219200	40S ribosomal protein S30	47	115.59	yes	101.46	yes	58.64	yes	4.95	yes	59.44	yes	45.25	yes	11.31	yes	1938.2	yes	604.17	yes
PVX_002945	PF3D7_0211700	tyrosine kinase-like protein, putative	50	5.71	yes	4.09	yes	7.06	yes	1.34	yes	2.07	yes	11.86	yes	53.32	yes	0.9	no	16.26	yes
PVX_003565	PF3D7_0202500	early transcribed membrane protein 2	282	3339.01	yes	206.48	yes	206.6	yes	41.33	yes	36.93	yes	8.08	yes	14.23	yes	8019.32	yes	5.15	yes
PVX_003570
PVX_003695
PVX_003810	PF3D7_0207300	serine repeat antigen 8	488	6.3	yes	0.45	no	1.03	yes	0.69	no	0.43	no	1.88	yes	1078.97	yes	0.74	no	5.34	yes
PVX_003905	PF3D7_0209000	6-cysteine protein P230	61	6.33	yes	0.85	no	0.45	no	0	no	8.53	yes	99.99	yes	20.01	yes	0.68	no	2.53	yes
PVX_003955	PF3D7_0210100	60S ribosomal protein L37ae, putative	61	550.93	yes	482.78	yes	198.68	yes	72.4	yes	527.03	yes	818.94	yes	108.29	yes	2251.14	yes	660.6	yes
PVX_077695
PVX_080090	PF3D7_0523200	heptatricopeptide repeat-containing protein, putative	60	8.93	yes	8.18	yes	4.88	yes	1.78	yes	1.73	yes	14.81	yes	0.99	no	1.14	yes	3.26	yes
PVX_080270	PF3D7_0519500	CCR4 domain-containing protein 1, putative	57	30.46	yes	63.22	yes	16.8	yes	3.75	yes	4.56	yes	29.01	yes	66.65	yes	6.3	yes	60.87	yes
PVX_080275	PF3D7_0519400	40S ribosomal protein S24	61	780.28	yes	349	yes	137.13	yes	26.09	yes	146.01	yes	173.18	yes	117.66	yes	1870.5	yes	707.07	yes
PVX_080405	PF3D7_0516900	60S ribosomal protein L2	122	1604.47	yes	3148.3	yes	873.98	yes	471.41	yes	68.91	yes	50.94	yes	23.74	yes	3509.7	yes	663.14	yes
PVX_080660	PF3D7_0511500	RNA pseudouridylate synthase, putative	17	123.39	yes	80.8	yes	23.46	yes	4.89	yes	3.7	yes	34.06	yes	140.45	yes	83.72	yes	59.46	yes
PVX_081615	PF3D7_0102800	seipin domain-containing protein, putative	45	5.26	yes	1.16	yes	2.92	yes	1.04	yes	3.81	yes	41.17	yes	0.98	no	0.52	no	10.71	yes
PVX_082480	PF3D7_1434500	dynein-related AAA-type ATPase, putative	451	46.73	yes	45.83	yes	7.08	yes	0.54	no	1.98	yes	20.47	yes	3.47	yes	30.08	yes	18.6	yes
PVX_082800	PF3D7_1337400	zinc finger protein, putative	62	55.23	yes	7.07	yes	11.77	yes	1.71	yes	2.76	yes	30.1	yes	2.67	yes	32.3	yes	21.69	yes
PVX_082840	PF3D7_1338200	60S ribosomal protein L6, putative	61	178.02	yes	111.44	yes	44.82	yes	3.22	yes	28.96	yes	59.05	yes	37.53	yes	985.55	yes	308.56	yes
PVX_082965	PF3D7_1341200	60S ribosomal protein L18, putative	60	311.87	yes	221.18	yes	108.15	yes	16.9	yes	60.88	yes	83.53	yes	15.14	yes	1913.36	yes	421.98	yes
PVX_083000	PF3D7_1342000	40S ribosomal protein S6	60	373.69	yes	306.1	yes	149.68	yes	19.3	yes	14.43	yes	36.14	yes	59.63	yes	1953.08	yes	820.39	yes
PVX_083465	PF3D7_1351400	60S ribosomal protein L17, putative	60	743.67	yes	497.8	yes	292.43	yes	39.79	yes	369.66	yes	158.18	yes	33.09	yes	3497.02	yes	518.33	yes
PVX_083555
PVX_083560	PF3D7_1353100	Plasmodium exported protein, unknown function	41	237.88	yes	272.75	yes	12.47	yes	0.8	no	4.29	yes	3.93	yes	0.48	no	2067.95	yes	8.19	yes
PVX_084160	PF3D7_1202300	dynein heavy chain, putative	57	3.89	yes	0.14	no	1.1	yes	0.2	no	1.64	yes	18.13	yes	1.51	yes	0.66	no	5.32	yes
PVX_084310	PF3D7_1205600	tetratricopeptide repeat protein, putative	61	18.28	yes	50.17	yes	85.34	yes	19.59	yes	20.31	yes	47.55	yes	8.82	yes	24.4	yes	166.55	yes
PVX_084325
PVX_084350	PF3D7_1206300	conserved Plasmodium protein, unknown function	16	7.47	yes	1.05	yes	6.13	yes	6.49	yes	2.18	yes	16.81	yes	915.63	yes	1.21	yes	6.73	yes
PVX_084795	PF3D7_1434800	mitochondrial acidic protein MAM33, putative	61	16.52	yes	43.49	yes	34.24	yes	3.31	yes	21.26	yes	24.17	yes	5.93	yes	11.59	yes	219.38	yes
PVX_084855	PF3D7_1239500	DNA gyrase subunit B	122	5.51	yes	3.13	yes	11.55	yes	1.98	yes	3.36	yes	8.99	yes	7.24	yes	1.24	yes	28.94	yes
PVX_084865
PVX_084955	PF3D7_1431700	60S ribosomal protein L14, putative	61	402.98	yes	382.32	yes	156.1	yes	43.83	yes	289.21	yes	128.75	yes	84	yes	1914.34	yes	592.97	yes
PVX_085030	PF3D7_0808200	plasmepsin X	123	5.17	yes	0.79	no	14.66	yes	7.68	yes	2.18	yes	16.99	yes	940.6	yes	33.08	yes	33.02	yes
PVX_085270	PF3D7_1424400	60S ribosomal protein L7-3, putative	61	338.5	yes	287.32	yes	112.46	yes	9.47	yes	13.39	yes	22.95	yes	95.67	yes	1679.26	yes	546.2	yes
PVX_085275	PF3D7_1424100	60S ribosomal protein L5, putative	60	504.89	yes	589.18	yes	262.21	yes	53.34	yes	13.25	yes	26.4	yes	10.78	yes	2439.07	yes	501.31	yes
PVX_085310
PVX_085420	PF3D7_1421200	40S ribosomal protein S25	43	273.22	yes	496.15	yes	161.45	yes	100.96	yes	318.88	yes	181.82	yes	159.05	yes	1877.47	yes	725.76	yes
PVX_085735	PF3D7_1414300	60S ribosomal protein L10, putative	61	278.63	yes	649.33	yes	337.77	yes	79.52	yes	157.38	yes	123.18	yes	13.98	yes	3082.79	yes	776.45	yes
PVX_085790
PVX_085800
PVX_085885	PF3D7_1411300	DnaJ protein, putative	56	12.32	yes	5.07	yes	8.95	yes	1.98	yes	1.49	yes	7.32	yes	2.1	yes	13.19	yes	12.73	yes
PVX_085890	PF3D7_1411200	rhomboid protease ROM8	60	172.02	yes	47.91	yes	22.39	yes	8.33	yes	6.17	yes	33.69	yes	194.15	yes	154.39	yes	25.44	yes
PVX_086020	PF3D7_1408600	40S ribosomal protein S8e, putative	60	1047.07	yes	959.18	yes	387.63	yes	72.33	yes	195.08	yes	174.28	yes	13.28	yes	5517.96	yes	1293.79	yes
PVX_086120	PF3D7_1406200	transcription elongation factor SPT6, putative	67	102.71	yes	61.35	yes	21.1	yes	2.44	yes	5.82	yes	29.94	yes	10.36	yes	69.22	yes	68.87	yes
PVX_087745
PVX_087860	PF3D7_0706400	60S ribosomal protein L37	58	231.75	yes	135.92	yes	50.86	yes	6.52	yes	71.7	yes	113.5	yes	53.32	yes	1047.39	yes	259.08	yes
PVX_087885	PF3D7_0707300	rhoptry-associated membrane antigen	32	16.53	yes	1.78	yes	202.7	yes	189.63	yes	14.25	yes	25.2	yes	3.89	yes	31.16	yes	96.75	yes
PVX_087950	PF3D7_0708400	heat shock protein 90	124	729.39	yes	1583.95	yes	599.85	yes	66.64	yes	50.05	yes	84.48	yes	1126.71	yes	2125.73	yes	2184.11	yes
PVX_088065	PF3D7_0710600	60S ribosomal protein L34	61	429.21	yes	584	yes	220.1	yes	42.35	yes	352.09	yes	223.04	yes	30.75	yes	2616.87	yes	683.19	yes
PVX_089015	PF3D7_0827000	ATP-dependent RNA helicase DBP10, putative	60	70.36	yes	41.06	yes	15.42	yes	1.18	yes	0.91	no	8.26	yes	48.92	yes	101.71	yes	116.33	yes
PVX_089055	PF3D7_0826100	HECT-like E3 ubiquitin ligase, putative	64	99.48	yes	75.67	yes	24.99	yes	3.25	yes	6.02	yes	43.36	yes	76.06	yes	57.91	yes	55.18	yes
PVX_089280	PF3D7_0821700	60S ribosomal protein L22, putative	60	53.23	yes	76.73	yes	31.7	yes	4.76	yes	26.23	yes	90.63	yes	17.45	yes	778.43	yes	270.62	yes
PVX_089750	PF3D7_0415900	60S ribosomal protein L15, putative	60	1135.97	yes	793.88	yes	245.39	yes	54.51	yes	319.48	yes	238.7	yes	17.93	yes	2301.2	yes	540.72	yes
PVX_090155	PF3D7_0422300	alpha tubulin 2	121	57.29	yes	19.6	yes	199.73	yes	31.94	yes	218.46	yes	277.27	yes	4.41	yes	35.99	yes	44.86	yes
PVX_090160	PF3D7_0422400	40S ribosomal protein S19	60	265.03	yes	189.45	yes	98.34	yes	8.91	yes	81.63	yes	161.57	yes	72.05	yes	2638.93	yes	538.52	yes
PVX_090230	PF3D7_0202500	early transcribed membrane protein 2	282	3339.01	yes	206.48	yes	206.6	yes	41.33	yes	36.93	yes	8.08	yes	14.23	yes	8019.32	yes	5.15	yes
PVX_090930	PF3D7_1105000	histone H4	57	247.1	yes	153.18	yes	1528.61	yes	589.73	yes	850.05	yes	3246.31	yes	150.16	yes	880.73	yes	1122.48	yes
PVX_091145	PF3D7_1109900	60S ribosomal protein L36	61	95.5	yes	75.15	yes	25.02	yes	7.67	yes	32.01	yes	49.38	yes	15.31	yes	1322.48	yes	371.45	yes
PVX_091485	PF3D7_1117100	ubiquitin carboxyl-terminal hydrolase UCH54	61	5.03	yes	2	yes	26.7	yes	16.49	yes	4.3	yes	49.77	yes	2.83	yes	3.75	yes	114.51	yes
PVX_091630
PVX_091635
PVX_091735	PF3D7_1122300	conserved Plasmodium protein, unknown function	60	15.2	yes	0.51	no	2.51	yes	1	yes	2.38	yes	52.34	yes	1.93	yes	8.29	yes	3.6	yes
PVX_091865	PF3D7_1124900	60S ribosomal protein L35, putative	61	181.9	yes	204.42	yes	60.89	yes	26.24	yes	258.05	yes	1652.47	yes	49.11	yes	880.44	yes	332.51	yes
PVX_091925	PF3D7_1126200	40S ribosomal protein S18, putative	60	973.78	yes	448.53	yes	220.4	yes	70.31	yes	572.01	yes	287.04	yes	86.37	yes	2536.56	yes	568.64	yes
PVX_092120	PF3D7_1130200	60S ribosomal protein P0	61	1163.17	yes	995.01	yes	428.93	yes	172.28	yes	87.91	yes	103.68	yes	99	yes	4331.84	yes	1051.47	yes
PVX_092335	PF3D7_1134500	alpha/beta hydrolase, putative	59	14.37	yes	9.4	yes	8.31	yes	2.18	yes	1.06	yes	14.5	yes	7.01	yes	8.04	yes	17.98	yes
PVX_092730	PF3D7_1142500	60S ribosomal protein L28	62	138.01	yes	232.06	yes	77.25	yes	12.08	yes	123.19	yes	50.59	yes	37.77	yes	1441.69	yes	266.93	yes
PVX_092735	PF3D7_1142600	60S ribosomal protein L35ae, putative	59	241.16	yes	152.73	yes	54.27	yes	5.84	yes	65.35	yes	87.42	yes	151.9	yes	3168.33	yes	587.43	yes
PVX_092820	PF3D7_1144300	60S ribosomal protein L41	46	212.45	yes	1000.09	yes	240.61	yes	137.04	yes	516.27	yes	178.01	yes	144.52	yes	1769.21	yes	999.25	yes
PVX_092995	PF3D7_0102700	merozoite-associated tryptophan-rich antigen	619	12.11	yes	2.14	yes	3.56	yes	0.37	no	2.3	yes	14.49	yes	103.26	yes	39.66	yes	2.26	yes
PVX_094275
PVX_094305	PF3D7_0611800	conserved Plasmodium protein, unknown function	44	16.29	yes	23.57	yes	13.72	yes	3.46	yes	9.43	yes	77.65	yes	276.78	yes	16.59	yes	72.94	yes
PVX_094400	PF3D7_1004000	60S ribosomal protein L13, putative	61	303.74	yes	246.76	yes	124.08	yes	8.83	yes	112.3	yes	94.36	yes	73.2	yes	2855.29	yes	709.31	yes
PVX_094600	PF3D7_1008100	PHD finger protein PHD1	38	86.17	yes	53.3	yes	21.26	yes	8.32	yes	3.22	yes	17.25	yes	133.54	yes	48.35	yes	34.7	yes
PVX_094635	PF3D7_1008700	tubulin beta chain	59	33.02	yes	39.26	yes	637.59	yes	248.09	yes	237.32	yes	201.96	yes	28.76	yes	65.72	yes	918.79	yes
PVX_094675	PF3D7_1009200	ribonuclease, putative	62	32.31	yes	5.41	yes	3.43	yes	0.64	no	2.47	yes	15.81	yes	1.85	yes	39.28	yes	23.15	yes
PVX_094810	PF3D7_1011800	PRE-binding protein	60	393.91	yes	383.43	yes	88.77	yes	14.46	yes	23.65	yes	184.56	yes	198	yes	351.72	yes	566.13	yes
PVX_095095	PF3D7_0322700	conserved Plasmodium protein, unknown function	71	16.18	yes	14.85	yes	11.66	yes	1.74	yes	3.09	yes	17.13	yes	7.8	yes	18.94	yes	29.29	yes
PVX_095190	PF3D7_0320900	histone H2A.Z	61	260.4	yes	330.62	yes	1134.08	yes	1142.4	yes	659.29	yes	134.75	yes	62.17	yes	1248.65	yes	519.95	yes
PVX_095350	PF3D7_0317600	40S ribosomal protein S11, putative	122	719.09	yes	557.12	yes	229.51	yes	44.62	yes	128.79	yes	161.81	yes	111.31	yes	3118.53	yes	554.08	yes
PVX_096030
PVX_096035
PVX_096265	PF3D7_0721600	40S ribosomal protein S5, putative	61	1392.72	yes	990.21	yes	392.28	yes	48.67	yes	248.03	yes	145.91	yes	42.32	yes	3527.41	yes	899.06	yes
PVX_097575
PVX_097760	PF3D7_0503800	60S ribosomal protein L31	61	102.46	yes	268.06	yes	114.41	yes	12.72	yes	128.29	yes	223.89	yes	78.59	yes	1696.89	yes	406.31	yes
PVX_097915	PF3D7_0507100	60S ribosomal protein L4	61	1015.63	yes	1201.12	yes	449.42	yes	114.39	yes	19.7	yes	33.01	yes	25.16	yes	4235.84	yes	752.26	yes
PVX_097940	PF3D7_0507600	protein CAF40, putative	60	41.32	yes	26.94	yes	36.85	yes	6.34	yes	6.4	yes	13.94	yes	10.68	yes	78.07	yes	52.63	yes
PVX_098060	PF3D7_0510000	conserved Plasmodium protein, unknown function	44	4.82	yes	1.35	yes	5.9	yes	3.27	yes	3.04	yes	13.16	yes	21.32	yes	0.37	no	7.7	yes
PVX_098585	PF3D7_0402300	reticulocyte binding protein homologue 1	51	17.75	yes	5.83	yes	49.44	yes	13.59	yes	0.18	no	1.8	yes	0.72	no	2.97	yes	0.04	no
PVX_098640	PF3D7_0903900	60S ribosomal protein L32	61	555.78	yes	465.26	yes	197.15	yes	41.05	yes	553.85	yes	290.23	yes	151.7	yes	2509.77	yes	999.51	yes
PVX_098700	PF3D7_0905100	nucleoporin NUP221, putative	68	84.28	yes	50.47	yes	62.23	yes	13.05	yes	3.36	yes	17.18	yes	111.76	yes	92.89	yes	35	yes
PVX_098705	PF3D7_0905200	mitochondrial carrier protein, putative	61	16.76	yes	7.29	yes	3.6	yes	0.59	no	2.14	yes	5.7	yes	13.3	yes	47.92	yes	9.69	yes
PVX_098710	PF3D7_0729900	dynein heavy chain, putative	381	4.81	yes	0.36	no	0.9	no	0.35	no	0.32	no	10.99	yes	39.73	yes	1.6	yes	20.36	yes
PVX_098950	PF3D7_0804500	conserved Plasmodium membrane protein, unknown function	127	20.68	yes	21.82	yes	19.27	yes	5.83	yes	4.01	yes	55.55	yes	17.23	yes	14.46	yes	66.16	yes
PVX_099510	PF3D7_0921900	conserved Plasmodium protein, unknown function	58	124.92	yes	33.3	yes	21.13	yes	1.71	yes	5.64	yes	46.13	yes	7.92	yes	380.83	yes	118.51	yes
PVX_099525	PF3D7_0922200	S-adenosylmethionine synthetase	61	315.15	yes	102.02	yes	890.99	yes	258.09	yes	11.44	yes	83.26	yes	330.77	yes	1298.63	yes	475.26	yes
PVX_099530	PF3D7_0922400	para-aminobenzoic acid synthetase	56	5.75	yes	0.45	no	2.76	yes	0.1	no	1.83	yes	18.88	yes	3.19	yes	0.7	no	8.77	yes
PVX_099930	PF3D7_0929400	high molecular weight rhoptry protein 2	67	14.32	yes	1.05	yes	231.19	yes	161.35	yes	4.05	yes	13.19	yes	4.76	yes	16.33	yes	16.87	yes
PVX_100005	PF3D7_0930800	regulator of chromosome condensation, putative	46	4.23	yes	7.13	yes	9.44	yes	1.69	yes	1.92	yes	25.73	yes	27.46	yes	0.59	no	21.6	yes
PVX_100625	PF3D7_1233300	pentatricopeptide repeat domain-containing protein 2, putative	61	7.44	yes	4.93	yes	6.87	yes	0.25	no	2.05	yes	14.33	yes	0.68	no	1.61	yes	107.58	yes
PVX_101035	PF3D7_1242700	40S ribosomal protein S17, putative	56	273.91	yes	363.31	yes	204.11	yes	14.89	yes	277.19	yes	324.95	yes	40.95	yes	3413.52	yes	868.92	yes
PVX_101200	PF3D7_1246200	actin I	122	55.25	yes	77.34	yes	1088.75	yes	970.19	yes	191.01	yes	748.05	yes	412.51	yes	140.62	yes	787.41	yes
PVX_101400	PF3D7_1250100	osmiophilic body protein G377	58	4.67	yes	0.37	no	0.75	no	0.41	no	1.61	yes	32.36	yes	0.82	no	0.31	no	0.5	no
PVX_101555	PF3D7_0415200	conserved Plasmodium protein, unknown function	72	6.22	yes	2.13	yes	9.55	yes	2.06	yes	0.73	no	7.24	yes	2.13	yes	1.17	yes	4.05	yes
PVX_110835	PF3D7_0202600	nucleic acid-binding protein, putative	37	21.75	yes	10.42	yes	8.62	yes	1.36	yes	1.26	yes	29.74	yes	21.77	yes	11.51	yes	47.29	yes
PVX_110915	PF3D7_1036900	conserved Plasmodium protein, unknown function	38	225.83	yes	57.69	yes	32.04	yes	4.98	yes	21.91	yes	169.45	yes	141.92	yes	172.58	yes	177.97	yes
PVX_111290	PF3D7_1028700	merozoite TRAP-like protein	42	9.67	yes	0.78	no	68.52	yes	19.61	yes	10.6	yes	45.65	yes	136.47	yes	27.7	yes	22.63	yes
PVX_111330	PF3D7_1027800	60S ribosomal protein L3	60	770.37	yes	705.27	yes	466.74	yes	64.19	yes	52.59	yes	45.18	yes	54.28	yes	4791.29	yes	922.97	yes
PVX_111355	PF3D7_1027300	peroxiredoxin	58	236.88	yes	45.44	yes	438.32	yes	815.09	yes	92.97	yes	54.92	yes	64.62	yes	422.44	yes	254.49	yes
PVX_113265	PF3D7_0602000	zinc finger protein, putative	63	5.39	yes	1.21	yes	4.54	yes	0.42	no	3.63	yes	53.79	yes	2.13	yes	1.51	yes	4.42	yes
PVX_113295	PF3D7_0602600	SAC3 domain-containing protein, putative	60	63.37	yes	11.71	yes	8.11	yes	1.23	yes	2.24	yes	17.14	yes	14.5	yes	38.66	yes	35.51	yes
PVX_113665	PF3D7_0610400	histone H3	121	0	no	0.23	no	1.39	yes	0.89	no	15.05	yes	31.12	yes	743.55	yes	899.87	yes	1118.25	yes
PVX_113780	PF3D7_0612800	6-cysteine protein P12p	59	13.48	yes	7.84	yes	3.43	yes	1.59	yes	6.7	yes	45.61	yes	222.67	yes	25.54	yes	37.42	yes
PVX_113850	PF3D7_0614300	major facilitator superfamily-related transporter, putative	61	120.89	yes	121.85	yes	120.63	yes	36.6	yes	12.05	yes	20.66	yes	1.4	yes	214.63	yes	26.77	yes
PVX_113860	PF3D7_0614500	60S ribosomal protein L19	60	136.6	yes	133.67	yes	71.26	yes	6.45	yes	31.69	yes	65.89	yes	52.86	yes	1271.12	yes	425.81	yes
PVX_113995	PF3D7_0617100	AP-2 complex subunit alpha, putative	62	58.66	yes	41.02	yes	18.13	yes	6.24	yes	5.06	yes	25.21	yes	21.52	yes	61.91	yes	18.05	yes
PVX_114015	PF3D7_0617800	histone H2A	62	217.38	yes	210.27	yes	4306.03	yes	1339.02	yes	1774.87	yes	2651.16	yes	478.42	yes	1811.82	yes	2755.53	yes
PVX_114040	PF3D7_0618300	60S ribosomal protein L27a, putative	62	465.64	yes	215.55	yes	132	yes	96.46	yes	72.34	yes	99.81	yes	42.53	yes	1138.63	yes	323.87	yes
PVX_114370	PF3D7_0203900	5'-3' exonuclease, putative	117	5.23	yes	8.73	yes	21.43	yes	4.46	yes	1.81	yes	13.65	yes	11.64	yes	1.62	yes	16.39	yes
PVX_114480	PF3D7_0627500	protein DJ-1	61	299.23	yes	270.15	yes	191.03	yes	38.95	yes	146.23	yes	67.62	yes	1.21	yes	1077.7	yes	242.5	yes
PVX_114515	PF3D7_0628300	choline/ethanolaminephosphotransferase, putative	60	113.33	yes	20.96	yes	299.98	yes	81.7	yes	39.19	yes	223.5	yes	24.92	yes	95.59	yes	159	yes
PVX_114830	PF3D7_1357000	elongation factor 1-alpha	115	120.59	yes	267.08	yes	130.13	yes	34.53	yes	17.52	yes	10.05	yes	13.15	yes	1731.98	yes	356.49	yes
PVX_114910	PF3D7_1358800	40S ribosomal protein S15	61	189.89	yes	207.18	yes	86.98	yes	5.99	yes	74.09	yes	75.84	yes	3.47	yes	1996.98	yes	333.62	yes
PVX_114990	PF3D7_1360500	guanylyl cyclase beta	56	4.91	yes	0.62	no	1.5	yes	0.11	no	1.52	yes	27.26	yes	4.91	yes	0.37	no	3.88	yes
PVX_115255	PF3D7_1365900	ubiquitin-60S ribosomal protein L40	62	282.82	yes	320.69	yes	200.86	yes	37.37	yes	342.84	yes	467.65	yes	664.18	yes	2238.53	yes	683.32	yes
PVX_115275	PF3D7_1366300	conserved Plasmodium protein, unknown function	51	75.37	yes	41.91	yes	14.07	yes	1.33	yes	3.05	yes	27.38	yes	78.52	yes	60.96	yes	41.04	yes
PVX_115460
PVX_116655	PF3D7_1324300	conserved Plasmodium membrane protein, unknown function	64	22.2	yes	4.22	yes	4.57	yes	0.59	no	2.96	yes	33.46	yes	19.92	yes	1.46	yes	14.51	yes
PVX_116700	PF3D7_1323400	60S ribosomal protein L23	60	294.72	yes	206.52	yes	100	yes	19.62	yes	40.97	yes	57.18	yes	23.13	yes	2451.84	yes	695.95	yes
PVX_116715	PF3D7_1323100	60S ribosomal protein L6, putative	60	213.7	yes	245.3	yes	104.3	yes	17.28	yes	49.63	yes	63.79	yes	8.53	yes	1749.78	yes	344.79	yes
PVX_116915	PF3D7_1471100	exported protein 2	61	384.53	yes	1445.82	yes	386.76	yes	37.45	yes	51.11	yes	19.77	yes	172.78	yes	551.49	yes	28.09	yes
PVX_117060	PF3D7_1468100	MORC family protein	61	170.77	yes	129.57	yes	91.3	yes	24.26	yes	7.88	yes	27.78	yes	271.41	yes	214.01	yes	108.3	yes
PVX_117135	PF3D7_1466600	enkurin domain-containing protein, putative	63	8.35	yes	1.64	yes	0.32	no	0	no	2.2	yes	32.69	yes	1.55	yes	27.64	yes	22.83	yes
PVX_117390	PF3D7_1461300	40S ribosomal protein S28e, putative	61	236.78	yes	171.89	yes	92.65	yes	20.79	yes	333.58	yes	433.04	yes	52.27	yes	740.8	yes	165.37	yes
PVX_117420	PF3D7_1460700	60S ribosomal protein L27	60	232.9	yes	242.16	yes	76.26	yes	12.19	yes	80.06	yes	73.49	yes	113.66	yes	3469.51	yes	589.08	yes
PVX_117440	PF3D7_1460300	60S ribosomal protein L29, putative	58	112.73	yes	112.98	yes	32.31	yes	6.01	yes	60.47	yes	125.83	yes	60.76	yes	1175.76	yes	521.58	yes
PVX_117570	PF3D7_1457900	conserved Plasmodium protein, unknown function	34	12.63	yes	4.67	yes	9.44	yes	3.98	yes	2.58	yes	17.97	yes	0.52	no	5.46	yes	16.36	yes
PVX_117685	PF3D7_1455600	ferlin, putative	59	5.8	yes	0.28	no	3.88	yes	3.49	yes	0.84	no	2.14	yes	0.89	no	0.35	no	2.18	yes
PVX_118145	PF3D7_1447000	40S ribosomal protein S5	60	740.02	yes	1270.54	yes	396.4	yes	181.44	yes	67.76	yes	94.22	yes	111.1	yes	2639.81	yes	635.94	yes
PVX_118230	PF3D7_1445200	ATP-dependent RNA helicase MAK5, putative	63	94.48	yes	30.75	yes	8.48	yes	0.65	no	4.19	yes	14.15	yes	1.62	yes	202.42	yes	53.68	yes
PVX_118340	PF3D7_1443000	serine/threonine protein kinase	53	3.42	yes	0.61	no	4.03	yes	1.69	yes	1.19	yes	9.32	yes	8.9	yes	0.34	no	17.08	yes
PVX_118345	PF3D7_1442900	Sec7 domain-containing protein ARFGEF, putative	38	148.08	yes	18.68	yes	27.7	yes	6.99	yes	3.76	yes	27.09	yes	67.64	yes	122.91	yes	59.2	yes
PVX_118625	PF3D7_1474900	trailer hitch homolog, putative	60	2.01	yes	1.05	yes	11.69	yes	3.12	yes	18.83	yes	57.47	yes	4.72	yes	2	yes	22.68	yes
PVX_118695
PVX_119225
PVX_119250	PF3D7_0302100	serine/threonine protein kinase	63	38.29	yes	33.71	yes	24.41	yes	2.2	yes	3.78	yes	26.91	yes	35.36	yes	66.31	yes	91.67	yes
PVX_119345	PF3D7_0302101	serine/threonine protein kinase	63	38.29	yes	34.71	yes	25.41	yes	3.2	yes	4.78	yes	27.91	yes	36.36	yes	67.31	yes	92.67	yes
PVX_119470	PF3D7_0306900	40S ribosomal protein S23, putative	61	591.61	yes	623.27	yes	260.25	yes	109.84	yes	284.46	yes	149.34	yes	127.92	yes	2184.52	yes	589.88	yes
PVX_119765	PF3D7_0313400	conserved Plasmodium protein, unknown function	55	16.83	yes	8.36	yes	3.97	yes	0.59	no	2.91	yes	50.96	yes	4.03	yes	19.92	yes	36.34	yes
PVX_121965	PF3D7_1010200	DNA2/NAM7 helicase, putative	125	185.97	yes	60.34	yes	12.11	yes	0.93	no	2.12	yes	12.33	yes	1.39	yes	66.25	yes	63.6	yes
PVX_122030	PF3D7_1303800	conserved Plasmodium protein, unknown function	43	5.85	yes	3.71	yes	11.23	yes	1.84	yes	2.07	yes	33.23	yes	17.32	yes	0.62	no	11.57	yes
PVX_122285	PF3D7_1309100	60S ribosomal protein L24, putative	60	302.41	yes	241.43	yes	125.89	yes	19.63	yes	149.63	yes	251.51	yes	1123.2	yes	2865.96	yes	749.24	yes
PVX_122465
PVX_123060	PF3D7_0814200	DNA/RNA-binding protein Alba 1	60	3045.36	yes	2028.17	yes	1052	yes	492.03	yes	221.15	yes	158.23	yes	220.89	yes	2308.63	yes	1227.98	yes
PVX_123070	PF3D7_0814000	60S ribosomal protein L13-2, putative	63	294.13	yes	315.83	yes	135.06	yes	17.92	yes	70.08	yes	131.73	yes	4.5	yes	2945.06	yes	738.88	yes
PVX_123075	PF3D7_0813900	40S ribosomal protein S16, putative	61	231.51	yes	168.64	yes	92.97	yes	16.33	yes	125.34	yes	100.88	yes	9.21	yes	2297.81	yes	438.32	yes
PVX_123800	PF3D7_1223400	phospholipid-transporting ATPase, putative	65	352.87	yes	150.9	yes	74.98	yes	34.36	yes	14.67	yes	32.9	yes	43.34	yes	211.78	yes	119.91	yes
PVX_123805	PF3D7_1223500	conserved Plasmodium protein, unknown function	32	21.96	yes	8.56	yes	6.9	yes	1.21	yes	2.1	yes	34.53	yes	35.82	yes	7.94	yes	21.27	yes
PVX_123845	PF3D7_1224300	polyadenylate-binding protein 1, putative	62	1875.9	yes	685.21	yes	499.54	yes	234.63	yes	24.1	yes	64.04	yes	56.72	yes	1532.9	yes	364.28	yes
PVX_124080	PF3D7_1229000	conserved Plasmodium membrane protein, unknown function	64	33.96	yes	6.2	yes	5.49	yes	0.47	no	1.24	yes	9.64	yes	0.84	no	14.43	yes	19.55	yes
PVX_169270
PVX_000010
Blue	no ortholog	22
Overall expression					143/166		131/166		140/166		122/166		138/166		144/166		135/166		131/166		142/166

## Sheet: P. yoelii - all stages
Analysis by PlasmoDB, based on DNA Microarray Assay
				Data Set: Liver, mosquito and blood stage expression profiles [M=log2(cy5/cy3)]
Input Ortholog(s)	Gene ID	Product Description	Ortholog count	Sporozoite	Stage Expression	Ookinete	Stage Expression	Liver stage (24h)	Stage Expression	Liver stage (40h)	Stage Expression	Liver stage (50h)	Stage Expression	Schizont	Stage Expression	Blood Stage	Stage Expression
PVX_001780	PY17X_0503600	peptidase, putative	60	1936.81	yes	2129.3	yes	3951.82	yes	2642.64	yes	3974.81	yes	3904.56	yes	2483.56	yes
PVX_001810	PY17X_0504300	eukaryotic translation initiation factor subunit eIF2A, putative	53	2671.81	yes	2531.9	yes	3548.12	yes	2590.82	yes	4454.31	yes	3996.22	yes	3007.6	yes
PVX_001835	PY17X_0504700	60S ribosomal protein L30e, putative	60	2916.54	yes	2445.1	yes	8657.24	yes	18776.5	yes	21181.9	yes	4301.72	yes	3610.12	yes
PVX_001895	PY17X_0506000	N-acetyltransferase, GNAT family, putative	58	3566.69	yes	2442.3	yes	5223.71	yes	3571.86	yes	9055.13	yes	7327.13	yes	4197.4	yes
PVX_001950
PVX_002590	PY17X_0316300	40S ribosomal protein S30, putative	47	0	no	0	no	0	no	0	no	0	no	0	no	0	no
PVX_002945	PY17X_0309100	tyrosine kinase-like protein, putative	49	1702.81	yes	2243.45	yes	2293.65	yes	1307.59	yes	2957.94	yes	1017.19	yes	1369.74	yes
PVX_003565	PY17X_0502100	early transcribed membrane protein	280	2491.92	yes	3071.7	yes	4693.94	yes	2646.82	yes	4833.38	yes	10727.4	yes	9966.54	yes
PVX_003570
PVX_003695	PY17X_0303600	conserved Plasmodium protein, unknown function	12	0	no	0	no	0	no	0	no	0	no	0	no	0	no
PVX_003810	PY17X_0305300	serine repeat antigen 5	492	2235.08	yes	2630.75	yes	4805.88	yes	1488.95	yes	1528.38	yes	774.94	yes	1531.42	yes
PVX_003905	PY17X_0306700	6-cysteine protein P230	61	2624.13	yes	2614.28	yes	3225.6	yes	2179.45	yes	3437.25	yes	2169.52	yes	2309.56	yes
PVX_003955	PY17X_0307600	60S ribosomal protein L37ae, putative	61	12964	yes	8178	yes	50227.2	yes	65535	yes	61455.8	yes	15992.2	yes	39512.2	yes
PVX_077695
PVX_080090	PY17X_1241200	heptatricopeptide repeat-containing protein, putative	60	2638	yes	2321.15	yes	2932.18	yes	4369.91	yes	8523.94	yes	2377.13	yes	2725.64	yes
PVX_080270	PY17X_1237700	CCR4 domain-containing protein 1	57	3267.5	yes	3476.85	yes	5807.06	yes	4721.64	yes	10739.4	yes	11462.4	yes	15615.2	yes
PVX_080275	PY17X_1237600	40S ribosomal protein S24, putative	61	5496.42	yes	10353.6	yes	39849	yes	41626.7	yes	54158.1	yes	19644.3	yes	30849.5	yes
PVX_080405	PY17X_0917200	50S ribosomal protein L2, putative	122	2121.12	yes	2289	yes	3975.94	yes	2877.32	yes	4334.25	yes	3090.44	yes	2950.68	yes
PVX_080660
PVX_081615
PVX_082480	PY17X_0108800	conserved Plasmodium protein, unknown function	443	2534.73	yes	2904.75	yes	2867.03	yes	1602.77	yes	3650.06	yes	5201.03	yes	2171.66	yes
PVX_082800	PY17X_1356300	zinc finger protein, putative	62	4726.5	yes	3545.95	yes	4367.26	yes	3845.18	yes	19012.6	yes	5542.44	yes	4905.62	yes
PVX_082840	PY17X_1357100	60S ribosomal protein L6, putative	61	3252.81	yes	3252.4	yes	18340.5	yes	31662.1	yes	58308.1	yes	10049.7	yes	14351.6	yes
PVX_082965	PY17X_1360000	60S ribosomal protein L18, putative	60	1427.5	yes	1702.55	yes	3270.85	yes	3883.59	yes	7782.63	yes	2307.84	yes	1985.98	yes
PVX_083000	PY17X_1360800	40S ribosomal protein S6, putative	60	2353.65	yes	3596.8	yes	14971.4	yes	20958	yes	47835.6	yes	15635.3	yes	17313.5	yes
PVX_083465	PY17X_1369900	60S ribosomal protein L17, putative	60	2132.92	yes	2049.45	yes	7336.18	yes	14120.7	yes	16978.2	yes	3463.22	yes	4094.06	yes
PVX_083555
PVX_083560
PVX_084160
PVX_084310	PY17X_0606800	tetratricopeptide repeat protein, putative	61	3712.08	yes	2474.4	yes	12967.2	yes	18792.3	yes	29983.2	yes	15631.1	yes	15129	yes
PVX_084325
PVX_084350
PVX_084795	PY17X_1011600	mitochondrial acidic protein MAM33, putative	61	2082.27	yes	1679.1	yes	14348.5	yes	21080.3	yes	34439.4	yes	6759.94	yes	10717	yes
PVX_084855	PY17X_1012900	DNA topoisomerase 2, putative	122	1375.46	yes	1831.45	yes	2756.24	yes	1992.36	yes	3422.81	yes	3425	yes	1588.52	yes
PVX_084865
PVX_084955	PY17X_1014600	60S ribosomal protein L14, putative	61	3892.23	yes	2144.45	yes	13029.9	yes	22311.8	yes	43396.4	yes	4599.53	yes	8058.56	yes
PVX_085030	PY17X_1016000	plasmepsin IX, putative	123	1836.04	yes	2201.25	yes	2937.85	yes	1412.5	yes	2355.38	yes	5314	yes	2293.82	yes
PVX_085270	PY17X_1020900	60S ribosomal protein L7-3, putative	61	5778	yes	4664.95	yes	19030.1	yes	23782.4	yes	39785.7	yes	23245.1	yes	31663.5	yes
PVX_085275	PY17X_1021000	60S ribosomal protein L5, putative	60	3130.85	yes	3335.7	yes	9427.68	yes	19267.9	yes	27372.6	yes	11040.5	yes	8458.68	yes
PVX_085310
PVX_085420	PY17X_1023900	40S ribosomal protein S25, putative	42	0	no	0	no	0	no	0	no	0	no	0	no	0	no
PVX_085735	PY17X_1030800	60S ribosomal protein L10, putative	61	2122.04	yes	2377.05	yes	41791.9	yes	38336.7	yes	59471.7	yes	20716	yes	23642.6	yes
PVX_085790
PVX_085800
PVX_085885
PVX_085890	PY17X_1033700	rhomboid protease ROM8, putative	60	1347.69	yes	1992.25	yes	2298.5	yes	1544.95	yes	1918.94	yes	2447.09	yes	1567.52	yes
PVX_086020	PY17X_1036300	40S ribosomal protein S8e, putative	60	4585	yes	2984.2	yes	25999.1	yes	37947.3	yes	50055.2	yes	21317.9	yes	32125.5	yes
PVX_086120	PY17X_1038400	transcription elongation factor SPT6, putative	67	1860.14	yes	2020.6	yes	2784.09	yes	1815.65	yes	4338.08	yes	1971.71	yes	1625.34	yes
PVX_087745
PVX_087860	PY17X_0806700	60S ribosomal protein L37, putative	58	1796.88	yes	2171.9	yes	19304.7	yes	24151.2	yes	52588.7	yes	16322.2	yes	15389.8	yes
PVX_087885
PVX_087950	PY17X_0808800	heat shock protein 90, putative	124	5362.01	yes	2513.5	yes	9450.78	yes	22376	yes	32218.4	yes	13823.4	yes	12074.8	yes
PVX_088065	PY17X_1224400	60S ribosomal protein L34, putative	61	6151.42	yes	4196.85	yes	27999.6	yes	32414.2	yes	60603.4	yes	26766	yes	33474.7	yes
PVX_089015	PY17X_0704000	ATP-dependent RNA helicase DBP10, putative	60	3249.81	yes	2567.8	yes	1128.29	yes	1483.23	yes	5137.44	yes	2255.66	yes	2003.3	yes
PVX_089055	PY17X_0704800	HECT-like E3 ubiquitin ligase	64	3541.47	yes	3096.57	yes	3862.87	yes	2074.48	yes	6424.29	yes	2330.71	yes	3244.96	yes
PVX_089280	PY17X_0709300	60S ribosomal protein L22, putative	60	2938.73	yes	3053.05	yes	6629.88	yes	10458.3	yes	18084.3	yes	4616.53	yes	3682.98	yes
PVX_089750	PY17X_0718000	60S ribosomal protein L15, putative	60	3309.42	yes	1940.85	yes	18117.1	yes	27716.7	yes	52952.4	yes	21699.3	yes	19681.9	yes
PVX_090155	PY17X_0420500	alpha tubulin 1	121	1846.35	yes	4806.15	yes	19139.9	yes	12835.6	yes	20450.2	yes	42180.7	yes	31524.1	yes
PVX_090160	PY17X_0524200	40S ribosomal protein S19, putative	60	2551.54	yes	2546.75	yes	13076.6	yes	27759.7	yes	35652.8	yes	7567.72	yes	7644.1	yes
PVX_090230
PVX_090930	PY17X_0944400	histone H4, putative	57	3255.81	yes	3515.55	yes	4605.82	yes	2367.18	yes	2615	yes	1799.81	yes	2578.92	yes
PVX_091145	PY17X_0939700	60S ribosomal protein L36, putative	61	1612.38	yes	2210.2	yes	6259.06	yes	16404.5	yes	15420.9	yes	2717.88	yes	3045.54	yes
PVX_091485	PY17X_0932900	ubiquitin carboxyl-terminal hydrolase UCH54, putative	61	2088.92	yes	2582.35	yes	3694.56	yes	3434.73	yes	7307.38	yes	3838.5	yes	4287.72	yes
PVX_091630	PY17X_0928000	conserved Plasmodium protein, unknown function	60	0	no	0	no	0	no	0	no	0	no	0	no	0	no
PVX_091635
PVX_091735
PVX_091865	PY17X_0925400	60S ribosomal protein L35, putative	61	3495.35	yes	3317.5	yes	10796.3	yes	25067.1	yes	47724.3	yes	9437.34	yes	9703.06	yes
PVX_091925	PY17X_0924100	40S ribosomal protein S18, putative	60	2573.42	yes	3122.55	yes	40418.5	yes	50734.4	yes	61260.6	yes	20214.1	yes	24550.9	yes
PVX_092120	PY17X_0919700	60S acidic ribosomal protein P0, putative	61	4119.35	yes	3007.1	yes	42487	yes	49895.2	yes	55105.3	yes	35639.8	yes	30650.4	yes
PVX_092335	PY17X_0915400	alpha/beta hydrolase, putative	59	3815.92	yes	2876.85	yes	3221.12	yes	1971.82	yes	2545.56	yes	1403.91	yes	2613.64	yes
PVX_092730	PY17X_0907900	60S ribosomal protein L28, putative	62	0	no	0	no	0	no	0	no	0	no	0	no	0	no
PVX_092735	PY17X_0907800	60S ribosomal protein L35ae, putative	59	2862.27	yes	2726.55	yes	16013.5	yes	29495.7	yes	48701.7	yes	10854.5	yes	11077.2	yes
PVX_092820	PY17X_0906100	60S ribosomal protein L41, putative	46	0	no	0	no	0	no	0	no	0	no	0	no	0	no
PVX_092995	PY17X_0525700	tryptophan-rich protein	617	2575.19	yes	2543.7	yes	9448.24	yes	3558.86	yes	6954.13	yes	30289.7	yes	6750.26	yes
PVX_094275
PVX_094305
PVX_094400	PY17X_1205500	60S ribosomal protein L13, putative	61	24111.7	yes	13114	yes	55017.8	yes	56511.1	yes	60190.2	yes	29432.8	yes	42521.5	yes
PVX_094600
PVX_094635	PY17X_1210100	tubulin beta chain, putative	59	1504.62	yes	2014.55	yes	2961.62	yes	2108.5	yes	2994.25	yes	1906.5	yes	2071.82	yes
PVX_094675	PY17X_1210700	ribonuclease, putative	62	1616	yes	1763.25	yes	2247.18	yes	1597	yes	3003.31	yes	1292.47	yes	1414.92	yes
PVX_094810	PY17X_1213400	PRE-binding protein, putative	60	4820.23	yes	4082.5	yes	9929	yes	5064.95	yes	28942.4	yes	26822.1	yes	18000.6	yes
PVX_095095	PY17X_0502100	early transcribed membrane protein	280	2491.92	yes	3071.7	yes	4693.94	yes	2646.82	yes	4833.38	yes	10727.4	yes	9966.54	yes
PVX_095190	PY17X_1220800	histone H2A.Z, putative	61	1868.68	yes	2181.12	yes	7438.5	yes	19575	yes	24344.1	yes	11634.8	yes	6704.71	yes
PVX_095350	PY17X_0810800	40S ribosomal protein S11, putative	122	2185.54	yes	2108.3	yes	14429.1	yes	26107.4	yes	43678	yes	7520.06	yes	8526.08	yes
PVX_096030
PVX_096035
PVX_096265	PY17X_0621800	40S ribosomal protein S5, putative	61	3523.31	yes	2692.8	yes	26449.5	yes	45554.9	yes	59439.8	yes	15023.9	yes	14240.1	yes
PVX_097575
PVX_097760	PY17X_1104500	60S ribosomal protein L31, putative	61	3409.81	yes	2450.75	yes	14524.6	yes	31076.7	yes	49393.8	yes	4600.44	yes	7964.82	yes
PVX_097915	PY17X_1107800	60S ribosomal protein L4, putative	61	6477.35	yes	5028.95	yes	25335.6	yes	20101.6	yes	44226.2	yes	42952.9	yes	39354.7	yes
PVX_097940	PY17X_1108300	protein CAF40, putative	60	2317.5	yes	2431.4	yes	3959.06	yes	3284	yes	5627.63	yes	4194.13	yes	2765.76	yes
PVX_098060	PY17X_1110700	conserved Plasmodium protein, unknown function	44	6748.4	yes	4835.28	yes	3196.31	yes	2359.92	yes	4447.27	yes	3606.05	yes	2616.66	yes
PVX_098585
PVX_098640	PY17X_0420300	60S ribosomal protein L32, putative	61	5271.46	yes	2516.35	yes	8229.71	yes	18259.4	yes	39020.1	yes	7668.31	yes	10214.8	yes
PVX_098700	PY17X_0419100	nucleoporin NUP221, putative	66	1868.73	yes	2000.95	yes	3998.56	yes	2442.91	yes	7153.56	yes	4619.44	yes	2111.72	yes
PVX_098705	PY17X_0419000	mitochondrial carrier protein, putative	61	2102.92	yes	2232.75	yes	3777.32	yes	2608.82	yes	8816.81	yes	2733.56	yes	2210.78	yes
PVX_098710	PY17X_0215400	dynein heavy chain, putative	378	1677.56	yes	2174.35	yes	2283.48	yes	1415.71	yes	1323.99	yes	2668.48	yes	1385.47	yes
PVX_098950	PY17X_0204600	bromodomain protein 3, putative	126	2566.42	yes	2487.5	yes	3085.29	yes	1966.55	yes	4923	yes	3305.22	yes	2512.92	yes
PVX_099510	PY17X_0826100	conserved Plasmodium protein, unknown function	58	0	no	0	no	0	no	0	no	0	no	0	no	0	no
PVX_099525	PY17X_0826400	S-adenosylmethionine synthetase, putative	61	1864	yes	2119.5	yes	4338.38	yes	2674.14	yes	5761.13	yes	8321.16	yes	3211.92	yes
PVX_099530	PY17X_0826600	para-aminobenzoic acid synthetase, putative	56	1888.73	yes	2126.6	yes	3565.53	yes	1703	yes	2785.63	yes	1791.78	yes	1667.62	yes
PVX_099930	PY17X_0833500	high molecular weight rhoptry protein 2	67	2148.54	yes	2475.7	yes	4719.09	yes	3079.89	yes	11500.2	yes	12910	yes	8396.27	yes
PVX_100005	PY17X_0201151	PIR protein	46	5165.69	yes	8944.23	yes	4243.04	yes	1890.31	yes	4503.77	yes	12389.7	yes	5622.52	yes
PVX_100625	PY17X_1450500	pentatricopeptide repeat domain-containing protein 2, putative	61	2537.58	yes	2689.3	yes	7780.65	yes	7693.68	yes	24118.3	yes	10203.4	yes	11482.5	yes
PVX_101035	PY17X_1458600	40S ribosomal protein S17, putative	56	2203.04	yes	2795.4	yes	30913.2	yes	33467.3	yes	58969.1	yes	20104.7	yes	25984.9	yes
PVX_101200	PY17X_1032500	actin II	122	2412.88	yes	2856.8	yes	3422.59	yes	2074.41	yes	4351	yes	2275.19	yes	2417.52	yes
PVX_101400	PY17X_1465600	osmiophilic body protein G377, putative	58	1854.96	yes	2500.95	yes	3105.81	yes	1584.93	yes	2416.72	yes	4346.53	yes	1895.26	yes
PVX_101555	PY17X_0717400	conserved Plasmodium protein, unknown function	72	2170.08	yes	2007.7	yes	3042.38	yes	1561.32	yes	3430.56	yes	3791.66	yes	1779.06	yes
PVX_110835
PVX_110915
PVX_111290
PVX_111330	PY17X_0513000	60S ribosomal protein L3, putative	60	2337.69	yes	2559.6	yes	12377.9	yes	19634.4	yes	33557	yes	22471.5	yes	19410.5	yes
PVX_111355	PY17X_0512500	peroxiredoxin, putative	58	30553.7	yes	10571.4	yes	14623.7	yes	5369	yes	22124.2	yes	48519.4	yes	33568.8	yes
PVX_113265	PY17X_0102400	zinc finger protein, putative	63	1778.27	yes	1974.25	yes	2884.38	yes	1594.09	yes	5314	yes	5924.91	yes	2297.32	yes
PVX_113295	PY17X_0103000	SAC3 domain-containing protein, putative	60	2992.46	yes	2295.2	yes	2593.15	yes	2656.82	yes	9290	yes	3816.06	yes	3391.38	yes
PVX_113665	PY17X_0110400	histone H3, putative	121	3249.54	yes	2213.7	yes	9305.97	yes	15608.7	yes	38781.8	yes	13006.2	yes	5786.58	yes
PVX_113780	PY17X_0112700	6-cysteine protein P12p, putative	59	4368.88	yes	1956.65	yes	2358.62	yes	2657.82	yes	7880.5	yes	2582.16	yes	1785.34	yes
PVX_113850	PY17X_0114100	major facilitator superfamily-related transporter, putative	61	2288.35	yes	2380.7	yes	4455.53	yes	2888.32	yes	3830.44	yes	9580.22	yes	2445.96	yes
PVX_113860	PY17X_1232700	60S ribosomal protein L19, putative	60	2703.08	yes	3536.25	yes	8400.59	yes	17551.5	yes	34930.3	yes	4899.53	yes	11480.1	yes
PVX_113995	PY17X_1117800	AP-2 complex subunit alpha, putative	62	2453.46	yes	2453.4	yes	4230.41	yes	2357.18	yes	4580.13	yes	2441.84	yes	2495.32	yes
PVX_114015	PY17X_1118100	histone H2A, putative	62	5550.92	yes	4523.5	yes	58746	yes	52366.6	yes	53304.6	yes	51867.2	yes	41537.7	yes
PVX_114040	PY17X_1118600	ribosomal protein L27a, putative	62	2720.31	yes	3222.3	yes	33909.6	yes	41327.8	yes	59186.3	yes	24780.6	yes	29339	yes
PVX_114370	PY17X_0302300	5'-3' exonuclease, putative	117	1569.23	yes	2128.75	yes	2299.26	yes	2159.23	yes	2997.06	yes	1461.88	yes	1896.28	yes
PVX_114480	PY17X_1127700	protein DJ-1, putative	61	1824.04	yes	2293.45	yes	7937.24	yes	19244	yes	25622.5	yes	8843	yes	10658.6	yes
PVX_114515	PY17X_1128500	choline/ethanolaminephosphotransferase, putative	60	1515.88	yes	2052.7	yes	4538.88	yes	2709	yes	6684	yes	7223.59	yes	2833.92	yes
PVX_114830	PY17X_1134800	elongation factor 1-alpha, putative	115	1395.33	yes	1806.45	yes	3166.63	yes	7675.05	yes	7819.28	yes	8394.02	yes	5510.06	yes
PVX_114910	PY17X_1136600	40S ribosomal protein S15, putative	61	2433.88	yes	2293.7	yes	20087.7	yes	35431.9	yes	53881.4	yes	9378.91	yes	8989.02	yes
PVX_114990	PY17X_1138200	guanylyl cyclase beta	56	1738.77	yes	2072.87	yes	2993.17	yes	1665.52	yes	2196.21	yes	2027.2	yes	1830.99	yes
PVX_115255	PY17X_1143100	ubiquitin-60S ribosomal protein L40, putative	62	13988.4	yes	5579.75	yes	9912.29	yes	30215.3	yes	46317.4	yes	16239.8	yes	10880.8	yes
PVX_115275	PY17X_1143500	conserved Plasmodium protein, unknown function	51	1892.32	yes	2041.45	yes	3268.62	yes	2108.3	yes	3915.9	yes	2695.45	yes	2430.84	yes
PVX_115460
PVX_116655	PY17X_1344200	conserved Plasmodium protein, unknown function	64	2787.01	yes	2742.27	yes	3491.6	yes	1988.33	yes	5074.02	yes	2615.49	yes	3196.83	yes
PVX_116700	PY17X_1343300	60S ribosomal protein L23, putative	60	2733.65	yes	3399.5	yes	9876	yes	16274.5	yes	33907.1	yes	9271.03	yes	14870.7	yes
PVX_116715	PY17X_1343000	60S ribosomal protein L6, putative	60	2342.96	yes	2237.35	yes	11701.3	yes	25005.9	yes	49533.2	yes	11980.2	yes	12391.2	yes
PVX_116915	PY17X_1339000	exported protein 2, putative	61	2322.77	yes	3379.65	yes	4152.18	yes	4327.18	yes	3478.38	yes	5567.81	yes	9344.88	yes
PVX_117060	PY17X_1336100	MORC family protein, putative	61	4800.04	yes	4427.8	yes	3526.32	yes	2607.09	yes	7143.19	yes	3542.38	yes	4953.26	yes
PVX_117135	PY17X_1334700	enkurin domain-containing protein, putative	63	2062.81	yes	2504.6	yes	3142.59	yes	1461.68	yes	4090.38	yes	1756.25	yes	1642.42	yes
PVX_117390	PY17X_1328800	40S ribosomal protein S28e, putative	61	12386.7	yes	4533.3	yes	16033.3	yes	38250.7	yes	50477.5	yes	10463.5	yes	12109	yes
PVX_117420	PY17X_1328200	60S ribosomal protein L27, putative	60	3024.12	yes	2267.3	yes	23073.2	yes	28312.7	yes	50856.4	yes	11151.9	yes	11562.5	yes
PVX_117440	PY17X_1327800	60S ribosomal protein L29, putative	58	0	no	0	no	0	no	0	no	0	no	0	no	0	no
PVX_117570
PVX_117685	PY17X_1323100	ferlin, putative	59	2574.77	yes	2638.05	yes	2934.53	yes	1779.95	yes	2668.44	yes	3104.31	yes	3116.88	yes
PVX_118145	PY17X_1314600	40S ribosomal protein S5, putative	60	2968.85	yes	2674.8	yes	22217.7	yes	33473.4	yes	47129.6	yes	20727.6	yes	29724.2	yes
PVX_118230	PY17X_1312800	ATP-dependent RNA helicase MAK5, putative	63	6250.46	yes	4988.6	yes	2882.5	yes	1768.05	yes	2378.31	yes	1858.16	yes	1880.5	yes
PVX_118340
PVX_118345	PY17X_1310600	Sec7 domain-containing protein ARFGEF, putative	38	2193.96	yes	2313.2	yes	3120.26	yes	1708.18	yes	3878.63	yes	1797.06	yes	2408.1	yes
PVX_118625	PY17X_1304900	trailer hitch homolog, putative	60	2117.65	yes	2384.35	yes	3327.59	yes	1606.73	yes	2223.38	yes	1478.97	yes	1719.02	yes
PVX_118695
PVX_119225
PVX_119250	PY17X_0403300	serine/threonine protein kinase, putative	63	2283.58	yes	2871.65	yes	2924.65	yes	1663.55	yes	3445.5	yes	1555.44	yes	1925.92	yes
PVX_119345	PY17X_0405200	60S ribosomal protein L44, putative	62	1747.27	yes	1984	yes	8219.09	yes	21495.4	yes	28723	yes	2532.84	yes	4644.64	yes
PVX_119470	PY17X_0407500	40S ribosomal protein S23, putative	61	1700.85	yes	2480.5	yes	12562	yes	38175	yes	40266.6	yes	7521.06	yes	10216.5	yes
PVX_119765
PVX_121965	PY17X_1211800	DNA2/NAM7 helicase, putative	125	2046.06	yes	2266.38	yes	3828.49	yes	2384.25	yes	5700.72	yes	4273.17	yes	2700.91	yes
PVX_122030
PVX_122285	PY17X_1409300	60S ribosomal protein L24, putative	60	1814.77	yes	3528.7	yes	15794.1	yes	22135.5	yes	52925.4	yes	13380.2	yes	18191	yes
PVX_122465	PY17X_1413000	protein AAP2, putative	26	1844.19	yes	1825.05	yes	3651.44	yes	2396.59	yes	3763.5	yes	2642.78	yes	1822.16	yes
PVX_123060	PY17X_1425300	DNA/RNA-binding protein Alba 1, putative	60	3349.42	yes	4099.05	yes	24495.1	yes	25666.9	yes	26697.5	yes	35004.4	yes	36206.2	yes
PVX_123070	PY17X_1425500	60S ribosomal protein L13-2, putative	63	2918.12	yes	3704.6	yes	24164.6	yes	27022	yes	47302.6	yes	22896.3	yes	32133.1	yes
PVX_123075	PY17X_1425600	40S ribosomal protein S16, putative	61	3090.19	yes	2634.4	yes	8380.68	yes	28443.6	yes	32294.6	yes	4360.66	yes	5582.8	yes
PVX_123800	PY17X_1440800	phospholipid-transporting ATPase, putative	65	3902.46	yes	2474.9	yes	5157.79	yes	4094	yes	9567.06	yes	14399.6	yes	7302.76	yes
PVX_123805	PY17X_1441700	polyadenylate-binding protein 1	62	4725.27	yes	4417.15	yes	19107.6	yes	7883.09	yes	19951.1	yes	52952.1	yes	18942.8	yes
PVX_123845
PVX_124080	PY17X_1446100	conserved Plasmodium protein, unknown function	64	2238.77	yes	2389.05	yes	2977.62	yes	1744.59	yes	2159.19	yes	1212.25	yes	1697.46	yes
PVX_169270
PVX_000010
Blue	no ortholog	40
Overall expression					118/166		118/166		118/166		118/166		118/166		118/166		118/166

## Sheet: P. bergheii - all stages
Analysis by PlasmoDB, based on RNAseq Transcriptomes
				Data Set: Ex-erythrocytic stage transcriptomes (sporozoite, liver time course and detached cells) - TPM										Data Set: 5 asexual and sexual stage transcriptomes - TPM
Input Ortholog(s)	source_id	Product Description	Ortholog count	Liver 6h	Stage Expression	Liver 24h	Stage Expression	Liver 48h	Stage Expression	Liver 54h	Stage Expression	Liver 60h	Stage Expression	Trophozoite	Stage Expression	Schizont	Stage Expression	Gametocyte	Stage Expression	Ookinete	Stage Expression	Ring	Stage Expression
PVX_001780	PBANKA_0502600.1	peptidase, putative	60	61.35	yes	45.48	yes	105.78	yes	198.82	yes	139.74	yes	102.9	yes	214.23	yes	18.98	yes	26.71	yes	71.84	yes
PVX_001810	PBANKA_0503200.1	eukaryotic translation initiation factor subunit eIF2A, putative	53	31.7	yes	30.77	yes	79.19	yes	103.37	yes	91.84	yes	124.92	yes	200.37	yes	21.44	yes	31.87	yes	49.32	yes
PVX_001835	PBANKA_0503600.1	60S ribosomal protein L30e, putative	60	2231.36	yes	3558.57	yes	1585.01	yes	1366.86	yes	616.59	yes	1520.82	yes	383.78	yes	347.36	yes	622.36	yes	2312.93	yes
PVX_001895	PBANKA_0504900.1	N-acetyltransferase, GNAT family, putative	58	47.83	yes	42.19	yes	27.25	yes	13.93	yes	22.72	yes	75.84	yes	40.21	yes	9.44	yes	61.16	yes	52.62	yes
PVX_001950
PVX_002590	PBANKA_0315600.1	40S ribosomal protein S30, putative	47	4199.59	yes	7629.7	yes	3644.2	yes	3382.95	yes	2326.76	yes	2413.41	yes	2048.29	yes	347.3	yes	2063.58	yes	2514.17	yes
PVX_002945	PBANKA_0308500.1	tyrosine kinase-like protein, putative	50	75.38	yes	53.12	yes	45.43	yes	33.74	yes	25.71	yes	80.74	yes	25.23	yes	26.58	yes	102.06	yes	95.64	yes
PVX_003565	PBANKA_0501100.1	early transcribed membrane protein	285	106.12	yes	14.24	yes	84.12	yes	77.63	yes	65.48	yes	924.37	yes	479.8	yes	324.4	yes	70.45	yes	306.1	yes
PVX_003570
PVX_003695	PBANKA_0303000.1	conserved Plasmodium protein, unknown function	12	0	no	0.97	no	6.7	yes	7.58	yes	11.38	yes	3.43	yes	24.55	yes	42.99	yes	5.94	yes	6.44	yes
PVX_003810	PBANKA_0304700.1	serine repeat antigen 5	492	6.7	yes	2.3	yes	7.93	yes	5.76	yes	7.93	yes	3.44	yes	0	no	1.15	yes	6.24	yes	1	yes
PVX_003905	PBANKA_0306100.1	6-cysteine protein P230	61	3.5	yes	0.47	no	4.37	yes	2.78	yes	4.53	yes	2.76	yes	3.37	yes	12.19	yes	1.6	yes	2.34	yes
PVX_003955	PBANKA_0307000.1	60S ribosomal protein L37ae, putative	61	4309.97	yes	7159.47	yes	3023.25	yes	2552.93	yes	1265.25	yes	2685.77	yes	1772.97	yes	596.66	yes	1773.96	yes	3918.9	yes
PVX_077695
PVX_080090	PBANKA_1238000.1	heptatricopeptide repeat-containing protein, putative	60	22.15	yes	13.53	yes	16.91	yes	13.38	yes	12.71	yes	46.25	yes	22.99	yes	17.11	yes	6.31	yes	8.71	yes
PVX_080270	PBANKA_1234300.1	CCR4 domain-containing protein 1, putative	57	54.64	yes	37.45	yes	51.11	yes	59.92	yes	49.47	yes	57.09	yes	153.26	yes	18.59	yes	13.08	yes	45.44	yes
PVX_080275	PBANKA_1234200.1	40S ribosomal protein S24, putative	61	2802.94	yes	5101.31	yes	2057.24	yes	1991.49	yes	1138.04	yes	2631.44	yes	1422.16	yes	542.39	yes	3091.29	yes	5005.25	yes
PVX_080405	PBANKA_0915700.1	50S ribosomal protein L2, putative	122	49.89	yes	62.8	yes	150.42	yes	132.2	yes	104.07	yes	62.38	yes	13.87	yes	14.13	yes	16.99	yes	31.2	yes
PVX_080660
PVX_081615
PVX_082480	PBANKA_0311700.1	rhoptry neck protein 6, putative	444	42.01	yes	194.94	yes	208.12	yes	189.27	yes	333.22	yes	122.06	yes	822.6	yes	7.65	yes	34.06	yes	48.89	yes
PVX_082800	PBANKA_1351200.1	zinc finger protein, putative	62	37.31	yes	40.49	yes	72.08	yes	56.46	yes	35.58	yes	165.45	yes	118.96	yes	21.93	yes	47.07	yes	119.73	yes
PVX_082840	PBANKA_1351900.1	60S ribosomal protein L6, putative	61	724.62	yes	1131.02	yes	429.02	yes	295.61	yes	159.7	yes	1038.19	yes	220.38	yes	168.26	yes	448.98	yes	1472.39	yes
PVX_082965	PBANKA_1354400.1	60S ribosomal protein L18, putative	60	2655.45	yes	6565.41	yes	2451.16	yes	2092.04	yes	919.09	yes	2450.73	yes	1080.36	yes	466.74	yes	1087.92	yes	3346.56	yes
PVX_083000	PBANKA_1355100.1	40S ribosomal protein S6, putative	60	1332.59	yes	2988.07	yes	1140.59	yes	817.15	yes	395.35	yes	2145.75	yes	463.31	yes	388.89	yes	608.28	yes	3798.16	yes
PVX_083465	PBANKA_1364200.1	60S ribosomal protein L17, putative	60	2388.97	yes	3612.95	yes	1627.08	yes	1219.68	yes	632.11	yes	1545.88	yes	420.43	yes	390.39	yes	1241.06	yes	2509.05	yes
PVX_083555
PVX_083560
PVX_084160	PBANKA_0601200.1	dynein heavy chain, putative	57	2.97	yes	1.73	yes	2.79	yes	1.83	yes	2.78	yes	1.66	yes	11.74	yes	6.85	yes	3.37	yes	1.53	yes
PVX_084310	PBANKA_0604300.1	tetratricopeptide repeat protein, putative	61	134.51	yes	743.8	yes	680.12	yes	818.23	yes	385.14	yes	1065.3	yes	617.87	yes	558.81	yes	207.6	yes	224.15	yes
PVX_084325
PVX_084350
PVX_084795	PBANKA_1010000.1	mitochondrial acidic protein MAM33, putative	61	640.98	yes	1215.17	yes	570.43	yes	292.36	yes	89.89	yes	740.62	yes	73.49	yes	43.43	yes	151.59	yes	296.41	yes
PVX_084855	PBANKA_1011400.1	DNA topoisomerase 2, putative	122	5.96	yes	22.9	yes	43.65	yes	35.62	yes	46.85	yes	115.18	yes	157.77	yes	67.56	yes	11.61	yes	22.76	yes
PVX_084865
PVX_084955	PBANKA_1013100.1	60S ribosomal protein L14, putative	61	1711.56	yes	3585.5	yes	1223.38	yes	958.24	yes	530.35	yes	1677.41	yes	177.63	yes	367.7	yes	1346.52	yes	2679.81	yes
PVX_085030	PBANKA_1014500.1	plasmepsin IX, putative	123	7.93	yes	0.61	no	15.8	yes	35.96	yes	215.99	yes	4.66	yes	596.3	yes	51.35	yes	56.97	yes	26.08	yes
PVX_085270	PBANKA_1019400.1	60S ribosomal protein L7-3, putative	61	2413.01	yes	3313.12	yes	1523.21	yes	1158.75	yes	581.91	yes	1723.81	yes	1304.71	yes	280.31	yes	1937.9	yes	2771.39	yes
PVX_085275	PBANKA_1019500.1	60S ribosomal protein L5, putative	60	1545.57	yes	3301.78	yes	1326.22	yes	952.94	yes	542.87	yes	1490.92	yes	505.91	yes	388.04	yes	1369.49	yes	2046.28	yes
PVX_085310
PVX_085420	PBANKA_1022000.1	40S ribosomal protein S25, putative	43	4155.91	yes	5642.99	yes	2646.91	yes	2063.72	yes	1132.21	yes	3095.97	yes	1666.28	yes	657.8	yes	3454.55	yes	4130.67	yes
PVX_085735	PBANKA_1028400.1	60S ribosomal protein L10, putative	61	1698.54	yes	3036.7	yes	1454.03	yes	1101.6	yes	495.89	yes	1868.44	yes	591.57	yes	337.2	yes	854.55	yes	1817.51	yes
PVX_085790
PVX_085800
PVX_085885	PBANKA_1031200.1	DnaJ protein, putative	56	6.95	yes	31.95	yes	63.69	yes	82.2	yes	56.55	yes	59.66	yes	106.01	yes	40.52	yes	17.83	yes	49.68	yes
PVX_085890	PBANKA_1031300.1	rhomboid protease ROM8	60	25.82	yes	20.32	yes	26.65	yes	36.16	yes	44.57	yes	72.01	yes	321.06	yes	78.68	yes	39.84	yes	86.2	yes
PVX_086020	PBANKA_1033900.1	40S ribosomal protein S8e, putative	60	2700.15	yes	4514.81	yes	1678.26	yes	1298.49	yes	735.71	yes	2341.17	yes	997.53	yes	469.58	yes	2487.02	yes	4196.71	yes
PVX_086120	PBANKA_1036000.1	transcription elongation factor SPT6, putative	67	21.27	yes	61.54	yes	99.1	yes	91.38	yes	71.01	yes	284.62	yes	142.99	yes	17.5	yes	28.82	yes	80.57	yes
PVX_087745
PVX_087860	PBANKA_0804000.1	60S ribosomal protein L37, putative	58	2164.22	yes	3851.17	yes	1681.31	yes	1454.65	yes	765.32	yes	1698.67	yes	1049.56	yes	244.59	yes	797.47	yes	2350.16	yes
PVX_087885
PVX_087950	PBANKA_0805700.1	heat shock protein 90	124	2390.66	yes	6485.94	yes	4228.88	yes	2520.08	yes	1198.52	yes	4824.79	yes	734.92	yes	407.39	yes	1443.11	yes	1984.06	yes
PVX_088065	PBANKA_1221200.1	60S ribosomal protein L34, putative	61	1195.81	yes	2419.76	yes	982.84	yes	861.46	yes	512.26	yes	2530.97	yes	1267.65	yes	406.8	yes	3076.21	yes	4511.56	yes
PVX_089015	PBANKA_0703700.1	ATP-dependent RNA helicase DBP10, putative	60	49.73	yes	52.75	yes	51.34	yes	42	yes	46.94	yes	88.06	yes	73.71	yes	29.38	yes	173.28	yes	98.05	yes
PVX_089055	PBANKA_0704500.1	HECT-like E3 ubiquitin ligase, putative	64	56.85	yes	79.26	yes	86.83	yes	74.79	yes	43.8	yes	132.76	yes	38.52	yes	2.36	yes	4.8	yes	21.41	yes
PVX_089280	PBANKA_0709100.1	60S ribosomal protein L22, putative	60	1215.62	yes	2390.84	yes	1001.28	yes	828.12	yes	390.8	yes	1334.01	yes	635.34	yes	292.45	yes	730.57	yes	2256.38	yes
PVX_089750	PBANKA_0717800.1	60S ribosomal protein L15, putative	60	1851.17	yes	2756.26	yes	1106.5	yes	796.25	yes	528.54	yes	1864.75	yes	654.34	yes	284.96	yes	758.7	yes	2701.97	yes
PVX_090155	PBANKA_0417700.1	alpha tubulin 1	121	110.58	yes	514.37	yes	794.99	yes	755.18	yes	533.13	yes	156.43	yes	409.52	yes	152.61	yes	53.81	yes	137.05	yes
PVX_090160	PBANKA_0522800.1	40S ribosomal protein S19, putative	60	1764.8	yes	2780.03	yes	1101.22	yes	1032.28	yes	602.36	yes	1505.89	yes	483.61	yes	337.83	yes	1695.59	yes	2299.09	yes
PVX_090230	PBANKA_0501100.1	early transcribed membrane protein	285	106.12	yes	14.24	yes	84.12	yes	77.63	yes	65.48	yes	924.37	yes	479.8	yes	324.4	yes	70.45	yes	306.1	yes
PVX_090930	PBANKA_0941900.1	histone H4, putative	57	2548.87	yes	9875.84	yes	18706.7	yes	29481.8	yes	37311.9	yes	904.25	yes	10860.3	yes	3030.85	yes	3330.96	yes	2474.87	yes
PVX_091145	PBANKA_0937700.1	60S ribosomal protein L36, putative	61	1188.43	yes	3246.96	yes	1495.69	yes	1206.88	yes	617.35	yes	2971.93	yes	1100.85	yes	635.93	yes	2772.84	yes	5655.06	yes
PVX_091485	PBANKA_0930900.1	ubiquitin carboxyl-terminal hydrolase UCH54, putative	61	16.2	yes	52.14	yes	117.19	yes	114.7	yes	65.97	yes	193.55	yes	199.2	yes	74.12	yes	17.8	yes	51.18	yes
PVX_091630
PVX_091635
PVX_091735	PBANKA_0926000.1	conserved Plasmodium protein, unknown function	60	0	no	9.41	yes	49.05	yes	31.98	yes	20.48	yes	38.74	yes	13.2	yes	10.94	yes	52.05	yes	13.24	yes
PVX_091865	PBANKA_0923400.1	60S ribosomal protein L35, putative	61	3386.29	yes	5137.46	yes	1896.36	yes	1327.05	yes	857.46	yes	2139.41	yes	557.77	yes	394.47	yes	1485.44	yes	3522.99	yes
PVX_091925	PBANKA_0922100.1	40S ribosomal protein S18, putative	60	4005.86	yes	5086.57	yes	2456.92	yes	1827.95	yes	981.64	yes	1387.5	yes	621.71	yes	356.13	yes	793.38	yes	2050.49	yes
PVX_092120	PBANKA_0918000.1	60S acidic ribosomal protein P0, putative	61	2311.96	yes	3727.17	yes	2107.61	yes	1480.21	yes	758.81	yes	1578.8	yes	676.61	yes	266.63	yes	2176.68	yes	1790.82	yes
PVX_092335	PBANKA_0913900.1	alpha/beta hydrolase, putative	59	23.57	yes	12.82	yes	32.56	yes	35.04	yes	37.53	yes	40.99	yes	193.17	yes	17.93	yes	17.24	yes	23.8	yes
PVX_092730	PBANKA_0906500.1	60S ribosomal protein L28, putative	62	1100.06	yes	3089.99	yes	1412.64	yes	1369.07	yes	664.11	yes	1752.91	yes	658.78	yes	367.32	yes	1298.55	yes	3846.37	yes
PVX_092735	PBANKA_0906400.1	60S ribosomal protein L35ae, putative	59	1204.6	yes	2812.3	yes	1353.62	yes	959.62	yes	578.64	yes	1212.67	yes	516.45	yes	233.12	yes	466.01	yes	1680.5	yes
PVX_092820	PBANKA_0904700.1	60S ribosomal protein L41, putative	46	5256.38	yes	10347.6	yes	4627.75	yes	2897.21	yes	1275.85	yes	6659.1	yes	2207.82	yes	1182.28	yes	3818.16	yes	4706.61	yes
PVX_092995	PBANKA_0524300.1	tryptophan-rich protein IPIS2	617	74.24	yes	22.79	yes	95.64	yes	180.21	yes	268.62	yes	660.52	yes	1217.66	yes	315.21	yes	231.42	yes	2300.26	yes
PVX_094275
PVX_094305
PVX_094400	PBANKA_1202400.1	60S ribosomal protein L13, putative	61	2616.85	yes	4226.32	yes	1556.99	yes	1286.44	yes	996.37	yes	1894.92	yes	709.8	yes	330.74	yes	2059.57	yes	2653.64	yes
PVX_094600
PVX_094635	PBANKA_1206900.1	tubulin beta chain, putative	59	212.39	yes	513.44	yes	1351.91	yes	1328.12	yes	907.57	yes	897.43	yes	1261.02	yes	877.4	yes	107.74	yes	208.14	yes
PVX_094675	PBANKA_1207500.1	ribonuclease, putative	62	17.04	yes	11.78	yes	12.63	yes	5.9	yes	5.94	yes	54.86	yes	0	no	23.16	yes	3.02	yes	18.65	yes
PVX_094810	PBANKA_1210200.1	PRE-binding protein, putative	60	340.76	yes	402.71	yes	257.22	yes	147.88	yes	105.28	yes	863.45	yes	378.16	yes	942.07	yes	213.87	yes	932.03	yes
PVX_095095
PVX_095190	PBANKA_1217600.1	histone H2A.Z, putative	61	953.86	yes	2344.11	yes	2467.26	yes	3895.22	yes	7120.13	yes	638.24	yes	8652.97	yes	242.86	yes	1188.85	yes	950.58	yes
PVX_095350	PBANKA_0807600.1	40S ribosomal protein S11, putative	122	1492.37	yes	2792.48	yes	1234.38	yes	922.19	yes	501.77	yes	1508.66	yes	774.67	yes	353.86	yes	1803.78	yes	2348.72	yes
PVX_096030
PVX_096035
PVX_096265	PBANKA_0619100.1	40S ribosomal protein S5, putative	61	2832.28	yes	4842.17	yes	1943.1	yes	1398.37	yes	641.78	yes	2008.08	yes	738.92	yes	297.74	yes	654.93	yes	2040.23	yes
PVX_097575	PBANKA_1442200.1	protein SOC2	8	37.25	yes	61.6	yes	124.68	yes	134.26	yes	87.16	yes	157.33	yes	179.07	yes	22.56	yes	16.13	yes	13.26	yes
PVX_097760	PBANKA_1103400.1	60S ribosomal protein L31, putative	61	5214.01	yes	6371.18	yes	3078.91	yes	2543.4	yes	1453.61	yes	1825.64	yes	387.34	yes	585.94	yes	883.7	yes	2272.96	yes
PVX_097915	PBANKA_1106700.1	60S ribosomal protein L4, putative	61	2086.85	yes	3460.19	yes	1627.67	yes	1042.88	yes	653.6	yes	1853.14	yes	530.24	yes	171.11	yes	952.95	yes	2837.5	yes
PVX_097940	PBANKA_1107200.1	protein CAF40, putative	60	74.05	yes	50.1	yes	64.32	yes	78.38	yes	88.98	yes	93.25	yes	102.83	yes	45.05	yes	68.89	yes	58.17	yes
PVX_098060	PBANKA_1109600.1	conserved Plasmodium protein, unknown function	44	14.33	yes	0.82	no	10.37	yes	5.78	yes	7.29	yes	14.21	yes	75.97	yes	125.52	yes	16.48	yes	26.32	yes
PVX_098585
PVX_098640	PBANKA_0417500.1	60S ribosomal protein L32, putative	61	1685.42	yes	4046.48	yes	2290.24	yes	1673.72	yes	859.48	yes	1402.07	yes	492.97	yes	240	yes	1361.52	yes	1977.01	yes
PVX_098700	PBANKA_0416300.1	nucleoporin NUP221	68	73.4	yes	52.2	yes	112.09	yes	115.47	yes	82.67	yes	29.41	yes	62.59	yes	13.59	yes	24.36	yes	29.61	yes
PVX_098705	PBANKA_0416200.1	mitochondrial carrier protein, putative	61	36.36	yes	36.05	yes	54.79	yes	38.08	yes	47.81	yes	81.09	yes	17.03	yes	24.37	yes	67.02	yes	54.13	yes
PVX_098710	PBANKA_0214000.1	dynein heavy chain, putative	380	1.91	yes	0.16	no	12.04	yes	19.56	yes	16.03	yes	1.47	yes	15.62	yes	7.24	yes	0.86	no	0.83	no
PVX_098950	PBANKA_1226100.1	conserved Plasmodium protein, unknown function	128	43.93	yes	33.61	yes	45.79	yes	47.21	yes	40.27	yes	104.2	yes	79.43	yes	6.01	yes	16.25	yes	17.34	yes
PVX_099510	PBANKA_0822800.1	conserved Plasmodium protein, unknown function	58	48.72	yes	169.59	yes	116.79	yes	97.61	yes	98.08	yes	386.26	yes	147.22	yes	161.69	yes	369.63	yes	629.62	yes
PVX_099525	PBANKA_0823100.1	S-adenosylmethionine synthetase, putative	61	208.17	yes	197.78	yes	107.93	yes	51.5	yes	315.75	yes	151.61	yes	253.74	yes	1218	yes	1060.06	yes	343.17	yes
PVX_099530	PBANKA_0823300.1	para-aminobenzoic acid synthetase, putative	56	26.39	yes	14.05	yes	31.96	yes	28.5	yes	19.36	yes	78.92	yes	53.48	yes	52.21	yes	30.25	yes	25.61	yes
PVX_099930	PBANKA_0830200.1	high molecular weight rhoptry protein 2	67	38.51	yes	16.47	yes	403.45	yes	1062.51	yes	620.12	yes	747.5	yes	1313.8	yes	47.9	yes	21.33	yes	191.57	yes
PVX_100005	PBANKA_0831500.1	regulator of chromosome condensation, putative	46	10.3	yes	6.63	yes	17.54	yes	14.45	yes	11.69	yes	58.91	yes	7.83	yes	5.36	yes	3.32	yes	3.84	yes
PVX_100625	PBANKA_1448000.1	pentatricopeptide repeat domain-containing protein 2, putative	61	74.68	yes	96.54	yes	70.02	yes	46.26	yes	24.55	yes	205.08	yes	23.18	yes	53.98	yes	34.8	yes	23	yes
PVX_101035	PBANKA_1456100.1	40S ribosomal protein S17, putative	56	3504.79	yes	6454.58	yes	2749.74	yes	2117.08	yes	984.2	yes	2251.01	yes	774.67	yes	418.86	yes	756.57	yes	4219.93	yes
PVX_101200	PBANKA_1030100.1	actin II	122	0	no	191.74	yes	95.76	yes	42.52	yes	49.39	yes	125.9	yes	86.3	yes	197.26	yes	10.3	yes	27.79	yes
PVX_101400	PBANKA_1463000.1	osmiophilic body protein G377	58	5.22	yes	1.27	yes	2.43	yes	1.71	yes	3.6	yes	24.73	yes	162.24	yes	42.63	yes	16.37	yes	6.06	yes
PVX_101555	PBANKA_0717200.1	conserved Plasmodium protein, unknown function	72	5.49	yes	8.4	yes	27.95	yes	35.28	yes	29.5	yes	51.28	yes	171.5	yes	35.4	yes	22.9	yes	26.26	yes
PVX_110835
PVX_110915
PVX_111290
PVX_111330	PBANKA_0511900.1	60S ribosomal protein L3, putative	60	1064.41	yes	2762.24	yes	1163.44	yes	844.84	yes	494.52	yes	1232.86	yes	312.27	yes	119.4	yes	398.37	yes	1453.63	yes
PVX_111355	PBANKA_0511400.1	peroxiredoxin, putative	58	310.46	yes	97.18	yes	144.84	yes	727.29	yes	2401.72	yes	105.81	yes	12657	yes	236.5	yes	958.66	yes	1001.37	yes
PVX_113265	PBANKA_0100800.1	zinc finger protein, putative	63	17	yes	15.78	yes	18.79	yes	23.17	yes	23.08	yes	25.23	yes	67.22	yes	85.31	yes	11.62	yes	23.01	yes
PVX_113295	PBANKA_0101400.1	SAC3 domain-containing protein, putative	60	24.29	yes	39.7	yes	87.7	yes	116.3	yes	94.92	yes	93.41	yes	116.01	yes	23.46	yes	20.24	yes	39.75	yes
PVX_113665	PBANKA_0108800.1	histone H3	121	289.78	yes	477.98	yes	617.24	yes	1947.45	yes	2674.76	yes	104.71	yes	2680.26	yes	839.41	yes	380.16	yes	221.55	yes
PVX_113780	PBANKA_0111100.1	6-cysteine protein P12p, putative	59	85.59	yes	73.48	yes	107.58	yes	75.24	yes	167.28	yes	54	yes	170.05	yes	18.01	yes	212.93	yes	38.46	yes
PVX_113850	PBANKA_0112500.1	major facilitator superfamily-related transporter, putative	61	22.68	yes	11.65	yes	67.91	yes	71.09	yes	140.36	yes	65.23	yes	85.21	yes	15.1	yes	56.02	yes	69.21	yes
PVX_113860	PBANKA_1229200.1	60S ribosomal protein L19, putative	60	3162.29	yes	3995.59	yes	1735.31	yes	1345.09	yes	741.77	yes	2570.45	yes	770.39	yes	357.86	yes	1180.8	yes	4326.38	yes
PVX_113995	PBANKA_1116700.1	AP-2 complex subunit alpha, putative	62	7.93	yes	7.71	yes	16.39	yes	33.79	yes	38.62	yes	40.7	yes	85.59	yes	23.6	yes	72.33	yes	63.77	yes
PVX_114015	PBANKA_1117000.1	histone H2A, putative	62	2192.17	yes	5170.61	yes	8771.78	yes	13899.6	yes	16803.2	yes	715.02	yes	11550.7	yes	1273.28	yes	1065.74	yes	1012.65	yes
PVX_114040	PBANKA_1117500.1	ribosomal protein L27a, putative	62	3724.84	yes	3902.86	yes	1700.54	yes	1320.04	yes	789.81	yes	1894.65	yes	623.9	yes	928.17	yes	1622.61	yes	2808.67	yes
PVX_114370	PBANKA_0301700.1	5'-3' exonuclease, putative	117	10.62	yes	10.54	yes	40.79	yes	44.18	yes	33.43	yes	64.37	yes	51.19	yes	48.53	yes	27.6	yes	10.77	yes
PVX_114480	PBANKA_1126200.1	protein DJ-1, putative	61	190.87	yes	431.15	yes	349.33	yes	345.42	yes	153.39	yes	849.17	yes	220.17	yes	158.73	yes	37.8	yes	156.9	yes
PVX_114515	PBANKA_1127000.1	choline/ethanolaminephosphotransferase	60	390.93	yes	470.75	yes	584.19	yes	835.24	yes	2094.84	yes	896.84	yes	1343.3	yes	108.94	yes	318.51	yes	1009.28	yes
PVX_114830	PBANKA_1133300.1	elongation factor 1-alpha	115	651.34	yes	1195.86	yes	589.09	yes	330.4	yes	145.38	yes	1399.68	yes	261.71	yes	50.57	yes	8.14	yes	2125.72	yes
PVX_114910	PBANKA_1135100.1	40S ribosomal protein S15, putative	61	1767.86	yes	3509.62	yes	1550.5	yes	1247.45	yes	660.9	yes	1380.71	yes	428.11	yes	226.04	yes	507.85	yes	1362.39	yes
PVX_114990	PBANKA_1136700.1	guanylyl cyclase beta	56	4.53	yes	0.63	no	7.08	yes	7.44	yes	11.42	yes	4.95	yes	17.01	yes	29.24	yes	5.24	yes	3.45	yes
PVX_115255	PBANKA_1141700.1	ubiquitin-60S ribosomal protein L40, putative	62	3555.75	yes	3756.8	yes	1908.97	yes	1749.62	yes	1996.86	yes	2427.28	yes	1801.57	yes	704.47	yes	1897.46	yes	2249.09	yes
PVX_115275	PBANKA_1142100.1	conserved Plasmodium protein, unknown function	51	21.05	yes	18.73	yes	28.34	yes	30.59	yes	27.78	yes	36.94	yes	44.39	yes	7.09	yes	6.98	yes	21.36	yes
PVX_115460
PVX_116655
PVX_116700	PBANKA_1338600.1	60S ribosomal protein L23, putative	60	1445.24	yes	2891.03	yes	1273.79	yes	1165.98	yes	779.13	yes	2316.95	yes	1379.09	yes	431.69	yes	2037.76	yes	5093.17	yes
PVX_116715	PBANKA_1338300.1	60S ribosomal protein L6, putative	60	844.55	yes	1691.72	yes	877.88	yes	743.92	yes	377.77	yes	1260.13	yes	486.71	yes	122.17	yes	728.38	yes	1190.01	yes
PVX_116915	PBANKA_1334300.1	exported protein 2	61	747.66	yes	749.31	yes	638.87	yes	367.88	yes	1573.82	yes	1237.76	yes	654.17	yes	52.93	yes	105.22	yes	1363.75	yes
PVX_117060	PBANKA_1331400.1	MORC family protein, putative	61	120.71	yes	116.97	yes	148.16	yes	159.09	yes	148.71	yes	304.06	yes	435.75	yes	19.08	yes	14.86	yes	121.49	yes
PVX_117135	PBANKA_1330000.1	enkurin domain-containing protein, putative	63	0	no	5.15	yes	8.22	yes	6.31	yes	7	yes	9.05	yes	67.85	yes	231.98	yes	177.06	yes	57.78	yes
PVX_117390	PBANKA_1325000.1	40S ribosomal protein S28e, putative	61	2926.86	yes	3397.26	yes	1440.19	yes	1106.57	yes	1042.55	yes	1974.19	yes	1093.66	yes	1299.74	yes	2016.06	yes	3046.1	yes
PVX_117420	PBANKA_1324400.1	60S ribosomal protein L27, putative	60	1691.39	yes	2498.58	yes	1126.7	yes	982.12	yes	568.05	yes	1607.19	yes	158.1	yes	434.15	yes	1873.68	yes	2891.89	yes
PVX_117440	PBANKA_1324000.1	60S ribosomal protein L29, putative	58	2421.42	yes	4030.34	yes	1860.84	yes	1460.81	yes	771.07	yes	2051.87	yes	664.01	yes	477.47	yes	1136.27	yes	2478.76	yes
PVX_117570
PVX_117685	PBANKA_1319300.1	ferlin, putative	59	1.04	yes	3.98	yes	49.08	yes	77.12	yes	77.38	yes	6.25	yes	90.61	yes	3.91	yes	4.4	yes	11.52	yes
PVX_118145	PBANKA_1310800.1	40S ribosomal protein S5, putative	60	2229.39	yes	3551.3	yes	1789.98	yes	1255.06	yes	672.2	yes	1408.37	yes	341.77	yes	228.83	yes	1342.13	yes	2170.05	yes
PVX_118230	PBANKA_1309000.1	ATP-dependent RNA helicase MAK5, putative	63	33.51	yes	35.01	yes	45.22	yes	36.98	yes	37.88	yes	65.86	yes	74.07	yes	10.99	yes	169.64	yes	83.01	yes
PVX_118340	PBANKA_1306900.1	serine/threonine protein kinase, putative	53	1.49	yes	12.53	yes	79	yes	110.57	yes	73.78	yes	19.63	yes	42.06	yes	24.67	yes	3.04	yes	6.33	yes
PVX_118345
PVX_118625	PBANKA_1301300.1	trailer hitch homolog	60	118.24	yes	60.75	yes	91.99	yes	66.62	yes	43.51	yes	148.81	yes	68.76	yes	234.02	yes	19.66	yes	51.64	yes
PVX_118695
PVX_119225
PVX_119250	PBANKA_0401100.1	serine/threonine protein kinase, putative	63	26.89	yes	53.02	yes	110.2	yes	84.92	yes	45.76	yes	147.43	yes	88.91	yes	40.87	yes	47.79	yes	57.44	yes
PVX_119345	PBANKA_0403000.1	60S ribosomal protein L44, putative	62	2731.16	yes	4875.63	yes	2450.51	yes	2031.66	yes	1076.86	yes	1566.69	yes	1072.63	yes	265.99	yes	979.02	yes	2204.31	yes
PVX_119470	PBANKA_0405300.1	40S ribosomal protein S23, putative	61	590.43	yes	556.29	yes	313.61	yes	228.77	yes	127.88	yes	1640.03	yes	350.2	yes	273.15	yes	708.76	yes	1819.88	yes
PVX_119765	PBANKA_0411100.1	conserved Plasmodium protein, unknown function	55	23.95	yes	48.46	yes	61.51	yes	40.57	yes	31.26	yes	79.72	yes	35.11	yes	18.34	yes	11.62	yes	61.79	yes
PVX_121965	PBANKA_1208600.1	DNA2/NAM7 helicase, putative	125	14	yes	23.96	yes	20.47	yes	15.73	yes	13.59	yes	32.65	yes	5.81	yes	14.54	yes	10.84	yes	26.23	yes
PVX_122030
PVX_122285	PBANKA_1407600.1	60S ribosomal protein L24, putative	60	3711.21	yes	5028.12	yes	2647.7	yes	2234.27	yes	1266.47	yes	2912.49	yes	1757.19	yes	542.16	yes	627.39	yes	3597.07	yes
PVX_122465	PBANKA_1411200.1	protein AAP2, putative	26	28.32	yes	27.28	yes	45.87	yes	98.91	yes	147.94	yes	109.8	yes	249.67	yes	21.54	yes	18.21	yes	19.15	yes
PVX_123060	PBANKA_1423300.1	DNA/RNA-binding protein Alba 1, putative	60	2361.43	yes	5998.73	yes	2975.92	yes	2085.36	yes	1040.26	yes	5278.86	yes	1549.35	yes	809.56	yes	2064.76	yes	6943.2	yes
PVX_123070	PBANKA_1423500.1	60S ribosomal protein L13-2, putative	63	2354.77	yes	3504.99	yes	1230.65	yes	907.23	yes	471.17	yes	2356.46	yes	581.01	yes	274.23	yes	2591.68	yes	4240.7	yes
PVX_123075	PBANKA_1423600.1	40S ribosomal protein S16, putative	61	2254.56	yes	3793.49	yes	1598.89	yes	1143.03	yes	537.61	yes	1261.71	yes	224.39	yes	230.12	yes	698.32	yes	1808.81	yes
PVX_123800	PBANKA_1438300.1	phospholipid-transporting ATPase, putative	65	67.33	yes	54.67	yes	85.18	yes	104.48	yes	100.24	yes	279.24	yes	368.02	yes	33.37	yes	43.22	yes	136.81	yes
PVX_123805
PVX_123845	PBANKA_1439200.1	polyadenylate-binding protein 1, putative	62	578.52	yes	698.68	yes	681.67	yes	503.89	yes	795.8	yes	2207.75	yes	1692.22	yes	489.32	yes	1974.78	yes	2373.67	yes
PVX_124080	PBANKA_1443600.1	conserved Plasmodium protein, unknown function	64	2.63	yes	9.74	yes	14.86	yes	8.24	yes	5.16	yes	22.36	yes	9.27	yes	7.83	yes	17.82	yes	19.21	yes
PVX_169270																					no		no
PVX_000010
Blue	no ortholog	37
Overall expression					125/166		123/166		129/166		129/166		129/166		129/166		127/166		129/166		127/166		127/166

## Sheet: P. cynomolgi - all stages
Analysis by PlasmoDB, based on RNAseq Transcriptomes
				Data Set: Hypnozoite, schizont and blood stage transcriptomes (TPM)						Data Set: Liver stage hypnozoite vs schizont transcriptomes (TPM)
Input Ortholog(s)	Gene ID	Product Description	Ortholog count	Hypnozoite	Stage Expression	Liver schizont	Stage Expression	Blood stage	Stage Expression	sporozoite	Stage Expression	hypnozoite	Stage Expression
PVX_001780	PcyM_0603700	conserved Plasmodium protein, unknown function	60	0	no	47.14	yes	14.8	yes	91.83	yes	49.56	yes
PVX_001810	PcyM_0604400	eukaryotic translation initiation factor subunit eIF2A, putative	53	53.15	yes	30.07	yes	12.12	yes	50.17	yes	22.26	yes
PVX_001835	PcyM_0604900	60S ribosomal protein L30e, putative	60	3636.07	yes	3129.55	yes	1742.09	yes	2255.7	yes	2092.39	yes
PVX_001895	PcyM_0607000	histone acetyltransferase, putative	58	0	no	25.7	yes	14.35	yes	51	yes	36.71	yes
PVX_001950	PcyM_0608700	conserved Plasmodium protein, unknown function	20	20.01	yes	6.32	yes	4.03	yes	9.88	yes	6.43	yes
PVX_002590	PcyM_0402800	40S ribosomal protein S30, putative	47	0	no	417.61	yes	142.45	yes	94.22	yes	126.27	yes
PVX_002945	PcyM_0411300	tyrosine kinase-like protein, putative	50	0	no	42.08	yes	13.39	yes	52.21	yes	33	yes
PVX_003565	PcyM_0326400	early transcribed membrane protein	285	0	no	8.82	yes	594.57	yes	45.46	yes	6.15	yes
PVX_003570
PVX_003695
PVX_003810	PcyM_0416000	serine-repeat antigen 2 (SERA)	485	0	no	0.04	no	1.3	yes	6.08	yes	1.21	yes
PVX_003905	PcyM_0414300	transmission-blocking target antigen s230, putative	61	0	no	0.5	no	110.92	yes	0.92	no	1.26	yes
PVX_003955	PcyM_0413100	60S ribosomal protein L37ae, putative	61	0	no	492.71	yes	359.88	yes	271.7	yes	371.74	yes
PVX_077695	PcyM_0008800	PIR protein	12	0	no	0	no	16.99	yes	0.17	no	0	no
PVX_080090	PcyM_1008600	conserved Plasmodium protein, unknown function	60	0	no	53.97	yes	22.54	yes	135.04	yes	51.37	yes
PVX_080270	PcyM_1012400	carbon catabolite repressor protein 4, putative	57	17.58	yes	23.72	yes	8.87	yes	30.72	yes	13.89	yes
PVX_080275	PcyM_1012500	40S ribosomal protein S24, putative	61	2148.8	yes	2649.75	yes	4190.09	yes	2343.41	yes	2063.4	yes
PVX_080405	PcyM_0937600	50S ribosomal protein L2, putative	122	0	no	383.77	yes	154.59	yes	264.95	yes	196.61	yes
PVX_080660
PVX_081615	PcyM_0215300	conserved Plasmodium protein, unknown function	45	2.47	yes	39.79	yes	38.14	yes	101.84	yes	58.46	yes
PVX_082480	PcyM_0108200	rhoptry-associated membrane antigen, putative	444	0	no	1.22	yes	9.45	yes	86.75	yes	28.74	yes
PVX_082800	PcyM_1220000	conserved Plasmodium protein, unknown function	62	241.65	yes	70.22	yes	38.17	yes	91.38	yes	47.35	yes
PVX_082840	PcyM_1218900	60S ribosomal protein L6-2, putative	61	151.18	yes	840.06	yes	1219.46	yes	1001.2	yes	670.5	yes
PVX_082965	PcyM_1215600	60S ribosomal protein L18a, putative	60	2728.83	yes	3271.71	yes	2527.51	yes	1967.69	yes	1804.25	yes
PVX_083000	PcyM_1214800	40S ribosomal protein S6, putative	60	2831.75	yes	1088.17	yes	1127.66	yes	1020.77	yes	771.83	yes
PVX_083465	PcyM_1204700	60S ribosomal protein L17, putative	60	417.82	yes	262.07	yes	739.44	yes	380.08	yes	233.56	yes
PVX_083555	PcyM_1202900	conserved Plasmodium protein, unknown function	15	0	no	0	no	5687.97	yes	2.61	yes	0	no
PVX_083560	PcyM_1202800	Plasmodium exported protein, unknown function	41	0	no	0	no	1371.64	yes	2.15	yes	0	no
PVX_084160	PcyM_1302100	dynein heavy chain, putative	57	36.32	yes	6.67	yes	20.01	yes	9.19	yes	6.76	yes
PVX_084310	PcyM_1305800	conserved Plasmodium protein, unknown function	61	62.12	yes	309.54	yes	539.82	yes	499.68	yes	318.68	yes
PVX_084325
PVX_084350
PVX_084795	PcyM_1316800	mitochondrial acidic protein MAM33, putative	61	546.14	yes	623.87	yes	841.9	yes	692.55	yes	521.4	yes
PVX_084855	PcyM_1318100	DNA topoisomerase II, putative	122	4.84	yes	49.73	yes	38.22	yes	71.21	yes	16.21	yes
PVX_084865
PVX_084955	PcyM_1320400	60S ribosomal protein L14, putative	61	414.19	yes	1672.4	yes	1462.77	yes	1665.48	yes	1392.57	yes
PVX_085030	PcyM_0113200	plasmepsin X, putative	123	0	no	16.57	yes	55.85	yes	32.16	yes	18.06	yes
PVX_085270	PcyM_1328700	60S ribosomal protein L7-3, putative	61	112.73	yes	1173.91	yes	688.08	yes	1069.67	yes	877.39	yes
PVX_085275	PcyM_1329000	60S ribosomal protein L5, putative	60	1812.97	yes	1711.39	yes	847.07	yes	1742.38	yes	1178.41	yes
PVX_085310
PVX_085420	PcyM_1332600	40S ribosomal protein S25, putative	43	7832.89	yes	4178.81	yes	2092.91	yes	2257.37	yes	2121.06	yes
PVX_085735	PcyM_1340600	60S ribosomal protein L10, putative	61	1379	yes	481.91	yes	260.54	yes	393.67	yes	398.47	yes
PVX_085790
PVX_085800	PcyM_1342100	conserved Plasmodium protein, unknown function	12	0	no	1.49	yes	86.34	yes	0.89	no	0	no
PVX_085885	PcyM_1344100	conserved Plasmodium protein, unknown function	56	0	no	71.02	yes	26.88	yes	66.87	yes	46.41	yes
PVX_085890	PcyM_1344200	rhomboid protease ROM8, putative	60	97.85	yes	51.87	yes	34.67	yes	79.38	yes	36.47	yes
PVX_086020	PcyM_1347700	40S ribosomal protein S8e, putative	60	2870.25	yes	2559.09	yes	2440.53	yes	1928.53	yes	1756.58	yes
PVX_086120	PcyM_1349800	conserved Plasmodium protein, unknown function	67	327.39	yes	50.61	yes	23.88	yes	61.05	yes	30.34	yes
PVX_087745
PVX_087860	PcyM_0107300	60S ribosomal protein L37, putative	58	743.59	yes	575.04	yes	624.35	yes	435.44	yes	340.72	yes
PVX_087885
PVX_087950	PcyM_0109400	heat shock protein 90, putative	124	1719.16	yes	1655.56	yes	802.35	yes	1875.98	yes	979.27	yes
PVX_088065	PcyM_0112100	60S ribosomal protein L34, putative	61	6.97	yes	2243.46	yes	1350.11	yes	1784.27	yes	1205.48	yes
PVX_089015	PcyM_0506400	ATP-dependent RNA helicase DBP10, putative	60	1.3	yes	33.66	yes	19.38	yes	77.44	yes	37.45	yes
PVX_089055	PcyM_0507300	E3 ubiquitin-protein ligase, putative	64	7.86	yes	22.23	yes	8.83	yes	29.27	yes	12.21	yes
PVX_089280	PcyM_0512100	60S ribosomal protein L22, putative	60	42.84	yes	1874.67	yes	1396.2	yes	1650.82	yes	1709.9	yes
PVX_089750	PcyM_0524100	60S ribosomal protein L15, putative	60	0	no	652.08	yes	592.99	yes	616.24	yes	559.12	yes
PVX_090155	PcyM_0532100	alpha tubulin 2, putative	121	0	no	278.5	yes	1323.32	yes	334.42	yes	228.02	yes
PVX_090160	PcyM_0532200	40S ribosomal protein S19, putative	60	0	no	455.76	yes	189.44	yes	266.9	yes	187.33	yes
PVX_090230	PcyM_0326400	early transcribed membrane protein	285	0	no	8.82	yes	594.57	yes	45.46	yes	6.15	yes
PVX_090930	PcyM_0906800	histone H4, putative	57	145009	yes	30967.5	yes	42398.8	yes	37835.5	yes	38015.3	yes
PVX_091145	PcyM_0911900	60S ribosomal protein L36, putative	61	3974.21	yes	3006.2	yes	1219.19	yes	2638.43	yes	1813.06	yes
PVX_091485	PcyM_0919700	ubiquitin C-terminal hydrolase, family 1, putative	61	102.26	yes	158.51	yes	65.95	yes	213.32	yes	138.64	yes
PVX_091630
PVX_091635
PVX_091735	PcyM_0925500	conserved Plasmodium protein, unknown function	60	0	no	24.02	yes	32.05	yes	56.5	yes	60.63	yes
PVX_091865	PcyM_0928900	60S ribosomal protein L35, putative	61	420.32	yes	755.63	yes	1096.98	yes	786.42	yes	491.3	yes
PVX_091925	PcyM_0930500	40S ribosomal protein S18, putative	60	521.35	yes	900.5	yes	1918.21	yes	1105.6	yes	1019.12	yes
PVX_092120	PcyM_0934700	60S ribosomal protein P0, putative	61	1861.33	yes	1541.95	yes	977.9	yes	1912.61	yes	1261	yes
PVX_092335	PcyM_0939300	alpha/beta hydrolase, putative	59	107.02	yes	32.28	yes	7.5	yes	31.11	yes	11.78	yes
PVX_092730	PcyM_0947150	60S ribosomal protein L28, putative	62	1861.55	yes	533.88	yes	1213.76	yes	538.22	yes	814.07	yes
PVX_092735	PcyM_0947200	60S ribosomal protein L35ae, putative	59	1408.66	yes	3744.31	yes	3041.86	yes	1124.37	yes	1297.46	yes
PVX_092820	PcyM_0949100	60S ribosomal protein L41, putative	46	5709.62	yes	3097.68	yes	3158.23	yes	1638.97	yes	2485.83	no
PVX_092995	PcyM_0012600	tryptophan-rich antigen	589	0	no	0	no	379.64	yes	0	no	0	yes
PVX_094275	PcyM_0423700	hypothetical protein	6	24.72	yes	0.07	no	624.8	yes	0.71	no	3.01	yes
PVX_094305
PVX_094400	PcyM_0803400	60S ribosomal protein L13, putative	61	2560.99	yes	1998.55	yes	2349.91	yes	1416.25	yes	1401.2	yes
PVX_094600	PcyM_0807700	zinc finger protein, putative	38	118.9	yes	49.08	yes	28.07	yes	37	yes	18.91	yes
PVX_094635	PcyM_0808300	tubulin beta chain, putative	59	614.17	yes	742.01	yes	2308.52	yes	746.24	yes	589.77	yes
PVX_094675	PcyM_0809200	small subunit rRNA synthesis-associated protein, putative	62	0	no	70.56	yes	18.97	yes	131.9	yes	80.91	yes
PVX_094810	PcyM_0812100	PRE-binding protein, putative	60	174.18	yes	221.75	yes	131.23	yes	343.5	yes	175.25	yes
PVX_095095	PcyM_0530100	zinc finger protein, putative	70	29.85	yes	15.86	yes	17.2	yes	17.79	yes	5.23	yes
PVX_095190	PcyM_0820800	histone H2A variant, putative	61	1476.9	yes	3207.05	yes	2025.82	yes	3801.46	yes	3944.18	yes
PVX_095350	PcyM_0824300	40S ribosomal protein S11, putative	122	0	no	407.8	yes	430.22	yes	286.55	yes	280.68	no
PVX_096030	PcyM_0326850	hypothetical protein	4	0	no	0	no	242.12	yes	1.56	yes	0	no
PVX_096035	PcyM_1030300	60S ribosomal protein L31, putative	61	2076.24	yes	3474.4	yes	3389.37	yes	2501.57	yes	2208.73	yes
PVX_096265	PcyM_1026900	60S ribosomal protein L4, putative	61	1481.93	yes	814.39	yes	756.26	yes	1217.09	yes	702.81	yes
PVX_097575	PcyM_1026400	cell differentiation protein, putative	60	0	no	48.38	yes	5.23	yes	57.82	yes	59.95	yes
PVX_097760	PcyM_1023300	conserved Plasmodium protein, unknown function	44	0	no	1.04	yes	25.03	yes	1.78	yes	1.68	yes
PVX_097915	PcyM_0700500	reticulocyte binding protein 1a	51	38.2	yes	0.44	no	19.78	yes	10.22	yes	2.35	yes
PVX_097940	PcyM_0701600	60S ribosomal protein L32, putative	61	651.93	yes	2721.79	yes	5596.7	yes	1549.65	yes	3063.6	yes
PVX_098060
PVX_098585
PVX_098640
PVX_098700	PcyM_0702800	nucleoporin NUP100/NSP100, putative	68	6.95	yes	18.14	yes	4.97	yes	39.2	yes	23.31	yes
PVX_098705	PcyM_0702900	mitochondrial carrier protein, putative	61	0	no	24.6	yes	12.04	yes	43.53	yes	16.45	no
PVX_098710	PcyM_0047700	PIR protein	380	0	no	0	no	13.52	yes	0	no	0	yes
PVX_098950	PcyM_0118100	conserved Plasmodium protein, unknown function	125	27.45	yes	19.3	yes	6.47	yes	20.93	yes	11.24	yes
PVX_099510	PcyM_0720700	conserved Plasmodium protein, unknown function	58	673.85	yes	71.54	yes	50.26	yes	163.81	yes	91.65	yes
PVX_099525	PcyM_0721000	S-adenosylmethionine synthetase, putative	61	5.3	yes	549.64	yes	185.3	yes	1174.2	yes	932.7	yes
PVX_099530	PcyM_0721200	para-aminobenzoic acid synthetase, putative	56	0	no	12.66	yes	16.01	yes	30.36	yes	36.33	yes
PVX_099930	PcyM_0730100	high molecular weight rhoptry protein 2, putative	67	2.13	yes	47.13	yes	7.51	yes	116.73	yes	96.94	yes
PVX_100005	PcyM_0731700	conserved Plasmodium protein, unknown function	46	38.48	yes	14.71	yes	3.9	yes	26.05	yes	13.74	yes
PVX_100625	PcyM_1456500	pentatricopeptide repeat protein, putative	61	0	no	69.6	yes	15.15	yes	67.99	yes	42.12	yes
PVX_101035	PcyM_1466000	40S ribosomal protein S17, putative	56	3240.24	yes	3420.5	yes	2595.11	yes	2712.93	yes	2087.81	yes
PVX_101200	PcyM_1342600	actin II, putative	122	0	no	80.51	yes	171.85	yes	143.18	yes	68.11	yes
PVX_101400	PcyM_1474100	osmiophilic body protein, putative	58	2.26	yes	11.21	yes	215.19	yes	11.84	yes	7.81	yes
PVX_101555	PcyM_0523200	conserved Plasmodium protein, unknown function	72	0	no	10.38	yes	8.37	yes	19.62	yes	13.6	yes
PVX_110835	PcyM_0628100	Plasmodium exported protein, unknown function	37	257.34	yes	1.28	yes	178.27	yes	2.97	yes	1.48	yes
PVX_110915	PcyM_0617400	merozoite TRAP-like protein, putative	42	0	no	28.97	yes	137.89	yes	48.7	yes	24.37	yes
PVX_111290	PcyM_0616200	60S ribosomal protein L3, putative	60	676.98	yes	1039.41	yes	872.13	yes	1048.53	yes	805.45	yes
PVX_111330
PVX_111355	PcyM_0615700	merozoite capping protein 1, putative	58	1480.97	yes	589.42	yes	521.65	yes	1121.86	yes	569.1	yes
PVX_113265	PcyM_1150200	conserved Plasmodium protein, unknown function	63	88.33	yes	33.23	yes	23.29	yes	41.91	yes	19.47	yes
PVX_113295	PcyM_1149500	SAC3/GNAP family-related protein, putative	60	0	no	33.91	yes	13.41	yes	66	yes	25.84	yes
PVX_113665	PcyM_1132800	histone H3 variant, putative	121	8062.7	yes	6351.09	yes	3987.64	yes	10431.7	yes	9878.13	yes
PVX_113780	PcyM_1138400	6-cysteine protein	59	51.35	yes	135.97	yes	17.49	yes	149.74	yes	90.18	yes
PVX_113850	PcyM_1136400	major facilitator superfamily-related transporter, putative	61	0.61	no	19.05	yes	16.19	yes	26.83	yes	12.71	yes
PVX_113860	PcyM_1136200	60S ribosomal protein L19, putative	60	3113.93	yes	2195.64	yes	1897.67	yes	1691.62	yes	1205.58	yes
PVX_113995	PcyM_1133500	AP-2 complex subunit alpha, putative	62	0	no	17.71	yes	7.82	yes	37.97	yes	29.1	yes
PVX_114015	PcyM_1133000	histone H2A, putative	62	5802.47	yes	4884.7	yes	1433.7	yes	4729.73	yes	5910.8	yes
PVX_114040	PcyM_1132400	60S ribosomal protein L27a, putative	62	5785.41	yes	3549.71	yes	3258.98	yes	2882.98	yes	2274	yes
PVX_114370	PcyM_0421100	5'-3' exonuclease, N-terminal resolvase-like domain, putative	117	31.37	yes	121.69	yes	36.18	yes	104.7	yes	41.9	yes
PVX_114480	PcyM_1122700	protein DJ-1, putative	61	394.29	yes	1886.22	yes	1779.15	yes	985.79	yes	683.19	yes
PVX_114515	PcyM_1121800	choline/ethanolaminephosphotransferase, putative	60	0	no	552.45	yes	180.01	yes	569.77	yes	455.13	yes
PVX_114830	PcyM_1114600	elongation factor 1-alpha, putative	115	711.07	yes	1601.49	yes	849.68	yes	2178.76	yes	1449.23	yes
PVX_114910	PcyM_1112800	40S ribosomal protein S15, putative	61	2757.7	yes	5701.25	yes	4622.29	yes	2853.64	yes	3611.64	no
PVX_114990	PcyM_1111100	guanylyl cyclase beta, putative	56	0	no	1.89	yes	8.99	yes	2.68	yes	0.78	yes
PVX_115255	PcyM_1105400	ubiquitin-60S ribosomal protein L40, putative	62	2136.95	yes	2967.44	yes	2443.19	yes	1950.76	yes	1338.11	yes
PVX_115275	PcyM_1105000	conserved Plasmodium protein, unknown function	51	4.75	yes	16.61	yes	12.03	yes	25.58	yes	10.43	no
PVX_115460	PcyM_1100500	Plasmodium exported protein, unknown function	13	0	no	0	no	217.23	yes	0.62	no	0	yes
PVX_116655	PcyM_1234900	conserved Plasmodium protein, unknown function	64	10	yes	10.81	yes	7.4	yes	13.95	yes	4.09	yes
PVX_116700	PcyM_1235900	60S ribosomal protein L23, putative	60	1293.52	yes	3748.09	yes	1065.05	yes	2295.01	yes	2199.99	yes
PVX_116715	PcyM_1236300	60S ribosomal protein L9, putative	60	5135.11	yes	2346.08	yes	2844.66	yes	2163.6	yes	1597.14	yes
PVX_116915	PcyM_1240800	exported protein 2, putative	61	0	no	176.91	yes	287.17	yes	292.36	yes	149.27	yes
PVX_117060	PcyM_1244100	conserved Plasmodium protein, unknown function	61	79.9	yes	45.72	yes	24.91	yes	61.75	yes	25.8	no
PVX_117135	PcyM_1246200	conserved Plasmodium protein, unknown function	63	3.89	yes	0.71	no	86.68	yes	5.09	yes	0	yes
PVX_117390	PcyM_1251800	40S ribosomal protein S28e, putative	61	4363.46	yes	3933.2	yes	4881.05	yes	4183.43	yes	3306.88	yes
PVX_117420	PcyM_1252500	60S ribosomal protein L27, putative	60	555.64	yes	1924.6	yes	3259.61	yes	1758.35	yes	2224.22	yes
PVX_117440	PcyM_1253000	60S ribosomal protein L29, putative	58	667.52	yes	659.47	yes	1251.3	yes	278.16	yes	708.87	yes
PVX_117570	PcyM_1255500	conserved Plasmodium protein, unknown function	34	32.26	yes	8.65	yes	4.42	yes	10.74	yes	12.7	no
PVX_117685	PcyM_1257900	ferlin, putative	59	0	no	3.42	yes	3.42	yes	4.05	yes	0.65	yes
PVX_118145	PcyM_1268800	40S ribosomal protein S5, putative	60	456.13	yes	349.88	yes	150.76	yes	308.2	yes	186.75	yes
PVX_118230	PcyM_1270600	RNA helicase, putative	63	50.85	yes	33.33	yes	39.58	yes	61.67	yes	44.19	yes
PVX_118340	PcyM_1272900	serine/threonine protein kinase, putative	53	2.38	yes	12.36	yes	13.82	yes	34.61	yes	26.7	yes
PVX_118345	PcyM_1273000	protein transport protein SEC7, putative	38	73.98	yes	25.25	yes	7.66	yes	44.4	yes	14.19	yes
PVX_118625	PcyM_1279300	trailer hitch homolog, putative	60	0	no	47.57	yes	117.37	yes	133.11	yes	92.16	yes
PVX_118695
PVX_119225	PcyM_0842500	Plasmodium exported protein, unknown function	7	0	no	1.18	yes	627.6	yes	1.18	yes	4.65	yes
PVX_119250	PcyM_0842000	serine/threonine protein kinase, putative	63	73.33	yes	95.2	yes	62.94	yes	123.16	yes	85.33	yes
PVX_119345	PcyM_0839900	60S ribosomal protein L44, putative	62	2673.17	yes	2209.89	yes	2190.62	yes	1683.66	yes	1451.09	yes
PVX_119470	PcyM_0837300	40S ribosomal protein S23, putative	61	13701.7	yes	7673.98	yes	3269.16	yes	4984.03	yes	3518.08	yes
PVX_119765	PcyM_0829100	conserved Plasmodium protein, unknown function	55	110.43	yes	26.81	yes	10.52	yes	25.54	yes	23.22	yes
PVX_121965	PcyM_0810400	DNA2/NAM7 helicase, putative	125	0	no	35.43	yes	15.28	yes	54.59	yes	26.71	yes
PVX_122030	PcyM_1405300	conserved Plasmodium protein, unknown function	43	25.84	yes	10.01	yes	6.77	yes	19.74	yes	9.44	yes
PVX_122285	PcyM_1410700	60S ribosomal protein L24, putative	60	409.19	yes	763.23	yes	525.53	yes	636.02	yes	915.34	yes
PVX_122465
PVX_123060	PcyM_1427300	DNA/RNA-binding protein Alba 1, putative	60	2803.26	yes	1540.84	yes	1546.91	yes	2545.39	yes	1704.07	yes
PVX_123070	PcyM_1427500	60S ribosomal protein L13, putative	63	1175.56	yes	1864.34	yes	1878.45	yes	1664.05	yes	1728.23	yes
PVX_123075	PcyM_1427600	40S ribosomal protein S16, putative	61	1276.48	yes	2456.99	yes	1880.34	yes	1533.23	yes	1818.85	yes
PVX_123800	PcyM_1443700	phospholipid-transporting ATPase, putative	65	177.65	yes	61.11	yes	25.17	yes	110.81	yes	39.73	yes
PVX_123805	PcyM_1443900	conserved Plasmodium protein, unknown function	32	13.94	yes	21.09	yes	2.88	yes	29.41	yes	10.86	yes
PVX_123845	PcyM_1444700	polyadenylate-binding protein, putative	62	16.88	yes	83.51	yes	36.7	yes	145.76	yes	65.27	yes
PVX_124080	PcyM_1450900	conserved Plasmodium protein, unknown function	64	0	no	20.98	yes	5.71	yes	30.37	yes	12.7
PVX_169270
PVX_000010	PcyM_1282500	Plasmodium exported protein, unknown function	7	0	no	0	no	18.61	yes	0	no	0	no
Blue	no ortholog	20
Overall expression					98/166		133/166		146/166		138/166		133/166

## Sheet: P. knowlesii - all stages 
Analysis by PlasmoDB, based on DNA Microarray Assay
			Data Set: Liver, mosquito and blood stage expression profiles [M=log2(cy5/cy3)]
Input Ortholog(s)	Gene ID	Product Description	Ortholog count	ring - 4hr	Stage Expression	late ring - 8hr	Stage Expression	mid trophozoite - 12hr	Stage Expression	mid trophozoite - 16hr	Stage Expression	schizont - 20hr	Stage Expression	Ex-vivo schizont - 24hr	Stage Expression
PVX_001780	PKNH_0602500	peptidase, putative	60	-1.03	yes	-1.24	yes	-0.96	yes	-1.02	yes	-0.13	yes	-0.15	yes
PVX_001810	PKNH_0603300	eukaryotic translation initiation factor subunit eIF2A, putative	53	-0.65	yes	-0.25	yes	-1.05	yes	-0.33	yes	-1.09	yes	-0.45	yes
PVX_001835	PKNH_0603600	60S ribosomal protein L30e, putative	60	1.32	yes	1.13	yes	0.69	yes	1.1	yes	0.4	yes	-0.9	yes
PVX_001895	PKNH_0604900	N-acetyltransferase, GNAT family, putative	58	0.82	yes	0.31	yes	-0.02	yes	-0.01	yes	-0.23	yes	-0.28	yes
PVX_001950	PKNH_0606000	VPS13 domain-containing protein, putative	20	-0.86	yes	-1.2	yes	-0.12	yes	0.07	yes	-1.31	yes	1.96	yes
PVX_002590	PKNH_0401700	40S ribosomal protein S30, putative	47	-0.69	yes	0.58	yes	-0.29	yes	0.45	yes	-0.77	yes	-1.69	yes
PVX_002945	PKNH_0409500	tyrosine kinase-like protein, putative	50	0	no	0	no	0	no	0	no	0	no	0	no
PVX_003565	PKNH_0418600	early transcribed membrane protein	286	0.88	yes	0.61	yes	0.43	yes	0.56	yes	-0.53	yes	1.58	yes
PVX_003570	PKNH_0418500	nucleic acid-binding protein, putative	11	-0.57	yes	0.26	yes	-0.03	yes	0.3	yes	-0.48	yes	-0.56	yes
PVX_003695
PVX_003810	PKNH_0413100	cysteine protease, putative	490	-0.52	yes	-0.7	yes	-0.8	yes	-0.83	yes	-0.59	yes	0.89	yes
PVX_003905	PKNH_0412100	6-cysteine protein P230	61	0.7	yes	0.44	yes	-0.11	yes	0.44	yes	-0.64	yes	0.92	yes
PVX_003955	PKNH_0411100	60S ribosomal protein L37ae, putative	61	1.12	yes	1.52	yes	0.89	yes	1.83	yes	1.23	yes	-0.49	yes
PVX_077695
PVX_080090	PKNH_1009700	heptatricopeptide repeat-containing protein, putative	60	0.24	yes	0.36	yes	0.26	yes	0.34	yes	0.38	yes	-0.04	yes
PVX_080270	PKNH_1013600	CCR4 domain-containing protein 1, putative	57	-0.84	yes	0.28	yes	0.58	yes	0.91	yes	-0.3	yes	1	yes
PVX_080275	PKNH_1013700	40S ribosomal protein S24, putative	61	0.47	yes	1.19	yes	0.73	yes	1.66	yes	0.32	yes	-1.3	yes
PVX_080405	PKNH_0930900	50S ribosomal protein L2, putative	122	-0.2	yes	-0.09	yes	0.33	yes	-0.14	yes	1.27	yes	-0.09	yes
PVX_080660	PKNH_1022100	RNA pseudouridylate synthase, putative	17	0.1	yes	0.15	yes	-0.22	yes	0.38	yes	-0.39	yes	0.77	yes
PVX_081615	PKNH_0210800	seipin domain-containing protein, putative	45	-1.79	yes	-1.94	yes	-0.69	yes	-0.84	yes	-0.42	yes	-1.23	yes
PVX_082480	PKNH_0105800	rhoptry-associated membrane antigen, putative	441	-1.72	yes	-2.43	yes	-3.11	yes	-2.65	yes	-0.26	yes	1.52	yes
PVX_082800	PKNH_1263900	zinc finger protein, putative	62	-0.16	yes	0.38	yes	0.64	yes	0.6	yes	0.84	yes	0.37	yes
PVX_082840	PKNH_1263100	60S ribosomal protein L6, putative	61	1.29	yes	1.45	yes	0.8	yes	1.27	yes	0.91	yes	-0.94	yes
PVX_082965	PKNH_1260200	60S ribosomal subunit protein L18, putative	60	0.89	yes	1.07	yes	0.53	yes	1.19	yes	0.78	yes	-2.06	yes
PVX_083000	PKNH_1259400	40S ribosomal protein S6, putative	60	-0.49	yes	0.47	yes	0.09	yes	0.76	yes	-1.3	yes	-1.83	yes
PVX_083465	PKNH_1249500	60S ribosomal protein L17, putative	60	0.52	yes	0.9	yes	0.38	yes	1.15	yes	0.09	yes	-1.34	yes
PVX_083555	PKNH_1247900	membrane associated histidine-rich protein 2	15	0	no	0	no	0	no	0	no	0	no	0	no
PVX_083560
PVX_084160	PKNH_1302200	dynein heavy chain, putative	57	0.96	yes	0.84	yes	0.24	yes	0.53	yes	0.56	yes	0.81	yes
PVX_084310	PKNH_1305300	tetratricopeptide repeat protein, putative	61	0	no	0	no	0	no	0	no	0	no	0	no
PVX_084325	PKNH_1120600	SICAvar, type I	29	0.97	yes	0.76	yes	0.2	yes	0.45	yes	0.81	yes	0.24	yes
PVX_084350	PKNH_1306300	conserved Plasmodium protein, unknown function	16	-0.92	yes	-1.59	yes	-1.89	yes	-1.65	yes	-0.25	yes	2.21	yes
PVX_084795	PKNH_0421400	mitochondrial acidic protein MAM33, putative	61	-1.29	yes	-0.15	yes	1.07	yes	1.26	yes	-1.15	yes	-1.81	yes
PVX_084855	PKNH_0420100	DNA topoisomerase 2, putative	122	-0.6	yes	-1.18	yes	-0.48	yes	-1.4	yes	-0.29	yes	1.5	yes
PVX_084865
PVX_084955	PKNH_1327000	60S ribosomal protein L14, putative	61	-0.74	yes	-0.28	yes	-0.9	yes	-0.28	yes	-0.66	yes	-2.71	yes
PVX_085030	PKNH_0110500	plasmepsin X, putative	123	-0.61	yes	-1.06	yes	-1.18	yes	-1.38	yes	-0.58	yes	0.48	yes
PVX_085270	PKNH_1333700	ribosomal protein L7A, putative	61	0.82	yes	1.15	yes	0.45	yes	1.15	yes	0.06	yes	-0.46	yes
PVX_085275	PKNH_1333800	60S ribosomal protein L5, putative	60	0.38	yes	1.02	yes	0.43	yes	1.11	yes	-1.32	yes	-2.03	yes
PVX_085310
PVX_085420	PKNH_1336700	40S ribosomal protein S25, putative	43	-1.11	yes	-0.54	yes	-1.35	yes	-0.52	yes	-1.6	yes	-2.72	yes
PVX_085735	PKNH_1343800	60S ribosomal protein L10, putative	61	0.34	yes	0.85	yes	0.26	yes	0.94	yes	0.41	yes	-0.68	yes
PVX_085790
PVX_085800	PKNH_1345300	conserved Plasmodium protein, unknown function	12	0.69	yes	0.93	yes	0.02	yes	0.38	yes	0.01	yes	0.26	yes
PVX_085885	PKNH_1347000	DnaJ protein, putative	56	-0.09	yes	0.43	yes	0.16	yes	0.23	yes	0.3	yes	-0.09	yes
PVX_085890	PKNH_1347100	rhomboid protease ROM8, putative	60	0.02	yes	0.44	yes	-0.26	yes	0.39	yes	-0.33	yes	1.67	yes
PVX_086020	PKNH_1349800	40S ribosomal protein S8e, putative	60	0.75	yes	0.42	yes	0.54	yes	0.22	yes	0.34	yes	-0.25	yes
PVX_086120	PKNH_1264600	parasitophorous vacuolar protein 3, putative	66	-0.71	yes	-0.76	yes	-1.54	yes	-0.89	yes	-1.2	yes	-1.77	yes
PVX_087745
PVX_087860	PKNH_0104900	60S ribosomal protein L37, putative	58	0	no	-0.03	yes	-0.36	yes	-0.1	yes	-0.64	yes	-1.66	yes
PVX_087885
PVX_087950	PKNH_0107000	heat shock protein 90, putative	124	-0.17	yes	-0.26	yes	-0.21	yes	-0.6	yes	-0.07	yes	-0.26	yes
PVX_088065	PKNH_0109300	60S ribosomal protein L34, putative	61	0.29	yes	0.92	yes	0.57	yes	0.86	yes	1.51	yes	-1.01	yes
PVX_089015	PKNH_1321100	ATP-dependent RNA helicase DBP10, putative	60	1.47	yes	1.14	yes	0.14	yes	0.67	yes	1.92	yes	-0.22	yes
PVX_089055	PKNH_1320300	HECT-like E3 ubiquitin ligase, putative	64	-0.17	yes	-0.3	yes	-0.79	yes	-0.32	yes	-1.03	yes	-0.72	yes
PVX_089280	PKNH_1315700	60S ribosomal protein L22, putative	60	0.21	yes	0.69	yes	0.07	yes	0.73	yes	-0.58	yes	-1.92	yes
PVX_089750	PKNH_0507500	60S ribosomal protein L15, putative	60	0.88	yes	0.88	yes	0.15	yes	0.84	yes	0.26	yes	-1.25	yes
PVX_090155	PKNH_0514200	alpha-tubulin II, putative	121	-0.09	yes	-0.19	yes	-0.24	yes	-0.42	yes	0.87	yes	-0.32	yes
PVX_090160	PKNH_0514300	40S ribosomal protein S19, putative	60	-0.45	yes	-0.33	yes	-1.19	yes	-0.58	yes	-0.88	yes	-2.07	yes
PVX_090230
PVX_090930	PKNH_0902600	histon H4, putative	57	0	no	0	no	0	no	0	no	0	no	0	no
PVX_091145	PKNH_0907200	60S ribosomal protein L36, putative	61	1.16	yes	1.14	yes	0.91	yes	1.06	yes	0.09	yes	-0.45	yes
PVX_091485	PKNH_0914800	ubiquitin carboxyl-terminal hydrolase UCH54, putative	61	-0.87	yes	-1.12	yes	0.26	yes	-0.89	yes	0.89	yes	-0.84	yes
PVX_091630
PVX_091635
PVX_091735	PKNH_0920000	conserved Plasmodium protein, unknown function	60	1.46	yes	0.53	yes	-0.03	yes	0.1	yes	2.04	yes	0.43	yes
PVX_091865	PKNH_0922800	60S ribosomal protein L35, putative	61	0.65	yes	0.44	yes	0.47	yes	0.13	yes	0.06	yes	-0.56	yes
PVX_091925	PKNH_0924100	40S ribosomal protein S18, putative	60	0.76	yes	0.81	yes	0.52	yes	1	yes	-0.28	yes	-1.02	yes
PVX_092120	PKNH_0928100	60S acidic ribosomal protein P0, putative	61	-0.29	yes	-0.48	yes	-0.89	yes	-0.68	yes	-0.65	yes	-1.07	yes
PVX_092335	PKNH_0932700	alpha/beta hydrolase, putative	59	-0.56	yes	-0.25	yes	0.1	yes	0	no	0.06	yes	-0.4	yes
PVX_092730	PKNH_0940300	60S ribosomal protein L28, putative	62	0.65	yes	1.39	yes	0.75	yes	1.8	yes	-0.5	yes	-1.31	yes
PVX_092735	PKNH_0940400	60S ribosomal protein L35ae, putative	59	0.76	yes	0	no	0.51	yes	0	no	0.7	yes	-0.67	yes
PVX_092820	PKNH_0942200	60S ribosomal protein L41, putative	46	0	no	0	no	0	no	0	no	0	no	0	no
PVX_092995	PKNH_0118300	tryptophan-rich antigen, tryptophan-rich protein	598	0	no	0.62	yes	-0.72	yes	-0.39	yes	-0.36	yes	1.48	yes
PVX_094275
PVX_094305	PKNH_0321800	hypothetical protein, conserved in P.knowlesi	44	0.49	yes	0.46	yes	-0.39	yes	0.15	yes	-0.21	yes	-0.17	yes
PVX_094400	PKNH_0802800	60S ribosomal protein L13, putative	61	1.22	yes	1.46	yes	1.17	yes	1.69	yes	0.55	yes	-0.84	yes
PVX_094600	PKNH_0807100	PHD finger protein PHD1, putative	38	0.97	yes	1.07	yes	0.75	yes	0.9	yes	-0.13	yes	-0.04	yes
PVX_094635	PKNH_0807700	tubulin beta chain, fragment	59	0.29	yes	-0.01	yes	-0.09	yes	-0.49	yes	2.13	yes	0	no
PVX_094675	PKNH_0808900	ribonuclease, putative	62	0.03	yes	0.24	yes	0.39	yes	0.18	yes	0.51	yes	0.37	yes
PVX_094810	PKNH_0811600	PRE-binding protein, putative	60	0.63	yes	0.77	yes	0.44	yes	0.53	yes	-0.07	yes	-0.08	yes
PVX_095095	PKNH_0817700	conserved Plasmodium protein, unknown function	71	-0.1	yes	0.36	yes	0.38	yes	0.24	yes	1.32	yes	0.25	yes
PVX_095190	PKNH_0819900	histone H2A.Z, putative	61	-1.54	yes	-0.99	yes	-0.81	yes	-0.78	yes	0.18	yes	1.4	yes
PVX_095350	PKNH_0824200	40S ribosomal protein S11, putative	122	0.29	yes	0.7	yes	0.11	yes	0.84	yes	0	no	-1.73	yes
PVX_096030
PVX_096035
PVX_096265	PKNH_0317000	40S ribosomal protein S5, putative	61	0.14	yes	0.47	yes	-0.06	yes	0.3	yes	-0.02	yes	-2.02	yes
PVX_097575	PKNH_1032600	tryptophan-rich protein	8	2.16	yes	1.37	yes	-0.89	yes	-0.06	yes	-0.66	yes	-0.55	yes
PVX_097760	PKNH_1029800	60S ribosomal protein L31, putative	61	0.55	yes	0.45	yes	-0.05	yes	0.44	yes	-0.52	yes	-1.58	yes
PVX_097915	PKNH_1026500	60S ribosomal protein L4, putative	61	0.63	yes	0.58	yes	0.51	yes	0.38	yes	-1.1	yes	-1.13	yes
PVX_097940	PKNH_1026000	protein CAF40, putative	60	0.62	yes	0.42	yes	-0.19	yes	-0.08	yes	-0.14	yes	-0.04	yes
PVX_098060	PKNH_1023600	conserved Plasmodium protein, unknown function	44	0.23	yes	0.24	yes	-0.02	yes	0.02	yes	0.08	yes	0.5	yes
PVX_098585
PVX_098640	PKNH_0701600	60S ribosomal protein L32, putative	61	1.7	yes	1.25	yes	0.6	yes	1.18	yes	-0.02	yes	-1.1	yes
PVX_098700	PKNH_0702800	nucleoporin NUP221, putative	68	-0.17	yes	-0.75	yes	-1.02	yes	-0.91	yes	-1.09	yes	-1.27	yes
PVX_098705	PKNH_0702900	mitochondrial carrier protein, putative	61	0.46	yes	0.24	yes	-0.12	yes	-0.08	yes	-0.15	yes	-0.2	yes
PVX_098710	PKNH_0214800	dynein heavy chain, putative	380	0	no	0	no	0	no	0	no	0	no	0	no
PVX_098950	PKNH_0114700	conserved Plasmodium protein, unknown function	126	-0.46	yes	0.11	yes	0.28	yes	0.03	yes	0.37	yes	0.28	yes
PVX_099510	PKNH_0719900	conserved Plasmodium protein, unknown function	58	1.23	yes	0.93	yes	0.37	yes	1.21	yes	0.08	yes	-0.11	yes
PVX_099525	PKNH_0720200	S-adenosylmethionine synthetase, putative	61	0.95	yes	0.36	yes	0.09	yes	0.24	yes	-0.47	yes	-0.13	yes
PVX_099530	PKNH_0720400	para-aminobenzoic acid synthetase, putative	56	0.22	yes	0.1	yes	0.17	yes	0.07	yes	0.32	yes	0.14	yes
PVX_099930	PKNH_0727900	high molecular weight rhoptry protein 2, putative	67	-3.3	yes	-3.56	yes	-3.63	yes	-3.56	yes	0.07	yes	0.64	yes
PVX_100005	PKNH_0729400	regulator of chromosome condensation, putative	46	-0.81	yes	-0.99	yes	0.01	yes	0.1	yes	0.33	yes	-0.49	yes
PVX_100625	PKNH_1452800	pentatricopeptide repeat domain-containing protein 2, putative	61	-0.56	yes	0.13	yes	0.99	yes	1.14	yes	-0.16	yes	-0.26	yes
PVX_101035	PKNH_1462000	40S ribosomal protein S17, putative	56	0.7	yes	0.84	yes	0.41	yes	0.68	yes	-0.23	yes	-1.36	yes
PVX_101200	PKNH_1345800	actin II, putative	122	0.15	yes	0.04	yes	0.58	yes	0.4	yes	-0.46	yes	-0.17	yes
PVX_101400	PKNH_1470100	osmiophilic body protein G377, putative	58	1.22	yes	1.21	yes	0.36	yes	0.9	yes	-0.25	yes	1.82	yes
PVX_101555	PKNH_0506800	conserved Plasmodium protein, unknown function	71	-0.5	yes	-0.72	yes	-0.74	yes	-0.94	yes	-0.39	yes	-0.41	yes
PVX_110835
PVX_110915	PKNH_0621400	conserved Plasmodium protein, unknown function	38	-1.07	yes	-1.03	yes	-0.99	yes	-0.97	yes	-2.29	yes	-1.61	yes
PVX_111290	PKNH_0613400	merozoite TRAP-like protein	42	0.4	yes	-0.51	yes	-0.28	yes	-0.65	yes	-0.51	yes	1.73	yes
PVX_111330	PKNH_0612200	60S ribosomal protein L3, putative	60	0.87	yes	0.75	yes	0.56	yes	0.65	yes	-0.08	yes	-0.28	yes
PVX_111355	PKNH_0611700	peroxiredoxin, putative	58	-0.29	yes	-1.16	yes	-1.05	yes	-1.04	yes	0.89	yes	2.01	yes
PVX_113265	PKNH_1148700	zinc finger protein, putative	63	0.62	yes	0.26	yes	0.6	yes	0.26	yes	0.05	yes	0.73	yes
PVX_113295	PKNH_1148100	SAC3 domain-containing protein, putative	60	-1.15	yes	-0.6	yes	-1.21	yes	-0.67	yes	-0.94	yes	-1.2	yes
PVX_113665	PKNH_1132500	histone H3 variant, putative	121	-1.62	yes	-1.93	yes	-1.23	yes	-1.6	yes	0.38	yes	0.45	yes
PVX_113780	PKNH_1137200	6-cysteine protein P12p, putative	59	0.23	yes	-0.11	yes	-0.56	yes	-0.47	yes	0.08	yes	0.54	yes
PVX_113850	PKNH_1135700	major facilitator superfamily-related transporter, putative	61	-1.66	yes	-1.05	yes	-1.3	yes	-0.91	yes	-1.11	yes	0.87	yes
PVX_113860	PKNH_1135500	60S ribosomal protein L19, putative	60	1.27	yes	1.27	yes	0.93	yes	1.21	yes	-0.55	yes	-1.07	yes
PVX_113995	PKNH_1132900	AP-2 complex subunit alpha, putative	62	-0.51	yes	-0.5	yes	-1.25	yes	-0.87	yes	-0.88	yes	-0.79	yes
PVX_114015	PKNH_1132600	histone H2A, putative	62	0	no	0	no	0	no	0	no	0	no	0	no
PVX_114040	PKNH_1132100	60S ribosomal protein L27a, putative	62	1.39	yes	1.13	yes	1.02	yes	1.16	yes	1.01	yes	-0.52	yes
PVX_114370	PKNH_0417200	5'-3' exonuclease, putative	117	-0.88	yes	-0.91	yes	-0.66	yes	-0.89	yes	-0.71	yes	-0.07	yes
PVX_114480	PKNH_1122300	protein DJ-1, putative	61	-0.18	yes	-0.07	yes	1.07	yes	0.99	yes	0.28	yes	-0.04	yes
PVX_114515	PKNH_1121500	choline/ethanolaminephosphotransferase, putative	60	0.67	yes	-0.12	yes	-0.67	yes	-0.59	yes	-0.33	yes	0.76	yes
PVX_114830	PKNH_1114400	elongation factor 1-alpha, putative	115	0.65	yes	0.72	yes	0.71	yes	1.12	yes	0.59	yes	-0.88	yes
PVX_114910	PKNH_1112500	40S ribosomal protein S15, putative	61	1.31	yes	1.32	yes	1.1	yes	1.16	yes	0.45	yes	-0.38	yes
PVX_114990	PKNH_1110800	guanylyl cyclase, putative	56	0.25	yes	0.14	yes	-0.16	yes	-0.16	yes	-0.27	yes	-0.12	yes
PVX_115255	PKNH_1105400	ubiquitin-60S ribosomal protein L40, putative	62	-0.08	yes	0.38	yes	-0.16	yes	0.4	yes	-0.22	yes	-1.09	yes
PVX_115275	PKNH_1105000	conserved Plasmodium protein, unknown function	51	0.42	yes	0.34	yes	0.04	yes	0.3	yes	-1.04	yes	-0.7	yes
PVX_115460	PKNH_1100700	Plasmodium exported protein, unknown function	13	0	no	0	no	0	no	0	no	0	no	0	no
PVX_116655	PKNH_1204500	conserved Plasmodium protein, unknown function	64	0.02	yes	-0.26	yes	0.02	yes	0.05	yes	0.15	yes	0.15	yes
PVX_116700	PKNH_1205400	60S ribosomal protein L23, putative	60	1.03	yes	1.53	yes	1.04	yes	1.52	yes	-0.06	yes	-0.99	yes
PVX_116715	PKNH_1205700	60S ribosomal protein L6, putative	60	0.97	yes	0.94	yes	0.75	yes	0.8	yes	1.47	yes	-1.22	yes
PVX_116915	PKNH_1209900	exported protein 2, putative	61	-1.16	yes	0.22	yes	0.33	yes	0.74	yes	-1.9	yes	-0.05	yes
PVX_117060	PKNH_1213100	MORC family protein, putative	61	0.45	yes	0.01	yes	-0.42	yes	0.04	yes	-1.04	yes	-0.04	yes
PVX_117135	PKNH_1214900	enkurin domain-containing protein, putative	63	1.36	yes	1.49	yes	0.65	yes	0.98	yes	0.38	yes	0.85	yes
PVX_117390	PKNH_1220400	40S ribosomal protein S28e, putative	61	0.82	yes	0.77	yes	0.83	yes	0.54	yes	0.98	yes	0.71	yes
PVX_117420	PKNH_1221000	60S ribosomal protein L27, putative	60	0.57	yes	0.63	yes	0.34	yes	0.36	yes	-0.43	yes	-0.92	yes
PVX_117440	PKNH_1221400	60S ribosomal protein L29, putative	58	0.13	yes	1.48	yes	1.23	yes	2.07	yes	0.71	yes	-0.74	yes
PVX_117570	PKNH_1223900	conserved Plasmodium protein, unknown function	34	0.13	yes	0.02	yes	0.84	yes	0.15	yes	0.75	yes	0.45	yes
PVX_117685	PKNH_1226200	ferlin, putative	59	-0.25	yes	-0.23	yes	-0.28	yes	-0.46	yes	0.31	yes	-0.16	yes
PVX_118145	PKNH_1235200	40S ribosomal protein S5, putative	60	-0.86	yes	-0.4	yes	-1.4	yes	-0.43	yes	-1.26	yes	-2.44	yes
PVX_118230	PKNH_1237100	ATP-dependent RNA helicase MAK5, putative	63	1.27	yes	0.95	yes	0.58	yes	0.64	yes	-0.08	yes	0.26	yes
PVX_118340	PKNH_1239300	serine/threonine protein kinase, putative	53	0.3	yes	0.1	yes	0.47	yes	0.06	yes	-0.07	yes	1.12	yes
PVX_118345	PKNH_1239400	Sec7 domain-containing protein ARFGEF, putative	38	-1.1	yes	-0.61	yes	-0.32	yes	-0.2	yes	0.16	yes	-0.97	yes
PVX_118625	PKNH_1245200	trailer hitch homolog, putative	60	-1.06	yes	-0.18	yes	-0.41	yes	0.04	yes	-0.34	yes	-0.75	yes
PVX_118695
PVX_119225
PVX_119250	PKNH_0840600	serine/threonine protein kinase, putative	63	0.68	yes	0.52	yes	0	no	0.27	yes	0.79	yes	-0.07	yes
PVX_119345	PKNH_0838700	60S ribosomal protein L44, putative	62	1.28	yes	1.23	yes	0.84	yes	1.49	yes	0.02	yes	-0.79	yes
PVX_119470	PKNH_0835700	40S ribosomal protein S23, putative	61	0.95	yes	0.85	yes	0.71	yes	0.74	yes	1.31	yes	-0.59	yes
PVX_119765	PKNH_0828800	conserved Plasmodium protein, unknown function	55	-0.06	yes	-0.1	yes	-0.4	yes	-0.33	yes	0.11	yes	-0.14	yes
PVX_121965	PKNH_0810000	DNA2/NAM7 helicase, putative	125	0.22	yes	0.92	yes	0.47	yes	0.83	yes	-1.32	yes	-1.17	yes
PVX_122030	PKNH_1404000	peptidase, putative	43	-0.24	yes	-0.27	yes	0.87	yes	0.51	yes	0.49	yes	0.21	yes
PVX_122285	PKNH_1409500	60S ribosomal protein L24, putative	60	0.26	yes	0.56	yes	0.11	yes	0.79	yes	-0.54	yes	-1.42	yes
PVX_122465	PKNH_1413400	protein AAP2, putative	26	0.18	yes	-1.08	yes	-0.15	yes	-0.78	yes	-0.53	yes	2.1	yes
PVX_123060	PKNH_1426100	DNA/RNA-binding protein Alba 1, putative	60	0.33	yes	1.19	yes	1.36	yes	1.78	yes	-1.12	yes	-1.31	yes
PVX_123070	PKNH_1426300	60S ribosomal protein L13-2, putative	63	1.24	yes	1.12	yes	0.99	yes	0.76	yes	0.51	yes	0.1	yes
PVX_123075	PKNH_1426400	40S ribosomal protein S16, putative	61	-1.59	yes	-0.09	yes	-0.84	yes	-0.25	yes	-2.27	yes	-3.22	yes
PVX_123800	PKNH_1442600	phospholipid-transporting ATPase, putative	65	0.29	yes	0.73	yes	0.71	yes	0.58	yes	0.02	yes	1.03	yes
PVX_123805	PKNH_1442700	conserved Plasmodium protein, unknown function	32	0.19	yes	0.18	yes	0.71	yes	0.31	yes	-0.04	yes	0.47	yes
PVX_123845	PKNH_1443600	polyadenylate-binding protein 1, putative	62	0.84	yes	0.46	yes	0.11	yes	0.86	yes	-0.61	yes	-1.47	yes
PVX_124080	PKNH_1448400	conserved Plasmodium protein, unknown function	64	0.9	yes	0.46	yes	0.23	yes	0.38	yes	0.29	yes	0.32	yes
PVX_169270
PVX_000010
Blue	no ortholog	20
Overall expression					136/166		137/166		137/166		136/166		135/166		135/166
