# Supplementary material for: Identification of cross-stage, cross-species malaria CD8+ T cell antigens
Source: Research Square preprint supplement (doi:10.21203/rs.3.rs-6682089/v1), 2025-05-30
Supplement: Supplementary file 1 [file 41df0e28409d0f140ab28d56.pdf]

## EXTENDED DATA TABLES

Extended data table 1 | *Plasmodium falciparum* homology

| Protein name       | Number of patients | <i>P. falciparum</i> homology (%) |
|--------------------|--------------------|-----------------------------------|
| 60S L4/L1          | 7                  | 83                                |
| ETRAMP A5KBH5      | 7                  | 63                                |
| 40S S2             | 6                  | 97                                |
| Don Juan           | 6                  | 53                                |
| ETRAMP A5K676      | 6                  | 43                                |
| 40S S11            | 5                  | 99                                |
| Histone H2A A5K214 | 5                  | 98                                |
| EF 1-alpha         | 5                  | 98                                |
| 40S S23            | 5                  | 98                                |
| 60S L32            | 5                  | 94                                |
| 60S L29            | 5                  | 91                                |
| 40S S8             | 5                  | 89                                |
| 40S S6             | 5                  | 89                                |
| 40S S30            | 5                  | 89                                |
| 40S S25            | 5                  | 86                                |
| 60S L13            | 5                  | 80                                |
| Histone H2A A5K7L8 | 4                  | 97                                |
| 60S L37            | 4                  | 97                                |
| 60S L30            | 4                  | 92                                |
| Alba domain        | 4                  | 91                                |
| Ubiq/Rib           | 4                  | 91                                |
| 60S L36            | 4                  | 90                                |
| 60S L35            | 4                  | 81                                |
| 60S L23a           | 4                  | 64                                |
| Unch. A5K8G9       | 4                  | 33                                |
| Histone H3         | 3                  | 100                               |
| 60S L37a           | 3                  | 100                               |
| 50S S28e           | 3                  | 97                                |
| 60S L44            | 3                  | 97                                |
| 60S L10            | 3                  | 96                                |
| 60S L8             | 3                  | 95                                |
| 60S L9             | 3                  | 94                                |
| 60S L33-B          | 3                  | 92                                |
| 60S L18a           | 3                  | 92                                |
| 60S L13a           | 3                  | 91                                |
| 60S L34-A          | 3                  | 91                                |
| 60S L31            | 3                  | 90                                |
| 60S L17            | 3                  | 89                                |
| 60S L7a            | 3                  | 84                                |
| PPR_long domain    | 3                  | 59                                |
| Unch. A5K9Y3       | 3                  | 43                                |
| PI3K/PI4K          | 3                  | 36                                |
| Unch. A5K4L2       | 3                  | 32                                |
| Unch. A5K8G8       | 3                  | 0                                 |
| Unch. A5KC18       | 3                  | 23                                |

**Extended data table 2 | Primers used for *Plasmodium falciparum* liver stage expression**

| Primer             | Sequence                        |
|--------------------|---------------------------------|
| NF135 40S S25-1F   | 5'-TCTCCCAGAGCTGTTTACCC-3'      |
| NF135 40S S25-1R   | 5'-TCATCTTCCAAGTTGTCACACA-3'    |
| NF135 40S S30-1F   | 5'-ATGGGAAAGGTACATGGATCATTAG-3' |
| NF135 40S S30-1R   | 5'-ACTTTGGGACTTTAGGAGTCTGG-3'   |
| NF135 60S L13-1F   | 5'-AAGAGTTAAAGGGAGCCGGA-3'      |
| NF135 60S L13-1R   | 5'-ACCTCCAATACCTTTCTTTGCT-3'    |
| NF135 60S L29-1F   | 5'-ACCGTAAAGCCCATAAGAATGGA-3'   |
| NF135 60S L29-1R   | 5'-GGATCCAACCCTTTACGCGA-3'      |
| NF135 H2A-1F       | 5'-TAGGTTCCACAGCAGCAGTT-3'      |
| NF135 H2A-1R       | 5'-AACACCACCACCAGCAATTG-3'      |
| NF135 CSP-1F       | 5'-GCCAAATGACCCAAACCGAA-3'      |
| NF135 CSP-1R       | 5'-GGTTTATTAGCAGAGCCAGGC-3'     |
| NF135 TRAP-1F      | 5'-AGAGAAACACGTCCACATGG-3'      |
| NF135 TRAP-1R      | 5'-TCCAGCTATTCCACCTGCAA-3'      |
| 18S rRNA (3D7) -1R | 5'-GGGTTCTGGGGCGAGTATT-3'       |
| 18S rRNA (3D7) -1R | 5'-GCCATGCATCACCATCCAAG-3'      |

EXTENDED DATA FIGURE

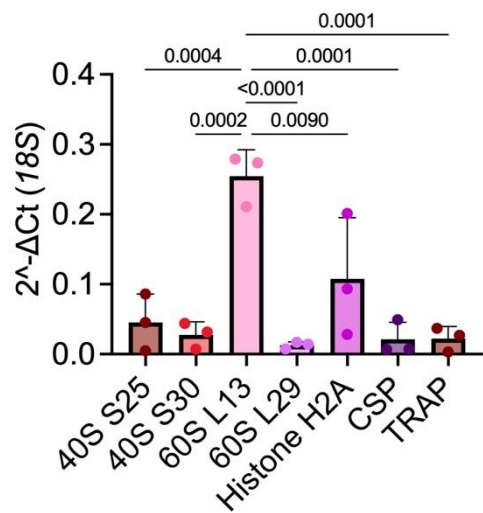

**Extended data figure 1 | Antigen gene expression in humanized mouse livers infected with *Plasmodium falciparum* (Pf).** The expression of genes related to antigens found in *P. vivax* immunopeptidomics was analysed in the liver stage of *Pf* infection. Pf 18S rRNA was used as endogenous gene. CSP and TRAP genes were used as positive control. Statistical analyse was performed by one-way ANOVA, with Turkey’s multiple comparison test. Actual P values are shown.

## Extended data figure 2 | Spectral match validation

| Peptide         |               |    | Biological peptide |   |       |             | Synthetic peptide |    |       |             | Validation |
|-----------------|---------------|----|--------------------|---|-------|-------------|-------------------|----|-------|-------------|------------|
| Sequence        | ID            | n  | [m/z]              | z | RT    | Peaks Score | [m/z]             | z  | RT    | Peaks Score | (y/n)      |
| AIEPSLAQLAQK    | Ubqt/ribos- 1 | 12 | 635.3643           | 2 | 41.42 | 37.49       | 634.8646          | 2  | 41.64 | 48.35       | Y          |
| AKAVKKQKKTLKPV  | 60S L31       | 14 | 523.0190           | 3 | 21.67 | 45.30       | NA                | NA | NA    | NA          | NA         |
| ANKALLPTAGDD    | 60S L4/L1- 1  | 12 | 593.3108           | 2 | 34.53 | 50.03       | 593.3093          | 2  | 34.31 | 52.84       | Y          |
| APISAGIKKPHR    | Hist. H3      | 12 | 425.5951           | 3 | 25.01 | 40.59       | 425.5946          | 3  | 23.20 | 23.34       | Y          |
| AQIKKKKKLTPA    | Don Juan      | 13 | 494.6678           | 3 | 24.09 | 36.08       | 494.6680          | 3  | 20.52 | 41.55       | Y          |
| ASGGVLPNIHNV    | Hist. H2A- 2  | 12 | 589.3206           | 2 | 39.78 | 25.89       | 589.3203          | 2  | 39.89 | 37.05       | Y          |
| AVKKVGKIVK      | 60S L32-2     | 10 | 357.2537           | 3 | 22.97 | 22.03       | 357.2534          | 3  | 20.62 | 27.81       | Y          |
| DNNEHVVEKETV    | Unch A5JZN7.2 | 12 | 706.3463           | 2 | 27.81 | 53.74       | 706.3451          | 2  | 26.94 | 49.45       | Y          |
| DNNEHVVEKETVSF  | Unch A5JZN7.1 | 14 | 549.2657           | 3 | 35.20 | 61.62       | 549.2657          | 3  | 34.69 | 47.01       | Y          |
| EDYSPRKV        | Unch A5K8G9   | 8  | 497.2546           | 2 | 26.23 | 39.03       | 497.2538          | 2  | 24.87 | 29.67       | Y          |
| GAFGKPNGV       | 60S L10       | 9  | 423.7279           | 2 | 30.37 | 19.14       | 423.7272          | 2  | 29.41 | 29.60       | Y          |
| GKGKNKEKL       | 40S S25- 1    | 9  | 501.3087           | 2 | 20.20 | 33.76       | 501.3089          | 2  | 19.19 | 25.14       | Y          |
| GKGKNKEKLNHAVF  | 40S S25- 2    | 14 | 523.9681           | 3 | 25.17 | 48.81       | 523.9667          | 3  | 24.09 | 25.39       | Y          |
| GLNQKQPTKGSNIQ  | ETRAMP- 2     | 14 | 757.4133           | 2 | 24.53 | 37.29       | 756.9106          | 2  | 23.51 | 45.90       | Y          |
| GPKRATKIRK      | 40S S6- 3     | 10 | 385.5873           | 3 | 20.09 | 38.30       | 385.5876          | 3  | 18.95 | 33.14       | Y          |
| GRIGRYLKKGYA    | Hist. H2A- 4  | 13 | 378.2308           | 4 | 32.42 | 33.32       | 378.2307          | 4  | 26.84 | 33.94       | Y          |
| GRIGRYLKKGYAK   | Hist. H2A- 1  | 14 | 410.2536           | 4 | 30.86 | 33.56       | 410.2541          | 4  | 25.27 | 17.95       | Y          |
| GSKQVHVV        | 40S S8- 2     | 8  | 427.2482           | 2 | 24.78 | 41.76       | 427.2479          | 2  | 23.31 | 37.69       | Y          |
| GTGRKKGPNSKL    | 40S S30- 2    | 12 | 414.9137           | 3 | 20.78 | 46.04       | 414.9140          | 3  | 19.77 | 36.32       | Y          |
| GTPIEKLHPI      | 60S L13- 2    | 10 | 552.8251           | 2 | 34.59 | 27.43       | 552.8255          | 2  | 34.19 | 35.45       | Y          |
| GVKKDVAK        | 40S S6- 2     | 8  | 422.7661           | 2 | 19.95 | 34.31       | 422.7660          | 2  | 18.91 | 26.58       | Y          |
| KKVAAGYKKLTD    | ETRAMP- 1     | 12 | 441.2663           | 3 | 24.33 | 41.58       | 441.2662          | 3  | 22.62 | 39.46       | Y          |
| KKYKNKKFKPY     | 60S L35       | 11 | 491.2969           | 3 | 27.30 | 25.41       | 491.6320          | 3  | 23.68 | 19.14       | Y          |
| KNIKSKNGIGGIPAD | 60S L13- 3    | 15 | 504.6231           | 3 | 27.71 | 31.77       | 504.6229          | 3  | 26.84 | 16.62       | Y          |
| KSAGADSKSLKKLD  | ETRAMP- 5     | 14 | 483.6093           | 3 | 23.95 | 34.26       | 483.2758          | 3  | 22.52 | 44.23       | Y          |
| KVPVPPTQAKPKKN  | Hist. H2A- 5  | 15 | 415.7615           | 4 | 23.19 | 35.10       | 415.7620          | 4  | 21.87 | 40.76       | Y          |
| LETYQNMKIQQTP   | 40S S2        | 14 | 861.4510           | 2 | 32.68 | 40.56       | 861.9502          | 2  | 31.64 | 48.98       | Y          |
| LGGLNQKQPT      | ETRAMP- 4     | 10 | 528.2960           | 2 | 28.65 | 37.38       | 528.2964          | 2  | 27.59 | 39.32       | Y          |
| LILRAAIKTK      | Unch A5K8J8   | 10 | 1126.7635          | 1 | 54.45 | 17.89       | 376.2605          | 3  | 29.11 | 20.42       | N          |
| LNQKQPTKGSNIQ   | ETRAMP- 3     | 13 | 728.4005           | 2 | 23.52 | 25.98       | 728.4000          | 2  | 22.49 | 41.12       | Y          |
| MYKKVYVID       | 60S L3a       | 9  | 579.8156           | 2 | 32.90 | 39.80       | 579.8154          | 2  | 31.92 | 31.61       | Y          |
| NKALLPTAGDD     | 60S L4/L1- 2  | 11 | 557.7906           | 2 | 34.65 | 43.43       | 557.7903          | 2  | 35.38 | 50.46       | Y          |
| NQLRPKKLKL      | Ubqt/ribos- 2 | 10 | 418.2789           | 3 | 21.63 | 26.12       | 418.2785          | 3  | 19.94 | 19.81       | Y          |
| PKFFKNQRY       | 60S L29       | 9  | 409.8929           | 3 | 28.72 | 38.08       | 409.8927          | 3  | 27.66 | 31.37       | Y          |
| RLTGGKKKIHKKK   | 40S S8- 1     | 13 | 381.5072           | 4 | 20.20 | 43.53       | NA                | NA | NA    | NA          | NA         |
| SDGTGRKKGPNSKL  | 40S S30- 1    | 14 | 482.2673           | 3 | 21.44 | 48.01       | 482.2670          | 3  | 20.18 | 37.03       | Y          |
| SFFNSKKIKKGSKS  | 40S S11       | 14 | 529.3069           | 3 | 25.90 | 41.15       | 397.2319          | 4  | 23.01 | 37.69       | Y          |
| SGGVLPNIHNV     | Hist. H2A- 3  | 11 | 553.8022           | 2 | 39.63 | 29.28       | 533.8016          | 2  | 39.69 | 34.16       | Y          |
| SKNGKNRFKPKIQ   | 40S S6- 1     | 14 | 415.2520           | 4 | 26.02 | 36.88       | 415.2518          | 4  | 24.19 | 30.73       | Y          |
| SSHAKGIVVEKV    | 40S S23       | 12 | 418.5784           | 3 | 27.41 | 44.55       | 418.5784          | 3  | 25.94 | 43.89       | Y          |
| TGRKKGPNSKL     | 40S S30- 3    | 11 | 395.9069           | 3 | 20.74 | 37.56       | 297.1819          | 4  | 19.67 | 25.63       | N          |
| TPIITNKPFPG     | ETRAMP- 6     | 10 | 544.3114           | 2 | 38.69 | 36.66       | 544.3113          | 2  | 38.87 | 46.35       | Y          |
| VITDVGDSDIIKTNE | 60S L30       | 15 | 809.9135           | 2 | 41.55 | 55.90       | 809.9135          | 2  | 41.11 | 55.13       | Y          |
| VSEVTTVEKDE     | 60S L9        | 11 | 618.3045           | 2 | 30.31 | 35.50       | 618.3038          | 2  | 29.67 | 41.63       | Y          |
| YESIEVSKID      | 60S L13- 1    | 10 | 591.7995           | 2 | 38.03 | 40.35       | 591.7988          | 2  | 37.62 | 41.05       | Y          |
| YGRIFKKKITKK    | 60S L4/L1- 3  | 12 | 378.4963           | 4 | 28.58 | 35.21       | 378.2462          | 4  | 23.62 | 15.05       | N          |

n amino acid length

[m/z] Mass over Charge

z charge state

RT Retention Time

NA Not Available

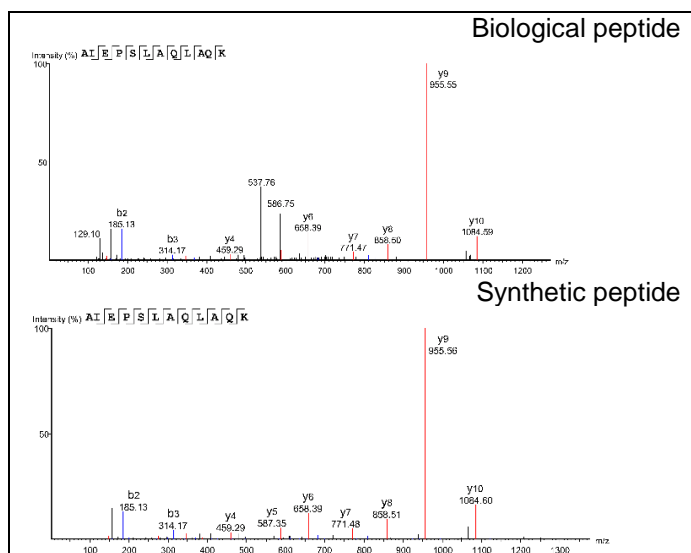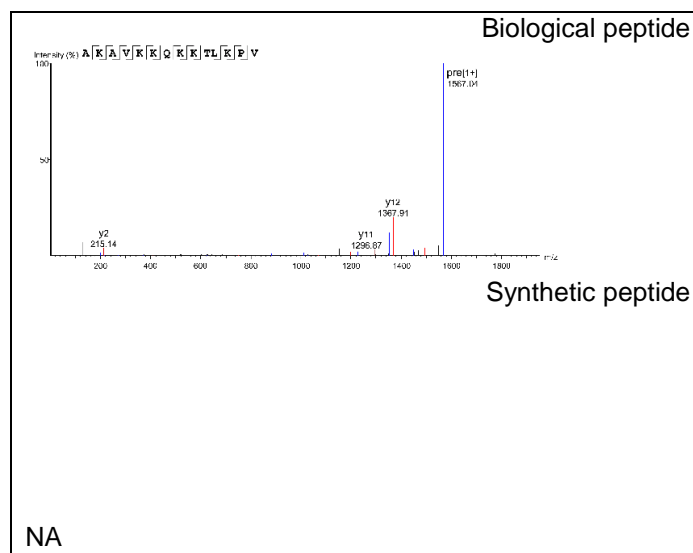

NA

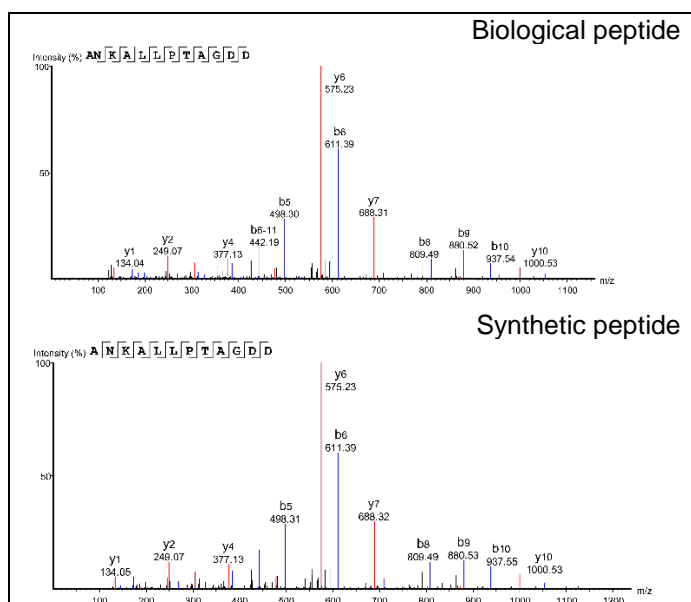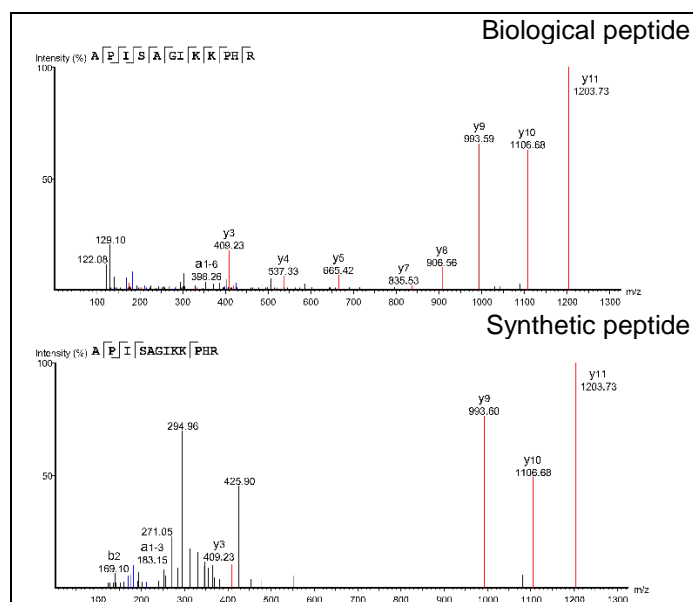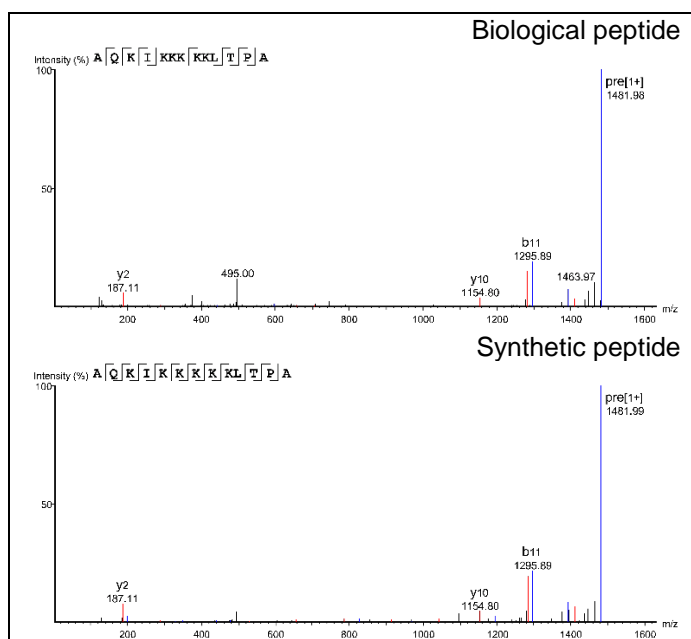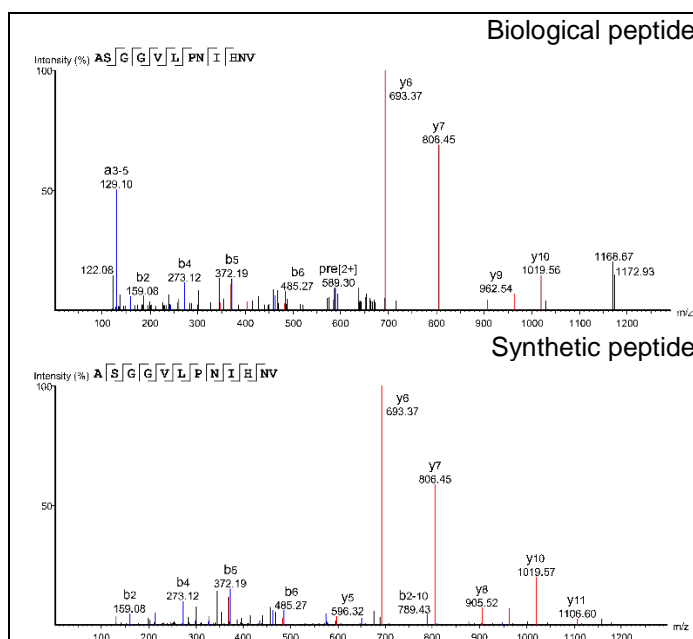

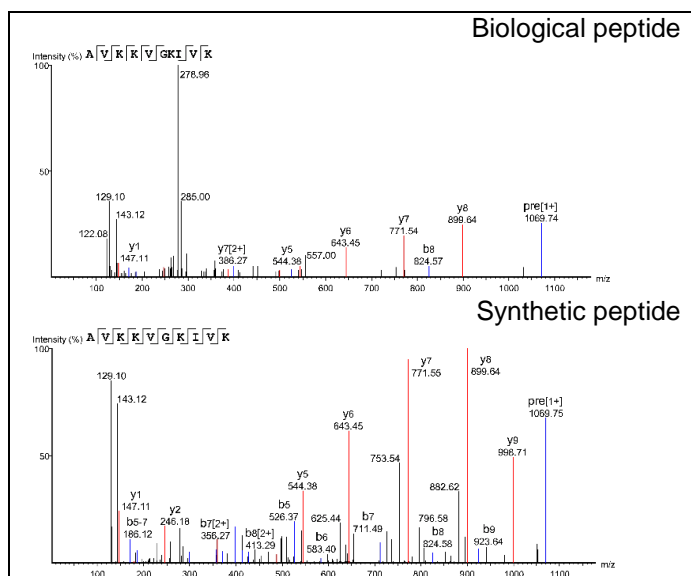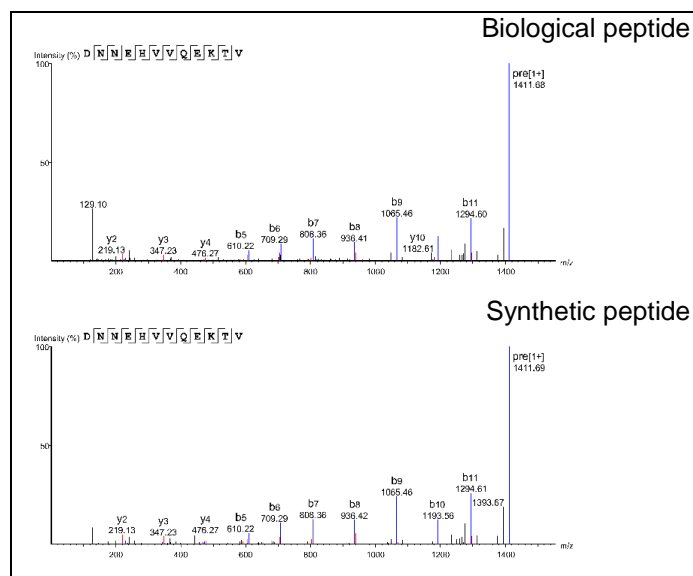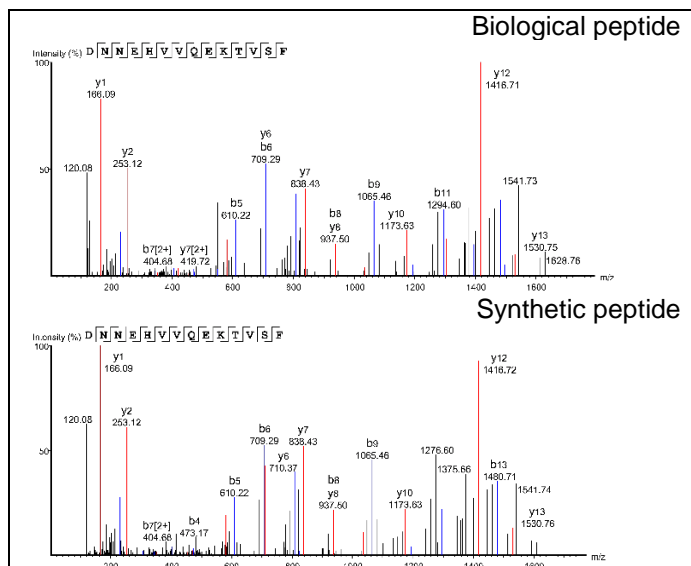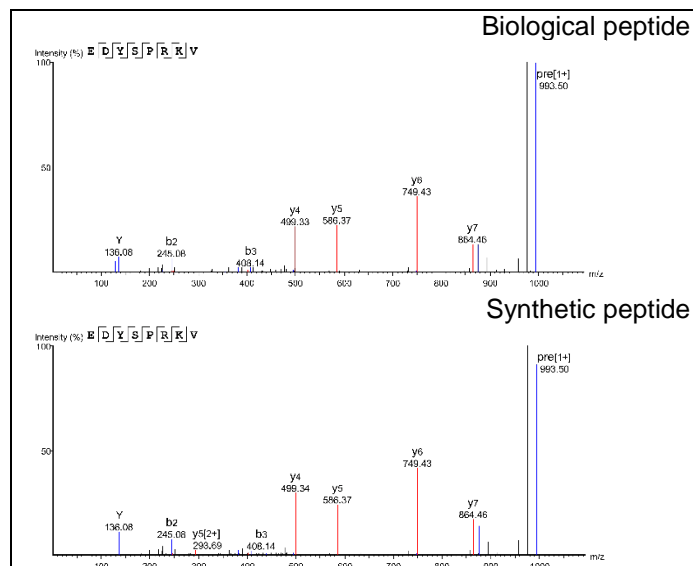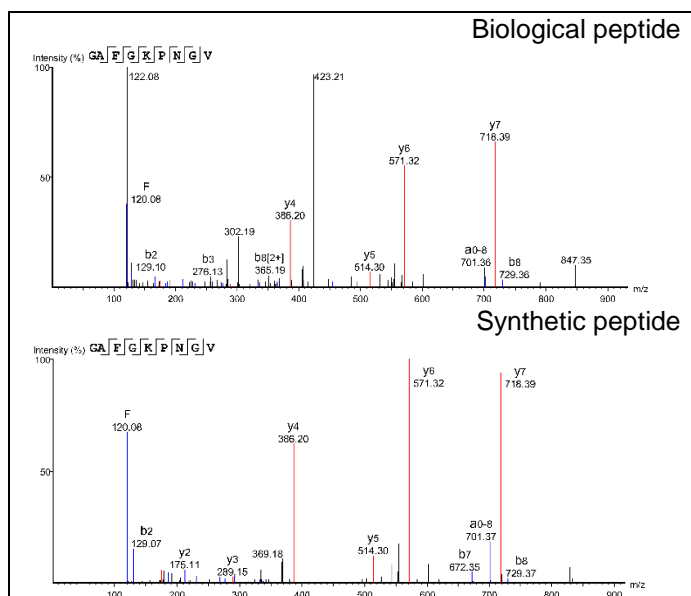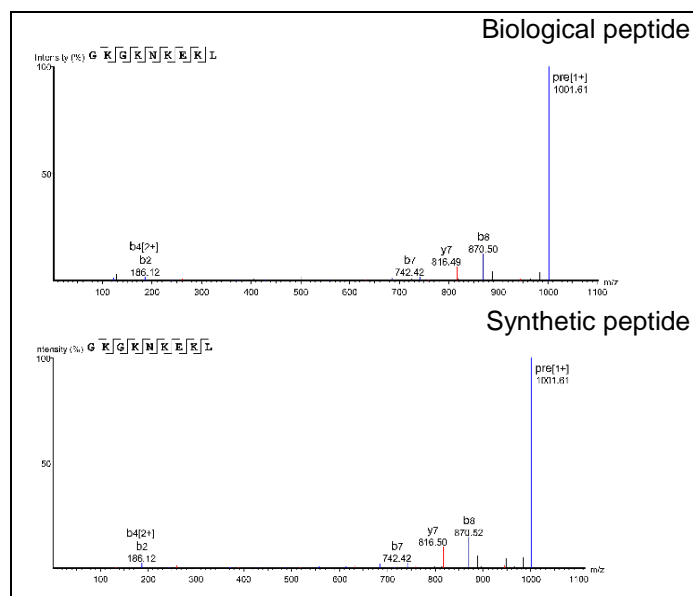

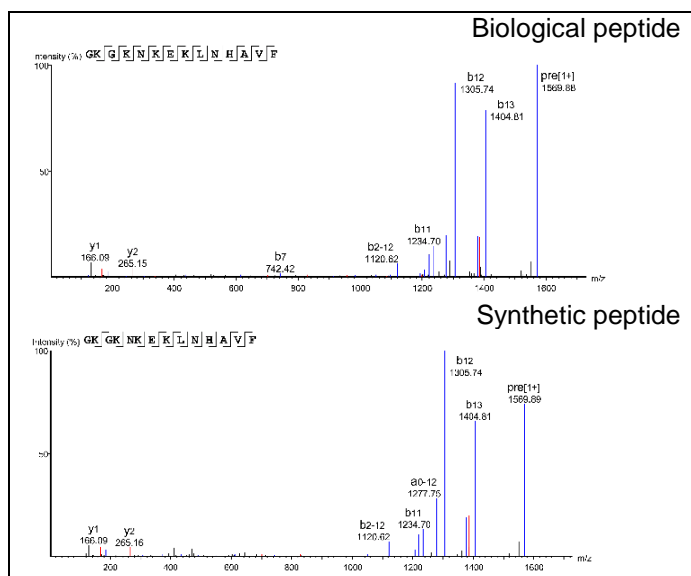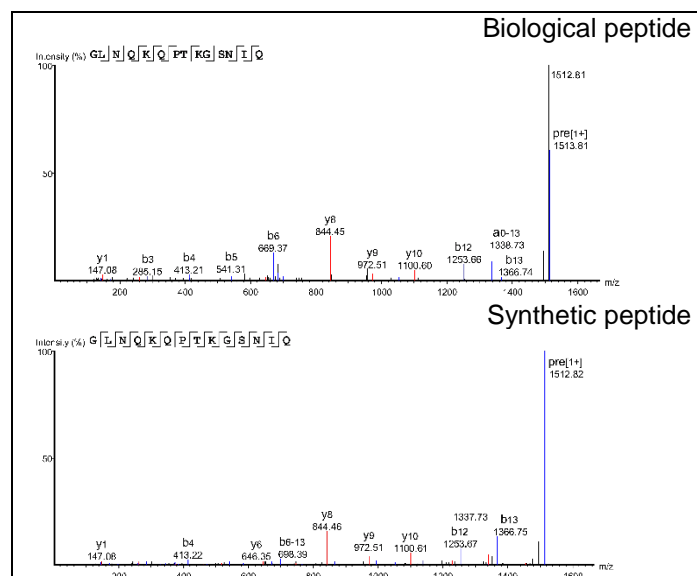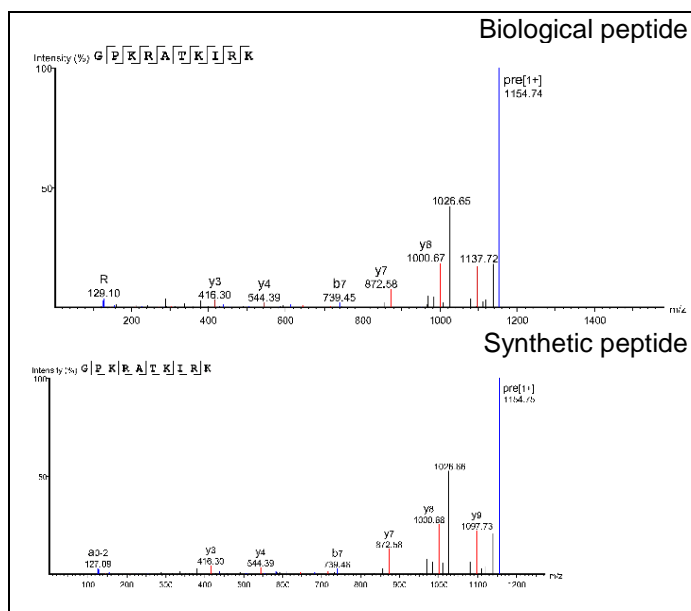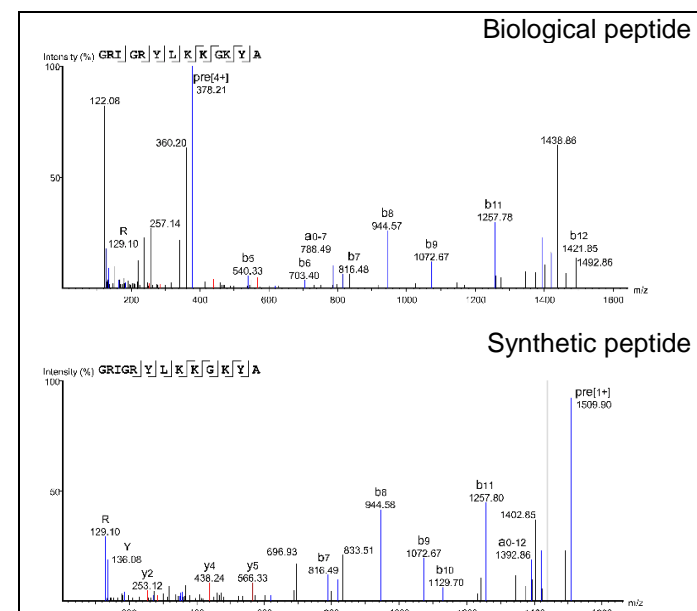

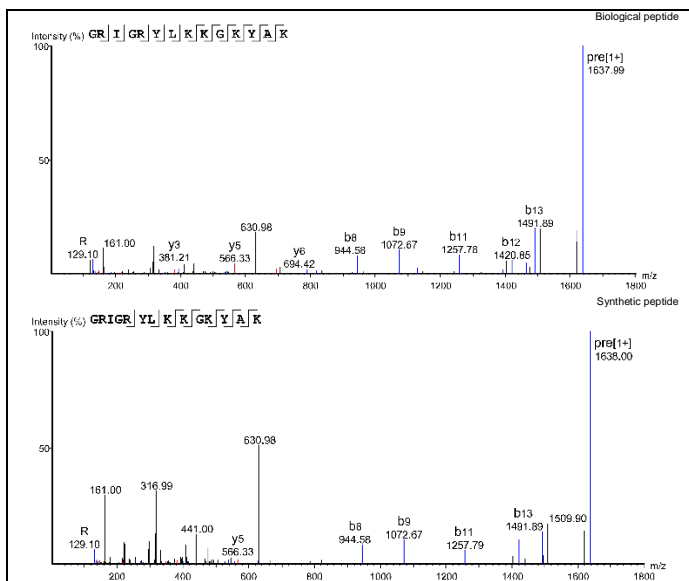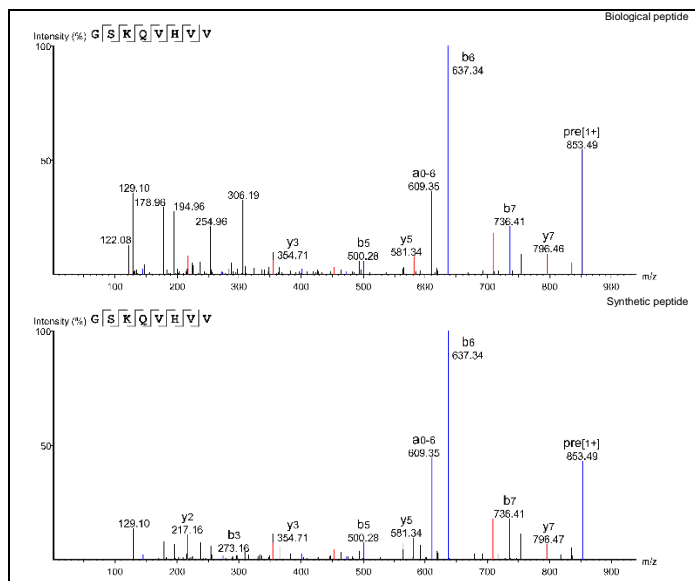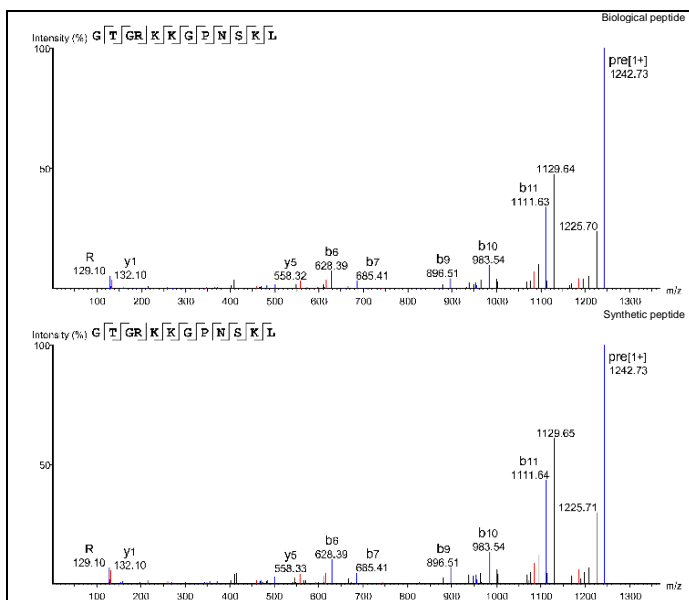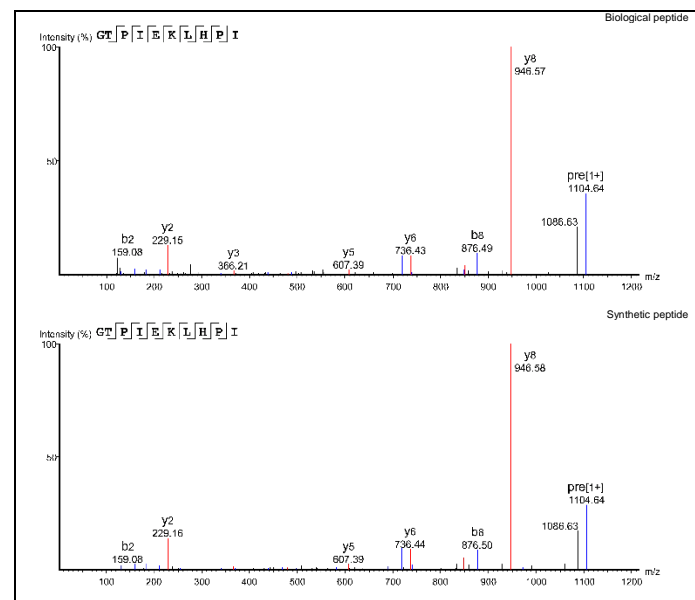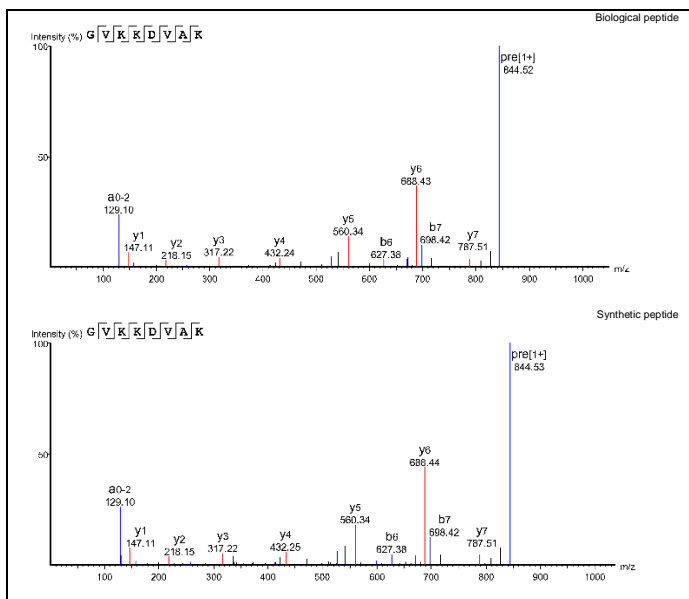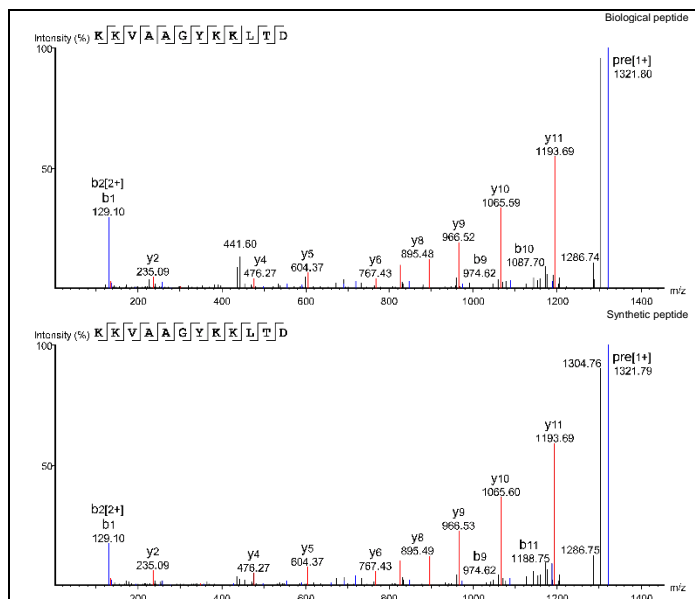



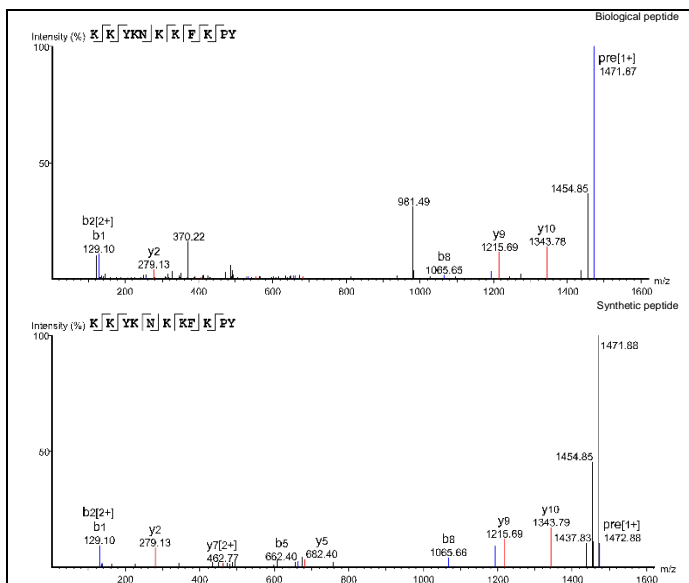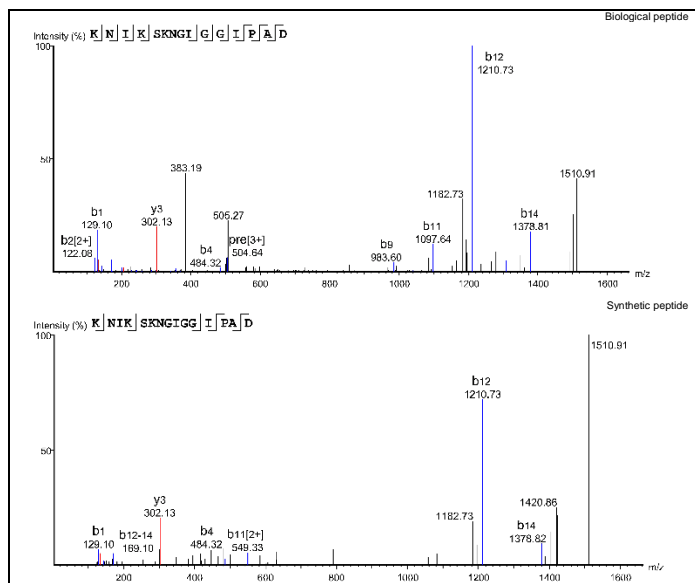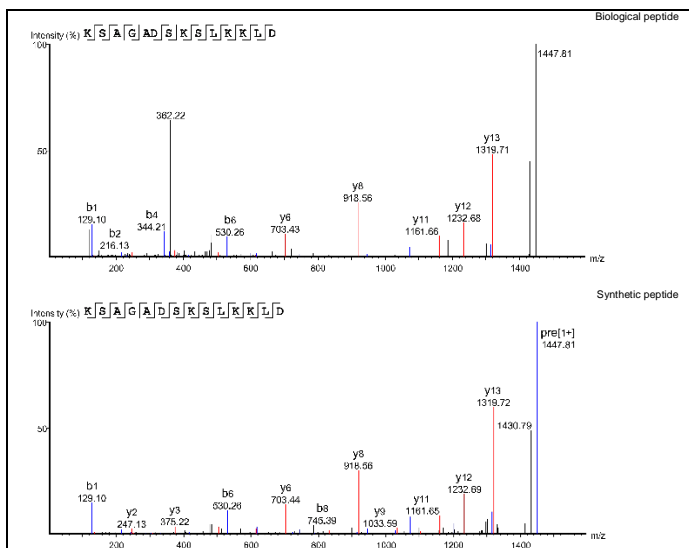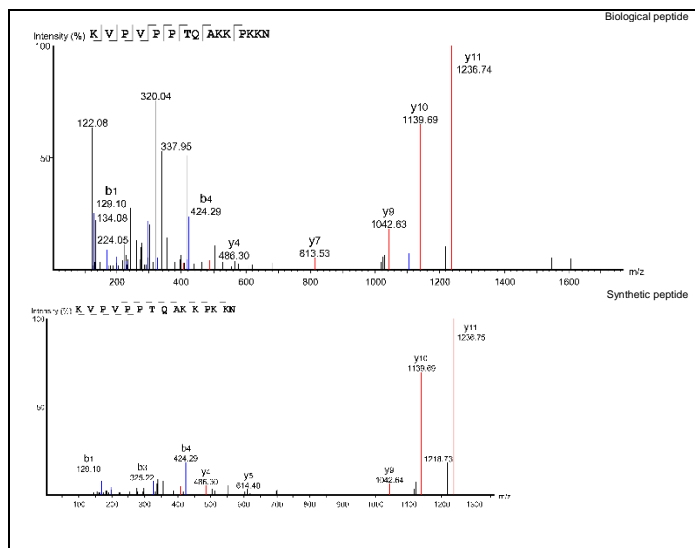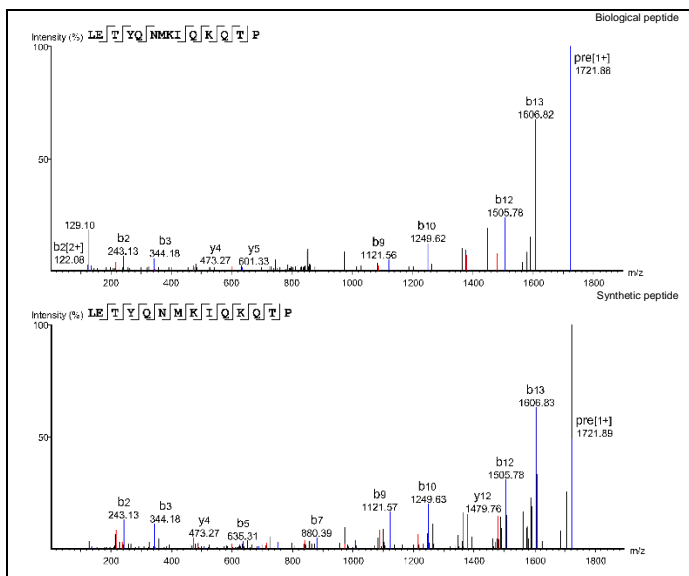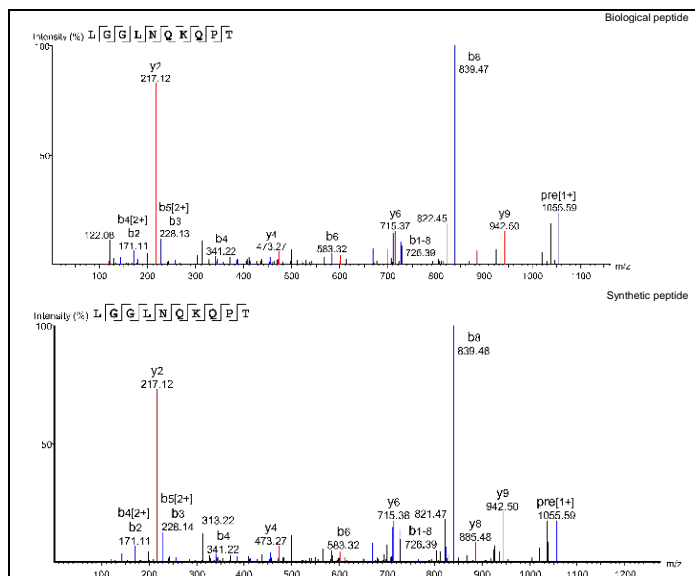

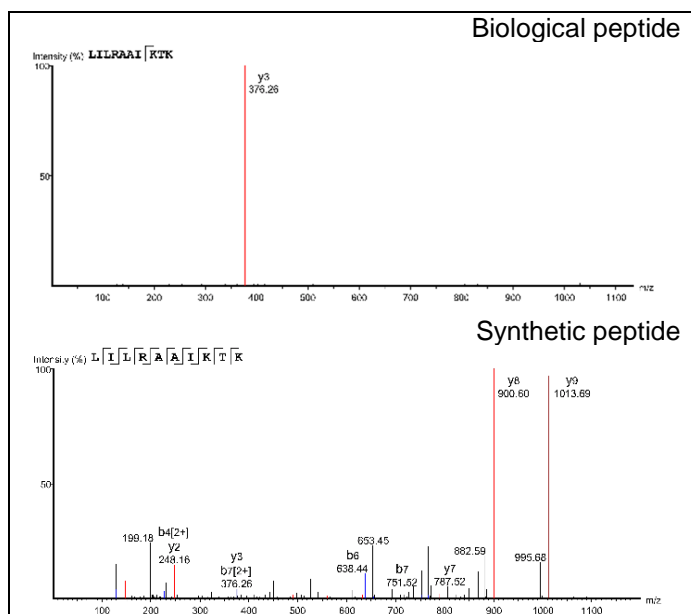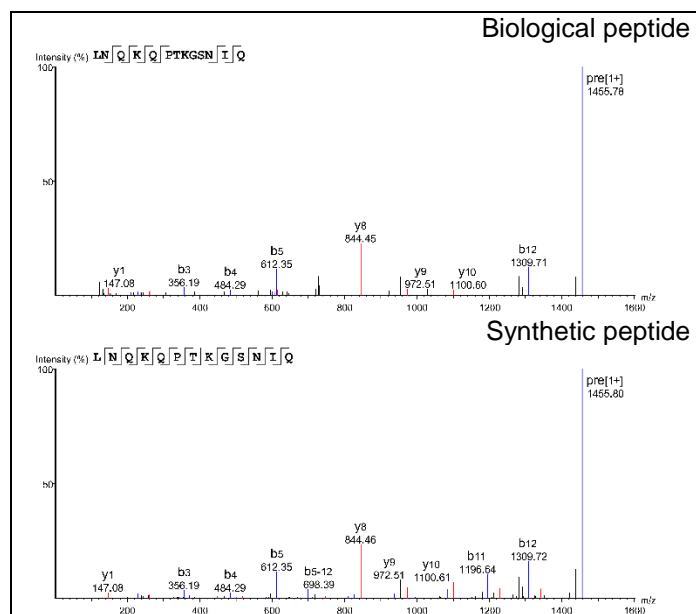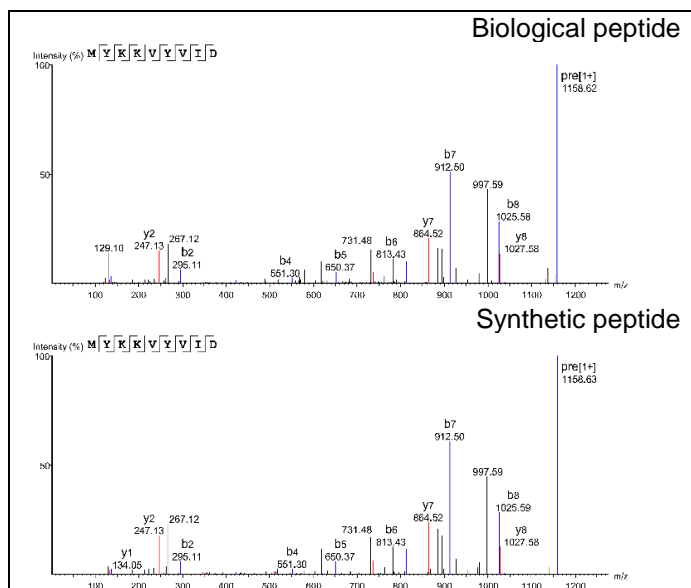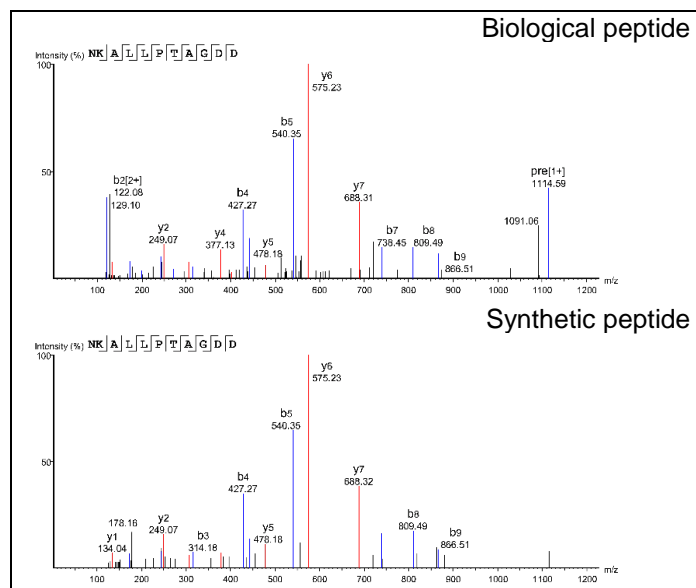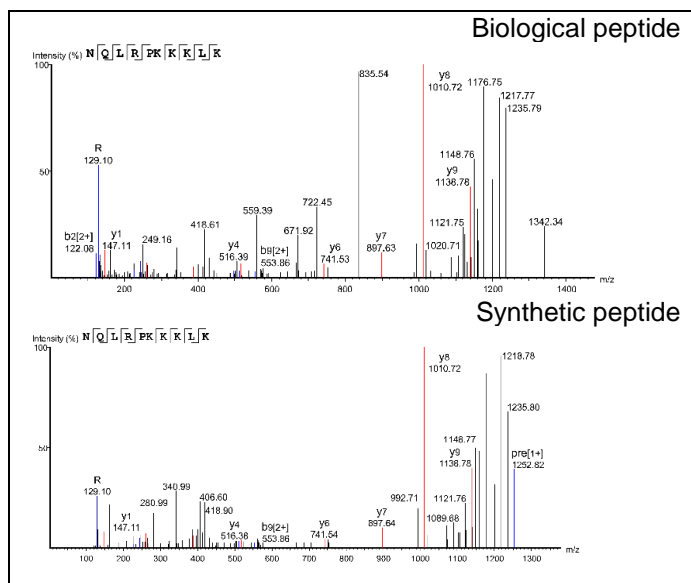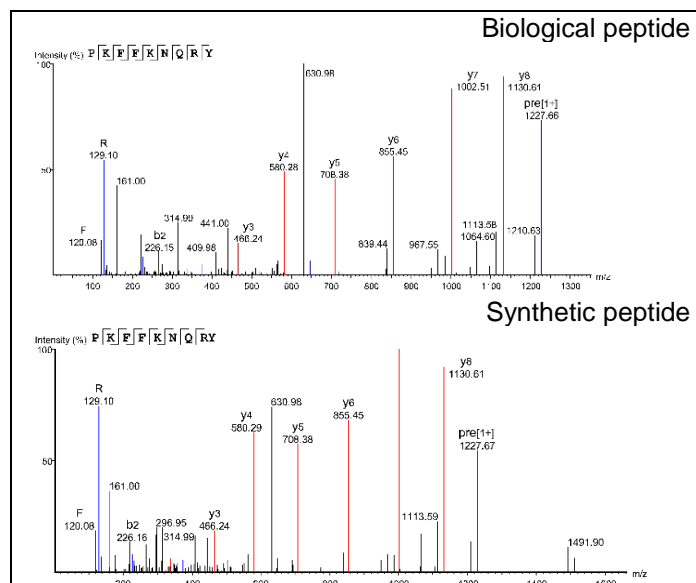

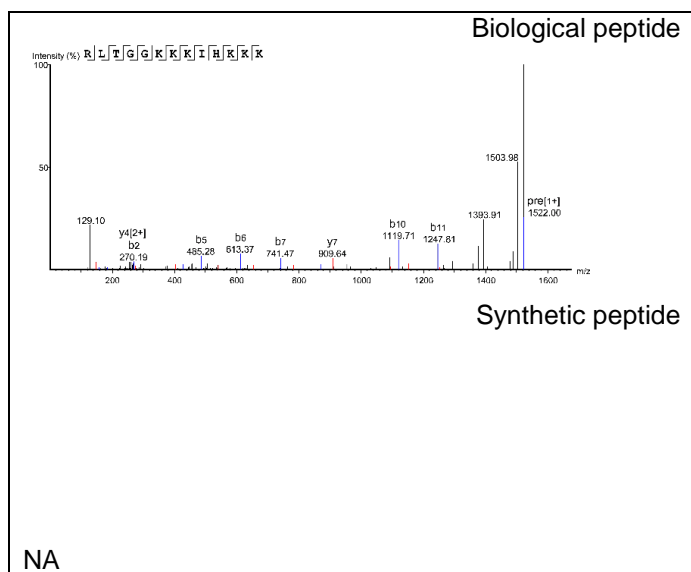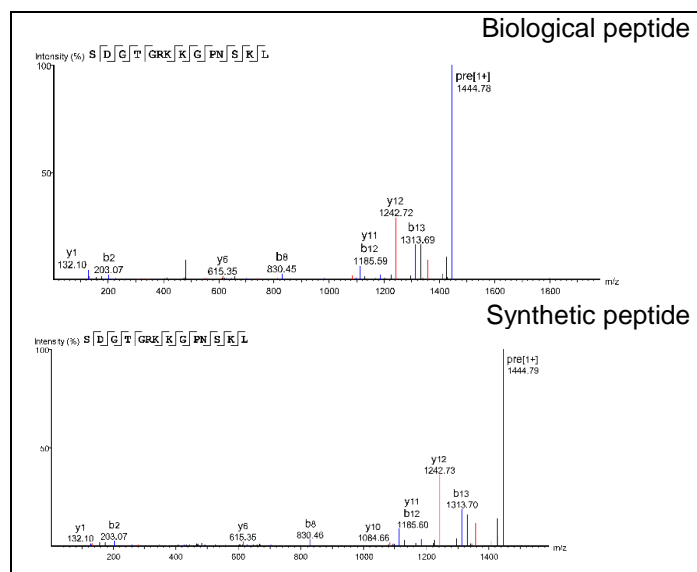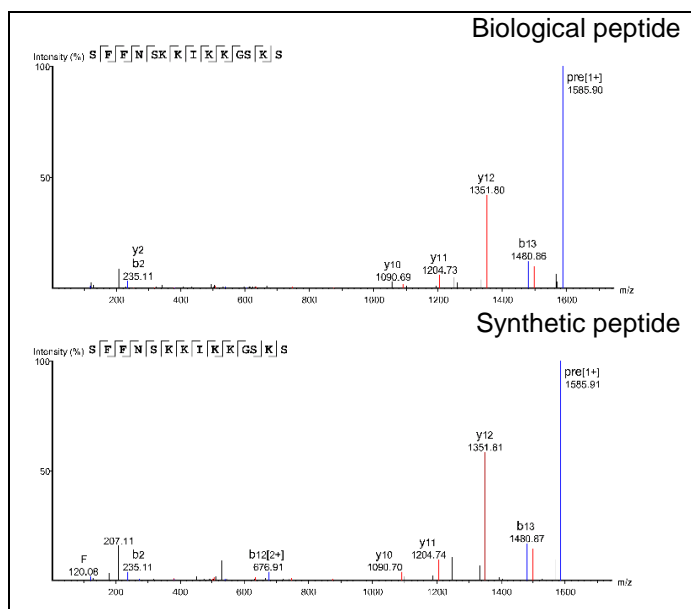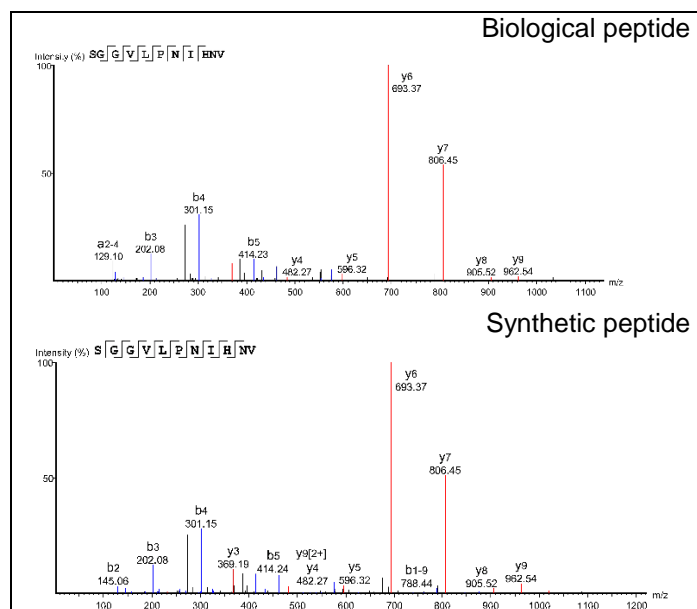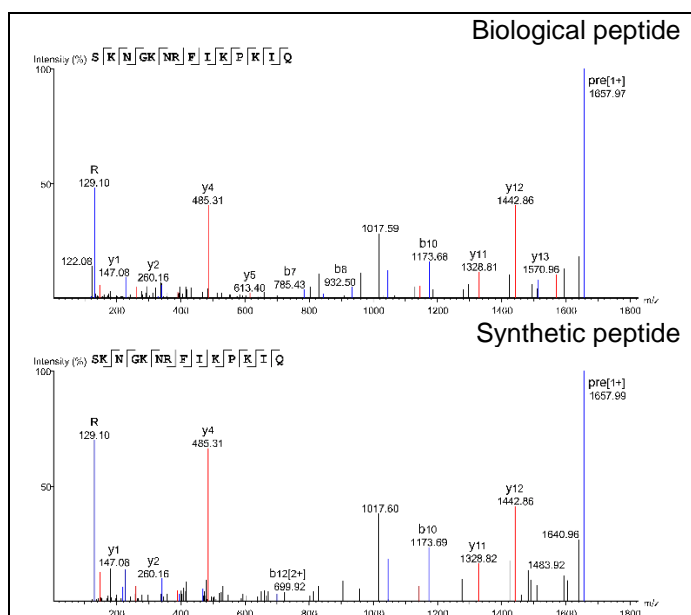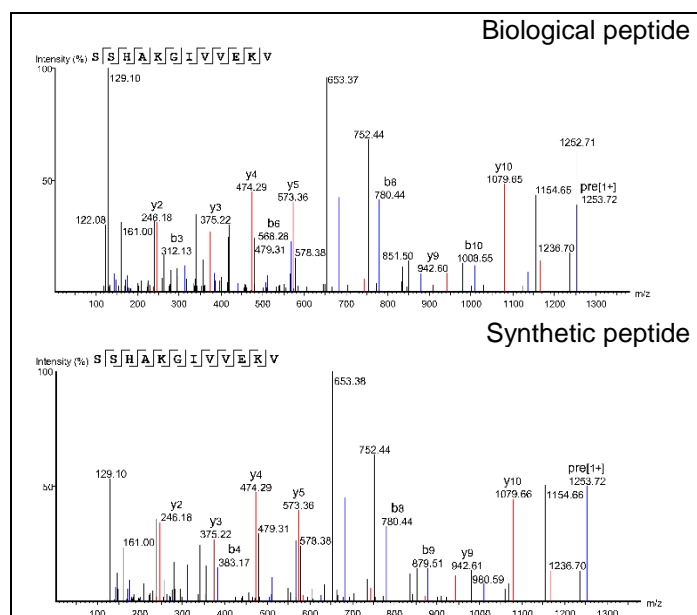

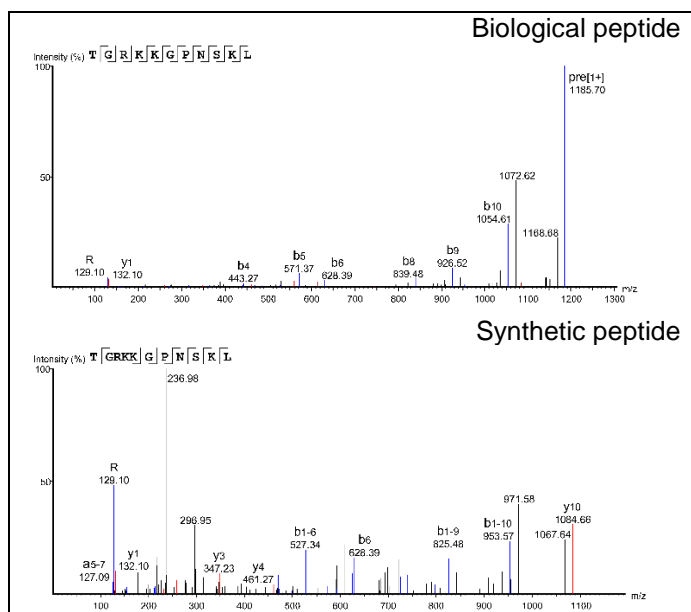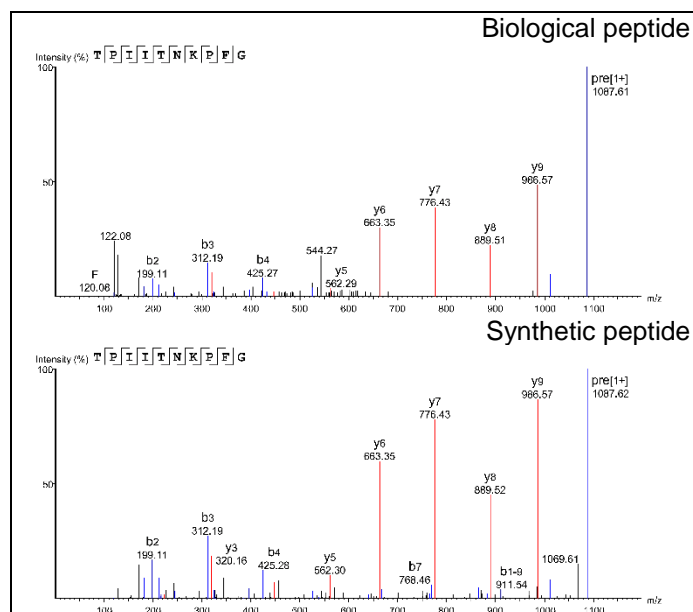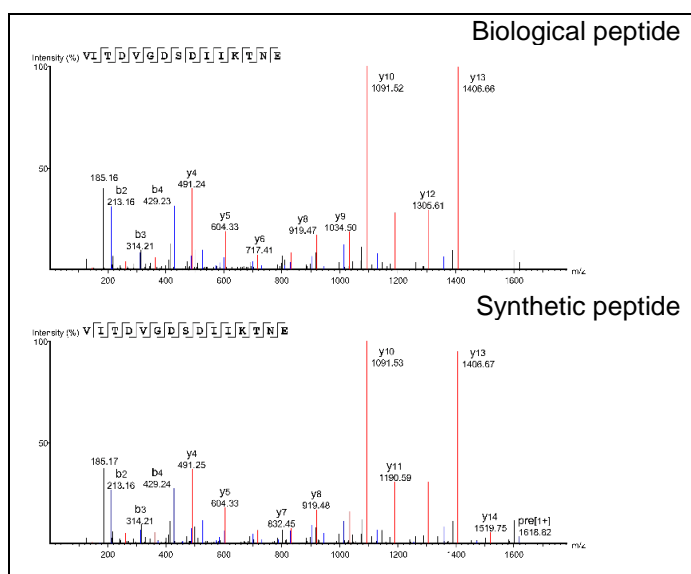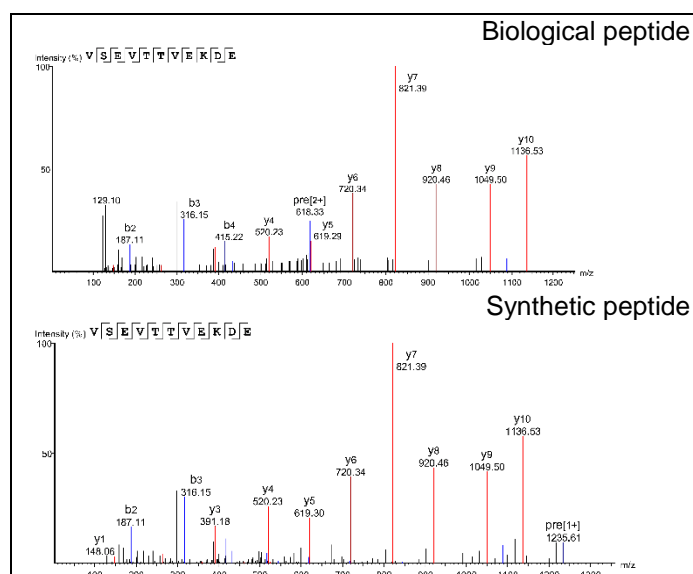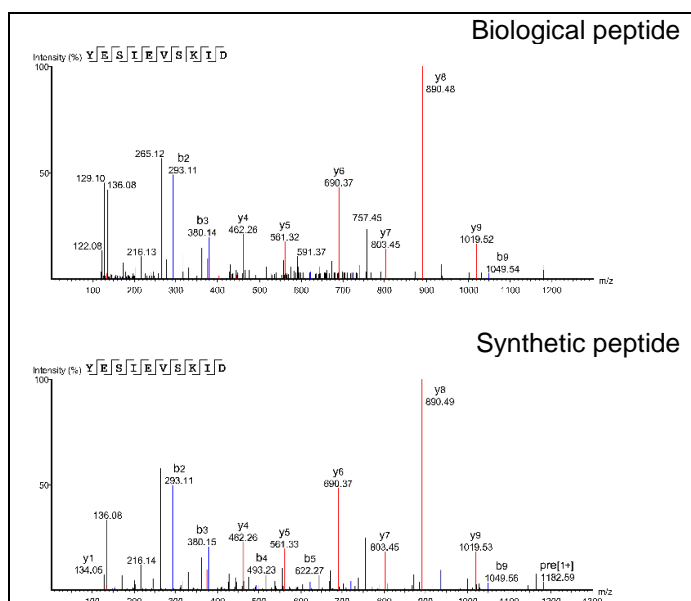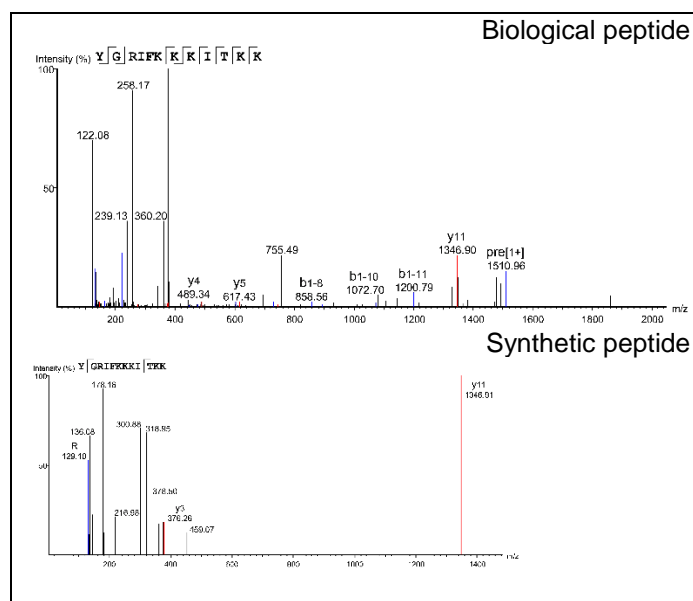

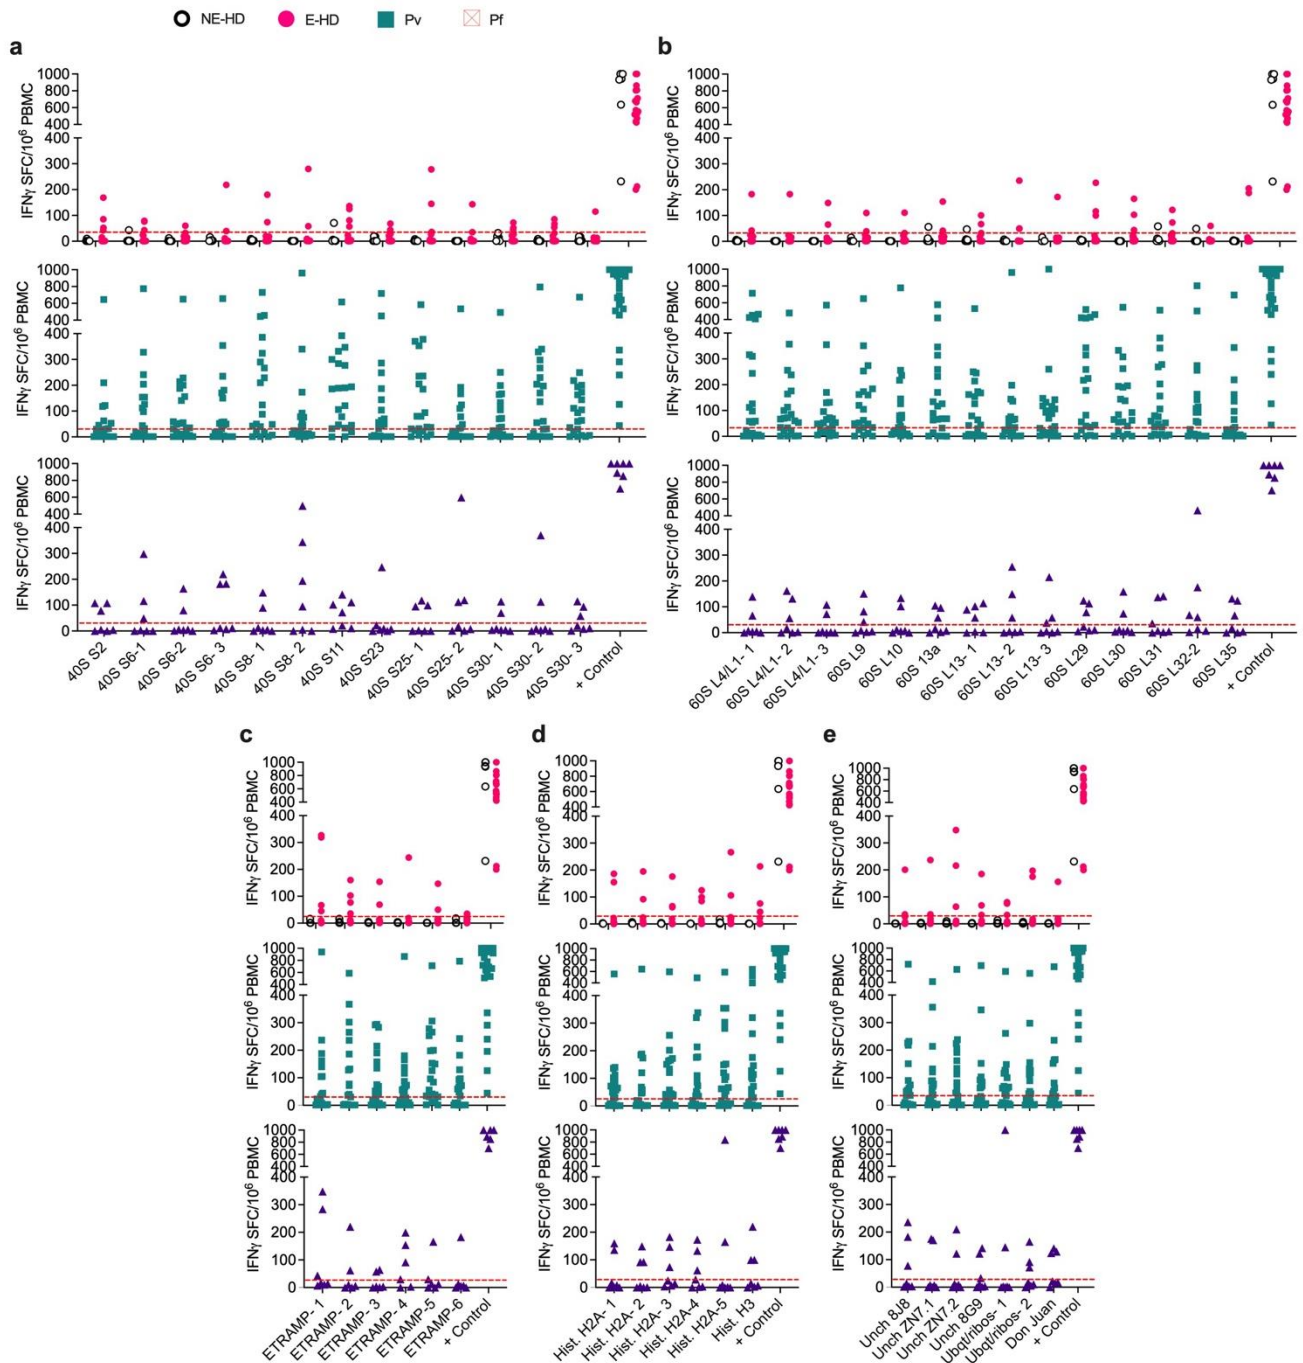

**Extended data figure 3 | Peptide validation by ex vivo ELISpot assay.** Selected peptides were tested using PBMC isolated from patients infected with *Plasmodium vivax* (*Pv*) (n = 24), *P. falciparum* (*Pf*) (n=7) and healthy donors from endemic (n = 15) and non-endemic (n = 6) regions for malaria. Cells were stimulated with **a**, 40S ribosomal protein peptides, **b**, 60S ribosomal protein peptides, **c**, ETRAMP peptides, **d**, Histone peptides, and **e**, other peptides. Each symbol represents one individual. Green squares are *Pv* patients, purple triangles are *Pf* patients, pink circles are endemic healthy donors, and white circles are non-endemic healthy donor. IFN $\gamma$  production was measured by spot counting and the results are expressed as spot-forming cells (SFC) by  $1 \times 10^6$  PBMC. Positive peptides were considered as responses that induced  $\geq 30$  spots in each patient- above the red dashed line.

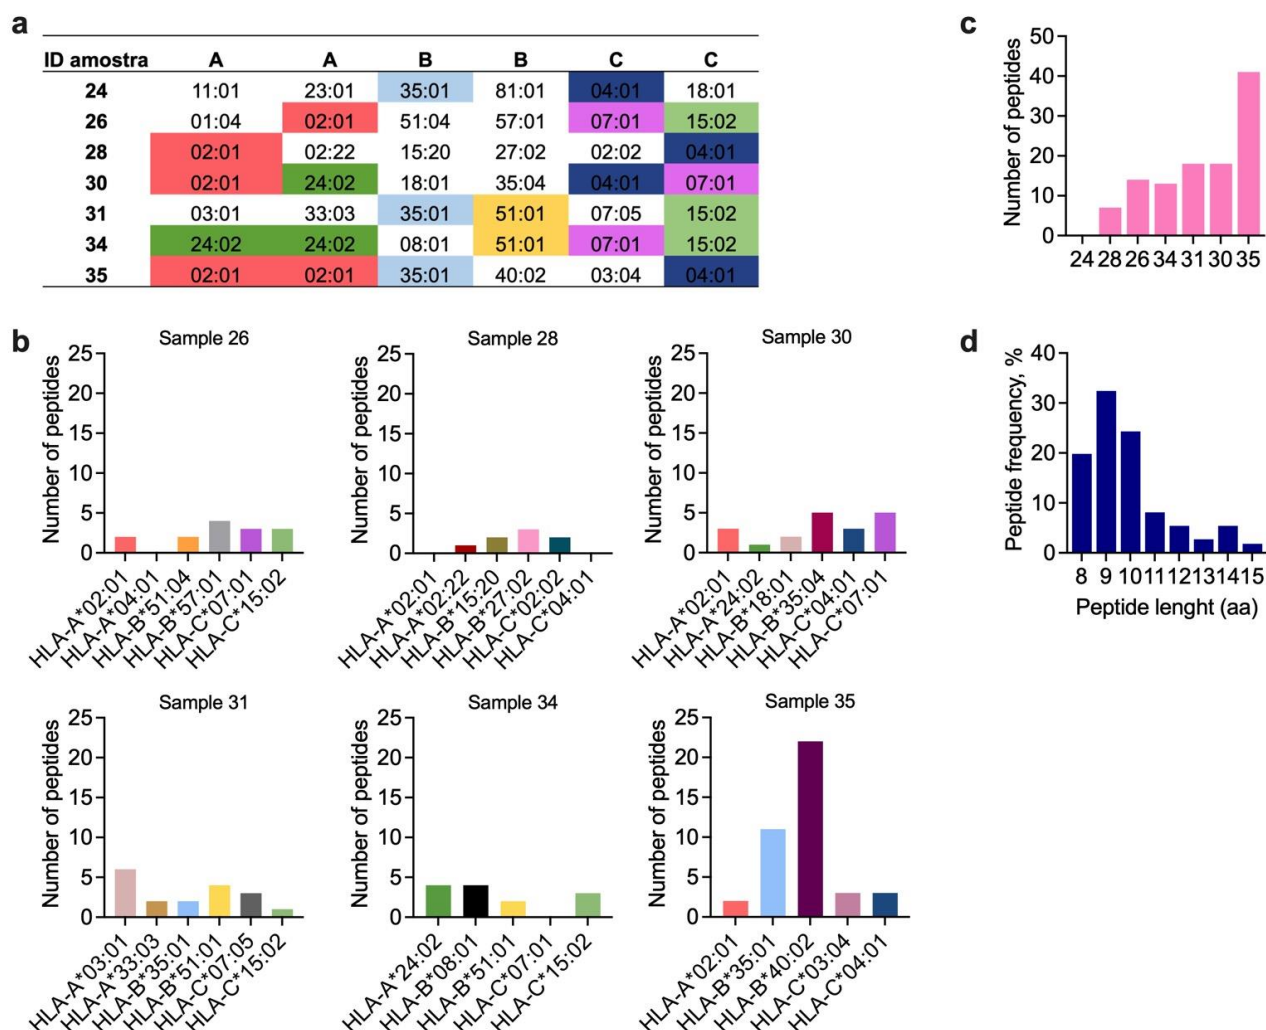

**Extended data figure 4 | *Plasmodium vivax* peptides are presented by different HLAs. a**, HLA-ABC genotyping typing of the 7 patients used in the immunopeptidome analysis. **b-d**, NetMHC bind analysis of peptides identified in each sample to their donor HLA type. **b**, Number of peptides identified as HLA-ABC binders for each sample. HLA-ABC genotyping of the donor of samples used in the immunopeptidomics assays. Alleles represented with same color mean that they were shared across different samples.

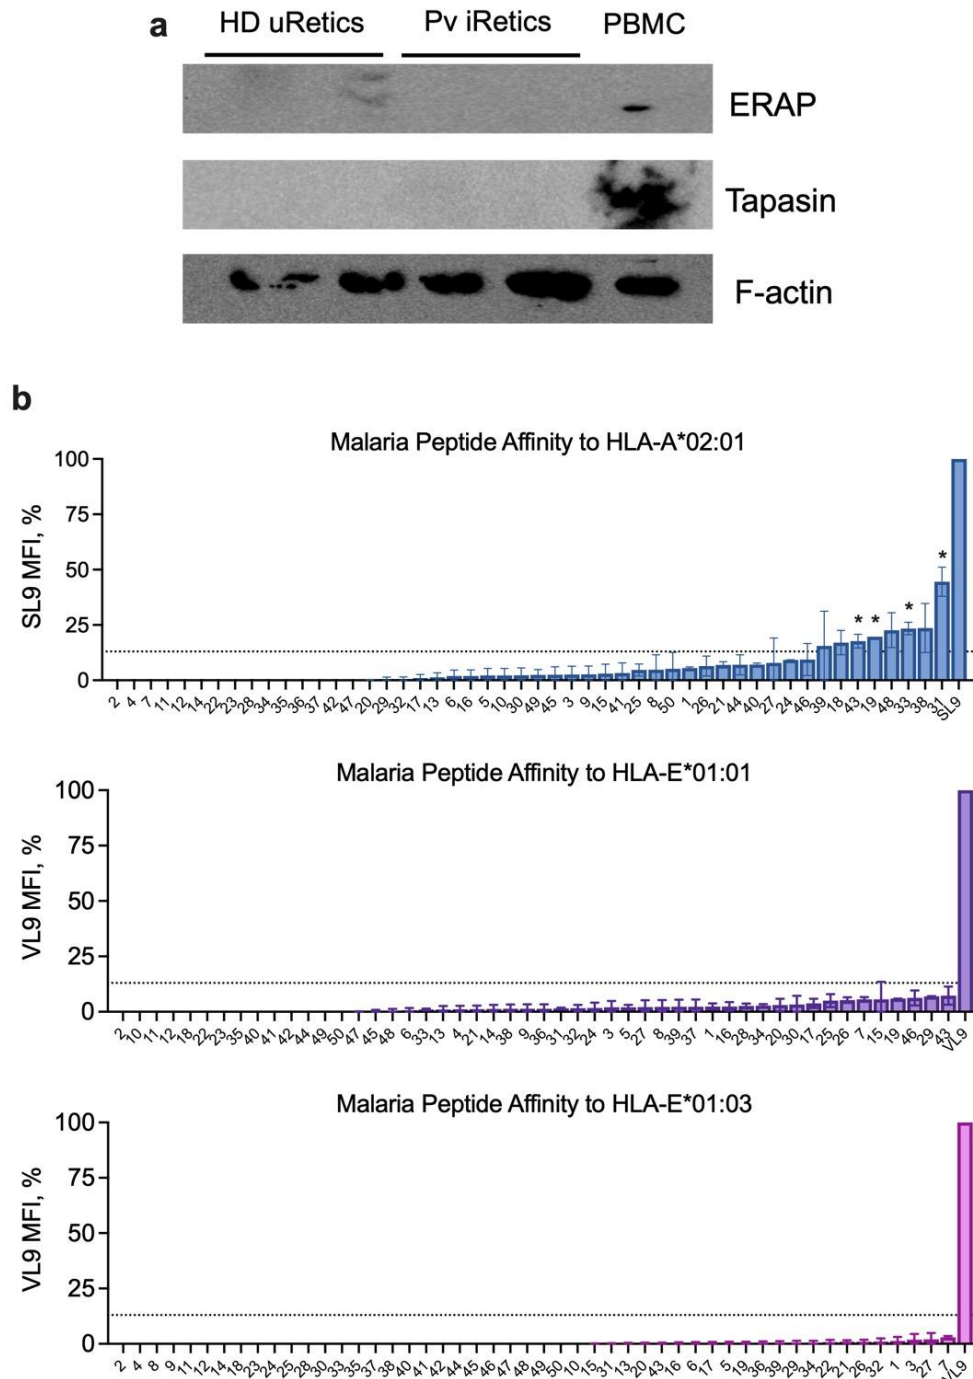

**Extended data figure 5 | Tapasin and ERAP1 expression on reticulocytes.** Western blot of cell lysates from two healthy donors (HD): uninfected Retics (uRetics) and PBMC; and three *Plasmodium vivax*-infected reticulocytes (Pv iRetics) from three patients were probed for the antigen processing protein Tapasin and Endoplasmic reticulum aminopeptidase 1 (ERAP1). PBMC was used as positive control. F-actin was loaded as endogen protein expression control. *In vitro* binding assay of all selected peptides pulsed in an HLA-A\*02:01, HLA-E\*01:01, and HLA-E\*01:03 cell line, including control peptides. Those peptides marked with asterisk were considered HLA-A: 0201 binders by *in silico* affinity predictions.



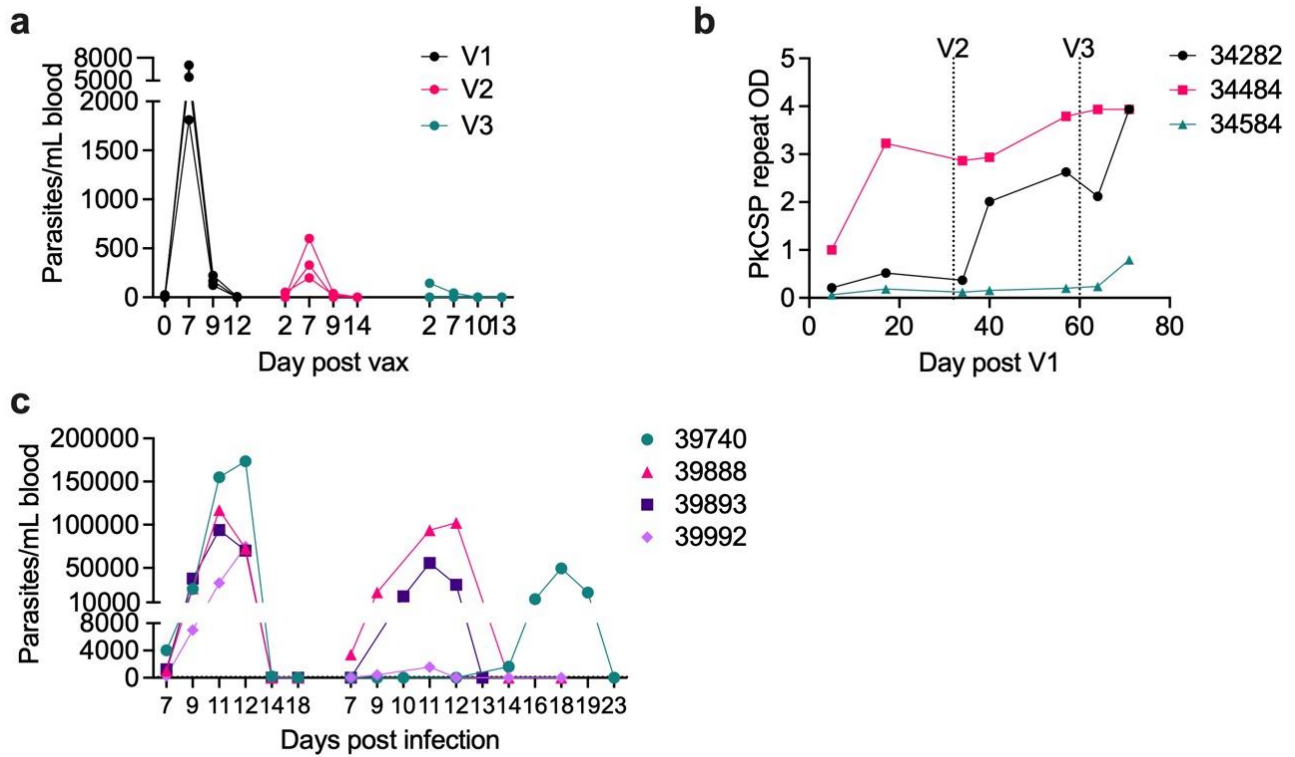

**Extended data figure 6 | Parasitemia during *Plasmodium knowlesi* (*Pk*) and *P. cynomolgi* (*Pcy*) infection of non-human primates. a, Parasitemia of *Pk* as measured by qRT-PCR following each immunization. b, Antibodies to *Pk* CSP repeat region throughout immunization as measured by single dilution ELISA OD value. c, Parasitemia of *Pcy* as measured by Giemsa-stained thin smears.**



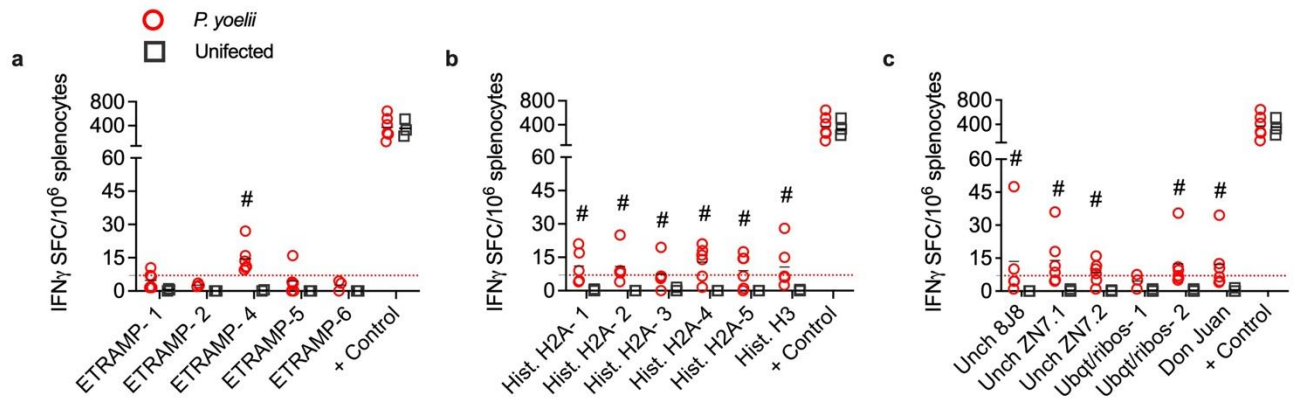

**Extended data figure 7 | Peptide validation by *ex vivo* IFN $\gamma$  ELISpot in mouse model.** Immunogenicity in *Plasmodium yoelii* (*Py*) infected mice. Mice were intraperitoneally injected with  $10^5$  *Py* iRBC. At 12 days post-infection (dpi), mouse splenocytes were isolated and incubated with selected peptides. Cells were stimulated with **a**, ETRAMP peptides, **b**, Histone peptides and **c**, Miscellaneous peptides. Each symbol represents one individual. Red circles are *Py* infected mice (n=6), and black ones are non-infected mice (n=3). IFN $\gamma$  production was measured by spot counting, and the results are expressed as SFC by  $1 \times 10^6$  splenocytes. Positive peptides (#) were considered as responses that induced  $\geq 10$  spots in each mouse – above the red dashed line – and  $P \geq 0.05$  by multiple unpaired student *t* tests.

## MAIN FIGURES

- Figure 1 | Peptide identification and immunogenicity validation.  
Figure 2 | Classical and non-classical HLA peptide binders  
Figure 3 | Novel *Plasmodium* antigens are recognized by T cells elicited during *P. knowlesi* and *P. cynomolgi* infection of non-human primates.  
Figure 4 | Antigen validation in the *P. yoelii* malaria experimental model.

## EXTENDED DATA TABLES

- Extended data table 1 | *Plasmodium falciparum* homology  
Extended data table 2 | Primers used for *Plasmodium falciparum* liver stage expression

## EXTENDED DATA FIGURES

- Extended data figure 1 | Antigen gene expression in humanized mouse livers infected with *P. falciparum*.  
Extended data figure 2 | Spectral match validation  
Extended data figure 3 | Peptide validation by *ex vivo* ELISpot assay.  
Extended data figure 4 | *Pv* peptides are presented by different HLAs  
Extended data figure 5 | Tapasin and ERAP1 expression on reticulocytes  
Extended data figure 6 | Parasitemia during *P. knowlesi* and *P. cynomolgi* infection of non-human primates.  
Extended data figure 7 | Peptide validation by *ex vivo* IFN $\gamma$  ELISpot in mouse model.

## SUPPLEMENTARY INFORMATION (SI)

- Supplementary information 1 | Clinical information  
Supplementary information 2 | Identified peptides  
Supplementary information 3 | *Plasmodium vivax* orthologous gene expression in parasite life cycle.  
Supplementary information 4 | Selected peptides used for *in vitro* stimulation  
Supplementary information 5 | HLA binding
