# Supplementary material for: Identification of cross-stage, cross-species malaria CD8+ T cell antigens
Source: Research Square preprint supplement (doi:10.21203/rs.3.rs-6682089/v1), 2025-05-30
Supplement: Supplementary file 2 [file 033b98dcb4c67db62bddf8f4.xlsx]

## Sheet: Pv Unique peptides
Peptide	-10lgP	Mass	Length	ppm	m/z	Z	RT	Intensity	Fraction	Id	Scan	from Chimera	Source File	Accession	PTM	AScore	Found By		8	69
VSEVTTVEKDE	28.83	1234.59	11	-1	618.303	2	30.23	373000	1	841166	F1:11513	No	FL1029_IPP114_PB_CB_vivax_1_even.raw	tr|A5K306|A5K306_PLAVS 60S ribosomal protein L9 putative OS=Plasmodium vivax (strain Salvador I) OX=126793 GN=PVX_116715 PE=4 SV=1			PEAKS DB
LETYQNM(+15.99)KIQKQTP	41.31	1736.88	14	0.3	869.446	2	28.73	2030000	1	840466	F1:10922	No	FL1029_IPP114_PB_CB_vivax_1_even.raw	tr|A5K3U1|A5K3U1_PLAVS 40S ribosomal protein S2 putative OS=Plasmodium vivax (strain Salvador I) OX=126793 GN=PVX_118145 PE=3 SV=1	Oxidation (M)	M7:Oxidation (M):1000.00	PEAKS PTM
GRKSTIKPA	16.05	956.577	9	-0.7	319.866	3	21	283000	1	837595	F1:7941	No	FL1029_IPP114_PB_CB_vivax_1_even.raw	tr|A5K4B5|A5K4B5_PLAVS 60S ribosomal protein L36 OS=Plasmodium vivax (strain Salvador I) OX=126793 GN=PVX_091145 PE=3 SV=1			PEAKS DB
KK(+28.03)AAPKKVAAP	21.62	1135.74	11	1.1	568.88	2	19.89	317000	1	837188	F1:7520	No	FL1029_IPP114_PB_CB_vivax_1_even.raw	tr|A5K5D6|A5K5D6_PLAVS Tryptophan-rich antigen (Pv-fam-a) OS=Plasmodium vivax (strain Salvador I) OX=126793 GN=PVX_092995 PE=4 SV=1	Dimethylation(KR)	K2:Dimethylation(KR):0.00	PEAKS PTM
KVPVPPTQAKKPKKN	27.41	1659.02	15	-1.3	415.762	4	23.46	327000	1	838435	F1:8779	No	FL1029_IPP114_PB_CB_vivax_1_even.raw	tr|A5K7L8|A5K7L8_PLAVS Histone H2A OS=Plasmodium vivax (strain Salvador I) OX=126793 GN=PVX_095190 PE=3 SV=1			PEAKS DB
GLNQKQPTKGSNIQ	36.93	1511.81	14	2.4	756.912	2	24.5	467000	1	838814	F1:9298	No	FL1029_IPP114_PB_CB_vivax_1_even.raw	tr|A5KBH5|A5KBH5_PLAVS Early transcribed membrane protein (ETRAMP) OS=Plasmodium vivax (strain Salvador I) OX=126793 GN=PVX_003565 PE=4 SV=1			PEAKS DB
NQKQPTKGSNIQ	21.45	1341.7	12	2.2	671.859	2	21.38	222000	1	837706	F1:8096	No	FL1029_IPP114_PB_CB_vivax_1_even.raw	tr|A5KBH5|A5KBH5_PLAVS Early transcribed membrane protein (ETRAMP) OS=Plasmodium vivax (strain Salvador I) OX=126793 GN=PVX_003565 PE=4 SV=1			PEAKS DB
Q(-17.03)KQPTKGSNIQ	18.33	1210.63	11	1.4	606.323	2	24.1	357000	1	838666	F1:9146	No	FL1029_IPP114_PB_CB_vivax_1_even.raw	tr|A5KBH5|A5KBH5_PLAVS Early transcribed membrane protein (ETRAMP) OS=Plasmodium vivax (strain Salvador I) OX=126793 GN=PVX_003565 PE=4 SV=1	Pyro-glu from Q	Q1:Pyro-glu from Q:1000.00	PEAKS PTM
GKVHGSLARA	18.29	994.567	10	-2.1	332.529	3	22.86	156000	1	838215	F1:8648	No	FL1029_IPP114_PB_CB_vivax_1_even.raw	tr|A5KBT5|A5KBT5_PLAVS 40S ribosomal protein S30 OS=Plasmodium vivax (strain Salvador I) OX=126793 GN=PVX_002590 PE=3 SV=1			PEAKS DB
VITDVGDSDIIKTNE	24.96	1617.81	15	0.3	809.912	2	41.36	302000	1	844943	F1:15856	No	FL1029_IPP114_PB_CB_vivax_1_even.raw	tr|A5KCD7|A5KCD7_PLAVS 60S ribosomal protein L30 putative OS=Plasmodium vivax (strain Salvador I) OX=126793 GN=PVX_001835 PE=4 SV=1			PEAKS DB
KGKDTCCC	17.27	856.324	8	-1.7	429.169	2	20.31	92300	2	747482	F2:7705	No	FL1029_IPP114_PB_CB_vivax_1_odd.raw	tr|A5K9Y3|A5K9Y3_PLAVS Uncharacterized protein OS=Plasmodium vivax (strain Salvador I) OX=126793 GN=PVX_081615 PE=4 SV=1			PEAKS DB
ANKALLPTAGDD	42.14	1184.6	12	2.6	593.311	2	34.62	754000	2	752723	F2:13215	No	FL1029_IPP114_PB_CB_vivax_1_odd.raw	tr|A5KAZ9|A5KAZ9_PLAVS 60S ribosomal subunit protein L4/L1 putative OS=Plasmodium vivax (strain Salvador I) OX=126793 GN=PVX_097915 PE=4 SV=1			PEAKS DB
DSPGGEAN	15.49	745.288	8	1	746.296	1	59.03	69900	2	761205	F2:22538	No	FL1029_IPP114_PB_CB_vivax_1_odd.raw	tr|A5KBE4|A5KBE4_PLAVS Uncharacterized protein OS=Plasmodium vivax (strain Salvador I) OX=126793 GN=PVX_119765 PE=4 SV=1			PEAKS DB
LNQKQPTKGSNIQ	19.07	1454.78	13	2.1	728.401	2	23.47	151000	2	748600	F2:8914	No	FL1029_IPP114_PB_CB_vivax_1_odd.raw	tr|A5KBH5|A5KBH5_PLAVS Early transcribed membrane protein (ETRAMP) OS=Plasmodium vivax (strain Salvador I) OX=126793 GN=PVX_003565 PE=4 SV=1			PEAKS DB
VGNILLGV	15.32	783.485	8	-3.1	784.49	1	50.69	78400000	2	758349	F2:19458	No	FL1029_IPP114_PB_CB_vivax_1_odd.raw	tr|A5KD48|A5KD48_PLAVS Variable surface protein Vir14 putative OS=Plasmodium vivax (strain Salvador I) OX=126793 GN=PVX_169270 PE=4 SV=1			PEAKS DB
GTPIEKLHPI	19.78	1103.63	10	-2.1	552.823	2	34.61	86300	3	864951	F3:13216	No	FL1029_IPP114_PB_CB_vivax_2_even.raw	tr|A5JZN9|A5JZN9_PLAVS 60S ribosomal protein L13 putative OS=Plasmodium vivax (strain Salvador I) OX=126793 GN=PVX_123070 PE=3 SV=1			PEAKS DB
KNIKSKNGIG	18.43	1057.62	10	0.2	529.82	2	21.19	236000	3	860150	F3:8019	No	FL1029_IPP114_PB_CB_vivax_2_even.raw	tr|A5JZN9|A5JZN9_PLAVS 60S ribosomal protein L13 putative OS=Plasmodium vivax (strain Salvador I) OX=126793 GN=PVX_123070 PE=3 SV=1			PEAKS DB
KHEKPKKLNAKLR	41	1588.99	13	0.7	398.255	4	25.7	908000	3	861762	F3:9785	No	FL1029_IPP114_PB_CB_vivax_2_even.raw	tr|A5K0Z7|A5K0Z7_PLAVS 60S ribosomal protein family L5 putative OS=Plasmodium vivax (strain Salvador I) OX=126793 GN=PVX_085275 PE=3 SV=1			PEAKS DB
KHEKPKKLNAKLRK	28.49	1717.08	14	0	430.278	4	26.2		3	861950	F3:9940	No	FL1029_IPP114_PB_CB_vivax_2_even.raw	tr|A5K0Z7|A5K0Z7_PLAVS 60S ribosomal protein family L5 putative OS=Plasmodium vivax (strain Salvador I) OX=126793 GN=PVX_085275 PE=3 SV=1			PEAKS DB
AAAAASGRSK(+27.99)KKKWG	20.26	1543.86	15	1.4	515.627	3	21.5	174000	3	860251	F3:8125	No	FL1029_IPP114_PB_CB_vivax_2_even.raw	tr|A5K124|A5K124_PLAVS 40S ribosomal protein S25 putative OS=Plasmodium vivax (strain Salvador I) OX=126793 GN=PVX_085420 PE=4 SV=1	Formylation	K10:Formylation:11.06	PEAKS PTM
GKGKNKEKL	31.18	1000.6	9	1.9	501.31	2	20.21	7940000	3	859818	F3:7625	No	FL1029_IPP114_PB_CB_vivax_2_even.raw	tr|A5K124|A5K124_PLAVS 40S ribosomal protein S25 putative OS=Plasmodium vivax (strain Salvador I) OX=126793 GN=PVX_085420 PE=4 SV=1			PEAKS DB
GKGKNKEKLNHA	22.19	1322.74	12	-0.4	441.921	3	19.84	863000	3	859697	F3:7495	No	FL1029_IPP114_PB_CB_vivax_2_even.raw	tr|A5K124|A5K124_PLAVS 40S ribosomal protein S25 putative OS=Plasmodium vivax (strain Salvador I) OX=126793 GN=PVX_085420 PE=4 SV=1			PEAKS DB
GKGKNKEKLNHAV	40.22	1421.81	13	-1.6	474.943	3	21.73	4950000	3	860374	F3:8453	No	FL1029_IPP114_PB_CB_vivax_2_even.raw	tr|A5K124|A5K124_PLAVS 40S ribosomal protein S25 putative OS=Plasmodium vivax (strain Salvador I) OX=126793 GN=PVX_085420 PE=4 SV=1			PEAKS DB
GKGKNKEKLNHAVF	20.11	1568.88	14	-0.1	523.967	3	28.47	490000	3	862766	F3:10476	No	FL1029_IPP114_PB_CB_vivax_2_even.raw	tr|A5K124|A5K124_PLAVS 40S ribosomal protein S25 putative OS=Plasmodium vivax (strain Salvador I) OX=126793 GN=PVX_085420 PE=4 SV=1			PEAKS DB
NKEKLNHAV	20.6	1051.58	9	0.8	526.796	2	22.71	155000	3	860713	F3:8586	No	FL1029_IPP114_PB_CB_vivax_2_even.raw	tr|A5K124|A5K124_PLAVS 40S ribosomal protein S25 putative OS=Plasmodium vivax (strain Salvador I) OX=126793 GN=PVX_085420 PE=4 SV=1			PEAKS DB
AQKIKKKKKLTPA	21	1480.98	13	-2.3	494.667	3	23.31	175000	3	860947	F3:8677	No	FL1029_IPP114_PB_CB_vivax_2_even.raw	tr|A5K197|A5K197_PLAVS Sperm-specific protein Don juan putative OS=Plasmodium vivax (strain Salvador I) OX=126793 GN=PVX_085790 PE=4 SV=1			PEAKS DB
EFCFTDYE	17.65	1052.38	8	3	527.199	2	47.84		3	869657	F3:18301	No	FL1029_IPP114_PB_CB_vivax_2_even.raw	tr|A5K1L8|A5K1L8_PLAVS C3H1-type domain-containing protein OS=Plasmodium vivax (strain Salvador I) OX=126793 GN=PVX_113265 PE=4 SV=1			PEAKS DB
SGGVLPNIHNV	15.29	1105.59	11	3.5	553.803	2	39.58		3	866701	F3:15124	No	FL1029_IPP114_PB_CB_vivax_2_even.raw	tr|A5K214|A5K214_PLAVS Histone H2A OS=Plasmodium vivax (strain Salvador I) OX=126793 GN=PVX_114015 PE=3 SV=1			PEAKS DB
AIEPSLAQLAQK	24.94	1267.71	12	0.8	634.865	2	41.44	147000	3	867366	F3:15841	No	FL1029_IPP114_PB_CB_vivax_2_even.raw	tr|A5K2R4|A5K2R4_PLAVS Ubiquitin/ribosomal putative OS=Plasmodium vivax (strain Salvador I) OX=126793 GN=PVX_115255 PE=4 SV=1			PEAKS DB
GKKKGADKEKK	17.15	1215.73	11	-0.5	608.872	2	19.27	102000	3	859488	F3:7275	No	FL1029_IPP114_PB_CB_vivax_2_even.raw	tr|A5K303|A5K303_PLAVS 60S ribosomal protein L23a putative OS=Plasmodium vivax (strain Salvador I) OX=126793 GN=PVX_116700 PE=3 SV=1			PEAKS DB
IHKIKK(+119.04)VVR	20.87	1238.8	9	-4.8	620.403	2	51.41	236000	3	871028	F3:19685	No	FL1029_IPP114_PB_CB_vivax_2_even.raw	tr|A5K347|A5K347_PLAVS Exported protein 2 putative OS=Plasmodium vivax (strain Salvador I) OX=126793 GN=PVX_116915 PE=4 SV=1	Pyridylacetyl	K6:Pyridylacetyl:16.66	PEAKS PTM
KSNDRSYYT	15.04	1132.51	9	3.9	567.267	2	31.86		3	863980	F3:12137	No	FL1029_IPP114_PB_CB_vivax_2_even.raw	tr|A5K3K0|A5K3K0_PLAVS Ferlin putative OS=Plasmodium vivax (strain Salvador I) OX=126793 GN=PVX_117685 PE=4 SV=1			PEAKS DB
LETYQNMKIQKQTP	27.28	1720.88	14	1.5	861.449	2	32.57	194000	3	864232	F3:12405	No	FL1029_IPP114_PB_CB_vivax_2_even.raw	tr|A5K3U1|A5K3U1_PLAVS 40S ribosomal protein S2 putative OS=Plasmodium vivax (strain Salvador I) OX=126793 GN=PVX_118145 PE=3 SV=1			PEAKS DB
YAANWGGT	15.76	838.361	8	-4.6	420.186	2	34.1		3	864790	F3:13004	No	FL1029_IPP114_PB_CB_vivax_2_even.raw	tr|A5K4L2|A5K4L2_PLAVS Uncharacterized protein OS=Plasmodium vivax (strain Salvador I) OX=126793 GN=PVX_091630 PE=4 SV=1			PEAKS DB
RTVGVSKKKGA	29.93	1129.69	11	-1	377.571	3	20.07	169000	3	859778	F3:7595	No	FL1029_IPP114_PB_CB_vivax_2_even.raw	tr|A5K4S2|A5K4S2_PLAVS 40S ribosomal protein S18 putative OS=Plasmodium vivax (strain Salvador I) OX=126793 GN=PVX_091925 PE=3 SV=1			PEAKS DB
KSAGADSKSLKKLD	29.76	1446.8	14	0.5	483.276	3	23.85	663000	3	861148	F3:9037	No	FL1029_IPP114_PB_CB_vivax_2_even.raw	tr|A5K676|A5K676_PLAVS Early transcribed membrane protein (ETRAMP) OS=Plasmodium vivax (strain Salvador I) OX=126793 GN=PVX_090230 PE=4 SV=1			PEAKS DB
SKGPDTPIITN	16.75	1141.6	11	1.4	571.807	2	32.58		3	864237	F3:12417	No	FL1029_IPP114_PB_CB_vivax_2_even.raw	tr|A5K676|A5K676_PLAVS Early transcribed membrane protein (ETRAMP) OS=Plasmodium vivax (strain Salvador I) OX=126793 GN=PVX_090230 PE=4 SV=1			PEAKS DB
TPIITNKPFG	36.66	1086.61	10	3.2	544.313	2	38.76	773000	3	866409	F3:14779	No	FL1029_IPP114_PB_CB_vivax_2_even.raw	tr|A5K676|A5K676_PLAVS Early transcribed membrane protein (ETRAMP) OS=Plasmodium vivax (strain Salvador I) OX=126793 GN=PVX_090230 PE=4 SV=1			PEAKS DB
AVKKVGKIVKKRT	36.85	1453.98	13	-1.1	364.502	4	24.55	1260000	3	861382	F3:9198	No	FL1029_IPP114_PB_CB_vivax_2_even.raw	tr|A5K6B0|A5K6B0_PLAVS 60S ribosomal protein L32 putative OS=Plasmodium vivax (strain Salvador I) OX=126793 GN=PVX_098640 PE=4 SV=1			PEAKS DB
AVKKVGKIVKKRTK	22.38	1582.08	14	-1.3	396.526	4	24.32	316000	3	861295	F3:9231	No	FL1029_IPP114_PB_CB_vivax_2_even.raw	tr|A5K6B0|A5K6B0_PLAVS 60S ribosomal protein L32 putative OS=Plasmodium vivax (strain Salvador I) OX=126793 GN=PVX_098640 PE=4 SV=1			PEAKS DB
MSCDTSASA	17.95	871.305	9	-0.4	436.66	2	33.24	155000	3	864468	F3:12665	No	FL1029_IPP114_PB_CB_vivax_2_even.raw	tr|A5K6C3|A5K6C3_PLAVS Mitochondrial carrier protein putative OS=Plasmodium vivax (strain Salvador I) OX=126793 GN=PVX_098705 PE=3 SV=1			PEAKS DB
AKVVKEVK	21.18	899.58	8	0.4	450.798	2	21.56	177000	3	860266	F3:8172	No	FL1029_IPP114_PB_CB_vivax_2_even.raw	tr|A5K6T4|A5K6T4_PLAVS 50S ribosomal protein L29 putative OS=Plasmodium vivax (strain Salvador I) OX=126793 GN=PVX_099510 PE=4 SV=1			PEAKS DB
WNYKAIRKIAK	15.6	1389.82	11	0.6	464.282	3	41.66		3	867441	F3:15916	No	FL1029_IPP114_PB_CB_vivax_2_even.raw	tr|A5K6T8|A5K6T8_PLAVS Para-aminobenzoic acid synthetase putative OS=Plasmodium vivax (strain Salvador I) OX=126793 GN=PVX_099530 PE=4 SV=1			PEAKS DB
SMCETTET	18.62	900.321	8	2.6	451.169	2	36.96		3	865766	F3:14104	No	FL1029_IPP114_PB_CB_vivax_2_even.raw	tr|A5K739|A5K739_PLAVS Uncharacterized protein OS=Plasmodium vivax (strain Salvador I) OX=126793 GN=PVX_094275 PE=4 SV=1			PEAKS DB
MYKKVYVID	31.39	1157.62	9	-0.5	579.815	2	33.14	215000	3	864438	F3:12635	No	FL1029_IPP114_PB_CB_vivax_2_even.raw	tr|A5K762|A5K762_PLAVS 60S ribosomal protein L13a putative OS=Plasmodium vivax (strain Salvador I) OX=126793 GN=PVX_094400 PE=3 SV=1			PEAKS DB
HLPTLKKEYRRKYAA	17.1	1873.07	15	-0.9	469.274	4	34.11	360000	3	864794	F3:13084	No	FL1029_IPP114_PB_CB_vivax_2_even.raw	tr|A5K851|A5K851_PLAVS 60S ribosomal protein L18a OS=Plasmodium vivax (strain Salvador I) OX=126793 GN=PVX_082965 PE=3 SV=1			PEAKS DB
GVKKDVAK	30.94	843.518	8	-0.2	422.766	2	19.87	3120000	3	859710	F3:7506	No	FL1029_IPP114_PB_CB_vivax_2_even.raw	tr|A5K858|A5K858_PLAVS 40S ribosomal protein S6 putative OS=Plasmodium vivax (strain Salvador I) OX=126793 GN=PVX_083000 PE=4 SV=1			PEAKS DB
KKNLKGAKAEEGK	24.84	1399.81	13	-0.6	467.612	3	19.84	449000	3	859701	F3:7507	No	FL1029_IPP114_PB_CB_vivax_2_even.raw	tr|A5K858|A5K858_PLAVS 40S ribosomal protein S6 putative OS=Plasmodium vivax (strain Salvador I) OX=126793 GN=PVX_083000 PE=4 SV=1			PEAKS DB
PQKEDAKGGKKKK	24.05	1440.84	13	0.8	481.288	3	19.37	110000	3	859518	F3:7320	No	FL1029_IPP114_PB_CB_vivax_2_even.raw	tr|A5K858|A5K858_PLAVS 40S ribosomal protein S6 putative OS=Plasmodium vivax (strain Salvador I) OX=126793 GN=PVX_083000 PE=4 SV=1			PEAKS DB
SKNGKNRFIKPK	18.85	1415.84	12	0.7	472.953	3	22.84	914000	3	860760	F3:8776	No	FL1029_IPP114_PB_CB_vivax_2_even.raw	tr|A5K858|A5K858_PLAVS 40S ribosomal protein S6 putative OS=Plasmodium vivax (strain Salvador I) OX=126793 GN=PVX_083000 PE=4 SV=1			PEAKS DB
SKQNFAKNKKKAAN	15.84	1575.88	14	0.5	526.302	3	19.67	943000	3	859636	F3:7447	No	FL1029_IPP114_PB_CB_vivax_2_even.raw	tr|A5K8F1|A5K8F1_PLAVS 60S ribosomal protein L17 putative OS=Plasmodium vivax (strain Salvador I) OX=126793 GN=PVX_083465 PE=3 SV=1			PEAKS DB
AKAVKKQKKTLKPV	20.61	1566.03	14	2.2	523.02	3	22.54	381000	3	860659	F3:8607	No	FL1029_IPP114_PB_CB_vivax_2_even.raw	tr|A5KAW8|A5KAW8_PLAVS 60S ribosomal protein L31 putative OS=Plasmodium vivax (strain Salvador I) OX=126793 GN=PVX_097760 PE=4 SV=1			PEAKS DB
FKKKAKTTKKIVLK	18.08	1660.11	14	-0.3	416.035	4	27.1	300000	3	862272	F3:10338	No	FL1029_IPP114_PB_CB_vivax_2_even.raw	tr|A5KB61|A5KB61_PLAVS 60S Ribosomal protein L44 putative OS=Plasmodium vivax (strain Salvador I) OX=126793 GN=PVX_119345 PE=3 SV=1			PEAKS DB
SSHAKGIVV	19.71	896.508	9	-0.4	449.261	2	27.07	220000	3	862259	F3:10291	No	FL1029_IPP114_PB_CB_vivax_2_even.raw	tr|A5KB86|A5KB86_PLAVS 40S ribosomal protein S23 putative OS=Plasmodium vivax (strain Salvador I) OX=126793 GN=PVX_119470 PE=3 SV=1			PEAKS DB
SSHAKGIVVEKV	30.11	1252.71	12	-0.2	418.579	3	27.51	376000	3	862412	F3:10449	No	FL1029_IPP114_PB_CB_vivax_2_even.raw	tr|A5KB86|A5KB86_PLAVS 40S ribosomal protein S23 putative OS=Plasmodium vivax (strain Salvador I) OX=126793 GN=PVX_119470 PE=3 SV=1			PEAKS DB
KKVAAGYKKLTD	30.02	1320.78	12	0.8	441.267	3	24.59	1060000	3	861397	F3:9289	No	FL1029_IPP114_PB_CB_vivax_2_even.raw	tr|A5KBH5|A5KBH5_PLAVS Early transcribed membrane protein (ETRAMP) OS=Plasmodium vivax (strain Salvador I) OX=126793 GN=PVX_003565 PE=4 SV=1			PEAKS DB
SLTTPAAVAAK	17.64	1028.59	11	-0.3	515.3	2	31.9	276000	3	863993	F3:12154	No	FL1029_IPP114_PB_CB_vivax_2_even.raw	tr|A5KBQ3|A5KBQ3_PLAVS 60S ribosomal protein L37a putative OS=Plasmodium vivax (strain Salvador I) OX=126793 GN=PVX_003955 PE=3 SV=1			PEAKS DB
GKVHGSLA	25.05	767.429	8	1.6	384.722	2	22.71	376000	3	860710	F3:8594	No	FL1029_IPP114_PB_CB_vivax_2_even.raw	tr|A5KBT5|A5KBT5_PLAVS 40S ribosomal protein S30 OS=Plasmodium vivax (strain Salvador I) OX=126793 GN=PVX_002590 PE=3 SV=1			PEAKS DB
GKVHGSLAR	24.12	923.53	9	2.1	308.851	3	21.56	304000	3	860263	F3:8159	No	FL1029_IPP114_PB_CB_vivax_2_even.raw	tr|A5KBT5|A5KBT5_PLAVS 40S ribosomal protein S30 OS=Plasmodium vivax (strain Salvador I) OX=126793 GN=PVX_002590 PE=3 SV=1			PEAKS DB
GTGRKKGPNSKL	39.98	1241.72	12	-1.8	414.913	3	20.89	2000000	3	860055	F3:7882	No	FL1029_IPP114_PB_CB_vivax_2_even.raw	tr|A5KBT5|A5KBT5_PLAVS 40S ribosomal protein S30 OS=Plasmodium vivax (strain Salvador I) OX=126793 GN=PVX_002590 PE=3 SV=1			PEAKS DB
RKKGPNSKL	18.1	1026.63	9	-1.3	343.217	3	20.79	489000	3	860031	F3:7857	No	FL1029_IPP114_PB_CB_vivax_2_even.raw	tr|A5KBT5|A5KBT5_PLAVS 40S ribosomal protein S30 OS=Plasmodium vivax (strain Salvador I) OX=126793 GN=PVX_002590 PE=3 SV=1			PEAKS DB
SDGTGRKKGPNSKL	35.14	1443.78	14	1.4	482.268	3	21.43	1640000	3	860225	F3:8090	No	FL1029_IPP114_PB_CB_vivax_2_even.raw	tr|A5KBT5|A5KBT5_PLAVS 40S ribosomal protein S30 OS=Plasmodium vivax (strain Salvador I) OX=126793 GN=PVX_002590 PE=3 SV=1			PEAKS DB
TGRKKGPNSKL	31.28	1184.7	11	-1.4	395.906	3	20.82	933000	3	860043	F3:7868	No	FL1029_IPP114_PB_CB_vivax_2_even.raw	tr|A5KBT5|A5KBT5_PLAVS 40S ribosomal protein S30 OS=Plasmodium vivax (strain Salvador I) OX=126793 GN=PVX_002590 PE=3 SV=1			PEAKS DB
SNMESDDAGDG	17.97	1096.36	11	2	549.189	2	47.37		3	869481	F3:18120	No	FL1029_IPP114_PB_CB_vivax_2_even.raw	tr|A5KC05|A5KC05_PLAVS Serine/threonine-specific protein kinase putative OS=Plasmodium vivax (strain Salvador I) OX=126793 GN=PVX_002945 PE=4 SV=1			PEAKS DB
AQKKPAAPETSA	24.14	1197.64	12	1.2	599.826	2	22.67	93200	3	860701	F3:8614	No	FL1029_IPP114_PB_CB_vivax_2_even.raw	tr|A5KC18|A5KC18_PLAVS Uncharacterized protein OS=Plasmodium vivax (strain Salvador I) OX=126793 GN=PVX_096030 PE=4 SV=1			PEAKS DB
NNDFQKLESYD	36.93	1371.59	11	1.4	686.805	2	39.49	227000	3	866669	F3:15078	No	FL1029_IPP114_PB_CB_vivax_2_even.raw	tr|A5KC18|A5KC18_PLAVS Uncharacterized protein OS=Plasmodium vivax (strain Salvador I) OX=126793 GN=PVX_096030 PE=4 SV=1			PEAKS DB
EEDGYPEEGY	24.77	1186.43	10	-4.1	594.22	2	38.74		3	866400	F3:14797	No	FL1029_IPP114_PB_CB_vivax_2_even.raw	tr|A5KCF9|A5KCF9_PLAVS Uncharacterized protein OS=Plasmodium vivax (strain Salvador I) OX=126793 GN=PVX_001950 PE=4 SV=1			PEAKS DB
NVCYRVCC	18.04	958.382	8	-1.7	480.198	2	37.12		4	820919	F4:14208	No	FL1029_IPP114_PB_CB_vivax_2_odd.raw	tr|A5JZ31|A5JZ31_PLAVS PI3K/PI4K domain-containing protein OS=Plasmodium vivax (strain Salvador I) OX=126793 GN=PVX_122030 PE=3 SV=1			PEAKS DB		11	51
HPGHQYPNALG	16.93	1189.56	11	0.8	595.789	2	28.33	149000	4	817768	F4:10819	No	FL1029_IPP114_PB_CB_vivax_2_odd.raw	tr|A5K043|A5K043_PLAVS Polyadenylate-binding protein OS=Plasmodium vivax (strain Salvador I) OX=126793 GN=PVX_123845 PE=3 SV=1			PEAKS DB
PLSNKKTVK	34.48	1013.62	9	-1.5	338.881	3	20.41	674000	4	814986	F4:7755	No	FL1029_IPP114_PB_CB_vivax_2_odd.raw	tr|A5K0Z6|A5K0Z6_PLAVS Ribosomal protein L7a putative OS=Plasmodium vivax (strain Salvador I) OX=126793 GN=PVX_085270 PE=4 SV=1			PEAKS DB
KNKEKLNHAVF	17.98	1326.74	11	0.4	443.254	3	27.87	167000	4	817598	F4:10612	No	FL1029_IPP114_PB_CB_vivax_2_odd.raw	tr|A5K124|A5K124_PLAVS 40S ribosomal protein S25 putative OS=Plasmodium vivax (strain Salvador I) OX=126793 GN=PVX_085420 PE=4 SV=1			PEAKS DB
KNSYSAASK	15.81	954.477	9	2.1	478.247	2	25.76	244000	4	816859	F4:9822	No	FL1029_IPP114_PB_CB_vivax_2_odd.raw	tr|A5K1B6|A5K1B6_PLAVS Uncharacterized protein OS=Plasmodium vivax (strain Salvador I) OX=126793 GN=PVX_085885 PE=4 SV=1			PEAKS DB
KSNSISLS	19.09	834.445	8	0	418.23	2	28.2	326000	4	817733	F4:10753	No	FL1029_IPP114_PB_CB_vivax_2_odd.raw	tr|A5K1B7|A5K1B7_PLAVS RHOMBOID-like protein OS=Plasmodium vivax (strain Salvador I) OX=126793 GN=PVX_085890 PE=3 SV=1			PEAKS DB
GSKQVHVV	36.66	852.482	8	-1	427.248	2	24.45	405000	4	816427	F4:9309	No	FL1029_IPP114_PB_CB_vivax_2_odd.raw	tr|A5K1E3|A5K1E3_PLAVS 40S ribosomal protein S8 OS=Plasmodium vivax (strain Salvador I) OX=126793 GN=PVX_086020 PE=3 SV=1			PEAKS DB
AIEPSLAQLAQKYN(-.98)	36.08	1543.84	14	2.6	772.927	2	45.11	490000	4	823758	F4:17274	No	FL1029_IPP114_PB_CB_vivax_2_odd.raw	tr|A5K2R4|A5K2R4_PLAVS Ubiquitin/ribosomal putative OS=Plasmodium vivax (strain Salvador I) OX=126793 GN=PVX_115255 PE=4 SV=1	Amidation	N14:Amidation:1000.00	PEAKS PTM
KGAEQNGREPNG	18.67	1255.59	12	-1.9	628.801	2	30.46		4	818575	F4:11628	No	FL1029_IPP114_PB_CB_vivax_2_odd.raw	tr|A5K2Z4|A5K2Z4_PLAVS Uncharacterized protein OS=Plasmodium vivax (strain Salvador I) OX=126793 GN=PVX_116655 PE=4 SV=1			PEAKS DB
ADKEKKQLY	36.59	1121.61	9	0.6	561.812	2	23.54	473000	4	816135	F4:8953	No	FL1029_IPP114_PB_CB_vivax_2_odd.raw	tr|A5K303|A5K303_PLAVS 60S ribosomal protein L23a putative OS=Plasmodium vivax (strain Salvador I) OX=126793 GN=PVX_116700 PE=3 SV=1			PEAKS DB
DKEKKQLY	30.95	1050.57	8	2.3	526.294	2	23.91	261000	4	816248	F4:9093	No	FL1029_IPP114_PB_CB_vivax_2_odd.raw	tr|A5K303|A5K303_PLAVS 60S ribosomal protein L23a putative OS=Plasmodium vivax (strain Salvador I) OX=126793 GN=PVX_116700 PE=3 SV=1			PEAKS DB
KQVGGKNQQV	16.17	1084.6	10	1.4	543.308	2	21.26	225000	4	815268	F4:8083	No	FL1029_IPP114_PB_CB_vivax_2_odd.raw	tr|A5K303|A5K303_PLAVS 60S ribosomal protein L23a putative OS=Plasmodium vivax (strain Salvador I) OX=126793 GN=PVX_116700 PE=3 SV=1			PEAKS DB
GDTELSGRF	23.54	980.456	9	-0.1	491.235	2	35.27	366000	4	820261	F4:13493	No	FL1029_IPP114_PB_CB_vivax_2_odd.raw	tr|A5K3E2|A5K3E2_PLAVS 50S ribosomal protein S28e putative OS=Plasmodium vivax (strain Salvador I) OX=126793 GN=PVX_117390 PE=3 SV=1			PEAKS DB
PKFFKNQRY	24.07	1226.66	9	0.4	409.893	3	30.97	1120000	4	818743	F4:11712	No	FL1029_IPP114_PB_CB_vivax_2_odd.raw	tr|A5K3F2|A5K3F2_PLAVS 60S ribosomal protein L29 OS=Plasmodium vivax (strain Salvador I) OX=126793 GN=PVX_117440 PE=3 SV=1			PEAKS DB
KPSRTTIT	20.27	902.519	8	-1.2	452.266	2	39.95	137000	4	821920	F4:15509	No	FL1029_IPP114_PB_CB_vivax_2_odd.raw	tr|A5K3K0|A5K3K0_PLAVS Ferlin putative OS=Plasmodium vivax (strain Salvador I) OX=126793 GN=PVX_117685 PE=4 SV=1			PEAKS DB
KSNGKRDPK	15.2	1028.57	9	3.8	515.295	2	35.79		4	820448	F4:13694	No	FL1029_IPP114_PB_CB_vivax_2_odd.raw	tr|A5K3V9|A5K3V9_PLAVS RNA helicase putative OS=Plasmodium vivax (strain Salvador I) OX=126793 GN=PVX_118230 PE=4 SV=1			PEAKS DB
GRKSTIKPATGIAV	18.78	1397.84	14	3.1	699.927	2	29.86	246000	4	818355	F4:11389	No	FL1029_IPP114_PB_CB_vivax_2_odd.raw	tr|A5K4B5|A5K4B5_PLAVS 60S ribosomal protein L36 OS=Plasmodium vivax (strain Salvador I) OX=126793 GN=PVX_091145 PE=3 SV=1			PEAKS DB
YYDNGDNHN	17.58	1110.4	9	-4.3	556.205	2	42.59		4	822854	F4:16322	No	FL1029_IPP114_PB_CB_vivax_2_odd.raw	tr|A5K6C2|A5K6C2_PLAVS Uncharacterized protein OS=Plasmodium vivax (strain Salvador I) OX=126793 GN=PVX_098700 PE=4 SV=1			PEAKS DB
SFFNSKKIKKGSKS	22.88	1584.9	14	1.4	529.308	3	26.99	647000	4	817323	F4:10263	No	FL1029_IPP114_PB_CB_vivax_2_odd.raw	tr|A5K7Q0|A5K7Q0_PLAVS 40S ribosomal protein S11 putative OS=Plasmodium vivax (strain Salvador I) OX=126793 GN=PVX_095350 PE=3 SV=1			PEAKS DB
AGKKDGAKKEVA	43.62	1200.68	12	0.5	401.235	3	19.67	1540000	4	814702	F4:7482	No	FL1029_IPP114_PB_CB_vivax_2_odd.raw	tr|A5K858|A5K858_PLAVS 40S ribosomal protein S6 putative OS=Plasmodium vivax (strain Salvador I) OX=126793 GN=PVX_083000 PE=4 SV=1			PEAKS DB
KDAGKKDAGKKD	37.47	1259.68	12	-0.6	420.901	3	19.26	1550000	4	814551	F4:7322	No	FL1029_IPP114_PB_CB_vivax_2_odd.raw	tr|A5K858|A5K858_PLAVS 40S ribosomal protein S6 putative OS=Plasmodium vivax (strain Salvador I) OX=126793 GN=PVX_083000 PE=4 SV=1			PEAKS DB
KKDAGKKDAGKKD	30.16	1387.78	13	0.1	463.6	3	19.3	574000	4	814566	F4:7339	No	FL1029_IPP114_PB_CB_vivax_2_odd.raw	tr|A5K858|A5K858_PLAVS 40S ribosomal protein S6 putative OS=Plasmodium vivax (strain Salvador I) OX=126793 GN=PVX_083000 PE=4 SV=1			PEAKS DB
KVDKKAPAKPQKED	41.14	1580.89	14	0.2	527.97	3	20.11	532000	4	814872	F4:7638	No	FL1029_IPP114_PB_CB_vivax_2_odd.raw	tr|A5K858|A5K858_PLAVS 40S ribosomal protein S6 putative OS=Plasmodium vivax (strain Salvador I) OX=126793 GN=PVX_083000 PE=4 SV=1			PEAKS DB
SKNGKNRFIKPKIQ	19.96	1656.98	14	-1.8	415.251	4	28.77	718000	4	817935	F4:10922	No	FL1029_IPP114_PB_CB_vivax_2_odd.raw	tr|A5K858|A5K858_PLAVS 40S ribosomal protein S6 putative OS=Plasmodium vivax (strain Salvador I) OX=126793 GN=PVX_083000 PE=4 SV=1			PEAKS DB
A(+42.01)TVRPVANVYST	21.54	1318.69	12	3.5	660.354	2	43.3	82700	4	823113	F4:16612	No	FL1029_IPP114_PB_CB_vivax_2_odd.raw	tr|A5KAZ9|A5KAZ9_PLAVS 60S ribosomal subunit protein L4/L1 putative OS=Plasmodium vivax (strain Salvador I) OX=126793 GN=PVX_097915 PE=4 SV=1	Acetylation (Protein N-term)	A1:Acetylation (Protein N-term):1000.00	PEAKS PTM
DANKALLPTAGDD	32.16	1299.63	13	0.9	650.823	2	38.71	126000	4	821485	F4:14830	No	FL1029_IPP114_PB_CB_vivax_2_odd.raw	tr|A5KAZ9|A5KAZ9_PLAVS 60S ribosomal subunit protein L4/L1 putative OS=Plasmodium vivax (strain Salvador I) OX=126793 GN=PVX_097915 PE=4 SV=1			PEAKS DB
NKALLPTAGDD	43.43	1113.57	11	2.6	557.792	2	34.67	367000	4	820047	F4:13248	No	FL1029_IPP114_PB_CB_vivax_2_odd.raw	tr|A5KAZ9|A5KAZ9_PLAVS 60S ribosomal subunit protein L4/L1 putative OS=Plasmodium vivax (strain Salvador I) OX=126793 GN=PVX_097915 PE=4 SV=1			PEAKS DB
EVASISEKH	16.95	998.503	9	1.7	500.26	2	21.92		4	815532	F4:8333	No	FL1029_IPP114_PB_CB_vivax_2_odd.raw	tr|A5KBH6|A5KBH6_PLAVS Uncharacterized protein OS=Plasmodium vivax (strain Salvador I) OX=126793 GN=PVX_003570 PE=4 SV=1			PEAKS DB
GKVHGSLARAG	25.44	1051.59	11	-1.5	351.536	3	22.37	289000	4	815691	F4:8442	No	FL1029_IPP114_PB_CB_vivax_2_odd.raw	tr|A5KBT5|A5KBT5_PLAVS 40S ribosomal protein S30 OS=Plasmodium vivax (strain Salvador I) OX=126793 GN=PVX_002590 PE=3 SV=1			PEAKS DB
AAQKKPAAPETSA	16.27	1268.67	13	1.2	635.344	2	22.77	99700	4	815828	F4:8670	No	FL1029_IPP114_PB_CB_vivax_2_odd.raw	tr|A5KC18|A5KC18_PLAVS Uncharacterized protein OS=Plasmodium vivax (strain Salvador I) OX=126793 GN=PVX_096030 PE=4 SV=1			PEAKS DB
KKAAQKKPAAPETSA	22.96	1524.86	15	1	509.295	3	21.19	321000	4	815251	F4:8063	No	FL1029_IPP114_PB_CB_vivax_2_odd.raw	tr|A5KC18|A5KC18_PLAVS Uncharacterized protein OS=Plasmodium vivax (strain Salvador I) OX=126793 GN=PVX_096030 PE=4 SV=1			PEAKS DB
KPAAPETSA	21.54	870.445	9	0.6	436.23	2	23.71	188000	4	816194	F4:9034	No	FL1029_IPP114_PB_CB_vivax_2_odd.raw	tr|A5KC18|A5KC18_PLAVS Uncharacterized protein OS=Plasmodium vivax (strain Salvador I) OX=126793 GN=PVX_096030 PE=4 SV=1			PEAKS DB
Q(-17.03)KKPAAPETSA	31.56	1109.57	11	-3.1	555.791	2	25.59	182000	4	816786	F4:9749	No	FL1029_IPP114_PB_CB_vivax_2_odd.raw	tr|A5KC18|A5KC18_PLAVS Uncharacterized protein OS=Plasmodium vivax (strain Salvador I) OX=126793 GN=PVX_096030 PE=4 SV=1	Pyro-glu from Q	Q1:Pyro-glu from Q:1000.00	PEAKS PTM
LNALENPPKPG	34.88	1148.62	11	0.2	575.317	2	33.4	183000	4	819581	F4:12754	No	FL1029_IPP114_PB_CB_vivax_2_odd.raw	tr|A5KC19|A5KC19_PLAVS Uncharacterized protein OS=Plasmodium vivax (strain Salvador I) OX=126793 GN=PVX_096035 PE=4 SV=1			PEAKS DB
KGGSGGGNIKK(-2.02)	18.56	999.546	11	0.2	500.78	2	23.61	144000	4	816152	F4:8988	No	FL1029_IPP114_PB_CB_vivax_2_odd.raw	tr|A5KE19|A5KE19_PLAVS Merozoite capping protein 1 putative OS=Plasmodium vivax (strain Salvador I) OX=126793 GN=PVX_111355 PE=4 SV=1	2-amino-3-oxo-butanoic_acid	K11:2-amino-3-oxo-butanoic_acid:37.50	PEAKS PTM
SQKLYTKVA	25.64	1036.59	9	-0.4	519.303	2	27.34	151000	5	772471	F5:10401	No	FL1029_IPP114_PB_CB_vivax_3_even.raw	tr|A5K124|A5K124_PLAVS 40S ribosomal protein S25 putative OS=Plasmodium vivax (strain Salvador I) OX=126793 GN=PVX_085420 PE=4 SV=1			PEAKS DB
KVINMK(+27.99)KAPN	16.33	1169.66	10	4	585.839	2	41.32		5	777515	F5:15822	No	FL1029_IPP114_PB_CB_vivax_3_even.raw	tr|A5K197|A5K197_PLAVS Sperm-specific protein Don juan putative OS=Plasmodium vivax (strain Salvador I) OX=126793 GN=PVX_085790 PE=4 SV=1	Formylation	K6:Formylation:14.02	PEAKS PTM
AIEPSLAQLAQKY	17.96	1430.78	13	1.1	716.396	2	46.78		5	779434	F5:17932	No	FL1029_IPP114_PB_CB_vivax_3_even.raw	tr|A5K2R4|A5K2R4_PLAVS Ubiquitin/ribosomal putative OS=Plasmodium vivax (strain Salvador I) OX=126793 GN=PVX_115255 PE=4 SV=1			PEAKS DB
TGLLRGAK	16.76	814.502	8	0.1	408.259	2	26.01	212000	5	771990	F5:9879	No	FL1029_IPP114_PB_CB_vivax_3_even.raw	tr|A5K9J0|A5K9J0_PLAVS 60S ribosomal protein L8 putative OS=Plasmodium vivax (strain Salvador I) OX=126793 GN=PVX_080405 PE=4 SV=1			PEAKS DB
GKAGKGTGSF	19.06	908.472	10	-0.6	455.243	2	23.04	167000	5	770930	F5:8733	No	FL1029_IPP114_PB_CB_vivax_3_even.raw	tr|A5KA70|A5KA70_PLAVS Ribosomal protein L37 OS=Plasmodium vivax (strain Salvador I) OX=126793 GN=PVX_087860 PE=3 SV=1			PEAKS DB
GKAGKGTGSFG	15.26	965.493	11	-1.3	483.753	2	22.67	200000	5	770814	F5:8550	No	FL1029_IPP114_PB_CB_vivax_3_even.raw	tr|A5KA70|A5KA70_PLAVS Ribosomal protein L37 OS=Plasmodium vivax (strain Salvador I) OX=126793 GN=PVX_087860 PE=3 SV=1			PEAKS DB
GSGKPSGL	20.27	701.371	8	-1.8	351.692	2	25.26	126000	5	771742	F5:9588	No	FL1029_IPP114_PB_CB_vivax_3_even.raw	tr|A5KB86|A5KB86_PLAVS 40S ribosomal protein S23 putative OS=Plasmodium vivax (strain Salvador I) OX=126793 GN=PVX_119470 PE=3 SV=1			PEAKS DB
GKVHGSLARAGK	17.29	1179.68	12	-2.3	394.234	3	21.67	221000	5	770460	F5:8203	No	FL1029_IPP114_PB_CB_vivax_3_even.raw	tr|A5KBT5|A5KBT5_PLAVS 40S ribosomal protein S30 OS=Plasmodium vivax (strain Salvador I) OX=126793 GN=PVX_002590 PE=3 SV=1			PEAKS DB
KKGPNSKL	20.95	870.529	8	0.4	436.272	2	20.83	422000	5	770209	F5:7884	No	FL1029_IPP114_PB_CB_vivax_3_even.raw	tr|A5KBT5|A5KBT5_PLAVS 40S ribosomal protein S30 OS=Plasmodium vivax (strain Salvador I) OX=126793 GN=PVX_002590 PE=3 SV=1			PEAKS DB
VGDSDIIKTNE	28.03	1189.58	11	3.4	595.801	2	33.59		5	774914	F5:12816	No	FL1029_IPP114_PB_CB_vivax_3_even.raw	tr|A5KCD7|A5KCD7_PLAVS 60S ribosomal protein L30 putative OS=Plasmodium vivax (strain Salvador I) OX=126793 GN=PVX_001835 PE=4 SV=1			PEAKS DB
AVSAKNPAKK	15.79	1012.6	10	1.3	507.309	2	20.1	73600	6	945356	F6:7659	No	FL1029_IPP114_PB_CB_vivax_3_odd.raw	tr|A5K2H7|A5K2H7_PLAVS Elongation factor 1-alpha OS=Plasmodium vivax (strain Salvador I) OX=126793 GN=PVX_114830 PE=3 SV=1			PEAKS DB
LETYQN(+.98)M(+15.99)KIQKQTP	17.2	1737.86	14	1.9	580.295	3	29.57	859000	6	948881	F6:11273	No	FL1029_IPP114_PB_CB_vivax_3_odd.raw	tr|A5K3U1|A5K3U1_PLAVS 40S ribosomal protein S2 putative OS=Plasmodium vivax (strain Salvador I) OX=126793 GN=PVX_118145 PE=3 SV=1	Deamidation (NQ); Oxidation (M)	N6:Deamidation (NQ):0.00;M7:Oxidation (M):1000.00	PEAKS PTM
TKLVGKTED	16.34	989.539	9	1	495.777	2	23.87	219000	6	946699	F6:9101	No	FL1029_IPP114_PB_CB_vivax_3_odd.raw	tr|A5K9J0|A5K9J0_PLAVS 60S ribosomal protein L8 putative OS=Plasmodium vivax (strain Salvador I) OX=126793 GN=PVX_080405 PE=4 SV=1			PEAKS DB
FTHCTEHC	15.37	976.353	8	-3	489.182	2	40.92		6	952859	F6:15693	No	FL1029_IPP114_PB_CB_vivax_3_odd.raw	tr|A5KB28|A5KB28_PLAVS Uncharacterized protein OS=Plasmodium vivax (strain Salvador I) OX=126793 GN=PVX_098060 PE=4 SV=1			PEAKS DB
KGAAPKKGA(+21.98)	17.95	848.484	9	-0.4	425.249	2	26.78		6	947711	F6:10207	No	FL1029_IPP114_PB_CB_vivax_3_odd.raw	tr|A5KB38|A5KB38_PLAVS PRESAN domain-containing protein OS=Plasmodium vivax (strain Salvador I) OX=126793 GN=PVX_119225 PE=4 SV=1	Sodium adduct	A9:Sodium adduct:1000.00	PEAKS PTM
SDIIKTNE	15.66	918.466	8	0.2	460.24	2	29.44	496000	6	948808	F6:11243	No	FL1029_IPP114_PB_CB_vivax_3_odd.raw	tr|A5KCD7|A5KCD7_PLAVS 60S ribosomal protein L30 putative OS=Plasmodium vivax (strain Salvador I) OX=126793 GN=PVX_001835 PE=4 SV=1			PEAKS DB
DNNEHVVQEKTV	26.01	1410.67	12	-3.5	706.342	2	27.57		7	795055	F7:10467	No	FL1029_IPP114_PB_CB_vivax_4_even.raw	tr|A5JZN7|A5JZN7_PLAVS Alba domain-containing protein OS=Plasmodium vivax (strain Salvador I) OX=126793 GN=PVX_123060 PE=4 SV=1			PEAKS DB
GAFGKPNGV	19.14	845.439	9	0.1	423.727	2	30.4	571000	7	796211	F7:11558	No	FL1029_IPP114_PB_CB_vivax_4_even.raw	tr|A5K186|A5K186_PLAVS 60S ribosomal protein L10 putative OS=Plasmodium vivax (strain Salvador I) OX=126793 GN=PVX_085735 PE=4 SV=1			PEAKS DB
AQKIKKKKKLTPAKV	21.94	1708.14	15	0.3	428.044	4	27.26	480000	7	794926	F7:10133	No	FL1029_IPP114_PB_CB_vivax_4_even.raw	tr|A5K197|A5K197_PLAVS Sperm-specific protein Don juan putative OS=Plasmodium vivax (strain Salvador I) OX=126793 GN=PVX_085790 PE=4 SV=1			PEAKS DB
NAQLTKQKTKKVI	22.77	1498.92	13	0.6	500.647	3	24.6	166000	7	793972	F7:9328	No	FL1029_IPP114_PB_CB_vivax_4_even.raw	tr|A5K197|A5K197_PLAVS Sperm-specific protein Don juan putative OS=Plasmodium vivax (strain Salvador I) OX=126793 GN=PVX_085790 PE=4 SV=1			PEAKS DB
SLVKQRSNI	21.58	1043.61	9	0.7	522.812	2	26.89	2960000	7	794795	F7:10195	No	FL1029_IPP114_PB_CB_vivax_4_even.raw	tr|A5K199|A5K199_PLAVS Uncharacterized protein OS=Plasmodium vivax (strain Salvador I) OX=126793 GN=PVX_085800 PE=4 SV=1			PEAKS DB
KKIGKSKQID	17.33	1143.7	10	-1	382.239	3	20.63	217000	7	792578	F7:7808	No	FL1029_IPP114_PB_CB_vivax_4_even.raw	tr|A5K1E3|A5K1E3_PLAVS 40S ribosomal protein S8 OS=Plasmodium vivax (strain Salvador I) OX=126793 GN=PVX_086020 PE=3 SV=1			PEAKS DB
MVSGTTGSTAN	15.14	1024.45	11	-4.7	513.23	2	24.9	190000	7	794068	F7:9459	No	FL1029_IPP114_PB_CB_vivax_4_even.raw	tr|A5K1W8|A5K1W8_PLAVS Uncharacterized protein OS=Plasmodium vivax (strain Salvador I) OX=126793 GN=PVX_113780 PE=4 SV=1			PEAKS DB
LLPKKSQLKSG	18.21	1197.74	11	-1.8	400.255	3	25.31	228000	7	794220	F7:9592	No	FL1029_IPP114_PB_CB_vivax_4_even.raw	tr|A5K214|A5K214_PLAVS Histone H2A OS=Plasmodium vivax (strain Salvador I) OX=126793 GN=PVX_114015 PE=3 SV=1			PEAKS DB
NPFNRYPAY	23.25	1140.54	9	1.6	571.276	2	37.84	177000	7	798761	F7:14455	No	FL1029_IPP114_PB_CB_vivax_4_even.raw	tr|A5K436|A5K436_PLAVS Uncharacterized protein OS=Plasmodium vivax (strain Salvador I) OX=126793 GN=PVX_118625 PE=4 SV=1			PEAKS DB
AVKKVGKIV	19.08	940.643	9	-0.5	471.329	2	25.31	123000	7	794221	F7:9599	No	FL1029_IPP114_PB_CB_vivax_4_even.raw	tr|A5K6B0|A5K6B0_PLAVS 60S ribosomal protein L32 putative OS=Plasmodium vivax (strain Salvador I) OX=126793 GN=PVX_098640 PE=4 SV=1			PEAKS DB
EDYSPRKV	31.69	992.493	8	0	497.254	2	25.95	2060000	7	794454	F7:9832	No	FL1029_IPP114_PB_CB_vivax_4_even.raw	tr|A5K8G9|A5K8G9_PLAVS Uncharacterized protein OS=Plasmodium vivax (strain Salvador I) OX=126793 GN=PVX_083560 PE=4 SV=1			PEAKS DB
GKAGKGTGSFGK	21.2	1093.59	12	-1.2	365.536	3	20.93	111000	7	792698	F7:7920	No	FL1029_IPP114_PB_CB_vivax_4_even.raw	tr|A5KA70|A5KA70_PLAVS Ribosomal protein L37 OS=Plasmodium vivax (strain Salvador I) OX=126793 GN=PVX_087860 PE=3 SV=1			PEAKS DB
GKAGKGTGSFGKRNG	19.35	1420.75	15	-1.3	474.591	3	20.59	256000	7	792568	F7:7794	No	FL1029_IPP114_PB_CB_vivax_4_even.raw	tr|A5KA70|A5KA70_PLAVS Ribosomal protein L37 OS=Plasmodium vivax (strain Salvador I) OX=126793 GN=PVX_087860 PE=3 SV=1			PEAKS DB
ATEAATNMNA	17	992.423	10	-2.9	993.428	1	33.44	845000	7	797314	F7:12760	No	FL1029_IPP114_PB_CB_vivax_4_even.raw	tr|A5KA75|A5KA75_PLAVS Rhoptry associated membrane antigen putative OS=Plasmodium vivax (strain Salvador I) OX=126793 GN=PVX_087885 PE=4 SV=1			PEAKS DB
GGGM(+15.99)FNPTKV	30.65	1022.49	10	-1.6	512.249	2	32.74	303000	7	797079	F7:12456	No	FL1029_IPP114_PB_CB_vivax_4_even.raw	tr|A5KAZ9|A5KAZ9_PLAVS 60S ribosomal subunit protein L4/L1 putative OS=Plasmodium vivax (strain Salvador I) OX=126793 GN=PVX_097915 PE=4 SV=1	Oxidation (M)	M4:Oxidation (M):1000.00	PEAKS PTM
KNSLTNFAVR(-.98)	16.28	1147.65	10	0.4	574.831	2	31.47	690000	7	796626	F7:11955	No	FL1029_IPP114_PB_CB_vivax_4_even.raw	tr|A5KAZ9|A5KAZ9_PLAVS 60S ribosomal subunit protein L4/L1 putative OS=Plasmodium vivax (strain Salvador I) OX=126793 GN=PVX_097915 PE=4 SV=1	Amidation	R10:Amidation:1000.00	PEAKS PTM
NKNSLTNFAVR(-.98)	26.05	1261.69	11	0.9	631.852	2	31.54	652000	7	796653	F7:11980	No	FL1029_IPP114_PB_CB_vivax_4_even.raw	tr|A5KAZ9|A5KAZ9_PLAVS 60S ribosomal subunit protein L4/L1 putative OS=Plasmodium vivax (strain Salvador I) OX=126793 GN=PVX_097915 PE=4 SV=1	Amidation	R11:Amidation:1000.00	PEAKS PTM
NSLTNFAVR(-.98)	17.47	1019.55	9	1.2	510.784	2	35.94	70600	7	798113	F7:13715	No	FL1029_IPP114_PB_CB_vivax_4_even.raw	tr|A5KAZ9|A5KAZ9_PLAVS 60S ribosomal subunit protein L4/L1 putative OS=Plasmodium vivax (strain Salvador I) OX=126793 GN=PVX_097915 PE=4 SV=1	Amidation	R9:Amidation:1000.00	PEAKS PTM
LGGLNQKQPT	35.32	1054.58	10	0.1	528.296	2	28.4	244000	7	795391	F7:10792	No	FL1029_IPP114_PB_CB_vivax_4_even.raw	tr|A5KBH5|A5KBH5_PLAVS Early transcribed membrane protein (ETRAMP) OS=Plasmodium vivax (strain Salvador I) OX=126793 GN=PVX_003565 PE=4 SV=1			PEAKS DB
YFDLSRASF	18.42	1104.52	9	2	553.27	2	47.65		7	802230	F7:18242	No	FL1029_IPP114_PB_CB_vivax_4_even.raw	tr|A5KBP3|A5KBP3_PLAVS Transmission-blocking target antigen Pfs230 putative OS=Plasmodium vivax (strain Salvador I) OX=126793 GN=PVX_003905 PE=4 SV=1			PEAKS DB
YLNDLCRN	15.23	1009.47	8	-2.9	505.738	2	42.06		8	710391	F8:16136	No	FL1029_IPP114_PB_CB_vivax_4_odd.raw	tr|A5JZ31|A5JZ31_PLAVS PI3K/PI4K domain-containing protein OS=Plasmodium vivax (strain Salvador I) OX=126793 GN=PVX_122030 PE=3 SV=1			PEAKS DB		12	47
C(+47.98)PTQRYNFRS	23.62	1318.57	10	4.5	660.296	2	32.15	138000	8	706931	F8:12296	No	FL1029_IPP114_PB_CB_vivax_4_odd.raw	tr|A5JZN9|A5JZN9_PLAVS 60S ribosomal protein L13 putative OS=Plasmodium vivax (strain Salvador I) OX=126793 GN=PVX_123070 PE=3 SV=1	Cysteine oxidation to cysteic acid	C1:Cysteine oxidation to cysteic acid:1000.00	PEAKS PTM
NFSKNIKKKK	25.62	1233.76	10	-2.3	412.258	3	20.79	365000	8	702855	F8:7905	No	FL1029_IPP114_PB_CB_vivax_4_odd.raw	tr|A5JZN9|A5JZN9_PLAVS 60S ribosomal protein L13 putative OS=Plasmodium vivax (strain Salvador I) OX=126793 GN=PVX_123070 PE=3 SV=1			PEAKS DB
TPIEKLHPI	23.29	1046.61	9	3	524.315	2	33.68	113000	8	707430	F8:12899	No	FL1029_IPP114_PB_CB_vivax_4_odd.raw	tr|A5JZN9|A5JZN9_PLAVS 60S ribosomal protein L13 putative OS=Plasmodium vivax (strain Salvador I) OX=126793 GN=PVX_123070 PE=3 SV=1			PEAKS DB
TTKVKRVQT	18.93	1059.64	9	0.1	354.221	3	21.46	151000	8	703071	F8:8177	No	FL1029_IPP114_PB_CB_vivax_4_odd.raw	tr|A5JZP0|A5JZP0_PLAVS 40S ribosomal protein S16 putative OS=Plasmodium vivax (strain Salvador I) OX=126793 GN=PVX_123075 PE=3 SV=1			PEAKS DB
RLTGGKKKIH	19.43	1136.71	10	0.7	379.912	3	21.16	136000	8	702970	F8:8033	No	FL1029_IPP114_PB_CB_vivax_4_odd.raw	tr|A5K1E3|A5K1E3_PLAVS 40S ribosomal protein S8 OS=Plasmodium vivax (strain Salvador I) OX=126793 GN=PVX_086020 PE=3 SV=1			PEAKS DB
RLTGGKKKIHKKK	21.95	1521	13	4.4	381.259	4	25.46	1920000	8	704450	F8:9552	No	FL1029_IPP114_PB_CB_vivax_4_odd.raw	tr|A5K1E3|A5K1E3_PLAVS 40S ribosomal protein S8 OS=Plasmodium vivax (strain Salvador I) OX=126793 GN=PVX_086020 PE=3 SV=1			PEAKS DB
SAGIKKPHRYRPGTV	15.03	1665.94	15	-0.6	556.321	3	27.6	196000	8	705265	F8:10484	No	FL1029_IPP114_PB_CB_vivax_4_odd.raw	tr|A5K1U7|A5K1U7_PLAVS Histone H3 OS=Plasmodium vivax (strain Salvador I) OX=126793 GN=PVX_113665 PE=3 SV=1			PEAKS DB
KAPRKQLASKAARK	17.52	1551.97	14	0.3	389	4	21.26	228000	8	703021	F8:8048	No	FL1029_IPP114_PB_CB_vivax_4_odd.raw	tr|A5K1U7|A5K1U7_PLAVS Histone H3 OS=Plasmodium vivax (strain Salvador I) OX=126793 GN=PVX_113665 PE=3 SV=1:tr|A5K215|A5K215_PLAVS Histone H3 OS=Plasmodium vivax (strain Salvador I) OX=126793 GN=PVX_114020 PE=3 SV=1			PEAKS DB
GRIGRYLKKGKYA	33.32	1508.89	13	1.3	378.231	4	32.45	974000	8	707034	F8:12404	No	FL1029_IPP114_PB_CB_vivax_4_odd.raw	tr|A5K214|A5K214_PLAVS Histone H2A OS=Plasmodium vivax (strain Salvador I) OX=126793 GN=PVX_114015 PE=3 SV=1			PEAKS DB
GRIGRYLKKGKYAK	33.56	1636.99	14	-1.1	410.254	4	30.79	2340000	8	706439	F8:11794	No	FL1029_IPP114_PB_CB_vivax_4_odd.raw	tr|A5K214|A5K214_PLAVS Histone H2A OS=Plasmodium vivax (strain Salvador I) OX=126793 GN=PVX_114015 PE=3 SV=1			PEAKS DB
TFLFNKKKKK	19.96	1280.8	10	-0.4	427.939	3	26.56	228000	8	704861	F8:10118	No	FL1029_IPP114_PB_CB_vivax_4_odd.raw	tr|A5K2B4|A5K2B4_PLAVS Ethanolaminephosphotransferase putative OS=Plasmodium vivax (strain Salvador I) OX=126793 GN=PVX_114515 PE=3 SV=1			PEAKS DB
SGKSTTTGHIIYK	25.75	1391.74	13	-1.2	696.877	2	25.46	112000	8	704455	F8:9702	No	FL1029_IPP114_PB_CB_vivax_4_odd.raw	tr|A5K2H7|A5K2H7_PLAVS Elongation factor 1-alpha OS=Plasmodium vivax (strain Salvador I) OX=126793 GN=PVX_114830 PE=3 SV=1			PEAKS DB
LRPKKKLK	18.61	1009.71	8	-0.4	337.578	3	20.69	792000	8	702807	F8:7855	No	FL1029_IPP114_PB_CB_vivax_4_odd.raw	tr|A5K2R4|A5K2R4_PLAVS Ubiquitin/ribosomal putative OS=Plasmodium vivax (strain Salvador I) OX=126793 GN=PVX_115255 PE=4 SV=1			PEAKS DB
NQLRPKKKLK	23.95	1251.81	10	0.5	418.279	3	20.82	344000	8	702864	F8:8273	No	FL1029_IPP114_PB_CB_vivax_4_odd.raw	tr|A5K2R4|A5K2R4_PLAVS Ubiquitin/ribosomal putative OS=Plasmodium vivax (strain Salvador I) OX=126793 GN=PVX_115255 PE=4 SV=1			PEAKS DB
KPNRHINL	20.78	990.572	8	3.8	496.295	2	44.81		8	711360	F8:17193	No	FL1029_IPP114_PB_CB_vivax_4_odd.raw	tr|A5K2R8|A5K2R8_PLAVS Uncharacterized protein OS=Plasmodium vivax (strain Salvador I) OX=126793 GN=PVX_115275 PE=4 SV=1			PEAKS DB
PLPDRNDVPL	17.37	1134.6	10	0.2	568.309	2	39.59	690000	8	709511	F8:15165	No	FL1029_IPP114_PB_CB_vivax_4_odd.raw	tr|A5K391|A5K391_PLAVS Enkurin domain-containing protein OS=Plasmodium vivax (strain Salvador I) OX=126793 GN=PVX_117135 PE=4 SV=1			PEAKS DB
TKRNLKKSIK	19.83	1214.78	10	-0.2	405.935	3	20.65	144000	8	702793	F8:8084	No	FL1029_IPP114_PB_CB_vivax_4_odd.raw	tr|A5K4B5|A5K4B5_PLAVS 60S ribosomal protein L36 OS=Plasmodium vivax (strain Salvador I) OX=126793 GN=PVX_091145 PE=3 SV=1			PEAKS DB
IGRFFSFLVR	23.16	1240.71	10	-2.9	621.36	2	43.48		8	710888	F8:16678	No	FL1029_IPP114_PB_CB_vivax_4_odd.raw	tr|A5K4L2|A5K4L2_PLAVS Uncharacterized protein OS=Plasmodium vivax (strain Salvador I) OX=126793 GN=PVX_091630 PE=4 SV=1			PEAKS DB
SYLFKKIKKKVF	30.49	1527.95	12	-0.5	510.325	3	41.44	390000	8	710157	F8:15731	No	FL1029_IPP114_PB_CB_vivax_4_odd.raw	tr|A5K4L3|A5K4L3_PLAVS Uncharacterized protein OS=Plasmodium vivax (strain Salvador I) OX=126793 GN=PVX_091635 PE=4 SV=1			PEAKS DB
KKYKNKKFKPY	25.41	1470.87	11	-0.3	491.298	3	28.55	882000	8	705584	F8:10412	No	FL1029_IPP114_PB_CB_vivax_4_odd.raw	tr|A5K4R0|A5K4R0_PLAVS 60S ribosomal protein L35 putative OS=Plasmodium vivax (strain Salvador I) OX=126793 GN=PVX_091865 PE=3 SV=1			PEAKS DB
IDEHAHLV	25.81	932.472	8	1	467.243	2	30.06	605000	8	706176	F8:11482	No	FL1029_IPP114_PB_CB_vivax_4_odd.raw	tr|A5K583|A5K583_PLAVS 60S ribosomal protein L28 putative OS=Plasmodium vivax (strain Salvador I) OX=126793 GN=PVX_092730 PE=4 SV=1			PEAKS DB
HGASRYKKSRA	26.21	1259.68	11	-1.5	420.902	3	19.85	1350000	8	702463	F8:7532	No	FL1029_IPP114_PB_CB_vivax_4_odd.raw	tr|A5K5A1|A5K5A1_PLAVS 60S ribosomal protein L41 putative OS=Plasmodium vivax (strain Salvador I) OX=126793 GN=PVX_092820 PE=4 SV=1			PEAKS DB
HGKPKHQGV	38.16	986.541	9	0.3	494.278	2	19.81	623000	8	702454	F8:7542	No	FL1029_IPP114_PB_CB_vivax_4_odd.raw	tr|A5K5X8|A5K5X8_PLAVS Ribosomal protein L15 OS=Plasmodium vivax (strain Salvador I) OX=126793 GN=PVX_089750 PE=3 SV=1			PEAKS DB
HLSAKSRPS	23.32	981.535	9	-2.1	328.185	3	21.43	94900	8	703061	F8:8147	No	FL1029_IPP114_PB_CB_vivax_4_odd.raw	tr|A5K5X8|A5K5X8_PLAVS Ribosomal protein L15 OS=Plasmodium vivax (strain Salvador I) OX=126793 GN=PVX_089750 PE=3 SV=1			PEAKS DB
KKKLVKRST	16.21	1086.72	9	0.4	363.249	3	36.53		8	708420	F8:13992	No	FL1029_IPP114_PB_CB_vivax_4_odd.raw	tr|A5K7A2|A5K7A2_PLAVS Uncharacterized protein OS=Plasmodium vivax (strain Salvador I) OX=126793 GN=PVX_094600 PE=4 SV=1			PEAKS DB
KYYRVKGKKKILIPV	15.51	1832.18	15	-1	459.051	4	40.8	1500000	8	709931	F8:15614	No	FL1029_IPP114_PB_CB_vivax_4_odd.raw	tr|A5K826|A5K826_PLAVS 60S ribosomal protein L6 putative OS=Plasmodium vivax (strain Salvador I) OX=126793 GN=PVX_082840 PE=4 SV=1			PEAKS DB
YRVKGKKK	16.54	1005.64	8	-0.1	336.222	3	19.68	412000	8	702399	F8:7481	No	FL1029_IPP114_PB_CB_vivax_4_odd.raw	tr|A5K826|A5K826_PLAVS 60S ribosomal protein L6 putative OS=Plasmodium vivax (strain Salvador I) OX=126793 GN=PVX_082840 PE=4 SV=1			PEAKS DB
YYRVKGKKKILIPV	16.83	1704.08	14	0.4	427.028	4	37.62	1520000	8	708810	F8:14370	No	FL1029_IPP114_PB_CB_vivax_4_odd.raw	tr|A5K826|A5K826_PLAVS 60S ribosomal protein L6 putative OS=Plasmodium vivax (strain Salvador I) OX=126793 GN=PVX_082840 PE=4 SV=1			PEAKS DB
GPKRATKIRK	20.23	1153.74	10	-0.3	385.587	3	20.18	417000	8	702587	F8:7676	No	FL1029_IPP114_PB_CB_vivax_4_odd.raw	tr|A5K858|A5K858_PLAVS 40S ribosomal protein S6 putative OS=Plasmodium vivax (strain Salvador I) OX=126793 GN=PVX_083000 PE=4 SV=1			PEAKS DB
TLESPDNAEIDM(+15.99)SS	42.72	1523.63	14	2.1	762.824	2	38.49	356000	8	709129	F8:14742	No	FL1029_IPP114_PB_CB_vivax_4_odd.raw	tr|A5K8G8|A5K8G8_PLAVS Uncharacterized protein OS=Plasmodium vivax (strain Salvador I) OX=126793 GN=PVX_083555 PE=4 SV=1	Oxidation (M)	M12:Oxidation (M):1000.00	PEAKS PTM
YRGVVTEEGA	16.3	1079.52	10	1	540.77	2	34.85	287000	8	707848	F8:13350	No	FL1029_IPP114_PB_CB_vivax_4_odd.raw	tr|A5KA47|A5KA47_PLAVS Uncharacterized protein OS=Plasmodium vivax (strain Salvador I) OX=126793 GN=PVX_087745 PE=4 SV=1			PEAKS DB
GKAGKGTGSFGKR	36.64	1249.69	13	-0.9	417.57	3	20.62	698000	8	702775	F8:7842	No	FL1029_IPP114_PB_CB_vivax_4_odd.raw	tr|A5KA70|A5KA70_PLAVS Ribosomal protein L37 OS=Plasmodium vivax (strain Salvador I) OX=126793 GN=PVX_087860 PE=3 SV=1			PEAKS DB
GKAGKGTGSFGKRN	29.57	1363.73	14	-0.2	455.584	3	20.49	884000	8	702736	F8:7791	No	FL1029_IPP114_PB_CB_vivax_4_odd.raw	tr|A5KA70|A5KA70_PLAVS Ribosomal protein L37 OS=Plasmodium vivax (strain Salvador I) OX=126793 GN=PVX_087860 PE=3 SV=1			PEAKS DB
DNKKAKKVGDKRKGR	26.46	1727.03	15	0.1	576.683	3	19.64	1020000	8	702391	F8:7473	No	FL1029_IPP114_PB_CB_vivax_4_odd.raw	tr|A5KAB1|A5KAB1_PLAVS 60S ribosomal protein L34-A putative OS=Plasmodium vivax (strain Salvador I) OX=126793 GN=PVX_088065 PE=4 SV=1			PEAKS DB
KSDSSKIA	15.28	834.445	8	0.2	418.23	2	21.43	112000	8	703064	F8:8167	No	FL1029_IPP114_PB_CB_vivax_4_odd.raw	tr|A5KAS9|A5KAS9_PLAVS Tryptophan-rich antigen (Pv-fam-a) OS=Plasmodium vivax (strain Salvador I) OX=126793 GN=PVX_097575 PE=4 SV=1			PEAKS DB
YGRIFKKKITKK	35.21	1508.96	12	-0.8	378.246	4	28.99	972000	8	705753	F8:10910	No	FL1029_IPP114_PB_CB_vivax_4_odd.raw	tr|A5KAZ9|A5KAZ9_PLAVS 60S ribosomal subunit protein L4/L1 putative OS=Plasmodium vivax (strain Salvador I) OX=126793 GN=PVX_097915 PE=4 SV=1			PEAKS DB
YGRIFKKKITKKN	22.38	1623	13	0.8	542.007	3	28.96	220000	8	705738	F8:10932	No	FL1029_IPP114_PB_CB_vivax_4_odd.raw	tr|A5KAZ9|A5KAZ9_PLAVS 60S ribosomal subunit protein L4/L1 putative OS=Plasmodium vivax (strain Salvador I) OX=126793 GN=PVX_097915 PE=4 SV=1			PEAKS DB
VNVPKTRKT	16.71	1041.63	9	-1.1	348.217	3	22.81	181000	8	703542	F8:8671	No	FL1029_IPP114_PB_CB_vivax_4_odd.raw	tr|A5KB61|A5KB61_PLAVS 60S Ribosomal protein L44 putative OS=Plasmodium vivax (strain Salvador I) OX=126793 GN=PVX_119345 PE=3 SV=1			PEAKS DB
SLLALFKEKKEKPRS	16.52	1773.05	15	-1.7	444.269	4	35.99	278000	8	708227	F8:13728	No	FL1029_IPP114_PB_CB_vivax_4_odd.raw	tr|A5KB86|A5KB86_PLAVS 40S ribosomal protein S23 putative OS=Plasmodium vivax (strain Salvador I) OX=126793 GN=PVX_119470 PE=3 SV=1			PEAKS DB
NTIAFVATEK	17.06	1092.58	10	1.4	547.299	2	30.25		8	706248	F8:11557	No	FL1029_IPP114_PB_CB_vivax_4_odd.raw	tr|A5KBK1|A5KBK1_PLAVS Uncharacterized protein OS=Plasmodium vivax (strain Salvador I) OX=126793 GN=PVX_003695 PE=4 SV=1			PEAKS DB
YFDLSRASFS	35.5	1191.56	10	2.2	596.787	2	46.5	458000	8	711965	F8:17837	No	FL1029_IPP114_PB_CB_vivax_4_odd.raw	tr|A5KBP3|A5KBP3_PLAVS Transmission-blocking target antigen Pfs230 putative OS=Plasmodium vivax (strain Salvador I) OX=126793 GN=PVX_003905 PE=4 SV=1			PEAKS DB
TGKYGTRYGSSL	17.41	1288.64	12	0.8	645.328	2	29.32	217000	8	705901	F8:11210	No	FL1029_IPP114_PB_CB_vivax_4_odd.raw	tr|A5KBQ3|A5KBQ3_PLAVS 60S ribosomal protein L37a putative OS=Plasmodium vivax (strain Salvador I) OX=126793 GN=PVX_003955 PE=3 SV=1			PEAKS DB
ARKKPATPKKQATPK	47.74	1649.01	15	-1.6	413.259	4	20.18	1260000	8	702589	F8:7674	No	FL1029_IPP114_PB_CB_vivax_4_odd.raw	tr|A5KC18|A5KC18_PLAVS Uncharacterized protein OS=Plasmodium vivax (strain Salvador I) OX=126793 GN=PVX_096030 PE=4 SV=1			PEAKS DB
KKAAARKKPATPK	20.72	1393.89	13	-1.9	349.479	4	19.81	319000	8	702452	F8:7537	No	FL1029_IPP114_PB_CB_vivax_4_odd.raw	tr|A5KC18|A5KC18_PLAVS Uncharacterized protein OS=Plasmodium vivax (strain Salvador I) OX=126793 GN=PVX_096030 PE=4 SV=1			PEAKS DB
RKKPATPKKQATPK	53.48	1577.97	14	-0.7	395.5	4	20.22	4930000	8	702611	F8:7672	No	FL1029_IPP114_PB_CB_vivax_4_odd.raw	tr|A5KC18|A5KC18_PLAVS Uncharacterized protein OS=Plasmodium vivax (strain Salvador I) OX=126793 GN=PVX_096030 PE=4 SV=1			PEAKS DB
RKKPATPKKQATPKK	15.9	1706.07	15	-0.7	569.696	3	20.12	323000	8	702562	F8:7643	No	FL1029_IPP114_PB_CB_vivax_4_odd.raw	tr|A5KC18|A5KC18_PLAVS Uncharacterized protein OS=Plasmodium vivax (strain Salvador I) OX=126793 GN=PVX_096030 PE=4 SV=1			PEAKS DB
KPLIKFGT	17.61	902.559	8	-4.1	452.285	2	41.47		8	710186	F8:15911	No	FL1029_IPP114_PB_CB_vivax_4_odd.raw	tr|A5KCC5|A5KCC5_PLAVS Uncharacterized protein OS=Plasmodium vivax (strain Salvador I) OX=126793 GN=PVX_001780 PE=4 SV=1			PEAKS DB
RNKKIYRIGLK	22.91	1387.88	11	-1.4	347.976	4	30.59	1400000	8	706379	F8:11703	No	FL1029_IPP114_PB_CB_vivax_4_odd.raw	tr|A5KE14|A5KE14_PLAVS Ribosomal protein L3 putative OS=Plasmodium vivax (strain Salvador I) OX=126793 GN=PVX_111330 PE=3 SV=1			PEAKS DB
GILHLLHKH	19.15	1066.64	9	0.7	534.328	2	48.22		9	735056	F9:18439	No	FL1029_IPP114_PB_CB_vivax_6_even.raw	tr|A5K9C7|A5K9C7_PLAVS Uncharacterized protein OS=Plasmodium vivax (strain Salvador I) OX=126793 GN=PVX_080090 PE=4 SV=1			PEAKS DB
YKILIKDKLK	25.48	1260.82	10	3.9	631.418	2	30.48		10	661688	F10:11620	No	FL1029_IPP114_PB_CB_vivax_6_odd.raw	tr|A5K0R6|A5K0R6_PLAVS Uncharacterized protein OS=Plasmodium vivax (strain Salvador I) OX=126793 GN=PVX_084865 PE=4 SV=1			PEAKS DB
R(+28.03)AAPEEHPVL	18.6	1145.62	10	0.3	573.817	2	31.01	106000	10	661865	F10:11810	No	FL1029_IPP114_PB_CB_vivax_6_odd.raw	tr|A5K8W3|A5K8W3_PLAVS Actin OS=Plasmodium vivax (strain Salvador I) OX=126793 GN=PVX_101200 PE=3 SV=1	Dimethylation(KR)	R1:Dimethylation(KR):1000.00	PEAKS PTM
SKDGKNEAAL	15.34	1031.52	10	0.2	516.77	2	25.47		10	659731	F10:9696	No	FL1029_IPP114_PB_CB_vivax_6_odd.raw	tr|A5KDT8|A5KDT8_PLAVS Uncharacterized protein OS=Plasmodium vivax (strain Salvador I) OX=126793 GN=PVX_110915 PE=4 SV=1			PEAKS DB
GRETPAKGGGHNVI	15.56	1391.73	14	-0.7	696.87	2	44.79	169000	11	644119	F11:17094	No	FL1029_IPP114_PB_CB_vivax_7_even.raw	tr|A5K035|A5K035_PLAVS Uncharacterized protein OS=Plasmodium vivax (strain Salvador I) OX=126793 GN=PVX_123805 PE=4 SV=1			PEAKS DB
YINKVYLFVYN	37.31	1434.75	11	0.1	718.385	2	48.53	881000	11	645450	F11:18520	No	FL1029_IPP114_PB_CB_vivax_7_even.raw	tr|A5K0C5|A5K0C5_PLAVS Dynein heavy chain putative OS=Plasmodium vivax (strain Salvador I) OX=126793 GN=PVX_084160 PE=4 SV=1			PEAKS DB
ASGGVLPNIHNV	23.33	1176.63	12	0.9	589.32	2	39.82	191000	11	642374	F11:15187	No	FL1029_IPP114_PB_CB_vivax_7_even.raw	tr|A5K214|A5K214_PLAVS Histone H2A OS=Plasmodium vivax (strain Salvador I) OX=126793 GN=PVX_114015 PE=3 SV=1			PEAKS DB
LLPKKSQLK	15.13	1053.69	9	-1	352.237	3	25.48	162000	11	637242	F11:9694	No	FL1029_IPP114_PB_CB_vivax_7_even.raw	tr|A5K214|A5K214_PLAVS Histone H2A OS=Plasmodium vivax (strain Salvador I) OX=126793 GN=PVX_114015 PE=3 SV=1			PEAKS DB
TSNSAKAGLQFPV	15.08	1318.69	13	0.6	660.352	2	41.3	71100	11	642893	F11:15783	No	FL1029_IPP114_PB_CB_vivax_7_even.raw	tr|A5K214|A5K214_PLAVS Histone H2A OS=Plasmodium vivax (strain Salvador I) OX=126793 GN=PVX_114015 PE=3 SV=1			PEAKS DB
NFDKYHPG	17.22	976.44	8	-3.3	489.226	2	27.4	271000	11	637920	F11:10408	No	FL1029_IPP114_PB_CB_vivax_7_even.raw	tr|A5K219|A5K219_PLAVS 60S ribosomal protein L27a putative OS=Plasmodium vivax (strain Salvador I) OX=126793 GN=PVX_114040 PE=3 SV=1			PEAKS DB
SGFLLHPSVTF	35.47	1203.63	11	0.8	602.822	2	49.4	448000	11	645738	F11:18868	No	FL1029_IPP114_PB_CB_vivax_7_even.raw	tr|A5K2A7|A5K2A7_PLAVS 4-methyl-5(B-hydroxyethyl)-thiazol monophosphate biosynthesis enzyme putative OS=Plasmodium vivax (strain Salvador I) OX=126793 GN=PVX_114480 PE=4 SV=1			PEAKS DB
EKFEKIKIIDFN	15.7	1522.84	12	-0.5	508.62	3	33.47	207000	11	640114	F11:12741	No	FL1029_IPP114_PB_CB_vivax_7_even.raw	tr|A5K3Y0|A5K3Y0_PLAVS Serine/threonine protein kinase putative OS=Plasmodium vivax (strain Salvador I) OX=126793 GN=PVX_118340 PE=4 SV=1			PEAKS DB
VKEVIKRKNVIGIIP	20.71	1705.1	15	0.3	853.557	2	34.04		11	640331	F11:12969	No	FL1029_IPP114_PB_CB_vivax_7_even.raw	tr|A5K4N4|A5K4N4_PLAVS Uncharacterized protein OS=Plasmodium vivax (strain Salvador I) OX=126793 GN=PVX_091735 PE=4 SV=1			PEAKS DB
NIPPKAFG	15.62	842.465	8	-3.9	422.238	2	27.94		11	638120	F11:10616	No	FL1029_IPP114_PB_CB_vivax_7_even.raw	tr|A5K584|A5K584_PLAVS 60S ribosomal protein L33-B putative OS=Plasmodium vivax (strain Salvador I) OX=126793 GN=PVX_092735 PE=3 SV=1			PEAKS DB
KNYGLFSDNYFTTAY	15.07	1802.82	15	4.7	601.948	3	44.41		11	643985	F11:16959	No	FL1029_IPP114_PB_CB_vivax_7_even.raw	tr|A5K5J0|A5K5J0_PLAVS HECT domain-containing protein OS=Plasmodium vivax (strain Salvador I) OX=126793 GN=PVX_089055 PE=4 SV=1			PEAKS DB
HLSAKSRPSIR	28.18	1250.72	11	-0.5	313.687	4	25	236000	11	637074	F11:9508	No	FL1029_IPP114_PB_CB_vivax_7_even.raw	tr|A5K5X8|A5K5X8_PLAVS Ribosomal protein L15 OS=Plasmodium vivax (strain Salvador I) OX=126793 GN=PVX_089750 PE=3 SV=1			PEAKS DB
NKKVYKLDKE	15.6	1263.72	10	-0.5	422.247	3	23.65	317000	11	636601	F11:8974	No	FL1029_IPP114_PB_CB_vivax_7_even.raw	tr|A5K662|A5K662_PLAVS 40S ribosomal protein S19s putative OS=Plasmodium vivax (strain Salvador I) OX=126793 GN=PVX_090160 PE=4 SV=1			PEAKS DB
KLMHGRDIE	19.63	1097.57	9	-0.6	549.79	2	32.75		11	639844	F11:12472	No	FL1029_IPP114_PB_CB_vivax_7_even.raw	tr|A5K715|A5K715_PLAVS High molecular weight rhoptry protein-2 putative OS=Plasmodium vivax (strain Salvador I) OX=126793 GN=PVX_099930 PE=4 SV=1			PEAKS DB
HQLVENADEV	15.99	1152.54	10	2	577.279	2	33.17	116000	11	640004	F11:12653	No	FL1029_IPP114_PB_CB_vivax_7_even.raw	tr|A5K7A8|A5K7A8_PLAVS Tubulin beta chain OS=Plasmodium vivax (strain Salvador I) OX=126793 GN=PVX_094635 PE=3 SV=1			PEAKS DB
DSEEKEEQGQKPEKV	22.84	1758.83	15	-0.2	587.283	3	23.86	348000	11	636680	F11:9057	No	FL1029_IPP114_PB_CB_vivax_7_even.raw	tr|A5K8G8|A5K8G8_PLAVS Uncharacterized protein OS=Plasmodium vivax (strain Salvador I) OX=126793 GN=PVX_083555 PE=4 SV=1			PEAKS DB
VETEPDDIDYGKSD	19.6	1581.67	14	1.1	791.842	2	34.81	132000	11	640602	F11:13272	No	FL1029_IPP114_PB_CB_vivax_7_even.raw	tr|A5K8G8|A5K8G8_PLAVS Uncharacterized protein OS=Plasmodium vivax (strain Salvador I) OX=126793 GN=PVX_083555 PE=4 SV=1			PEAKS DB
VETEPDDIDYGKSDD	26.56	1696.7	15	2.5	849.357	2	35.02	89300	11	640668	F11:13343	No	FL1029_IPP114_PB_CB_vivax_7_even.raw	tr|A5K8G8|A5K8G8_PLAVS Uncharacterized protein OS=Plasmodium vivax (strain Salvador I) OX=126793 GN=PVX_083555 PE=4 SV=1			PEAKS DB
DSRANAALDEPVL	19.98	1369.68	13	2.1	685.851	2	44.32	144000	11	643953	F11:16927	No	FL1029_IPP114_PB_CB_vivax_7_even.raw	tr|A5K904|A5K904_PLAVS Uncharacterized protein OS=Plasmodium vivax (strain Salvador I) OX=126793 GN=PVX_101400 PE=4 SV=1			PEAKS DB
KLLLCVVL	16.91	899.588	8	1.3	450.802	2	34.03		11	640327	F11:12965	No	FL1029_IPP114_PB_CB_vivax_7_even.raw	tr|A5K934|A5K934_PLAVS Uncharacterized protein OS=Plasmodium vivax (strain Salvador I) OX=126793 GN=PVX_101555 PE=4 SV=1			PEAKS DB
DEIERVAK	25.14	958.508	8	1.1	480.262	2	27.63		11	638012	F11:10496	No	FL1029_IPP114_PB_CB_vivax_7_even.raw	tr|A5KC61|A5KC61_PLAVS 40S ribosomal protein S5 putative OS=Plasmodium vivax (strain Salvador I) OX=126793 GN=PVX_096265 PE=3 SV=1			PEAKS DB
KANGDSANK	20.23	903.441	9	-4.8	452.726	2	27		12	682633	F12:10291	No	FL1029_IPP114_PB_CB_vivax_7_odd.raw	tr|A5JZ31|A5JZ31_PLAVS PI3K/PI4K domain-containing protein OS=Plasmodium vivax (strain Salvador I) OX=126793 GN=PVX_122030 PE=3 SV=1			PEAKS DB		10	71
SLALQKKKAA	21.54	1056.67	10	-1	353.229	3	23.22	136000	12	681386	F12:8852	No	FL1029_IPP114_PB_CB_vivax_7_odd.raw	tr|A5JZ82|A5JZ82_PLAVS 60S ribosomal protein L24 putative OS=Plasmodium vivax (strain Salvador I) OX=126793 GN=PVX_122285 PE=4 SV=1			PEAKS DB
STVITDQYVS(-.98)	21.85	1110.56	10	-3.6	556.283	2	29.89	1340000	12	683669	F12:11388	No	FL1029_IPP114_PB_CB_vivax_7_odd.raw	tr|A5JZN7|A5JZN7_PLAVS Alba domain-containing protein OS=Plasmodium vivax (strain Salvador I) OX=126793 GN=PVX_123060 PE=4 SV=1	Amidation	S10:Amidation:1000.00	PEAKS PTM
LGSLVGFVF	15.64	937.527	9	1.5	469.772	2	35.61	1300000	12	685680	F12:13631	No	FL1029_IPP114_PB_CB_vivax_7_odd.raw	tr|A5K090|A5K090_PLAVS Uncharacterized protein OS=Plasmodium vivax (strain Salvador I) OX=126793 GN=PVX_124080 PE=4 SV=1			PEAKS DB
Q(-17.03)FTKQRSNI	25.1	1103.57	9	1	552.794	2	32.44	1010000	12	684579	F12:12383	No	FL1029_IPP114_PB_CB_vivax_7_odd.raw	tr|A5K197|A5K197_PLAVS Sperm-specific protein Don juan putative OS=Plasmodium vivax (strain Salvador I) OX=126793 GN=PVX_085790 PE=4 SV=1	Pyro-glu from Q	Q1:Pyro-glu from Q:1000.00	PEAKS PTM
KSTTTGHIIYK	34.09	1247.69	11	0.7	416.903	3	25.37	220000	12	682097	F12:9663	No	FL1029_IPP114_PB_CB_vivax_7_odd.raw	tr|A5K2H7|A5K2H7_PLAVS Elongation factor 1-alpha OS=Plasmodium vivax (strain Salvador I) OX=126793 GN=PVX_114830 PE=3 SV=1			PEAKS DB
STTTGHIIYK	22.81	1119.59	10	1.3	560.804	2	27.5	128000	12	682789	F12:10498	No	FL1029_IPP114_PB_CB_vivax_7_odd.raw	tr|A5K2H7|A5K2H7_PLAVS Elongation factor 1-alpha OS=Plasmodium vivax (strain Salvador I) OX=126793 GN=PVX_114830 PE=3 SV=1			PEAKS DB
HSNMHCSPYSGC	15.08	1321.46	12	2.1	1322.47	1	13.08	48000	12	677782	F12:4765	No	FL1029_IPP114_PB_CB_vivax_7_odd.raw	tr|A5K2V5|A5K2V5_PLAVS Uncharacterized protein OS=Plasmodium vivax (strain Salvador I) OX=126793 GN=PVX_115460 PE=4 SV=1			PEAKS DB
KNPKCPKV(+21.98)	15.55	934.503	8	1.5	468.26	2	39.17		12	686937	F12:14984	No	FL1029_IPP114_PB_CB_vivax_7_odd.raw	tr|A5K303|A5K303_PLAVS 60S ribosomal protein L23a putative OS=Plasmodium vivax (strain Salvador I) OX=126793 GN=PVX_116700 PE=3 SV=1	Sodium adduct	V8:Sodium adduct:1000.00	PEAKS PTM
GDTELSGRFLI	22.14	1206.62	11	1.1	604.32	2	47.66		12	689960	F12:18233	No	FL1029_IPP114_PB_CB_vivax_7_odd.raw	tr|A5K3E2|A5K3E2_PLAVS 50S ribosomal protein S28e putative OS=Plasmodium vivax (strain Salvador I) OX=126793 GN=PVX_117390 PE=3 SV=1			PEAKS DB
GSAEDDLK	23.25	833.377	8	-0.3	417.695	2	25.99		12	682304	F12:9897	No	FL1029_IPP114_PB_CB_vivax_7_odd.raw	tr|A5K3U1|A5K3U1_PLAVS 40S ribosomal protein S2 putative OS=Plasmodium vivax (strain Salvador I) OX=126793 GN=PVX_118145 PE=3 SV=1			PEAKS DB
R(+28.03)GSAEDDLK	17.41	1017.51	9	0.9	509.762	2	24.36	489000	12	681782	F12:9271	No	FL1029_IPP114_PB_CB_vivax_7_odd.raw	tr|A5K3U1|A5K3U1_PLAVS 40S ribosomal protein S2 putative OS=Plasmodium vivax (strain Salvador I) OX=126793 GN=PVX_118145 PE=3 SV=1	Dimethylation(KR)	R1:Dimethylation(KR):67.76	PEAKS PTM
DIVYSLKRQG	18.05	1177.65	10	0.4	589.83	2	33.54	111000	12	684971	F12:12836	No	FL1029_IPP114_PB_CB_vivax_7_odd.raw	tr|A5K474|A5K474_PLAVS Histone H4 OS=Plasmodium vivax (strain Salvador I) OX=126793 GN=PVX_090930 PE=3 SV=1			PEAKS DB
KFFRRRGEAT	17.93	1266.69	10	5	423.241	3	39.7		12	687132	F12:15190	No	FL1029_IPP114_PB_CB_vivax_7_odd.raw	tr|A5K5I2|A5K5I2_PLAVS ATP-dependent RNA helicase OS=Plasmodium vivax (strain Salvador I) OX=126793 GN=PVX_089015 PE=3 SV=1			PEAKS DB
YRGDVVPKDVNAAVA	18.08	1572.83	15	-2.3	525.281	3	34.88	179000	12	685427	F12:13326	No	FL1029_IPP114_PB_CB_vivax_7_odd.raw	tr|A5K661|A5K661_PLAVS Tubulin alpha chain OS=Plasmodium vivax (strain Salvador I) OX=126793 GN=PVX_090155 PE=3 SV=1:tr|A5K6A8|A5K6A8_PLAVS Tubulin alpha chain OS=Plasmodium vivax (strain Salvador I) OX=126793 GN=PVX_098630 PE=3 SV=1			PEAKS DB
TPIITNKPFGK	20.58	1214.7	11	-0.5	608.358	2	33.34	107000	12	684905	F12:12753	No	FL1029_IPP114_PB_CB_vivax_7_odd.raw	tr|A5K676|A5K676_PLAVS Early transcribed membrane protein (ETRAMP) OS=Plasmodium vivax (strain Salvador I) OX=126793 GN=PVX_090230 PE=4 SV=1			PEAKS DB
IGYGSNKKTKF	22.68	1241.68	11	-0.3	414.899	3	26.48	343000	12	682453	F12:10077	No	FL1029_IPP114_PB_CB_vivax_7_odd.raw	tr|A5K6B0|A5K6B0_PLAVS 60S ribosomal protein L32 putative OS=Plasmodium vivax (strain Salvador I) OX=126793 GN=PVX_098640 PE=4 SV=1			PEAKS DB
SFFNSKKIKKGSK	26.84	1497.87	13	0.4	500.296	3	25.61	624000	12	682162	F12:9717	No	FL1029_IPP114_PB_CB_vivax_7_odd.raw	tr|A5K7Q0|A5K7Q0_PLAVS 40S ribosomal protein S11 putative OS=Plasmodium vivax (strain Salvador I) OX=126793 GN=PVX_095350 PE=3 SV=1			PEAKS DB
TLESPDNAEIDMSS	24.95	1507.63	14	2.3	754.826	2	44.32	134000	12	688762	F12:16969	No	FL1029_IPP114_PB_CB_vivax_7_odd.raw	tr|A5K8G8|A5K8G8_PLAVS Uncharacterized protein OS=Plasmodium vivax (strain Salvador I) OX=126793 GN=PVX_083555 PE=4 SV=1			PEAKS DB
VETEPDDIDYGK	30.68	1379.61	12	0.5	690.812	2	34.08	468000	12	685145	F12:13018	No	FL1029_IPP114_PB_CB_vivax_7_odd.raw	tr|A5K8G8|A5K8G8_PLAVS Uncharacterized protein OS=Plasmodium vivax (strain Salvador I) OX=126793 GN=PVX_083555 PE=4 SV=1			PEAKS DB
LILRAAIKTK	17.8	1125.76	10	-2.8	1126.76	1	54.51	889000	12	692383	F12:20822	No	FL1029_IPP114_PB_CB_vivax_7_odd.raw	tr|A5K8J8|A5K8J8_PLAVS PPR_long domain-containing protein OS=Plasmodium vivax (strain Salvador I) OX=126793 GN=PVX_100625 PE=4 SV=1			PEAKS DB
KSAYAISK	15.02	866.486	8	0.2	434.25	2	24.33		12	681775	F12:9259	No	FL1029_IPP114_PB_CB_vivax_7_odd.raw	tr|A5K9G3|A5K9G3_PLAVS Endo/exonuclease/phosphatase domain-containing protein OS=Plasmodium vivax (strain Salvador I) OX=126793 GN=PVX_080270 PE=4 SV=1			PEAKS DB
DKIRYEAI	18.17	1006.54	8	1.6	504.28	2	33.02	826000	12	684785	F12:12628	No	FL1029_IPP114_PB_CB_vivax_7_odd.raw	tr|A5KA88|A5KA88_PLAVS Heat shock protein 86 putative OS=Plasmodium vivax (strain Salvador I) OX=126793 GN=PVX_087950 PE=3 SV=1			PEAKS DB
KAFIPCLK	16.19	918.536	8	3.7	460.277	2	25.77		12	682236	F12:9812	No	FL1029_IPP114_PB_CB_vivax_7_odd.raw	tr|A5KB04|A5KB04_PLAVS Cell differentiation protein rcd1 putative OS=Plasmodium vivax (strain Salvador I) OX=126793 GN=PVX_097940 PE=4 SV=1			PEAKS DB
KEPLLGGLNQKQPT	17.23	1521.85	14	-0.2	508.291	3	33.68	114000	12	685015	F12:12868	No	FL1029_IPP114_PB_CB_vivax_7_odd.raw	tr|A5KBH5|A5KBH5_PLAVS Early transcribed membrane protein (ETRAMP) OS=Plasmodium vivax (strain Salvador I) OX=126793 GN=PVX_003565 PE=4 SV=1			PEAKS DB
VPNGGMYL	16.36	849.405	8	4.8	425.712	2	19.43	585000	12	679937	F12:7397	No	FL1029_IPP114_PB_CB_vivax_7_odd.raw	tr|A5KCD3|A5KCD3_PLAVS GYF domain-containing protein OS=Plasmodium vivax (strain Salvador I) OX=126793 GN=PVX_001810 PE=4 SV=1			PEAKS DB
AGKEKDDKKKGKD	37.5	1445.78	13	0.1	482.935	3	19.31	699000	13	967490	F13:7332	No	FL1029_IPP114_PB_CB_vivax_8_even.raw	tr|A5JZ82|A5JZ82_PLAVS 60S ribosomal protein L24 putative OS=Plasmodium vivax (strain Salvador I) OX=126793 GN=PVX_122285 PE=4 SV=1			PEAKS DB		13	52
DNNEHVVQEKTVSF	59.06	1644.77	14	2.8	823.397	2	35.22	4280000	13	973153	F13:13441	No	FL1029_IPP114_PB_CB_vivax_8_even.raw	tr|A5JZN7|A5JZN7_PLAVS Alba domain-containing protein OS=Plasmodium vivax (strain Salvador I) OX=126793 GN=PVX_123060 PE=4 SV=1			PEAKS DB
KNIKSKNGIGGIPAD	31.77	1510.85	15	2.2	504.624	3	27.71	1350000	13	970475	F13:10562	No	FL1029_IPP114_PB_CB_vivax_8_even.raw	tr|A5JZN9|A5JZN9_PLAVS 60S ribosomal protein L13 putative OS=Plasmodium vivax (strain Salvador I) OX=126793 GN=PVX_123070 PE=3 SV=1			PEAKS DB
YESIEVSKI	31.98	1066.55	9	1.8	534.285	2	38.66	556000	13	974376	F13:14781	No	FL1029_IPP114_PB_CB_vivax_8_even.raw	tr|A5JZN9|A5JZN9_PLAVS 60S ribosomal protein L13 putative OS=Plasmodium vivax (strain Salvador I) OX=126793 GN=PVX_123070 PE=3 SV=1			PEAKS DB
YESIEVSKID	40.53	1181.58	10	1.9	591.799	2	38.02	543000	13	974151	F13:14549	No	FL1029_IPP114_PB_CB_vivax_8_even.raw	tr|A5JZN9|A5JZN9_PLAVS 60S ribosomal protein L13 putative OS=Plasmodium vivax (strain Salvador I) OX=126793 GN=PVX_123070 PE=3 SV=1			PEAKS DB
KKNSLHLEK	15.31	1095.64	9	-0.8	548.827	2	29.75		13	971202	F13:11341	No	FL1029_IPP114_PB_CB_vivax_8_even.raw	tr|A5K034|A5K034_PLAVS Phospholipid-transporting ATPase putative OS=Plasmodium vivax (strain Salvador I) OX=126793 GN=PVX_123800 PE=4 SV=1			PEAKS DB
EIKRLEEV	18.34	1014.57	8	0.7	508.293	2	38.79	213000	13	974422	F13:14851	No	FL1029_IPP114_PB_CB_vivax_8_even.raw	tr|A5K0G3|A5K0G3_PLAVS Uncharacterized protein OS=Plasmodium vivax (strain Salvador I) OX=126793 GN=PVX_084350 PE=4 SV=1			PEAKS DB
AKDKKQLKKPS	31.5	1269.78	11	-1.2	424.266	3	19.88	1250000	13	967684	F13:7542	No	FL1029_IPP114_PB_CB_vivax_8_even.raw	tr|A5K0Z6|A5K0Z6_PLAVS Ribosomal protein L7a putative OS=Plasmodium vivax (strain Salvador I) OX=126793 GN=PVX_085270 PE=4 SV=1			PEAKS DB
KDIKKERKKGIRS	19.95	1584.98	13	1.9	397.253	4	20.34		13	967840	F13:7702	No	FL1029_IPP114_PB_CB_vivax_8_even.raw	tr|A5K0Z6|A5K0Z6_PLAVS Ribosomal protein L7a putative OS=Plasmodium vivax (strain Salvador I) OX=126793 GN=PVX_085270 PE=4 SV=1			PEAKS DB
GASCGESADQSGD	22.5	1182.41	13	-0.8	592.212	2	32.75		13	972270	F13:12499	No	FL1029_IPP114_PB_CB_vivax_8_even.raw	tr|A5K103|A5K103_PLAVS Uncharacterized protein OS=Plasmodium vivax (strain Salvador I) OX=126793 GN=PVX_085310 PE=4 SV=1			PEAKS DB
GKNKEKLNHAVF	15.78	1383.76	12	0.4	462.262	3	26.23	679000	13	969949	F13:10002	No	FL1029_IPP114_PB_CB_vivax_8_even.raw	tr|A5K124|A5K124_PLAVS 40S ribosomal protein S25 putative OS=Plasmodium vivax (strain Salvador I) OX=126793 GN=PVX_085420 PE=4 SV=1			PEAKS DB
KGKNKEKL	18.99	943.581	8	-2.3	315.534	3	20.19	1600000	13	967786	F13:7664	No	FL1029_IPP114_PB_CB_vivax_8_even.raw	tr|A5K124|A5K124_PLAVS 40S ribosomal protein S25 putative OS=Plasmodium vivax (strain Salvador I) OX=126793 GN=PVX_085420 PE=4 SV=1			PEAKS DB
KGKNKEKLNHAV	22.6	1364.79	12	-0.7	455.937	3	21.43	1580000	13	968231	F13:8132	No	FL1029_IPP114_PB_CB_vivax_8_even.raw	tr|A5K124|A5K124_PLAVS 40S ribosomal protein S25 putative OS=Plasmodium vivax (strain Salvador I) OX=126793 GN=PVX_085420 PE=4 SV=1			PEAKS DB
KGKNKEKLNHAVF	24.05	1511.86	13	1.7	504.961	3	25.26	1250000	13	969603	F13:9628	No	FL1029_IPP114_PB_CB_vivax_8_even.raw	tr|A5K124|A5K124_PLAVS 40S ribosomal protein S25 putative OS=Plasmodium vivax (strain Salvador I) OX=126793 GN=PVX_085420 PE=4 SV=1			PEAKS DB
NKEKLNHAVF	19.46	1198.65	10	-2.1	400.555	3	27.81	392000	13	970511	F13:10628	No	FL1029_IPP114_PB_CB_vivax_8_even.raw	tr|A5K124|A5K124_PLAVS 40S ribosomal protein S25 putative OS=Plasmodium vivax (strain Salvador I) OX=126793 GN=PVX_085420 PE=4 SV=1			PEAKS DB
KKADK(+43.99)KDEKK	16.29	1260.7	10	4.1	631.362	2	25.14		13	969557	F13:9565	No	FL1029_IPP114_PB_CB_vivax_8_even.raw	tr|A5K197|A5K197_PLAVS Sperm-specific protein Don juan putative OS=Plasmodium vivax (strain Salvador I) OX=126793 GN=PVX_085790 PE=4 SV=1	Carboxylation (DKW)	K5:Carboxylation (DKW):0.00	PEAKS PTM
KKDDK(+43.01)TKK	15.28	1032.59	8	0.6	517.304	2	25.08		13	969532	F13:9543	No	FL1029_IPP114_PB_CB_vivax_8_even.raw	tr|A5K197|A5K197_PLAVS Sperm-specific protein Don juan putative OS=Plasmodium vivax (strain Salvador I) OX=126793 GN=PVX_085790 PE=4 SV=1	Carbamylation	K5:Carbamylation:12.81	PEAKS PTM
KKVKKNILK	22.07	1097.76	9	-0.3	366.929	3	21.5	557000	13	968262	F13:8170	No	FL1029_IPP114_PB_CB_vivax_8_even.raw	tr|A5K197|A5K197_PLAVS Sperm-specific protein Don juan putative OS=Plasmodium vivax (strain Salvador I) OX=126793 GN=PVX_085790 PE=4 SV=1			PEAKS DB
KKVKKNILKTQKTKK	28.29	1812.2	15	0	454.058	4	20.76	945000	13	968010	F13:7876	No	FL1029_IPP114_PB_CB_vivax_8_even.raw	tr|A5K197|A5K197_PLAVS Sperm-specific protein Don juan putative OS=Plasmodium vivax (strain Salvador I) OX=126793 GN=PVX_085790 PE=4 SV=1			PEAKS DB
FYKRKM(+15.99)DKKKRN	28.69	1656.92	12	-1.6	415.238	4	20.05	785000	13	967741	F13:7614	No	FL1029_IPP114_PB_CB_vivax_8_even.raw	tr|A5K1E3|A5K1E3_PLAVS 40S ribosomal protein S8 OS=Plasmodium vivax (strain Salvador I) OX=126793 GN=PVX_086020 PE=3 SV=1	Oxidation (M)	M6:Oxidation (M):1000.00	PEAKS PTM
GISRDGRHKL	33.29	1137.64	10	0.4	380.22	3	23.33	1200000	13	968932	F13:8874	No	FL1029_IPP114_PB_CB_vivax_8_even.raw	tr|A5K1E3|A5K1E3_PLAVS 40S ribosomal protein S8 OS=Plasmodium vivax (strain Salvador I) OX=126793 GN=PVX_086020 PE=3 SV=1			PEAKS DB
GISRDGRHKLRLTG	30.39	1564.89	14	0	392.23	4	27.54	1190000	13	970413	F13:10470	No	FL1029_IPP114_PB_CB_vivax_8_even.raw	tr|A5K1E3|A5K1E3_PLAVS 40S ribosomal protein S8 OS=Plasmodium vivax (strain Salvador I) OX=126793 GN=PVX_086020 PE=3 SV=1			PEAKS DB
GISRDGRHKLRLTGG	24.53	1621.91	15	-0.7	406.485	4	27.61	548000	13	970439	F13:10520	No	FL1029_IPP114_PB_CB_vivax_8_even.raw	tr|A5K1E3|A5K1E3_PLAVS 40S ribosomal protein S8 OS=Plasmodium vivax (strain Salvador I) OX=126793 GN=PVX_086020 PE=3 SV=1			PEAKS DB
RLTGGKKKIHK	30.54	1264.81	11	0.1	422.61	3	20.39	2580000	13	967864	F13:7740	No	FL1029_IPP114_PB_CB_vivax_8_even.raw	tr|A5K1E3|A5K1E3_PLAVS 40S ribosomal protein S8 OS=Plasmodium vivax (strain Salvador I) OX=126793 GN=PVX_086020 PE=3 SV=1			PEAKS DB
RPPSNTKLGSKQV	22.36	1410.79	13	1.5	471.273	3	24.7	547000	13	969399	F13:9413	No	FL1029_IPP114_PB_CB_vivax_8_even.raw	tr|A5K1E3|A5K1E3_PLAVS 40S ribosomal protein S8 OS=Plasmodium vivax (strain Salvador I) OX=126793 GN=PVX_086020 PE=3 SV=1			PEAKS DB
APISAGIKKPHR	40.59	1273.76	12	-0.5	425.594	3	25	492000	13	969503	F13:9515	No	FL1029_IPP114_PB_CB_vivax_8_even.raw	tr|A5K1U7|A5K1U7_PLAVS Histone H3 OS=Plasmodium vivax (strain Salvador I) OX=126793 GN=PVX_113665 PE=3 SV=1			PEAKS DB
ATRFKKNRKKRG	36.35	1488.91	12	-2.4	373.234	4	20.05	1240000	13	967740	F13:7604	No	FL1029_IPP114_PB_CB_vivax_8_even.raw	tr|A5K219|A5K219_PLAVS 60S ribosomal protein L27a putative OS=Plasmodium vivax (strain Salvador I) OX=126793 GN=PVX_114040 PE=3 SV=1			PEAKS DB
WGKYQKMK	18.5	1067.56	8	1.6	534.787	2	20.42		13	967872	F13:7735	No	FL1029_IPP114_PB_CB_vivax_8_even.raw	tr|A5K285|A5K285_PLAVS DNA polymerase 1 putative OS=Plasmodium vivax (strain Salvador I) OX=126793 GN=PVX_114370 PE=4 SV=1			PEAKS DB
KDKAGCQNK	16.26	990.492	9	-1	496.253	2	23.44		13	968968	F13:8910	No	FL1029_IPP114_PB_CB_vivax_8_even.raw	tr|A5K2L2|A5K2L2_PLAVS Guanylyl cyclase putative OS=Plasmodium vivax (strain Salvador I) OX=126793 GN=PVX_114990 PE=4 SV=1			PEAKS DB
ASGNDKLGKKK	16.92	1144.66	11	-0.3	573.335	2	40.53		13	975052	F13:15517	No	FL1029_IPP114_PB_CB_vivax_8_even.raw	tr|A5K303|A5K303_PLAVS 60S ribosomal protein L23a putative OS=Plasmodium vivax (strain Salvador I) OX=126793 GN=PVX_116700 PE=3 SV=1			PEAKS DB
GILKYPLTSEKAM(+15.99)KK	37.05	1721.97	15	0.8	574.999	3	29.85	587000	13	971246	F13:11396	No	FL1029_IPP114_PB_CB_vivax_8_even.raw	tr|A5K303|A5K303_PLAVS 60S ribosomal protein L23a putative OS=Plasmodium vivax (strain Salvador I) OX=126793 GN=PVX_116700 PE=3 SV=1	Oxidation (M)	M13:Oxidation (M):1000.00	PEAKS PTM
ILKYPLTSEK	32.59	1190.69	10	0	397.904	3	32.79	356000	13	972289	F13:12523	No	FL1029_IPP114_PB_CB_vivax_8_even.raw	tr|A5K303|A5K303_PLAVS 60S ribosomal protein L23a putative OS=Plasmodium vivax (strain Salvador I) OX=126793 GN=PVX_116700 PE=3 SV=1			PEAKS DB
KKKGADKEKK	22.56	1158.71	10	0.1	580.361	2	19.31	422000	13	967491	F13:7334	No	FL1029_IPP114_PB_CB_vivax_8_even.raw	tr|A5K303|A5K303_PLAVS 60S ribosomal protein L23a putative OS=Plasmodium vivax (strain Salvador I) OX=126793 GN=PVX_116700 PE=3 SV=1			PEAKS DB
EEETFEEKKSEEKKD	35.85	1883.86	15	0.8	628.962	3	23.14	1800000	13	968845	F13:8794	No	FL1029_IPP114_PB_CB_vivax_8_even.raw	tr|A5K347|A5K347_PLAVS Exported protein 2 putative OS=Plasmodium vivax (strain Salvador I) OX=126793 GN=PVX_116915 PE=4 SV=1			PEAKS DB
LSAAPAGV	20.02	684.381	8	4.2	343.199	2	31.89	1460000	13	971972	F13:12175	No	FL1029_IPP114_PB_CB_vivax_8_even.raw	tr|A5K376|A5K376_PLAVS Uncharacterized protein OS=Plasmodium vivax (strain Salvador I) OX=126793 GN=PVX_117060 PE=4 SV=1			PEAKS DB
GDTELSGRFL	29.13	1093.54	10	0.5	547.778	2	42.05		13	975580	F13:16097	No	FL1029_IPP114_PB_CB_vivax_8_even.raw	tr|A5K3E2|A5K3E2_PLAVS 50S ribosomal protein S28e putative OS=Plasmodium vivax (strain Salvador I) OX=126793 GN=PVX_117390 PE=3 SV=1			PEAKS DB
LETEREARRLR	22.35	1427.8	11	0.9	357.957	4	25.24		13	969595	F13:9606	No	FL1029_IPP114_PB_CB_vivax_8_even.raw	tr|A5K3E2|A5K3E2_PLAVS 50S ribosomal protein S28e putative OS=Plasmodium vivax (strain Salvador I) OX=126793 GN=PVX_117390 PE=3 SV=1			PEAKS DB
GKLLKPGKVVI	23.76	1150.78	11	-0.1	384.601	3	32.46	481000	13	972175	F13:12399	No	FL1029_IPP114_PB_CB_vivax_8_even.raw	tr|A5K3E8|A5K3E8_PLAVS 60S ribosomal protein L27 putative OS=Plasmodium vivax (strain Salvador I) OX=126793 GN=PVX_117420 PE=4 SV=1			PEAKS DB
KNGIKKPKKHKF	45.6	1451.91	12	2	726.963	2	21.7	491000	13	968326	F13:8235	No	FL1029_IPP114_PB_CB_vivax_8_even.raw	tr|A5K3F2|A5K3F2_PLAVS 60S ribosomal protein L29 OS=Plasmodium vivax (strain Salvador I) OX=126793 GN=PVX_117440 PE=3 SV=1			PEAKS DB
RKAHKNGIKKPK	42.08	1403.88	12	-1.3	351.978	4	19.95	2360000	13	967708	F13:7567	No	FL1029_IPP114_PB_CB_vivax_8_even.raw	tr|A5K3F2|A5K3F2_PLAVS 60S ribosomal protein L29 OS=Plasmodium vivax (strain Salvador I) OX=126793 GN=PVX_117440 PE=3 SV=1			PEAKS DB
VYLIKILMIK	17.16	1232.79	10	0.4	617.404	2	32.56		13	972214	F13:12436	No	FL1029_IPP114_PB_CB_vivax_8_even.raw	tr|A5K3Y1|A5K3Y1_PLAVS SEC7 domain-containing protein OS=Plasmodium vivax (strain Salvador I) OX=126793 GN=PVX_118345 PE=4 SV=1			PEAKS DB
PRNPNYRDQQYPD	17.41	1661.75	13	1.9	554.927	3	27.54		13	970414	F13:10496	No	FL1029_IPP114_PB_CB_vivax_8_even.raw	tr|A5K452|A5K452_PLAVS Pv-fam-d protein OS=Plasmodium vivax (strain Salvador I) OX=126793 GN=PVX_118695 PE=4 SV=1			PEAKS DB
DGRFNILIVVKD	15.33	1387.78	12	-1.4	694.898	2	19.38	123000	13	967513	F13:7360	No	FL1029_IPP114_PB_CB_vivax_8_even.raw	tr|A5K4I3|A5K4I3_PLAVS Ubiquitin C-terminal hydrolase family 1 putative OS=Plasmodium vivax (strain Salvador I) OX=126793 GN=PVX_091485 PE=4 SV=1			PEAKS DB
KGKKNATT	16.88	846.492	8	1.2	424.254	2	40.73		13	975125	F13:15595	No	FL1029_IPP114_PB_CB_vivax_8_even.raw	tr|A5K504|A5K504_PLAVS Uncharacterized protein OS=Plasmodium vivax (strain Salvador I) OX=126793 GN=PVX_092335 PE=4 SV=1			PEAKS DB
KYFLGLARE	15.97	1095.61	9	3.7	548.813	2	35.63		13	973300	F13:13625	No	FL1029_IPP114_PB_CB_vivax_8_even.raw	tr|A5K504|A5K504_PLAVS Uncharacterized protein OS=Plasmodium vivax (strain Salvador I) OX=126793 GN=PVX_092335 PE=4 SV=1			PEAKS DB
GDRVRILMYPSNI	19.65	1532.81	13	0.7	511.945	3	43.95	1010000	13	976247	F13:16837	No	FL1029_IPP114_PB_CB_vivax_8_even.raw	tr|A5K584|A5K584_PLAVS 60S ribosomal protein L33-B putative OS=Plasmodium vivax (strain Salvador I) OX=126793 GN=PVX_092735 PE=3 SV=1			PEAKS DB
SVINAKAKLQKTEE	22.77	1557.87	14	-0.8	520.298	3	27.58	1090000	13	970427	F13:10522	No	FL1029_IPP114_PB_CB_vivax_8_even.raw	tr|A5K6B0|A5K6B0_PLAVS 60S ribosomal protein L32 putative OS=Plasmodium vivax (strain Salvador I) OX=126793 GN=PVX_098640 PE=4 SV=1			PEAKS DB
QRSALVNNPL	16.1	1110.61	10	-3.6	556.312	2	50.09	252000	13	978430	F13:19192	No	FL1029_IPP114_PB_CB_vivax_8_even.raw	tr|A5K6C4|A5K6C4_PLAVS Uncharacterized protein OS=Plasmodium vivax (strain Salvador I) OX=126793 GN=PVX_098710 PE=4 SV=1			PEAKS DB
PKIEPPKKKFIPSVL	17.2	1720.07	15	-1.6	574.361	3	36.22	378000	13	973516	F13:13858	No	FL1029_IPP114_PB_CB_vivax_8_even.raw	tr|A5K6T4|A5K6T4_PLAVS 50S ribosomal protein L29 putative OS=Plasmodium vivax (strain Salvador I) OX=126793 GN=PVX_099510 PE=4 SV=1			PEAKS DB
M(+15.99)YKKVYVID	36.85	1173.61	9	2.1	587.814	2	31.55	4980000	13	971833	F13:12021	No	FL1029_IPP114_PB_CB_vivax_8_even.raw	tr|A5K762|A5K762_PLAVS 60S ribosomal protein L13a putative OS=Plasmodium vivax (strain Salvador I) OX=126793 GN=PVX_094400 PE=3 SV=1	Oxidation (M)	M1:Oxidation (M):1000.00	PEAKS PTM
NEKKELKTEAL	32.5	1301.72	11	-0.2	434.913	3	26.43	718000	13	970018	F13:10067	No	FL1029_IPP114_PB_CB_vivax_8_even.raw	tr|A5K762|A5K762_PLAVS 60S ribosomal protein L13a putative OS=Plasmodium vivax (strain Salvador I) OX=126793 GN=PVX_094400 PE=3 SV=1			PEAKS DB
KAKGAKNEMVK	16.1	1202.68	11	0.2	602.348	2	29.87		13	971251	F13:11388	No	FL1029_IPP114_PB_CB_vivax_8_even.raw	tr|A5K7A2|A5K7A2_PLAVS Uncharacterized protein OS=Plasmodium vivax (strain Salvador I) OX=126793 GN=PVX_094600 PE=4 SV=1			PEAKS DB
AKKADAKKADAKK	27.73	1371.82	13	-1.4	458.28	3	19.44	15900000	13	967540	F13:7384	No	FL1029_IPP114_PB_CB_vivax_8_even.raw	tr|A5K7E3|A5K7E3_PLAVS QF122 antigen putative OS=Plasmodium vivax (strain Salvador I) OX=126793 GN=PVX_094810 PE=4 SV=1			PEAKS DB
KNFKKENQ	18.73	1034.55	8	-3.7	518.281	2	37.22		13	973863	F13:14233	No	FL1029_IPP114_PB_CB_vivax_8_even.raw	tr|A5K7K0|A5K7K0_PLAVS Uncharacterized protein OS=Plasmodium vivax (strain Salvador I) OX=126793 GN=PVX_095095 PE=4 SV=1			PEAKS DB
GNGKKFNKKPF	34.36	1263.71	11	-0.1	422.243	3	24.56	637000	13	969352	F13:9345	No	FL1029_IPP114_PB_CB_vivax_8_even.raw	tr|A5K7V6|A5K7V6_PLAVS RRM domain-containing protein OS=Plasmodium vivax (strain Salvador I) OX=126793 GN=PVX_082480 PE=4 SV=1			PEAKS DB
KDSQKKGGKKKD	15.83	1345.77	12	0.9	449.597	3	19.28	123000	13	967443	F13:7306	No	FL1029_IPP114_PB_CB_vivax_8_even.raw	tr|A5K858|A5K858_PLAVS 40S ribosomal protein S6 putative OS=Plasmodium vivax (strain Salvador I) OX=126793 GN=PVX_083000 PE=4 SV=1			PEAKS DB
KKAPAK(+226.08)PQ	19.23	1092.61	8	3	547.315	2	31.27		13	971739	F13:11933	No	FL1029_IPP114_PB_CB_vivax_8_even.raw	tr|A5K858|A5K858_PLAVS 40S ribosomal protein S6 putative OS=Plasmodium vivax (strain Salvador I) OX=126793 GN=PVX_083000 PE=4 SV=1	Biotinylation	K6:Biotinylation:28.74	PEAKS PTM
KKKVIKEYKKVLNK	30.24	1745.13	14	1.7	437.29	4	25.57	1680000	13	969710	F13:9615	No	FL1029_IPP114_PB_CB_vivax_8_even.raw	tr|A5K858|A5K858_PLAVS 40S ribosomal protein S6 putative OS=Plasmodium vivax (strain Salvador I) OX=126793 GN=PVX_083000 PE=4 SV=1			PEAKS DB
KKNLKGAK	19.82	885.576	8	-1.9	443.794	2	19.67		13	967617	F13:7458	No	FL1029_IPP114_PB_CB_vivax_8_even.raw	tr|A5K858|A5K858_PLAVS 40S ribosomal protein S6 putative OS=Plasmodium vivax (strain Salvador I) OX=126793 GN=PVX_083000 PE=4 SV=1			PEAKS DB
KS(+79.97)IEIDDEK	15.39	1155.51	9	-0.8	578.76	2	39.14		13	974553	F13:14980	No	FL1029_IPP114_PB_CB_vivax_8_even.raw	tr|A5K858|A5K858_PLAVS 40S ribosomal protein S6 putative OS=Plasmodium vivax (strain Salvador I) OX=126793 GN=PVX_083000 PE=4 SV=1	Phosphorylation (STY)	S2:Phosphorylation (STY):1000.00	PEAKS PTM
RAISKNGKNRFIKPK	27.73	1756.06	15	-0.7	440.022	4	23.93	982000	13	969131	F13:9072	No	FL1029_IPP114_PB_CB_vivax_8_even.raw	tr|A5K858|A5K858_PLAVS 40S ribosomal protein S6 putative OS=Plasmodium vivax (strain Salvador I) OX=126793 GN=PVX_083000 PE=4 SV=1			PEAKS DB
TDEDAGKKKKVKKSL	49.61	1673.97	15	0.3	558.997	3	20.76	2530000	13	968008	F13:7873	No	FL1029_IPP114_PB_CB_vivax_8_even.raw	tr|A5K858|A5K858_PLAVS 40S ribosomal protein S6 putative OS=Plasmodium vivax (strain Salvador I) OX=126793 GN=PVX_083000 PE=4 SV=1			PEAKS DB
VKYAKKLRD	20.23	1119.68	9	-0.1	374.233	3	23.3	428000	13	968918	F13:8876	No	FL1029_IPP114_PB_CB_vivax_8_even.raw	tr|A5K8F1|A5K8F1_PLAVS 60S ribosomal protein L17 putative OS=Plasmodium vivax (strain Salvador I) OX=126793 GN=PVX_083465 PE=3 SV=1			PEAKS DB
VFPYDNTLPKYKF	23.81	1630.84	13	1	544.621	3	46.19	275000	13	977037	F13:17700	No	FL1029_IPP114_PB_CB_vivax_8_even.raw	tr|A5K8G8|A5K8G8_PLAVS Uncharacterized protein OS=Plasmodium vivax (strain Salvador I) OX=126793 GN=PVX_083555 PE=4 SV=1			PEAKS DB
EDYSPRKVAF	38.45	1210.6	10	2.3	606.308	2	33.69	614000	13	972606	F13:12869	No	FL1029_IPP114_PB_CB_vivax_8_even.raw	tr|A5K8G9|A5K8G9_PLAVS Uncharacterized protein OS=Plasmodium vivax (strain Salvador I) OX=126793 GN=PVX_083560 PE=4 SV=1			PEAKS DB
KYRQIREGLITKENK	15.19	1875.07	15	2.5	469.776	4	19.48	1010000	13	967559	F13:7398	No	FL1029_IPP114_PB_CB_vivax_8_even.raw	tr|A5K9G4|A5K9G4_PLAVS 40S ribosomal protein S24 OS=Plasmodium vivax (strain Salvador I) OX=126793 GN=PVX_080275 PE=3 SV=1			PEAKS DB
GLLRGAKKTK	24.24	1070.69	10	0.3	357.905	3	22.26	244000	13	968538	F13:8474	No	FL1029_IPP114_PB_CB_vivax_8_even.raw	tr|A5K9J0|A5K9J0_PLAVS 60S ribosomal protein L8 putative OS=Plasmodium vivax (strain Salvador I) OX=126793 GN=PVX_080405 PE=4 SV=1			PEAKS DB
AKKGEAKKGEAKK	20.12	1371.82	13	-2.8	343.961	4	19.44	4420000	13	967535	F13:7388	No	FL1029_IPP114_PB_CB_vivax_8_even.raw	tr|A5K9P1|A5K9P1_PLAVS MATH domain-containing protein OS=Plasmodium vivax (strain Salvador I) OX=126793 GN=PVX_080660 PE=4 SV=1			PEAKS DB
KTIYNFLI	18.04	1010.58	8	-2.5	506.296	2	36.61		13	973647	F13:14003	No	FL1029_IPP114_PB_CB_vivax_8_even.raw	tr|A5K9P1|A5K9P1_PLAVS MATH domain-containing protein OS=Plasmodium vivax (strain Salvador I) OX=126793 GN=PVX_080660 PE=4 SV=1			PEAKS DB
TEGSTPKPKQR	36	1227.66	11	0.3	614.836	2	19.95	1200000	13	967714	F13:7577	No	FL1029_IPP114_PB_CB_vivax_8_even.raw	tr|A5KA70|A5KA70_PLAVS Ribosomal protein L37 OS=Plasmodium vivax (strain Salvador I) OX=126793 GN=PVX_087860 PE=3 SV=1			PEAKS DB
KKSTAK(+226.08)DAKK	15.36	1329.74	10	-2.3	665.878	2	26.64		13	970093	F13:10146	No	FL1029_IPP114_PB_CB_vivax_8_even.raw	tr|A5KAB1|A5KAB1_PLAVS 60S ribosomal protein L34-A putative OS=Plasmodium vivax (strain Salvador I) OX=126793 GN=PVX_088065 PE=4 SV=1	Biotinylation	K6:Biotinylation:0.00	PEAKS PTM
NKVRPIRTPGGKLTI	35.03	1649.01	15	1.4	413.26	4	31.75	1010000	13	971915	F13:12080	No	FL1029_IPP114_PB_CB_vivax_8_even.raw	tr|A5KAB1|A5KAB1_PLAVS 60S ribosomal protein L34-A putative OS=Plasmodium vivax (strain Salvador I) OX=126793 GN=PVX_088065 PE=4 SV=1			PEAKS DB
KSIEAKKNNK	15.86	1158.67	10	-3.2	580.341	2	42.63		13	975787	F13:16326	No	FL1029_IPP114_PB_CB_vivax_8_even.raw	tr|A5KAZ9|A5KAZ9_PLAVS 60S ribosomal subunit protein L4/L1 putative OS=Plasmodium vivax (strain Salvador I) OX=126793 GN=PVX_097915 PE=4 SV=1			PEAKS DB
KIRDEIKRTFCQR	15.2	1691.93	13	-1.7	423.988	4	41.33		13	975327	F13:15820	No	FL1029_IPP114_PB_CB_vivax_8_even.raw	tr|A5KB28|A5KB28_PLAVS Uncharacterized protein OS=Plasmodium vivax (strain Salvador I) OX=126793 GN=PVX_098060 PE=4 SV=1			PEAKS DB
RSYSFNSM	15.9	990.423	8	-1.5	496.218	2	33.38		13	972496	F13:12746	No	FL1029_IPP114_PB_CB_vivax_8_even.raw	tr|A5KB42|A5KB42_PLAVS Protein kinase domain containing protein OS=Plasmodium vivax (strain Salvador I) OX=126793 GN=PVX_119250 PE=4 SV=1			PEAKS DB
GADKKKKGAVY	20.01	1163.67	11	-0.1	388.896	3	20.9	1010000	13	968058	F13:7932	No	FL1029_IPP114_PB_CB_vivax_8_even.raw	tr|A5KB61|A5KB61_PLAVS 60S Ribosomal protein L44 putative OS=Plasmodium vivax (strain Salvador I) OX=126793 GN=PVX_119345 PE=3 SV=1			PEAKS DB
KKKAKTTKKIVLK	29.3	1513.04	13	0.4	379.269	4	21.54	2170000	13	968271	F13:8167	No	FL1029_IPP114_PB_CB_vivax_8_even.raw	tr|A5KB61|A5KB61_PLAVS 60S Ribosomal protein L44 putative OS=Plasmodium vivax (strain Salvador I) OX=126793 GN=PVX_119345 PE=3 SV=1			PEAKS DB
KKKKGAVY	23.53	920.581	8	0.1	461.298	2	20.7	2260000	13	967979	F13:7856	No	FL1029_IPP114_PB_CB_vivax_8_even.raw	tr|A5KB61|A5KB61_PLAVS 60S Ribosomal protein L44 putative OS=Plasmodium vivax (strain Salvador I) OX=126793 GN=PVX_119345 PE=3 SV=1			PEAKS DB
VNVPKTRKTY	30.87	1204.69	10	0.3	402.572	3	25.67	721000	13	969744	F13:9779	No	FL1029_IPP114_PB_CB_vivax_8_even.raw	tr|A5KB61|A5KB61_PLAVS 60S Ribosomal protein L44 putative OS=Plasmodium vivax (strain Salvador I) OX=126793 GN=PVX_119345 PE=3 SV=1			PEAKS DB
VNVPKTRKTY(-.98)	19.47	1203.71	10	-0.3	402.243	3	24.83	480000	13	969447	F13:9463	No	FL1029_IPP114_PB_CB_vivax_8_even.raw	tr|A5KB61|A5KB61_PLAVS 60S Ribosomal protein L44 putative OS=Plasmodium vivax (strain Salvador I) OX=126793 GN=PVX_119345 PE=3 SV=1	Amidation	Y10:Amidation:1000.00	PEAKS PTM
ALFKEKKEKPRS	36.85	1459.85	12	-1	365.97	4	23.24	996000	13	968884	F13:8833	No	FL1029_IPP114_PB_CB_vivax_8_even.raw	tr|A5KB86|A5KB86_PLAVS 40S ribosomal protein S23 putative OS=Plasmodium vivax (strain Salvador I) OX=126793 GN=PVX_119470 PE=3 SV=1			PEAKS DB
GKVHGSLARAGKVK	19.38	1406.85	14	1.4	469.957	3	22.84	1440000	13	968734	F13:8642	No	FL1029_IPP114_PB_CB_vivax_8_even.raw	tr|A5KBT5|A5KBT5_PLAVS 40S ribosomal protein S30 OS=Plasmodium vivax (strain Salvador I) OX=126793 GN=PVX_002590 PE=3 SV=1			PEAKS DB
KNQTPKVPKVSKRK	33.94	1637.01	14	1.2	410.26	4	21.94	1300000	13	968445	F13:8343	No	FL1029_IPP114_PB_CB_vivax_8_even.raw	tr|A5KBT5|A5KBT5_PLAVS 40S ribosomal protein S30 OS=Plasmodium vivax (strain Salvador I) OX=126793 GN=PVX_002590 PE=3 SV=1			PEAKS DB
RAGKVKNQTPKVPK	35.52	1549.94	14	1.1	388.493	4	22.74	578000	13	968700	F13:8632	No	FL1029_IPP114_PB_CB_vivax_8_even.raw	tr|A5KBT5|A5KBT5_PLAVS 40S ribosomal protein S30 OS=Plasmodium vivax (strain Salvador I) OX=126793 GN=PVX_002590 PE=3 SV=1			PEAKS DB
VSKRKKLTGRAK	30.1	1370.88	12	-1.1	457.968	3	20.26	1580000	13	967818	F13:7678	No	FL1029_IPP114_PB_CB_vivax_8_even.raw	tr|A5KBT5|A5KBT5_PLAVS 40S ribosomal protein S30 OS=Plasmodium vivax (strain Salvador I) OX=126793 GN=PVX_002590 PE=3 SV=1			PEAKS DB
VSKRKKLTGRAKK	25.49	1498.98	13	0	375.752	4	20.19	1090000	13	967787	F13:7659	No	FL1029_IPP114_PB_CB_vivax_8_even.raw	tr|A5KBT5|A5KBT5_PLAVS 40S ribosomal protein S30 OS=Plasmodium vivax (strain Salvador I) OX=126793 GN=PVX_002590 PE=3 SV=1			PEAKS DB
PPKDVVPS	20.33	837.46	8	0.2	419.737	2	28.85	525000	13	970868	F13:10994	No	FL1029_IPP114_PB_CB_vivax_8_even.raw	tr|A5KCE9|A5KCE9_PLAVS RNA cytidine acetyltransferase OS=Plasmodium vivax (strain Salvador I) OX=126793 GN=PVX_001895 PE=3 SV=1			PEAKS DB
RGETDVETRQNNILL	16.52	1756.91	15	1.6	586.644	3	36.66	384000	13	973667	F13:14026	No	FL1029_IPP114_PB_CB_vivax_8_even.raw	tr|A5KCS0|A5KCS0_PLAVS Uncharacterized protein OS=Plasmodium vivax (strain Salvador I) OX=126793 GN=PVX_000010 PE=4 SV=1			PEAKS DB
KDYSDNYCEK	15.03	1263.51	10	-1.2	632.76	2	30.64		13	971518	F13:11688	No	FL1029_IPP114_PB_CB_vivax_8_even.raw	tr|A5KD88|A5KD88_PLAVS Variable surface protein Vir12-like OS=Plasmodium vivax (strain Salvador I) OX=126793 GN=PVX_077695 PE=4 SV=1			PEAKS DB
GLRLKEKD	29.39	957.561	8	1.4	320.195	3	24.39	660000	13	969289	F13:9281	No	FL1029_IPP114_PB_CB_vivax_8_even.raw	tr|A5KDT8|A5KDT8_PLAVS Uncharacterized protein OS=Plasmodium vivax (strain Salvador I) OX=126793 GN=PVX_110915 PE=4 SV=1			PEAKS DB
KKIDKKKEQLSKK	24.06	1600	13	1.7	534.343	3	19.99	1180000	13	967722	F13:7584	No	FL1029_IPP114_PB_CB_vivax_8_even.raw	tr|A5KE19|A5KE19_PLAVS Merozoite capping protein 1 putative OS=Plasmodium vivax (strain Salvador I) OX=126793 GN=PVX_111355 PE=4 SV=1			PEAKS DB
KNSVKSNKKVKKM(+15.99)IK	44.37	1775.08	15	-0.3	592.701	3	20.16	2760000	13	967782	F13:7648	No	FL1029_IPP114_PB_CB_vivax_8_even.raw	tr|A5KE19|A5KE19_PLAVS Merozoite capping protein 1 putative OS=Plasmodium vivax (strain Salvador I) OX=126793 GN=PVX_111355 PE=4 SV=1	Oxidation (M)	M13:Oxidation (M):1000.00	PEAKS PTM
NSVKSNKKVKKM(+15.99)IK	45.92	1646.99	14	1.4	550.004	3	20.19	2820000	13	967791	F13:7655	No	FL1029_IPP114_PB_CB_vivax_8_even.raw	tr|A5KE19|A5KE19_PLAVS Merozoite capping protein 1 putative OS=Plasmodium vivax (strain Salvador I) OX=126793 GN=PVX_111355 PE=4 SV=1	Oxidation (M)	M12:Oxidation (M):1000.00	PEAKS PTM
SVKSNKKVKKM(+15.99)IK	36.47	1532.94	13	0	511.988	3	20.16	2360000	13	967781	F13:7636	No	FL1029_IPP114_PB_CB_vivax_8_even.raw	tr|A5KE19|A5KE19_PLAVS Merozoite capping protein 1 putative OS=Plasmodium vivax (strain Salvador I) OX=126793 GN=PVX_111355 PE=4 SV=1	Oxidation (M)	M11:Oxidation (M):1000.00	PEAKS PTM
FAKSKQVNM(+15.99)AKTK	45.06	1495.82	13	1.9	499.614	3	20.66	1840000	14	882426	F14:7844	No	FL1029_IPP114_PB_CB_vivax_8_odd.raw	tr|A5JZ82|A5JZ82_PLAVS 60S ribosomal protein L24 putative OS=Plasmodium vivax (strain Salvador I) OX=126793 GN=PVX_122285 PE=4 SV=1	Oxidation (M)	M9:Oxidation (M):1000.00	PEAKS PTM		14	54
FAKSKQVNMAKTK	24.55	1479.82	13	0.6	494.282	3	23.26	364000	14	883318	F14:8844	No	FL1029_IPP114_PB_CB_vivax_8_odd.raw	tr|A5JZ82|A5JZ82_PLAVS 60S ribosomal protein L24 putative OS=Plasmodium vivax (strain Salvador I) OX=126793 GN=PVX_122285 PE=4 SV=1			PEAKS DB		15	42
GLTVEDIRNRKA	20.32	1370.76	12	0.5	457.928	3	30.43	534000	14	885883	F14:11602	No	FL1029_IPP114_PB_CB_vivax_8_odd.raw	tr|A5JZ82|A5JZ82_PLAVS 60S ribosomal protein L24 putative OS=Plasmodium vivax (strain Salvador I) OX=126793 GN=PVX_122285 PE=4 SV=1			PEAKS DB
KDFAKSKQV	15.8	1049.59	9	3	525.802	2	22.83	130000	14	883163	F14:8677	No	FL1029_IPP114_PB_CB_vivax_8_odd.raw	tr|A5JZ82|A5JZ82_PLAVS 60S ribosomal protein L24 putative OS=Plasmodium vivax (strain Salvador I) OX=126793 GN=PVX_122285 PE=4 SV=1			PEAKS DB
KGKSSRSGRSARS	15.54	1362.74	13	1.5	341.694	4	19.33		14	881936	F14:7333	No	FL1029_IPP114_PB_CB_vivax_8_odd.raw	tr|A5JZB7|A5JZB7_PLAVS Uncharacterized protein OS=Plasmodium vivax (strain Salvador I) OX=126793 GN=PVX_122465 PE=4 SV=1			PEAKS DB
DNNEHVVQ(+.98)EKTVSF	50.48	1645.76	14	-1.7	549.592	3	36.49	949000	14	888022	F14:13918	No	FL1029_IPP114_PB_CB_vivax_8_odd.raw	tr|A5JZN7|A5JZN7_PLAVS Alba domain-containing protein OS=Plasmodium vivax (strain Salvador I) OX=126793 GN=PVX_123060 PE=4 SV=1	Deamidation (NQ)	Q8:Deamidation (NQ):86.16	PEAKS PTM
EVSKIDKSYLAYK	20.25	1542.83	13	-1.1	515.283	3	32.23		14	886508	F14:12288	No	FL1029_IPP114_PB_CB_vivax_8_odd.raw	tr|A5JZN9|A5JZN9_PLAVS 60S ribosomal protein L13 putative OS=Plasmodium vivax (strain Salvador I) OX=126793 GN=PVX_123070 PE=3 SV=1			PEAKS DB
TTKVKRVQTF	20.48	1206.71	10	0.6	403.244	3	25.81	541000	14	884233	F14:9828	No	FL1029_IPP114_PB_CB_vivax_8_odd.raw	tr|A5JZP0|A5JZP0_PLAVS 40S ribosomal protein S16 putative OS=Plasmodium vivax (strain Salvador I) OX=126793 GN=PVX_123075 PE=3 SV=1			PEAKS DB
NFDVAAERF	17.99	1067.5	9	2.1	534.76	2	41.85	215000	14	889941	F14:16000	No	FL1029_IPP114_PB_CB_vivax_8_odd.raw	tr|A5K0F5|A5K0F5_PLAVS SHNi-TPR domain-containing protein OS=Plasmodium vivax (strain Salvador I) OX=126793 GN=PVX_084310 PE=4 SV=1			PEAKS DB
ASSEAQKL	23.45	832.429	8	-0.1	417.222	2	25.71	353000	14	884197	F14:9790	No	FL1029_IPP114_PB_CB_vivax_8_odd.raw	tr|A5K0Q2|A5K0Q2_PLAVS Mitochondrial glycoprotein domain containing protein OS=Plasmodium vivax (strain Salvador I) OX=126793 GN=PVX_084795 PE=4 SV=1			PEAKS DB
KIFDEIIVNA	17.66	1160.64	10	-0.5	581.329	2	48.98	100000	14	892471	F14:18722	No	FL1029_IPP114_PB_CB_vivax_8_odd.raw	tr|A5K0R4|A5K0R4_PLAVS DNA topoisomerase 2 OS=Plasmodium vivax (strain Salvador I) OX=126793 GN=PVX_084855 PE=3 SV=1			PEAKS DB
IKKERKKGI	16.72	1098.72	9	0.2	367.249	3	20.46	1600000	14	882334	F14:7775	No	FL1029_IPP114_PB_CB_vivax_8_odd.raw	tr|A5K0Z6|A5K0Z6_PLAVS Ribosomal protein L7a putative OS=Plasmodium vivax (strain Salvador I) OX=126793 GN=PVX_085270 PE=4 SV=1			PEAKS DB
KKDIKKERKKGIRS	22.56	1713.07	14	0.3	429.276	4	21.34	1060000	14	882642	F14:8022	No	FL1029_IPP114_PB_CB_vivax_8_odd.raw	tr|A5K0Z6|A5K0Z6_PLAVS Ribosomal protein L7a putative OS=Plasmodium vivax (strain Salvador I) OX=126793 GN=PVX_085270 PE=4 SV=1			PEAKS DB
EKLNHAVF	30.15	956.508	8	0.5	479.262	2	30.83	783000	14	886010	F14:11737	No	FL1029_IPP114_PB_CB_vivax_8_odd.raw	tr|A5K124|A5K124_PLAVS 40S ribosomal protein S25 putative OS=Plasmodium vivax (strain Salvador I) OX=126793 GN=PVX_085420 PE=4 SV=1			PEAKS DB
GKGKNKEKLNHAVFI	22.03	1681.96	15	-1.1	561.661	3	30	1090000	14	885717	F14:11395	No	FL1029_IPP114_PB_CB_vivax_8_odd.raw	tr|A5K124|A5K124_PLAVS 40S ribosomal protein S25 putative OS=Plasmodium vivax (strain Salvador I) OX=126793 GN=PVX_085420 PE=4 SV=1			PEAKS DB
KEKLNHAVF	18.68	1084.6	9	0.2	362.542	3	27.92	722000	14	884986	F14:10624	No	FL1029_IPP114_PB_CB_vivax_8_odd.raw	tr|A5K124|A5K124_PLAVS 40S ribosomal protein S25 putative OS=Plasmodium vivax (strain Salvador I) OX=126793 GN=PVX_085420 PE=4 SV=1			PEAKS DB
KKKKW(+15.99)GKGKNKE	27.4	1473.88	12	0.9	492.3	3	20.15	1380000	14	882228	F14:7641	No	FL1029_IPP114_PB_CB_vivax_8_odd.raw	tr|A5K124|A5K124_PLAVS 40S ribosomal protein S25 putative OS=Plasmodium vivax (strain Salvador I) OX=126793 GN=PVX_085420 PE=4 SV=1	Oxidation (HW)	W5:Oxidation (HW):1000.00	PEAKS PTM
PPKERKTKEQIAAA	18.43	1565.89	14	0.5	522.971	3	23.3	675000	14	883330	F14:8845	No	FL1029_IPP114_PB_CB_vivax_8_odd.raw	tr|A5K124|A5K124_PLAVS 40S ribosomal protein S25 putative OS=Plasmodium vivax (strain Salvador I) OX=126793 GN=PVX_085420 PE=4 SV=1			PEAKS DB
KDINTIIES	17.17	1031.55	9	0.7	516.783	2	36.76	389000	14	888117	F14:14036	No	FL1029_IPP114_PB_CB_vivax_8_odd.raw	tr|A5K186|A5K186_PLAVS 60S ribosomal protein L10 putative OS=Plasmodium vivax (strain Salvador I) OX=126793 GN=PVX_085735 PE=4 SV=1			PEAKS DB
DKKDDKKVKKNILK	38.57	1699.04	14	0.3	425.766	4	22.34		14	883009	F14:8474	No	FL1029_IPP114_PB_CB_vivax_8_odd.raw	tr|A5K197|A5K197_PLAVS Sperm-specific protein Don juan putative OS=Plasmodium vivax (strain Salvador I) OX=126793 GN=PVX_085790 PE=4 SV=1			PEAKS DB
DKKVKKNILK	25.18	1212.79	10	-0.7	405.271	3	21.85	3860000	14	882873	F14:8307	No	FL1029_IPP114_PB_CB_vivax_8_odd.raw	tr|A5K197|A5K197_PLAVS Sperm-specific protein Don juan putative OS=Plasmodium vivax (strain Salvador I) OX=126793 GN=PVX_085790 PE=4 SV=1			PEAKS DB
KKAPNTTKPKEDTK	16.44	1584.88	14	0.6	529.302	3	19.77		14	882091	F14:7499	No	FL1029_IPP114_PB_CB_vivax_8_odd.raw	tr|A5K197|A5K197_PLAVS Sperm-specific protein Don juan putative OS=Plasmodium vivax (strain Salvador I) OX=126793 GN=PVX_085790 PE=4 SV=1			PEAKS DB
KKDDKKVKKNILK	31.36	1584.01	13	0.9	397.01	4	22.76	678000	14	883144	F14:8600	No	FL1029_IPP114_PB_CB_vivax_8_odd.raw	tr|A5K197|A5K197_PLAVS Sperm-specific protein Don juan putative OS=Plasmodium vivax (strain Salvador I) OX=126793 GN=PVX_085790 PE=4 SV=1			PEAKS DB
KKEKAKSEKAVIKK	32.31	1614.02	14	-0.4	404.512	4	20.32	1420000	14	882284	F14:7720	No	FL1029_IPP114_PB_CB_vivax_8_odd.raw	tr|A5K197|A5K197_PLAVS Sperm-specific protein Don juan putative OS=Plasmodium vivax (strain Salvador I) OX=126793 GN=PVX_085790 PE=4 SV=1			PEAKS DB
KTINKTID	31.54	931.534	8	0.6	466.774	2	24.3	831000	14	883703	F14:9235	No	FL1029_IPP114_PB_CB_vivax_8_odd.raw	tr|A5K197|A5K197_PLAVS Sperm-specific protein Don juan putative OS=Plasmodium vivax (strain Salvador I) OX=126793 GN=PVX_085790 PE=4 SV=1			PEAKS DB
KTINKTIDKQKKAP(-.98)	27.95	1610.98	14	-0.9	403.753	4	21.64	840000	14	882754	F14:8218	No	FL1029_IPP114_PB_CB_vivax_8_odd.raw	tr|A5K197|A5K197_PLAVS Sperm-specific protein Don juan putative OS=Plasmodium vivax (strain Salvador I) OX=126793 GN=PVX_085790 PE=4 SV=1	Amidation	P14:Amidation:1000.00	PEAKS PTM
DGDHSDYNT	15.74	1022.36	9	1.7	512.187	2	35.75		14	887762	F14:13645	No	FL1029_IPP114_PB_CB_vivax_8_odd.raw	tr|A5K1M4|A5K1M4_PLAVS Uncharacterized protein OS=Plasmodium vivax (strain Salvador I) OX=126793 GN=PVX_113295 PE=4 SV=1			PEAKS DB
TEYPPLGRF	20.68	1078.54	9	1.9	540.281	2	42.83	1090000	14	890262	F14:16320	No	FL1029_IPP114_PB_CB_vivax_8_odd.raw	tr|A5K2H7|A5K2H7_PLAVS Elongation factor 1-alpha OS=Plasmodium vivax (strain Salvador I) OX=126793 GN=PVX_114830 PE=3 SV=1			PEAKS DB
TEYPPLGRFA	22.28	1149.58	10	0.9	575.799	2	42.96	748000	14	890309	F14:16359	No	FL1029_IPP114_PB_CB_vivax_8_odd.raw	tr|A5K2H7|A5K2H7_PLAVS Elongation factor 1-alpha OS=Plasmodium vivax (strain Salvador I) OX=126793 GN=PVX_114830 PE=3 SV=1			PEAKS DB
KYQSSTASALIA	15.53	1238.65	12	2	620.334	2	35.25	371000	14	887591	F14:13453	No	FL1029_IPP114_PB_CB_vivax_8_odd.raw	tr|A5K2J4|A5K2J4_PLAVS 40S ribosomal protein S13 putative OS=Plasmodium vivax (strain Salvador I) OX=126793 GN=PVX_114910 PE=3 SV=1			PEAKS DB
GADKEKKQLY	35.11	1178.63	10	1.2	590.323	2	24.17	306000	14	883652	F14:9189	No	FL1029_IPP114_PB_CB_vivax_8_odd.raw	tr|A5K303|A5K303_PLAVS 60S ribosomal protein L23a putative OS=Plasmodium vivax (strain Salvador I) OX=126793 GN=PVX_116700 PE=3 SV=1			PEAKS DB
GKKKGADKEKKQLY	21.49	1619.94	14	2.1	540.987	3	21.85	723000	14	882881	F14:8343	No	FL1029_IPP114_PB_CB_vivax_8_odd.raw	tr|A5K303|A5K303_PLAVS 60S ribosomal protein L23a putative OS=Plasmodium vivax (strain Salvador I) OX=126793 GN=PVX_116700 PE=3 SV=1			PEAKS DB
KEKKQLYKGKVK	35.15	1475.92	12	0.8	492.981	3	21.51	1810000	14	882712	F14:8142	No	FL1029_IPP114_PB_CB_vivax_8_odd.raw	tr|A5K303|A5K303_PLAVS 60S ribosomal protein L23a putative OS=Plasmodium vivax (strain Salvador I) OX=126793 GN=PVX_116700 PE=3 SV=1			PEAKS DB
KGADKEKKQLY	18.25	1306.72	11	1.5	436.583	3	22.93	304000	14	883206	F14:8705	No	FL1029_IPP114_PB_CB_vivax_8_odd.raw	tr|A5K303|A5K303_PLAVS 60S ribosomal protein L23a putative OS=Plasmodium vivax (strain Salvador I) OX=126793 GN=PVX_116700 PE=3 SV=1			PEAKS DB
KGKVKKSLGKQVGGK	28.51	1540.98	15	0.2	386.252	4	22.15	605000	14	882956	F14:8349	No	FL1029_IPP114_PB_CB_vivax_8_odd.raw	tr|A5K303|A5K303_PLAVS 60S ribosomal protein L23a putative OS=Plasmodium vivax (strain Salvador I) OX=126793 GN=PVX_116700 PE=3 SV=1			PEAKS DB
KK(+31.99)GADKEKK	16.3	1062.6	9	4.8	532.312	2	31.07		14	886089	F14:11837	No	FL1029_IPP114_PB_CB_vivax_8_odd.raw	tr|A5K303|A5K303_PLAVS 60S ribosomal protein L23a putative OS=Plasmodium vivax (strain Salvador I) OX=126793 GN=PVX_116700 PE=3 SV=1	Dihydroxy	K2:Dihydroxy:0.00	PEAKS PTM
KKKGADKEKKQLY	16.48	1562.91	13	1.3	521.979	3	21.85	1040000	14	882880	F14:8339	No	FL1029_IPP114_PB_CB_vivax_8_odd.raw	tr|A5K303|A5K303_PLAVS 60S ribosomal protein L23a putative OS=Plasmodium vivax (strain Salvador I) OX=126793 GN=PVX_116700 PE=3 SV=1			PEAKS DB
SLGKQVGGKNQQVK	21.47	1469.83	14	0.5	490.951	3	23.3	471000	14	883329	F14:8847	No	FL1029_IPP114_PB_CB_vivax_8_odd.raw	tr|A5K303|A5K303_PLAVS 60S ribosomal protein L23a putative OS=Plasmodium vivax (strain Salvador I) OX=126793 GN=PVX_116700 PE=3 SV=1			PEAKS DB
AKSKNHTNHNQNRKA	15.83	1746.9	15	0.7	583.307	3	19.57	1010000	14	882020	F14:7414	No	FL1029_IPP114_PB_CB_vivax_8_odd.raw	tr|A5K3F2|A5K3F2_PLAVS 60S ribosomal protein L29 OS=Plasmodium vivax (strain Salvador I) OX=126793 GN=PVX_117440 PE=3 SV=1			PEAKS DB
GILKKKKELKLKQ	21.11	1553.04	13	0.4	389.267	4	27.72	329000	14	884913	F14:10581	No	FL1029_IPP114_PB_CB_vivax_8_odd.raw	tr|A5K3F2|A5K3F2_PLAVS 60S ribosomal protein L29 OS=Plasmodium vivax (strain Salvador I) OX=126793 GN=PVX_117440 PE=3 SV=1			PEAKS DB
GLDPKFFK	21.8	950.523	8	-0.9	476.268	2	36.42	225000	14	888000	F14:13896	No	FL1029_IPP114_PB_CB_vivax_8_odd.raw	tr|A5K3F2|A5K3F2_PLAVS 60S ribosomal protein L29 OS=Plasmodium vivax (strain Salvador I) OX=126793 GN=PVX_117440 PE=3 SV=1			PEAKS DB
KKELKLKQKQEKKN	21.5	1769.09	14	1.5	590.704	3	21.2	1080000	14	882599	F14:8029	No	FL1029_IPP114_PB_CB_vivax_8_odd.raw	tr|A5K3F2|A5K3F2_PLAVS 60S ribosomal protein L29 OS=Plasmodium vivax (strain Salvador I) OX=126793 GN=PVX_117440 PE=3 SV=1			PEAKS DB
KKKELKLKQKQEKKN	25.56	1897.18	15	1.7	633.403	3	22.02	699000	14	882928	F14:8352	No	FL1029_IPP114_PB_CB_vivax_8_odd.raw	tr|A5K3F2|A5K3F2_PLAVS 60S ribosomal protein L29 OS=Plasmodium vivax (strain Salvador I) OX=126793 GN=PVX_117440 PE=3 SV=1			PEAKS DB
KNGIKKPKKHKFM(+15.99)S	37.15	1685.98	14	1.5	563	3	23.46	2350000	14	883386	F14:8863	No	FL1029_IPP114_PB_CB_vivax_8_odd.raw	tr|A5K3F2|A5K3F2_PLAVS 60S ribosomal protein L29 OS=Plasmodium vivax (strain Salvador I) OX=126793 GN=PVX_117440 PE=3 SV=1	Oxidation (M)	M13:Oxidation (M):1000.00	PEAKS PTM
PKFFKNQR	28.82	1063.59	8	-1.8	355.538	3	25.41	254000	14	884087	F14:9667	No	FL1029_IPP114_PB_CB_vivax_8_odd.raw	tr|A5K3F2|A5K3F2_PLAVS 60S ribosomal protein L29 OS=Plasmodium vivax (strain Salvador I) OX=126793 GN=PVX_117440 PE=3 SV=1			PEAKS DB
SRKGLDPKFFK	23.05	1321.75	11	-0.7	441.591	3	30.41		14	885867	F14:11588	No	FL1029_IPP114_PB_CB_vivax_8_odd.raw	tr|A5K3F2|A5K3F2_PLAVS 60S ribosomal protein L29 OS=Plasmodium vivax (strain Salvador I) OX=126793 GN=PVX_117440 PE=3 SV=1			PEAKS DB
KKSDYDKLDK	16.07	1238.65	10	-2.3	620.331	2	34.33		14	887266	F14:13099	No	FL1029_IPP114_PB_CB_vivax_8_odd.raw	tr|A5K3H7|A5K3H7_PLAVS Uncharacterized protein OS=Plasmodium vivax (strain Salvador I) OX=126793 GN=PVX_117570 PE=4 SV=1			PEAKS DB
KRNLKKSIKKKPKSK	18.28	1810.2	15	-0.8	453.557	4	22.15	293000	14	882957	F14:8412	No	FL1029_IPP114_PB_CB_vivax_8_odd.raw	tr|A5K4B5|A5K4B5_PLAVS 60S ribosomal protein L36 OS=Plasmodium vivax (strain Salvador I) OX=126793 GN=PVX_091145 PE=3 SV=1			PEAKS DB
RNLKKSIKKKPKS	45.15	1554.01	13	0	389.51	4	21.44	851000	14	882683	F14:8011	No	FL1029_IPP114_PB_CB_vivax_8_odd.raw	tr|A5K4B5|A5K4B5_PLAVS 60S ribosomal protein L36 OS=Plasmodium vivax (strain Salvador I) OX=126793 GN=PVX_091145 PE=3 SV=1			PEAKS DB
RNLKKSIKKKPKSK	33.23	1682.1	14	0	421.533	4	21.41	1420000	14	882673	F14:8229	No	FL1029_IPP114_PB_CB_vivax_8_odd.raw	tr|A5K4B5|A5K4B5_PLAVS 60S ribosomal protein L36 OS=Plasmodium vivax (strain Salvador I) OX=126793 GN=PVX_091145 PE=3 SV=1			PEAKS DB
KKYKNKKFKPYNLRK	19.05	1982.19	15	-0.1	496.556	4	27.95	651000	14	885000	F14:10645	No	FL1029_IPP114_PB_CB_vivax_8_odd.raw	tr|A5K4R0|A5K4R0_PLAVS 60S ribosomal protein L35 putative OS=Plasmodium vivax (strain Salvador I) OX=126793 GN=PVX_091865 PE=3 SV=1			PEAKS DB
RLELTPKQKV	27.04	1210.74	10	-2.2	404.586	3	28.79	474000	14	885282	F14:10964	No	FL1029_IPP114_PB_CB_vivax_8_odd.raw	tr|A5K4R0|A5K4R0_PLAVS 60S ribosomal protein L35 putative OS=Plasmodium vivax (strain Salvador I) OX=126793 GN=PVX_091865 PE=3 SV=1			PEAKS DB
GNAKGKKPAKKVI	26.9	1337.85	13	-0.7	446.957	3	21.24	384000	14	882608	F14:8061	No	FL1029_IPP114_PB_CB_vivax_8_odd.raw	tr|A5K584|A5K584_PLAVS 60S ribosomal protein L33-B putative OS=Plasmodium vivax (strain Salvador I) OX=126793 GN=PVX_092735 PE=3 SV=1			PEAKS DB
KGKKPAKKVI	32.28	1095.75	10	1.2	366.257	3	21	890000	14	882543	F14:7951	No	FL1029_IPP114_PB_CB_vivax_8_odd.raw	tr|A5K584|A5K584_PLAVS 60S ribosomal protein L33-B putative OS=Plasmodium vivax (strain Salvador I) OX=126793 GN=PVX_092735 PE=3 SV=1			PEAKS DB
NAKGKKPAKKVI	33.85	1280.83	12	0.1	427.95	3	21.1	419000	14	882568	F14:8010	No	FL1029_IPP114_PB_CB_vivax_8_odd.raw	tr|A5K584|A5K584_PLAVS 60S ribosomal protein L33-B putative OS=Plasmodium vivax (strain Salvador I) OX=126793 GN=PVX_092735 PE=3 SV=1			PEAKS DB
VAKKESKIIKKQK	26.26	1526.99	13	0.6	510.003	3	20.59	558000	14	882396	F14:7837	No	FL1029_IPP114_PB_CB_vivax_8_odd.raw	tr|A5K5N3|A5K5N3_PLAVS 60S ribosomal protein L22 putative OS=Plasmodium vivax (strain Salvador I) OX=126793 GN=PVX_089280 PE=4 SV=1			PEAKS DB
VAKKESKIIKKQKK	29.59	1655.08	14	-0.5	414.778	4	20.63	536000	14	882404	F14:7851	No	FL1029_IPP114_PB_CB_vivax_8_odd.raw	tr|A5K5N3|A5K5N3_PLAVS 60S ribosomal protein L22 putative OS=Plasmodium vivax (strain Salvador I) OX=126793 GN=PVX_089280 PE=4 SV=1			PEAKS DB
AVKKVGKIVK	22.03	1068.74	10	-0.8	357.253	3	22.96	214000	14	883213	F14:8716	No	FL1029_IPP114_PB_CB_vivax_8_odd.raw	tr|A5K6B0|A5K6B0_PLAVS 60S ribosomal protein L32 putative OS=Plasmodium vivax (strain Salvador I) OX=126793 GN=PVX_098640 PE=4 SV=1			PEAKS DB
AVKKVGKIVKK	22.6	1196.83	11	-1	399.951	3	21.81	4920000	14	882853	F14:8294	No	FL1029_IPP114_PB_CB_vivax_8_odd.raw	tr|A5K6B0|A5K6B0_PLAVS 60S ribosomal protein L32 putative OS=Plasmodium vivax (strain Salvador I) OX=126793 GN=PVX_098640 PE=4 SV=1			PEAKS DB
NCAQGHCSQ	17.32	946.339	9	-0.3	474.176	2	43.13		14	890388	F14:16490	No	FL1029_IPP114_PB_CB_vivax_8_odd.raw	tr|A5K6H1|A5K6H1_PLAVS Uncharacterized protein OS=Plasmodium vivax (strain Salvador I) OX=126793 GN=PVX_098950 PE=4 SV=1			PEAKS DB
DGNGKKFNKKPF	15.93	1378.74	12	1.7	460.587	3	25.44	270000	14	884099	F14:9676	No	FL1029_IPP114_PB_CB_vivax_8_odd.raw	tr|A5K7V6|A5K7V6_PLAVS RRM domain-containing protein OS=Plasmodium vivax (strain Salvador I) OX=126793 GN=PVX_082480 PE=4 SV=1			PEAKS DB
SNDDGNGKKFNKKPF	18.67	1694.84	15	1.7	565.954	3	25.85	701000	14	884245	F14:9841	No	FL1029_IPP114_PB_CB_vivax_8_odd.raw	tr|A5K7V6|A5K7V6_PLAVS RRM domain-containing protein OS=Plasmodium vivax (strain Salvador I) OX=126793 GN=PVX_082480 PE=4 SV=1			PEAKS DB
AAKRPSTY	27.56	892.477	8	0.4	447.246	2	22.93	442000	14	883208	F14:8691	No	FL1029_IPP114_PB_CB_vivax_8_odd.raw	tr|A5K851|A5K851_PLAVS 60S ribosomal protein L18a OS=Plasmodium vivax (strain Salvador I) OX=126793 GN=PVX_082965 PE=3 SV=1			PEAKS DB
VRVADNSLKTNIHQY	38.67	1756.92	15	1.3	586.649	3	31.64	1210000	14	886298	F14:12051	No	FL1029_IPP114_PB_CB_vivax_8_odd.raw	tr|A5K851|A5K851_PLAVS 60S ribosomal protein L18a OS=Plasmodium vivax (strain Salvador I) OX=126793 GN=PVX_082965 PE=3 SV=1			PEAKS DB
GPKRATKIR	22.06	1025.65	9	0.7	342.889	3	20.46	691000	14	882333	F14:7778	No	FL1029_IPP114_PB_CB_vivax_8_odd.raw	tr|A5K858|A5K858_PLAVS 40S ribosomal protein S6 putative OS=Plasmodium vivax (strain Salvador I) OX=126793 GN=PVX_083000 PE=4 SV=1			PEAKS DB
KDGVKKDVAKKD	44.35	1329.76	12	0.8	444.262	3	19.81	2080000	14	882111	F14:7532	No	FL1029_IPP114_PB_CB_vivax_8_odd.raw	tr|A5K858|A5K858_PLAVS 40S ribosomal protein S6 putative OS=Plasmodium vivax (strain Salvador I) OX=126793 GN=PVX_083000 PE=4 SV=1			PEAKS DB
KDSQKKGGKKKDKK	15.16	1601.96	14	1.6	534.994	3	19.37	127000	14	881955	F14:7368	No	FL1029_IPP114_PB_CB_vivax_8_odd.raw	tr|A5K858|A5K858_PLAVS 40S ribosomal protein S6 putative OS=Plasmodium vivax (strain Salvador I) OX=126793 GN=PVX_083000 PE=4 SV=1			PEAKS DB
KDVAKKDAGKKD	46.72	1301.73	12	-0.4	651.872	2	19.57	14200000	14	882023	F14:7421	No	FL1029_IPP114_PB_CB_vivax_8_odd.raw	tr|A5K858|A5K858_PLAVS 40S ribosomal protein S6 putative OS=Plasmodium vivax (strain Salvador I) OX=126793 GN=PVX_083000 PE=4 SV=1			PEAKS DB
KEDAKGGKKKK	18.62	1215.73	11	1.3	406.251	3	19.27	512000	14	881913	F14:7322	No	FL1029_IPP114_PB_CB_vivax_8_odd.raw	tr|A5K858|A5K858_PLAVS 40S ribosomal protein S6 putative OS=Plasmodium vivax (strain Salvador I) OX=126793 GN=PVX_083000 PE=4 SV=1			PEAKS DB
KKKVIKEYKK	21.85	1290.84	10	0.9	431.287	3	20.63	605000	14	882405	F14:7846	No	FL1029_IPP114_PB_CB_vivax_8_odd.raw	tr|A5K858|A5K858_PLAVS 40S ribosomal protein S6 putative OS=Plasmodium vivax (strain Salvador I) OX=126793 GN=PVX_083000 PE=4 SV=1			PEAKS DB
KPQKEDAKGGKK	18.11	1312.75	12	0.1	657.38	2	19.43		14	881969	F14:7369	No	FL1029_IPP114_PB_CB_vivax_8_odd.raw	tr|A5K858|A5K858_PLAVS 40S ribosomal protein S6 putative OS=Plasmodium vivax (strain Salvador I) OX=126793 GN=PVX_083000 PE=4 SV=1			PEAKS DB
NLKGAKAEEGKKD	32.99	1386.75	13	0.6	463.256	3	20.36	2130000	14	882303	F14:7736	No	FL1029_IPP114_PB_CB_vivax_8_odd.raw	tr|A5K858|A5K858_PLAVS 40S ribosomal protein S6 putative OS=Plasmodium vivax (strain Salvador I) OX=126793 GN=PVX_083000 PE=4 SV=1			PEAKS DB
ISKQNFAKNKKKAAN	24.29	1688.97	15	2	563.998	3	20.93	922000	14	882527	F14:7946	No	FL1029_IPP114_PB_CB_vivax_8_odd.raw	tr|A5K8F1|A5K8F1_PLAVS 60S ribosomal protein L17 putative OS=Plasmodium vivax (strain Salvador I) OX=126793 GN=PVX_083465 PE=3 SV=1			PEAKS DB
EDYSPRKVAFR	31.39	1366.7	11	0	456.574	3	29.76	1580000	14	885638	F14:11317	No	FL1029_IPP114_PB_CB_vivax_8_odd.raw	tr|A5K8G9|A5K8G9_PLAVS Uncharacterized protein OS=Plasmodium vivax (strain Salvador I) OX=126793 GN=PVX_083560 PE=4 SV=1			PEAKS DB
VVAPPER(+31.99)K	28.23	926.519	8	4.1	464.268	2	33.04	290000	14	886799	F14:12601	No	FL1029_IPP114_PB_CB_vivax_8_odd.raw	tr|A5K8W3|A5K8W3_PLAVS Actin OS=Plasmodium vivax (strain Salvador I) OX=126793 GN=PVX_101200 PE=3 SV=1	Dihydroxy	R7:Dihydroxy:0.00	PEAKS PTM
HHKYRVKR	20.99	1122.65	8	-1.8	375.224	3	22.32	275000	14	883001	F14:8608	No	FL1029_IPP114_PB_CB_vivax_8_odd.raw	tr|A5K9J0|A5K9J0_PLAVS 60S ribosomal protein L8 putative OS=Plasmodium vivax (strain Salvador I) OX=126793 GN=PVX_080405 PE=4 SV=1			PEAKS DB
PGRGAPLAKI	16.09	978.597	10	-1.2	327.206	3	29.73	1150000	14	885629	F14:11326	No	FL1029_IPP114_PB_CB_vivax_8_odd.raw	tr|A5K9J0|A5K9J0_PLAVS 60S ribosomal protein L8 putative OS=Plasmodium vivax (strain Salvador I) OX=126793 GN=PVX_080405 PE=4 SV=1			PEAKS DB
TGLLRGAKKTKLVG	25.53	1440.91	14	-0.1	481.312	3	30.53	622000	14	885907	F14:11624	No	FL1029_IPP114_PB_CB_vivax_8_odd.raw	tr|A5K9J0|A5K9J0_PLAVS 60S ribosomal protein L8 putative OS=Plasmodium vivax (strain Salvador I) OX=126793 GN=PVX_080405 PE=4 SV=1			PEAKS DB
GYPSAKKRRF	20.88	1208.68	10	0.1	403.9	3	24.4	726000	14	883730	F14:9266	No	FL1029_IPP114_PB_CB_vivax_8_odd.raw	tr|A5KA70|A5KA70_PLAVS Ribosomal protein L37 OS=Plasmodium vivax (strain Salvador I) OX=126793 GN=PVX_087860 PE=3 SV=1			PEAKS DB
RTPGGKLTI	15.85	941.566	9	0.2	471.79	2	29.89	595000	14	885688	F14:11380	No	FL1029_IPP114_PB_CB_vivax_8_odd.raw	tr|A5KAB1|A5KAB1_PLAVS 60S ribosomal protein L34-A putative OS=Plasmodium vivax (strain Salvador I) OX=126793 GN=PVX_088065 PE=4 SV=1			PEAKS DB
TPGGKLTI	24.35	785.465	8	-0.5	393.739	2	33.95	443000	14	887125	F14:12939	No	FL1029_IPP114_PB_CB_vivax_8_odd.raw	tr|A5KAB1|A5KAB1_PLAVS 60S ribosomal protein L34-A putative OS=Plasmodium vivax (strain Salvador I) OX=126793 GN=PVX_088065 PE=4 SV=1			PEAKS DB
VVVVKGQPRKLK	27.49	1349.89	12	-4.6	450.968	3	25.09		14	883968	F14:9536	No	FL1029_IPP114_PB_CB_vivax_8_odd.raw	tr|A5KAS9|A5KAS9_PLAVS Tryptophan-rich antigen (Pv-fam-a) OS=Plasmodium vivax (strain Salvador I) OX=126793 GN=PVX_097575 PE=4 SV=1			PEAKS DB
AVKKQKKTLKPVTK	29.89	1596.05	14	0	400.019	4	21.14	739000	14	882571	F14:8000	No	FL1029_IPP114_PB_CB_vivax_8_odd.raw	tr|A5KAW8|A5KAW8_PLAVS 60S ribosomal protein L31 putative OS=Plasmodium vivax (strain Salvador I) OX=126793 GN=PVX_097760 PE=4 SV=1			PEAKS DB
KALLPTAGDD	37.83	999.524	10	1.5	500.77	2	35.15	229000	14	887560	F14:13421	No	FL1029_IPP114_PB_CB_vivax_8_odd.raw	tr|A5KAZ9|A5KAZ9_PLAVS 60S ribosomal subunit protein L4/L1 putative OS=Plasmodium vivax (strain Salvador I) OX=126793 GN=PVX_097915 PE=4 SV=1			PEAKS DB
KM(+31.99)KKSIEAK	16.08	1093.62	9	2	547.817	2	41.66		14	889865	F14:15920	No	FL1029_IPP114_PB_CB_vivax_8_odd.raw	tr|A5KAZ9|A5KAZ9_PLAVS 60S ribosomal subunit protein L4/L1 putative OS=Plasmodium vivax (strain Salvador I) OX=126793 GN=PVX_097915 PE=4 SV=1	Sulphone	M2:Sulphone:1000.00	PEAKS PTM
KPAAPKKPA(+21.98)	29.22	928.547	9	-0.2	465.281	2	27.3		14	884745	F14:10385	No	FL1029_IPP114_PB_CB_vivax_8_odd.raw	tr|A5KB38|A5KB38_PLAVS PRESAN domain-containing protein OS=Plasmodium vivax (strain Salvador I) OX=126793 GN=PVX_119225 PE=4 SV=1	Sodium adduct	A9:Sodium adduct:1000.00	PEAKS PTM
FGGQTKPV	35.71	832.444	8	-1.3	417.229	2	27.82	494000	14	884942	F14:10587	No	FL1029_IPP114_PB_CB_vivax_8_odd.raw	tr|A5KB61|A5KB61_PLAVS 60S Ribosomal protein L44 putative OS=Plasmodium vivax (strain Salvador I) OX=126793 GN=PVX_119345 PE=3 SV=1			PEAKS DB
GQTKPVFKKKAKTTK	25.65	1689.03	15	3.1	423.266	4	20.8	634000	14	882470	F14:7900	No	FL1029_IPP114_PB_CB_vivax_8_odd.raw	tr|A5KB61|A5KB61_PLAVS 60S Ribosomal protein L44 putative OS=Plasmodium vivax (strain Salvador I) OX=126793 GN=PVX_119345 PE=3 SV=1			PEAKS DB
M(+15.99)KQKGFGGQTKPV	15.21	1420.75	13	1	474.591	3	24.6	500000	14	883805	F14:9361	No	FL1029_IPP114_PB_CB_vivax_8_odd.raw	tr|A5KB61|A5KB61_PLAVS 60S Ribosomal protein L44 putative OS=Plasmodium vivax (strain Salvador I) OX=126793 GN=PVX_119345 PE=3 SV=1	Oxidation (M)	M1:Oxidation (M):1000.00	PEAKS PTM
KSNPFRGSSHAK	22.55	1314.68	12	0.2	439.234	3	21.54	763000	14	882721	F14:8181	No	FL1029_IPP114_PB_CB_vivax_8_odd.raw	tr|A5KB86|A5KB86_PLAVS 40S ribosomal protein S23 putative OS=Plasmodium vivax (strain Salvador I) OX=126793 GN=PVX_119470 PE=3 SV=1			PEAKS DB
NKKGTPNTKKEPLL	16.12	1566.91	14	0.6	523.311	3	25.45	449000	14	884103	F14:9677	No	FL1029_IPP114_PB_CB_vivax_8_odd.raw	tr|A5KBH5|A5KBH5_PLAVS Early transcribed membrane protein (ETRAMP) OS=Plasmodium vivax (strain Salvador I) OX=126793 GN=PVX_003565 PE=4 SV=1			PEAKS DB
KKPATPKKQATPK	21.12	1421.87	13	1.3	474.965	3	19.88	807000	14	882136	F14:7552	No	FL1029_IPP114_PB_CB_vivax_8_odd.raw	tr|A5KC18|A5KC18_PLAVS Uncharacterized protein OS=Plasmodium vivax (strain Salvador I) OX=126793 GN=PVX_096030 PE=4 SV=1			PEAKS DB
TDVGDSDIIKTNE	51.76	1405.66	13	-0.3	703.836	2	36.59	308000	14	888062	F14:13971	No	FL1029_IPP114_PB_CB_vivax_8_odd.raw	tr|A5KCD7|A5KCD7_PLAVS 60S ribosomal protein L30 putative OS=Plasmodium vivax (strain Salvador I) OX=126793 GN=PVX_001835 PE=4 SV=1			PEAKS DB
NEGDPSKGEGAET	18.03	1289.54	13	3.7	645.778	2	38.73	168000	14	888834	F14:14818	No	FL1029_IPP114_PB_CB_vivax_8_odd.raw	tr|A5KDS2|A5KDS2_PLAVS Erythrocyte binding protein OS=Plasmodium vivax (strain Salvador I) OX=126793 GN=PVX_110835 PE=4 SV=1			PEAKS DB
EETLQEESNLPVKGD	35.87	1686.79	15	1.1	844.406	2	38.01	119000	14	888568	F14:14527	No	FL1029_IPP114_PB_CB_vivax_8_odd.raw	tr|A5KE06|A5KE06_PLAVS Uncharacterized protein OS=Plasmodium vivax (strain Salvador I) OX=126793 GN=PVX_111290 PE=4 SV=1			PEAKS DB
YGPLKKDLKA	33.86	1131.67	10	-0.9	378.229	3	28.12	1720000	14	885063	F14:10698	No	FL1029_IPP114_PB_CB_vivax_8_odd.raw	tr|A5KE14|A5KE14_PLAVS Ribosomal protein L3 putative OS=Plasmodium vivax (strain Salvador I) OX=126793 GN=PVX_111330 PE=3 SV=1			PEAKS DB
SNKKVKKM(+15.99)IK	29.32	1218.75	10	0	407.257	3	19.76		14	882089	F14:7494	No	FL1029_IPP114_PB_CB_vivax_8_odd.raw	tr|A5KE19|A5KE19_PLAVS Merozoite capping protein 1 putative OS=Plasmodium vivax (strain Salvador I) OX=126793 GN=PVX_111355 PE=4 SV=1	Oxidation (M)	M8:Oxidation (M):1000.00	PEAKS PTM
FEGEDEDEGE	22.21	1154.39	10	0.2	578.202	2	48.67		29	913708	F29:17571	No	FL1189_IPP114_PB_CB_vivax_6_even.raw	tr|A5K0U8|A5K0U8_PLAVS Aspartyl protease putative OS=Plasmodium vivax (strain Salvador I) OX=126793 GN=PVX_085030 PE=3 SV=1			PEAKS DB
AVPSSVASHG	19.17	910.451	10	0.3	456.233	2	27.92	176000	29	906878	F29:9959	No	FL1189_IPP114_PB_CB_vivax_6_even.raw	tr|A5K1Y1|A5K1Y1_PLAVS Transporter putative OS=Plasmodium vivax (strain Salvador I) OX=126793 GN=PVX_113850 PE=4 SV=1			PEAKS DB
LLINVFLHH	15.2	1104.64	9	-3.6	553.327	2	30.68	44100	29	907797	F29:11126	No	FL1189_IPP114_PB_CB_vivax_6_even.raw	tr|A5K210|A5K210_PLAVS Alpha adaptin putative OS=Plasmodium vivax (strain Salvador I) OX=126793 GN=PVX_113995 PE=4 SV=1			PEAKS DB
TKILIVHV	19.8	921.601	8	-0.1	461.808	2	38.38	44200	29	910321	F29:13892	No	FL1189_IPP114_PB_CB_vivax_6_even.raw	tr|A5K4W2|A5K4W2_PLAVS 60S acidic ribosomal protein P0 OS=Plasmodium vivax (strain Salvador I) OX=126793 GN=PVX_092120 PE=3 SV=1			PEAKS DB
KMKEFSDAFST	16.09	1289.6	11	3.1	430.874	3	28.38	343000	29	907027	F29:10267	No	FL1189_IPP114_PB_CB_vivax_6_even.raw	tr|A5K699|A5K699_PLAVS Reticulocyte-binding protein 1 (RBP1) putative OS=Plasmodium vivax (strain Salvador I) OX=126793 GN=PVX_098585 PE=4 SV=1			PEAKS DB
RKYKIILAF	20.45	1150.72	9	4.3	576.371	2	38.12		29	910239	F29:13787	No	FL1189_IPP114_PB_CB_vivax_6_even.raw	tr|A5K729|A5K729_PLAVS Uncharacterized protein OS=Plasmodium vivax (strain Salvador I) OX=126793 GN=PVX_100005 PE=4 SV=1			PEAKS DB
PPSGGSPNRSPP	19.78	1148.56	12	0.3	575.286	2	32.34	1140000	29	908330	F29:11683	No	FL1189_IPP114_PB_CB_vivax_6_even.raw	tr|A5K7B6|A5K7B6_PLAVS Uncharacterized protein OS=Plasmodium vivax (strain Salvador I) OX=126793 GN=PVX_094675 PE=4 SV=1			PEAKS DB
IKSKTHSI	15.23	912.539	8	-0.6	457.277	2	39.32	156000	30	930978	F30:14206	No	FL1189_IPP114_PB_CB_vivax_6_odd.raw	tr|A5JZ18|A5JZ18_PLAVS Uncharacterized protein OS=Plasmodium vivax (strain Salvador I) OX=126793 GN=PVX_121965 PE=4 SV=1			PEAKS DB		9	67
DKSYLAYKTLR	19.68	1356.74	11	-0.2	453.254	3	32.92		30	928876	F30:11912	No	FL1189_IPP114_PB_CB_vivax_6_odd.raw	tr|A5JZN9|A5JZN9_PLAVS 60S ribosomal protein L13 putative OS=Plasmodium vivax (strain Salvador I) OX=126793 GN=PVX_123070 PE=3 SV=1			PEAKS DB
KDAPPPYET	15.36	1016.48	9	1.4	509.249	2	31.98	61300	30	928569	F30:11641	No	FL1189_IPP114_PB_CB_vivax_6_odd.raw	tr|A5K0F8|A5K0F8_PLAVS Uncharacterized protein OS=Plasmodium vivax (strain Salvador I) OX=126793 GN=PVX_084325 PE=4 SV=1			PEAKS DB
RSSGLTNSRQQKMK	15	1619.85	14	-3.8	405.969	4	30.72	108000	30	928149	F30:11132	No	FL1189_IPP114_PB_CB_vivax_6_odd.raw	tr|A5K1G3|A5K1G3_PLAVS Uncharacterized protein OS=Plasmodium vivax (strain Salvador I) OX=126793 GN=PVX_086120 PE=4 SV=1			PEAKS DB
KEGLILKKPQKV	22.78	1379.89	12	0.1	460.969	3	27.87	268000	30	927207	F30:10101	No	FL1189_IPP114_PB_CB_vivax_6_odd.raw	tr|A5K1Y3|A5K1Y3_PLAVS 60S ribosomal protein L19 putative OS=Plasmodium vivax (strain Salvador I) OX=126793 GN=PVX_113860 PE=3 SV=1			PEAKS DB
IEKFEKESAEMGKG	30.99	1581.77	14	0.4	528.264	3	26.91	3200000	30	926890	F30:9741	No	FL1189_IPP114_PB_CB_vivax_6_odd.raw	tr|A5K2H7|A5K2H7_PLAVS Elongation factor 1-alpha OS=Plasmodium vivax (strain Salvador I) OX=126793 GN=PVX_114830 PE=3 SV=1			PEAKS DB
NVKGNPKAAA(-.98)	17.69	967.556	10	-0.5	484.785	2	25.53	278000	30	926429	F30:9239	No	FL1189_IPP114_PB_CB_vivax_6_odd.raw	tr|A5K303|A5K303_PLAVS 60S ribosomal protein L23a putative OS=Plasmodium vivax (strain Salvador I) OX=126793 GN=PVX_116700 PE=3 SV=1	Amidation	A10:Amidation:1000.00	PEAKS PTM
SM(+15.99)KNKKDKTPPSK	16.26	1503.81	13	-0.6	502.276	3	19.09	458000	30	924349	F30:6908	No	FL1189_IPP114_PB_CB_vivax_6_odd.raw	tr|A5K676|A5K676_PLAVS Early transcribed membrane protein (ETRAMP) OS=Plasmodium vivax (strain Salvador I) OX=126793 GN=PVX_090230 PE=4 SV=1	Oxidation (M)	M2:Oxidation (M):1000.00	PEAKS PTM
KEPIFSNT	15.57	934.476	8	-3.4	468.244	2	31.3		30	928335	F30:11334	No	FL1189_IPP114_PB_CB_vivax_6_odd.raw	tr|A5K6T7|A5K6T7_PLAVS S-adenosylmethionine synthase OS=Plasmodium vivax (strain Salvador I) OX=126793 GN=PVX_099525 PE=3 SV=1			PEAKS DB
KPAHVTSK	18.25	866.497	8	0.1	434.256	2	23.97	102000	30	925900	F30:8682	No	FL1189_IPP114_PB_CB_vivax_6_odd.raw	tr|A5K745|A5K745_PLAVS Tryptophan-rich antigen OS=Plasmodium vivax (strain Salvador I) OX=126793 GN=PVX_094305 PE=4 SV=1			PEAKS DB
GPVRGISL	20.31	797.476	8	-0.3	399.745	2	38.79	319000	30	930807	F30:14016	No	FL1189_IPP114_PB_CB_vivax_6_odd.raw	tr|A5K8T0|A5K8T0_PLAVS 40S ribosomal protein S17 putative OS=Plasmodium vivax (strain Salvador I) OX=126793 GN=PVX_101035 PE=3 SV=1			PEAKS DB
KEPLLGGLN	21.82	939.539	9	0	470.777	2	41.11	195000	30	931568	F30:14879	No	FL1189_IPP114_PB_CB_vivax_6_odd.raw	tr|A5KBH5|A5KBH5_PLAVS Early transcribed membrane protein (ETRAMP) OS=Plasmodium vivax (strain Salvador I) OX=126793 GN=PVX_003565 PE=4 SV=1			PEAKS DB
KEPLLGGLNQKQPTK	21.06	1649.95	15	-0.7	550.989	3	30.95	309000	30	928221	F30:11202	No	FL1189_IPP114_PB_CB_vivax_6_odd.raw	tr|A5KBH5|A5KBH5_PLAVS Early transcribed membrane protein (ETRAMP) OS=Plasmodium vivax (strain Salvador I) OX=126793 GN=PVX_003565 PE=4 SV=1			PEAKS DB
KSTNILGE	15.22	860.46	8	2	431.238	2	33.19		31	994157	F31:11992	No	FL1189b_IPP114_PB_CB_vivax_6_even.raw	tr|A5K0T3|A5K0T3_PLAVS 60S ribosomal protein L14 putative OS=Plasmodium vivax (strain Salvador I) OX=126793 GN=PVX_084955 PE=4 SV=1			PEAKS DB
KHIKKTKM	18.66	1012.62	8	-2.5	507.317	2	38.52		31	995900	F31:13905	No	FL1189b_IPP114_PB_CB_vivax_6_even.raw	tr|A5KBM4|A5KBM4_PLAVS Serine-repeat antigen 5 (SERA) putative OS=Plasmodium vivax (strain Salvador I) OX=126793 GN=PVX_003810 PE=3 SV=1			PEAKS DB
KKGIRSN(+.98)P	15.71	899.519	8	-0.7	450.766	2	33.62	59800	32	1014671	F32:12179	No	FL1189b_IPP114_PB_CB_vivax_6_odd.raw	tr|A5K0Z6|A5K0Z6_PLAVS Ribosomal protein L7a putative OS=Plasmodium vivax (strain Salvador I) OX=126793 GN=PVX_085270 PE=4 SV=1	Deamidation (NQ)	N7:Deamidation (NQ):1000.00	PEAKS PTM
EKKKKKHTQ	22.04	1153.69	9	3.2	385.573	3	34.22	57400	32	1014873	F32:12402	No	FL1189b_IPP114_PB_CB_vivax_6_odd.raw	tr|A5K819|A5K819_PLAVS zf-C2HC5 domain-containing protein OS=Plasmodium vivax (strain Salvador I) OX=126793 GN=PVX_082800 PE=4 SV=1			PEAKS DB

## Sheet: Human Unique pep
Peptide	-10lgP	Mass	Length	ppm	m/z	Z	RT	Intensity	Fraction	Id	Scan	from Chimera	Source File	Accession	PTM	AScore	Found By
A(+27.99)SGSGGGYGGGSGKSSHS	38.75	1523.62	18	2.7	762.821	2	23.42	214000	11	636516	F11:8895	No	FL1029_IPP114_PB_CB_vivax_7_even.raw	sp|P35527|K1C9_HUMAN Keratin type I cytoskeletal 9 OS=Homo sapiens OX=9606 GN=KRT9 PE=1 SV=3	Formylation	A1:Formylation:63.69	PEAKS PTM
A(+42.01)ALTRDPQFQKLQ	28.9	1556.83	13	-0.6	779.422	2	43.84	486000	31	997660	F31:15813	No	FL1189b_IPP114_PB_CB_vivax_6_even.raw	sp|P06744|G6PI_HUMAN Glucose-6-phosphate isomerase OS=Homo sapiens OX=9606 GN=GPI PE=1 SV=4	Acetylation (Protein N-term)	A1:Acetylation (Protein N-term):1000.00	PEAKS PTM
A(+42.01)SNDYTQQATQSY	35.4	1517.63	13	1.9	759.822	2	47.27	233000	2	757106	F2:18105	No	FL1029_IPP114_PB_CB_vivax_1_odd.raw	sp|P35637|FUS_HUMAN RNA-binding protein FUS OS=Homo sapiens OX=9606 GN=FUS PE=1 SV=1	Acetylation (Protein N-term)	A1:Acetylation (Protein N-term):1000.00	PEAKS PTM
A(+42.01)STSTTIR	24.18	877.451	8	1.8	878.459	1	31.55	648000	9	729394	F9:12031	No	FL1029_IPP114_PB_CB_vivax_6_even.raw	sp|P04259|K2C6B_HUMAN Keratin type II cytoskeletal 6B OS=Homo sapiens OX=9606 GN=KRT6B PE=1 SV=5:sp|P48668|K2C6C_HUMAN Keratin type II cytoskeletal 6C OS=Homo sapiens OX=9606 GN=KRT6C PE=1 SV=3:sp|P02538|K2C6A_HUMAN Keratin type II cytoskeletal 6A OS=Homo sapiens OX=9606 GN=KRT6A PE=1 SV=3	Acetylation (Protein N-term)	A1:Acetylation (Protein N-term):1000.00	PEAKS PTM
A(+42.01)STSTTIRSH	36.04	1101.54	10	0.5	551.778	2	27.63	322000	10	660546	F10:10521	No	FL1029_IPP114_PB_CB_vivax_6_odd.raw	sp|P04259|K2C6B_HUMAN Keratin type II cytoskeletal 6B OS=Homo sapiens OX=9606 GN=KRT6B PE=1 SV=5:sp|P48668|K2C6C_HUMAN Keratin type II cytoskeletal 6C OS=Homo sapiens OX=9606 GN=KRT6C PE=1 SV=3:sp|P02538|K2C6A_HUMAN Keratin type II cytoskeletal 6A OS=Homo sapiens OX=9606 GN=KRT6A PE=1 SV=3	Acetylation (Protein N-term)	A1:Acetylation (Protein N-term):1000.00	PEAKS PTM
A(+42.01)TTLDVQHERAYQKQEGA	40.03	2086.01	18	4.8	696.347	3	33.18	1190000	14	886850	F14:12653	No	FL1029_IPP114_PB_CB_vivax_8_odd.raw	tr|A5K7Q0|A5K7Q0_PLAVS 40S ribosomal protein S11 putative OS=Plasmodium vivax (strain Salvador I) OX=126793 GN=PVX_095350 PE=3 SV=1	Acetylation (Protein N-term)	A1:Acetylation (Protein N-term):1000.00	PEAKS PTM
A(+42.01)TVRPVANVYST	21.54	1318.69	12	3.5	660.354	2	43.3	82700	4	823113	F4:16612	No	FL1029_IPP114_PB_CB_vivax_2_odd.raw	tr|A5KAZ9|A5KAZ9_PLAVS 60S ribosomal subunit protein L4/L1 putative OS=Plasmodium vivax (strain Salvador I) OX=126793 GN=PVX_097915 PE=4 SV=1	Acetylation (Protein N-term)	A1:Acetylation (Protein N-term):1000.00	PEAKS PTM
A(+42.01)TVRPVANVYSTSNKQVVGEVEIPV	57.21	2697.43	25	1.5	1349.73	2	49.35	1450000	13	978118	F13:18913	No	FL1029_IPP114_PB_CB_vivax_8_even.raw	tr|A5KAZ9|A5KAZ9_PLAVS 60S ribosomal subunit protein L4/L1 putative OS=Plasmodium vivax (strain Salvador I) OX=126793 GN=PVX_097915 PE=4 SV=1	Acetylation (Protein N-term)	A1:Acetylation (Protein N-term):1000.00	PEAKS PTM
A(+71.04)AKPKKATKSPAKPKAVKPKAAKPK	28.59	2639.67	25	1.1	660.925	4	21.27	1890000	13	968168	F13:8056	No	FL1029_IPP114_PB_CB_vivax_8_even.raw	sp|P16401|H15_HUMAN Histone H1.5 OS=Homo sapiens OX=9606 GN=HIST1H1B PE=1 SV=3	Propionamide (K X@N-term)	A1:Propionamide (K X@N-term):12.52	PEAKS PTM
A(+87.03)AKAVKPKAAKPKVVKPKKAAPKKK	20.36	2696.76	25	2.6	899.931	3	21.9	2400000	13	968431	F13:8595	No	FL1029_IPP114_PB_CB_vivax_8_even.raw	sp|P16403|H12_HUMAN Histone H1.2 OS=Homo sapiens OX=9606 GN=HIST1H1C PE=1 SV=2	Glycidamide adduct	A1:Glycidamide adduct:0.00	PEAKS PTM
A(+87.03)PGDKGESGPSGPAGPT	29.93	1567.71	17	0.1	784.863	2	27.93	218000	31	992437	F31:10099	No	FL1189b_IPP114_PB_CB_vivax_6_even.raw	sp|P02452|CO1A1_HUMAN Collagen alpha-1(I) chain OS=Homo sapiens OX=9606 GN=COL1A1 PE=1 SV=5	Glycidamide adduct	A1:Glycidamide adduct:6.65	PEAKS PTM
AAAAASGRSK(+27.99)KKKWG	19.24	1543.86	15	0.5	515.627	3	20.86	761000	13	968046	F13:7923	No	FL1029_IPP114_PB_CB_vivax_8_even.raw	tr|A5K124|A5K124_PLAVS 40S ribosomal protein S25 putative OS=Plasmodium vivax (strain Salvador I) OX=126793 GN=PVX_085420 PE=4 SV=1	Formylation	K10:Formylation:0.00	PEAKS PTM
AAAPKKPAAPKKPAAPKKPAAPKK	26.69	2361.47	24	3.3	591.378	4	23.7	1160000	13	969054	F13:9013	No	FL1029_IPP114_PB_CB_vivax_8_even.raw	tr|A5KB38|A5KB38_PLAVS PRESAN domain-containing protein OS=Plasmodium vivax (strain Salvador I) OX=126793 GN=PVX_119225 PE=4 SV=1			PEAKS DB
AAASGNDKLGKKKGAD	16.83	1529.82	16	0.8	510.946	3	20.05	503000	14	882193	F14:7623	No	FL1029_IPP114_PB_CB_vivax_8_odd.raw	tr|A5K303|A5K303_PLAVS 60S ribosomal protein L23a putative OS=Plasmodium vivax (strain Salvador I) OX=126793 GN=PVX_116700 PE=3 SV=1			PEAKS DB
AADQAGKEVE	22.37	1016.48	10	0.2	509.246	2	23.95	228000	10	659179	F10:9116	No	FL1029_IPP114_PB_CB_vivax_6_odd.raw	sp|Q6UWP8|SBSN_HUMAN Suprabasin OS=Homo sapiens OX=9606 GN=SBSN PE=1 SV=2			PEAKS DB
AAFGGSGGRGS	17.01	922.426	11	-2.1	462.219	2	24.63	71500	10	659421	F10:9381	No	FL1029_IPP114_PB_CB_vivax_6_odd.raw	sp|P35908|K22E_HUMAN Keratin type II cytoskeletal 2 epidermal OS=Homo sapiens OX=9606 GN=KRT2 PE=1 SV=2			PEAKS DB
AAFNSGKVDIVAIND	17.97	1532.78	15	2.9	767.401	2	43.62	246000	1	845782	F1:16728	No	FL1029_IPP114_PB_CB_vivax_1_even.raw	sp|P04406|G3P_HUMAN Glyceraldehyde-3-phosphate dehydrogenase OS=Homo sapiens OX=9606 GN=GAPDH PE=1 SV=3			PEAKS DB
AAGPPISEGK	18.31	925.487	10	0.1	463.751	2	27.31		10	660420	F10:10395	No	FL1029_IPP114_PB_CB_vivax_6_odd.raw	sp|Q15517|CDSN_HUMAN Corneodesmosin OS=Homo sapiens OX=9606 GN=CDSN PE=1 SV=3			PEAKS DB
AAGPPISEGKY	22.53	1088.55	11	0.9	545.283	2	32.69	303000	10	662419	F10:12463	No	FL1029_IPP114_PB_CB_vivax_6_odd.raw	sp|Q15517|CDSN_HUMAN Corneodesmosin OS=Homo sapiens OX=9606 GN=CDSN PE=1 SV=3			PEAKS DB
AAGQAGNEAGRFG	16.24	1204.56	13	1.3	603.287	2	28.28	93000	9	727993	F9:10760	No	FL1029_IPP114_PB_CB_vivax_6_even.raw	sp|Q6UWP8|SBSN_HUMAN Suprabasin OS=Homo sapiens OX=9606 GN=SBSN PE=1 SV=2			PEAKS DB
AAGYDVEKNNSR	26.56	1322.62	12	2	662.319	2	24.39		4	816411	F4:9280	No	FL1029_IPP114_PB_CB_vivax_2_odd.raw	sp|P10412|H14_HUMAN Histone H1.4 OS=Homo sapiens OX=9606 GN=HIST1H1E PE=1 SV=2:sp|P16403|H12_HUMAN Histone H1.2 OS=Homo sapiens OX=9606 GN=HIST1H1C PE=1 SV=2:sp|P16402|H13_HUMAN Histone H1.3 OS=Homo sapiens OX=9606 GN=HIST1H1D PE=1 SV=2:sp|Q02539|H11_HUMAN Histone H1.1 OS=Homo sapiens OX=9606 GN=HIST1H1A PE=1 SV=3:sp|P22492|H1T_HUMAN Histone H1t OS=Homo sapiens OX=9606 GN=HIST1H1T PE=2 SV=4			PEAKS DB
AAKPKAAKAKKAAAKKK	35.42	1708.12	17	2	428.038	4	19.67	1860000	14	882066	F14:7485	No	FL1029_IPP114_PB_CB_vivax_8_odd.raw	sp|P16401|H15_HUMAN Histone H1.5 OS=Homo sapiens OX=9606 GN=HIST1H1B PE=1 SV=3			PEAKS DB
AAKPKAAKPKAAKPK	35.39	1503.96	15	0.2	502.328	3	19.94	737000	12	680120	F12:7583	No	FL1029_IPP114_PB_CB_vivax_7_odd.raw	sp|P16401|H15_HUMAN Histone H1.5 OS=Homo sapiens OX=9606 GN=HIST1H1B PE=1 SV=3			PEAKS DB
AAKPKAAKPKAAKPKAA	15.37	1646.04	17	1.7	824.026	2	20.65	188000	12	680381	F12:7864	No	FL1029_IPP114_PB_CB_vivax_7_odd.raw	sp|P16401|H15_HUMAN Histone H1.5 OS=Homo sapiens OX=9606 GN=HIST1H1B PE=1 SV=3			PEAKS DB
AAKPKAAKPKAAKPKAAKA	47.22	1845.17	19	2	616.064	3	20.66	863000	14	882422	F14:7858	No	FL1029_IPP114_PB_CB_vivax_8_odd.raw	sp|P16401|H15_HUMAN Histone H1.5 OS=Homo sapiens OX=9606 GN=HIST1H1B PE=1 SV=3			PEAKS DB
AAKPKTAKPKAAKPK	27.29	1533.97	15	1.1	384.501	4	19.85	1070000	14	882126	F14:7547	No	FL1029_IPP114_PB_CB_vivax_8_odd.raw	sp|P10412|H14_HUMAN Histone H1.4 OS=Homo sapiens OX=9606 GN=HIST1H1E PE=1 SV=2			PEAKS DB
AAKPKTAKPKAAKPKKA	27.64	1733.1	17	2.4	578.71	3	20.45	609000	12	680311	F12:7765	No	FL1029_IPP114_PB_CB_vivax_7_odd.raw	sp|P10412|H14_HUMAN Histone H1.4 OS=Homo sapiens OX=9606 GN=HIST1H1E PE=1 SV=2			PEAKS DB
AAKPKTAKPKAAKPKKAAA	63.01	1875.18	19	2	626.068	3	20.56	1160000	14	882382	F14:7805	No	FL1029_IPP114_PB_CB_vivax_8_odd.raw	sp|P10412|H14_HUMAN Histone H1.4 OS=Homo sapiens OX=9606 GN=HIST1H1E PE=1 SV=2			PEAKS DB
AAKPKTAKPKAAKPKKAAAK	32.71	2003.27	20	1.5	668.766	3	20.32	1390000	14	882296	F14:7718	No	FL1029_IPP114_PB_CB_vivax_8_odd.raw	sp|P10412|H14_HUMAN Histone H1.4 OS=Homo sapiens OX=9606 GN=HIST1H1E PE=1 SV=2			PEAKS DB
AAKPKTAKPKAAKPKKAAAKK	40.99	2131.37	21	1.9	711.465	3	20.46	2870000	14	882340	F14:7747	No	FL1029_IPP114_PB_CB_vivax_8_odd.raw	sp|P10412|H14_HUMAN Histone H1.4 OS=Homo sapiens OX=9606 GN=HIST1H1E PE=1 SV=2			PEAKS DB
AAKPKTAKPKAAKPKKAAAKKK	23.46	2259.46	22	2	754.163	3	20.53	8060000	14	882368	F14:7945	No	FL1029_IPP114_PB_CB_vivax_8_odd.raw	sp|P10412|H14_HUMAN Histone H1.4 OS=Homo sapiens OX=9606 GN=HIST1H1E PE=1 SV=2			PEAKS DB
AAKPKVVKPKK	27.23	1192.8	11	0.7	398.608	3	20.45	245000	12	680305	F12:7775	No	FL1029_IPP114_PB_CB_vivax_7_odd.raw	sp|P16403|H12_HUMAN Histone H1.2 OS=Homo sapiens OX=9606 GN=HIST1H1C PE=1 SV=2			PEAKS DB
AAKPKVVKPKKAAPKK	21.54	1688.12	16	0.3	563.714	3	21.34	1290000	14	882640	F14:8060	No	FL1029_IPP114_PB_CB_vivax_8_odd.raw	sp|P16403|H12_HUMAN Histone H1.2 OS=Homo sapiens OX=9606 GN=HIST1H1C PE=1 SV=2			PEAKS DB
AAKPKVVKPKKAAPKKK	24.68	1816.21	17	2.2	606.413	3	21.14	3500000	14	882579	F14:7967	No	FL1029_IPP114_PB_CB_vivax_8_odd.raw	sp|P16403|H12_HUMAN Histone H1.2 OS=Homo sapiens OX=9606 GN=HIST1H1C PE=1 SV=2			PEAKS DB
AAKRPSTY	27.56	892.477	8	0.4	447.246	2	22.93	442000	14	883208	F14:8691	No	FL1029_IPP114_PB_CB_vivax_8_odd.raw	tr|A5K851|A5K851_PLAVS 60S ribosomal protein L18a OS=Plasmodium vivax (strain Salvador I) OX=126793 GN=PVX_082965 PE=3 SV=1			PEAKS DB
AALKKAL	18.98	713.48	7	1.1	357.748	2	25.48	104000	7	794282	F7:9677	No	FL1029_IPP114_PB_CB_vivax_4_even.raw	sp|P10412|H14_HUMAN Histone H1.4 OS=Homo sapiens OX=9606 GN=HIST1H1E PE=1 SV=2:sp|P16401|H15_HUMAN Histone H1.5 OS=Homo sapiens OX=9606 GN=HIST1H1B PE=1 SV=3:sp|P16403|H12_HUMAN Histone H1.2 OS=Homo sapiens OX=9606 GN=HIST1H1C PE=1 SV=2:sp|P16402|H13_HUMAN Histone H1.3 OS=Homo sapiens OX=9606 GN=HIST1H1D PE=1 SV=2:sp|Q02539|H11_HUMAN Histone H1.1 OS=Homo sapiens OX=9606 GN=HIST1H1A PE=1 SV=3			PEAKS DB
AAPAAPAPAEK(+28.03)TPVKKK	23.65	1702.01	17	1.6	426.512	4	24.79	237000	3	861474	F3:9407	No	FL1029_IPP114_PB_CB_vivax_2_even.raw	sp|P10412|H14_HUMAN Histone H1.4 OS=Homo sapiens OX=9606 GN=HIST1H1E PE=1 SV=2	Dimethylation(KR)	K11:Dimethylation(KR):6.65	PEAKS PTM
AAPAMAPAPASAPAPA	19.27	1360.68	16	1.8	681.349	2	35.83	90000	31	995037	F31:12952	No	FL1189b_IPP114_PB_CB_vivax_6_even.raw	sp|Q14244|MAP7_HUMAN Ensconsin OS=Homo sapiens OX=9606 GN=MAP7 PE=1 SV=1			PEAKS DB
AAPGTKAPAKKAAPKKVAAPNAA	30.74	2128.25	23	1	533.07	4	24.1	2520000	13	969192	F13:9182	No	FL1029_IPP114_PB_CB_vivax_8_even.raw	tr|A5K5D6|A5K5D6_PLAVS Tryptophan-rich antigen (Pv-fam-a) OS=Plasmodium vivax (strain Salvador I) OX=126793 GN=PVX_092995 PE=4 SV=1			PEAKS DB
AAPGVDLTQ	20.43	870.445	9	0.6	871.452	1	38.26	436000	10	664336	F10:14615	No	FL1029_IPP114_PB_CB_vivax_6_odd.raw	sp|P13645|K1C10_HUMAN Keratin type I cytoskeletal 10 OS=Homo sapiens OX=9606 GN=KRT10 PE=1 SV=6			PEAKS DB
AAPGVDLTQLLNNM(+15.99)RSQ	27.12	1842.93	17	0.6	922.471	2	49.17	264000	10	668134	F10:18754	No	FL1029_IPP114_PB_CB_vivax_6_odd.raw	sp|P13645|K1C10_HUMAN Keratin type I cytoskeletal 10 OS=Homo sapiens OX=9606 GN=KRT10 PE=1 SV=6	Oxidation (M)	M14:Oxidation (M):1000.00	PEAKS PTM
AAPKKKAAQKKPAAPETSA	37.05	1892.08	19	2.3	631.703	3	21.34	780000	14	882647	F14:8101	No	FL1029_IPP114_PB_CB_vivax_8_odd.raw	tr|A5KC18|A5KC18_PLAVS Uncharacterized protein OS=Plasmodium vivax (strain Salvador I) OX=126793 GN=PVX_096030 PE=4 SV=1			PEAKS DB
AAPKKPAAPKKAAAAKK	35.38	1646.04	17	1.8	549.687	3	20.35	876000	8	702683	F8:7742	No	FL1029_IPP114_PB_CB_vivax_4_odd.raw	tr|A5KB38|A5KB38_PLAVS PRESAN domain-containing protein OS=Plasmodium vivax (strain Salvador I) OX=126793 GN=PVX_119225 PE=4 SV=1			PEAKS DB
AAPKTFT	18.48	734.396	7	3	368.207	2	25.25		5	771737	F5:9576	No	FL1029_IPP114_PB_CB_vivax_3_even.raw	tr|A5K5I6|A5K5I6_PLAVS Ubiquitin conjugation factor E4 putative OS=Plasmodium vivax (strain Salvador I) OX=126793 GN=PVX_089035 PE=4 SV=1			PEAKS DB
AAPPFTA	16.29	673.343	7	-1.1	337.679	2	34.52		5	775161	F5:13178	No	FL1029_IPP114_PB_CB_vivax_3_even.raw	sp|O75056|SDC3_HUMAN Syndecan-3 OS=Homo sapiens OX=9606 GN=SDC3 PE=1 SV=2			PEAKS DB
AAQKENAGEDPGLARQ	18.03	1653.81	16	-0.1	552.276	3	25.61	106000	10	659786	F10:9765	No	FL1029_IPP114_PB_CB_vivax_6_odd.raw	sp|P81605|DCD_HUMAN Dermcidin OS=Homo sapiens OX=9606 GN=DCD PE=1 SV=2			PEAKS DB
AAQKKPAAPETSA	16.27	1268.67	13	1.2	635.344	2	22.77	99700	4	815828	F4:8670	No	FL1029_IPP114_PB_CB_vivax_2_odd.raw	tr|A5KC18|A5KC18_PLAVS Uncharacterized protein OS=Plasmodium vivax (strain Salvador I) OX=126793 GN=PVX_096030 PE=4 SV=1			PEAKS DB
AASFKHVSPAGAAVG	17.93	1368.71	15	-0.7	685.364	2	30.86	256000	32	1013754	F32:11160	No	FL1189b_IPP114_PB_CB_vivax_6_odd.raw	sp|P31939|PUR9_HUMAN Bifunctional purine biosynthesis protein PURH OS=Homo sapiens OX=9606 GN=ATIC PE=1 SV=3			PEAKS DB
AAVPGKTF	16.17	789.438	8	3.1	395.728	2	36.62	121000	14	888072	F14:14000	No	FL1029_IPP114_PB_CB_vivax_8_odd.raw	sp|P07737|PROF1_HUMAN Profilin-1 OS=Homo sapiens OX=9606 GN=PFN1 PE=1 SV=2			PEAKS DB
AAVPSGASTGIYEALELR	28.77	1803.94	18	2.1	902.977	2	49.01	166000	14	892485	F14:18746	No	FL1029_IPP114_PB_CB_vivax_8_odd.raw	sp|P06733|ENOA_HUMAN Alpha-enolase OS=Homo sapiens OX=9606 GN=ENO1 PE=1 SV=2:sp|P09104|ENOG_HUMAN Gamma-enolase OS=Homo sapiens OX=9606 GN=ENO2 PE=1 SV=3:sp|P13929|ENOB_HUMAN Beta-enolase OS=Homo sapiens OX=9606 GN=ENO3 PE=1 SV=5:tr|A5K7I5|A5K7I5_PLAVS Enolase putative OS=Plasmodium vivax (strain Salvador I) OX=126793 GN=PVX_095015 PE=3 SV=1			PEAKS DB
AAVVVPSGEEQRY	15.55	1403.7	13	-0.1	702.859	2	36.84		30	930167	F30:13335	No	FL1189_IPP114_PB_CB_vivax_6_odd.raw	sp|Q29940|1B59_HUMAN HLA class I histocompatibility antigen B-59 alpha chain OS=Homo sapiens OX=9606 GN=HLA-B PE=1 SV=1:sp|P01889|1B07_HUMAN HLA class I histocompatibility antigen B-7 alpha chain OS=Homo sapiens OX=9606 GN=HLA-B PE=1 SV=3:sp|P30475|1B39_HUMAN HLA class I histocompatibility antigen B-39 alpha chain OS=Homo sapiens OX=9606 GN=HLA-B PE=1 SV=1:sp|Q29836|1B67_HUMAN HLA class I histoco…			PEAKS DB
AAVVVPSGEEQRYT	26.1	1504.75	14	-0.4	753.383	2	36.99	1820000	32	1015789	F32:13366	No	FL1189b_IPP114_PB_CB_vivax_6_odd.raw	sp|Q29940|1B59_HUMAN HLA class I histocompatibility antigen B-59 alpha chain OS=Homo sapiens OX=9606 GN=HLA-B PE=1 SV=1:sp|P01889|1B07_HUMAN HLA class I histocompatibility antigen B-7 alpha chain OS=Homo sapiens OX=9606 GN=HLA-B PE=1 SV=3:sp|P30475|1B39_HUMAN HLA class I histocompatibility antigen B-39 alpha chain OS=Homo sapiens OX=9606 GN=HLA-B PE=1 SV=1:sp|Q29836|1B67_HUMAN HLA class I histoco…			PEAKS DB
AAVVVPSGEEQRYTC(+119.00)	22.76	1726.77	15	0.2	576.596	3	36.2	304000	32	1015529	F32:13088	No	FL1189b_IPP114_PB_CB_vivax_6_odd.raw	sp|Q29940|1B59_HUMAN HLA class I histocompatibility antigen B-59 alpha chain OS=Homo sapiens OX=9606 GN=HLA-B PE=1 SV=1:sp|P01889|1B07_HUMAN HLA class I histocompatibility antigen B-7 alpha chain OS=Homo sapiens OX=9606 GN=HLA-B PE=1 SV=3:sp|P30475|1B39_HUMAN HLA class I histocompatibility antigen B-39 alpha chain OS=Homo sapiens OX=9606 GN=HLA-B PE=1 SV=1:sp|Q29836|1B67_HUMAN HLA class I histoco…	Cysteinylation	C15:Cysteinylation:1000.00	PEAKS PTM
AAVVVPSGEEQRYTC(+119.00)H	20.61	1863.82	16	0	622.282	3	33.03	165000	32	1014474	F32:11957	No	FL1189b_IPP114_PB_CB_vivax_6_odd.raw	sp|Q29940|1B59_HUMAN HLA class I histocompatibility antigen B-59 alpha chain OS=Homo sapiens OX=9606 GN=HLA-B PE=1 SV=1:sp|P01889|1B07_HUMAN HLA class I histocompatibility antigen B-7 alpha chain OS=Homo sapiens OX=9606 GN=HLA-B PE=1 SV=3:sp|P30475|1B39_HUMAN HLA class I histocompatibility antigen B-39 alpha chain OS=Homo sapiens OX=9606 GN=HLA-B PE=1 SV=1:sp|Q29836|1B67_HUMAN HLA class I histoco…	Cysteinylation	C15:Cysteinylation:1000.00	PEAKS PTM
AAVVVPSGQ(+.98)EQRYT	20.25	1504.75	14	-1	753.383	2	37	297000	31	995417	F31:13356	No	FL1189b_IPP114_PB_CB_vivax_6_even.raw	sp|Q31612|1B73_HUMAN HLA class I histocompatibility antigen B-73 alpha chain OS=Homo sapiens OX=9606 GN=HLA-B PE=1 SV=1:sp|Q95604|1C17_HUMAN HLA class I histocompatibility antigen Cw-17 alpha chain OS=Homo sapiens OX=9606 GN=HLA-C PE=1 SV=1:sp|P10321|1C07_HUMAN HLA class I histocompatibility antigen Cw-7 alpha chain OS=Homo sapiens OX=9606 GN=HLA-C PE=1 SV=3:sp|P10316|1A69_HUMAN HLA class I histo…	Deamidation (NQ)	Q9:Deamidation (NQ):0.00	PEAKS PTM
AC(+57.02)NLDVILGFDGSR	19.54	1535.74	14	1.7	768.879	2	50.1		12	690809	F12:19175	No	FL1029_IPP114_PB_CB_vivax_7_odd.raw	sp|P12111|CO6A3_HUMAN Collagen alpha-3(VI) chain OS=Homo sapiens OX=9606 GN=COL6A3 PE=1 SV=5	Carbamidomethylation	C2:Carbamidomethylation:1000.00	PEAKS PTM
ADDFRIK	19.13	863.45	7	-0.6	432.732	2	30.69	124000	32	1013692	F32:11110	No	FL1189b_IPP114_PB_CB_vivax_6_odd.raw	sp|O76015|KRT38_HUMAN Keratin type I cuticular Ha8 OS=Homo sapiens OX=9606 GN=KRT38 PE=1 SV=3:sp|O76014|KRT37_HUMAN Keratin type I cuticular Ha7 OS=Homo sapiens OX=9606 GN=KRT37 PE=3 SV=3			PEAKS DB
ADDFRLK	19.13	863.45	7	-0.6	432.732	2	30.69	124000	32	1013692	F32:11110	No	FL1189b_IPP114_PB_CB_vivax_6_odd.raw	sp|P13645|K1C10_HUMAN Keratin type I cytoskeletal 10 OS=Homo sapiens OX=9606 GN=KRT10 PE=1 SV=6:sp|Q7Z3Y7|K1C28_HUMAN Keratin type I cytoskeletal 28 OS=Homo sapiens OX=9606 GN=KRT28 PE=1 SV=2:sp|P19012|K1C15_HUMAN Keratin type I cytoskeletal 15 OS=Homo sapiens OX=9606 GN=KRT15 PE=1 SV=3:sp|P13646|K1C13_HUMAN Keratin type I cytoskeletal 13 OS=Homo sapiens OX=9606 GN=KRT13 PE=1 SV=4:sp|Q7Z3Y9|K1C26…			PEAKS DB
ADIN(-17.03)GLRQVLD	18.41	1195.62	11	1.3	598.818	2	47.06	134000	12	689740	F12:18003	No	FL1029_IPP114_PB_CB_vivax_7_odd.raw	sp|P35527|K1C9_HUMAN Keratin type I cytoskeletal 9 OS=Homo sapiens OX=9606 GN=KRT9 PE=1 SV=3	Ammonia-loss (N)	N4:Ammonia-loss (N):1000.00	PEAKS PTM
ADINGLRQ(+.98)VLD	22.33	1213.63	11	2.6	607.824	2	44.92		1	846266	F1:17247	No	FL1029_IPP114_PB_CB_vivax_1_even.raw	sp|P35527|K1C9_HUMAN Keratin type I cytoskeletal 9 OS=Homo sapiens OX=9606 GN=KRT9 PE=1 SV=3	Deamidation (NQ)	Q8:Deamidation (NQ):18.33	PEAKS PTM
ADINGLRQVLD	28.55	1212.65	11	0.7	607.331	2	43.78	186000	11	643772	F11:16709	No	FL1029_IPP114_PB_CB_vivax_7_even.raw	sp|P35527|K1C9_HUMAN Keratin type I cytoskeletal 9 OS=Homo sapiens OX=9606 GN=KRT9 PE=1 SV=3			PEAKS DB
ADKEKKQLY	34.49	1121.61	9	0.3	374.877	3	23.87	2720000	14	883537	F14:9059	No	FL1029_IPP114_PB_CB_vivax_8_odd.raw	tr|A5K303|A5K303_PLAVS 60S ribosomal protein L23a putative OS=Plasmodium vivax (strain Salvador I) OX=126793 GN=PVX_116700 PE=3 SV=1			PEAKS DB
ADKQLSFEEF	24.83	1212.57	10	1.3	607.291	2	44.61	148000	14	890917	F14:17067	No	FL1029_IPP114_PB_CB_vivax_8_odd.raw	sp|P06702|S10A9_HUMAN Protein S100-A9 OS=Homo sapiens OX=9606 GN=S100A9 PE=1 SV=1			PEAKS DB
ADLVICK(+14.02)T	21.47	875.479	8	0.1	438.747	2	37.74	129000	29	910126	F29:13652	No	FL1189_IPP114_PB_CB_vivax_6_even.raw	sp|P05023|AT1A1_HUMAN Sodium/potassium-transporting ATPase subunit alpha-1 OS=Homo sapiens OX=9606 GN=ATP1A1 PE=1 SV=1	Methylation(KR)	K7:Methylation(KR):1000.00	PEAKS PTM
ADVDQDGRVNY	27.41	1250.55	11	2.8	626.285	2	32.19	283000	9	729581	F9:12245	No	FL1029_IPP114_PB_CB_vivax_6_even.raw	sp|Q9NZT1|CALL5_HUMAN Calmodulin-like protein 5 OS=Homo sapiens OX=9606 GN=CALML5 PE=1 SV=2			PEAKS DB
ADYEIASKEQDFF	20.57	1561.69	13	0.7	781.855	2	46.65	75100	12	689592	F12:17849	No	FL1029_IPP114_PB_CB_vivax_7_odd.raw	sp|Q9Y383|LC7L2_HUMAN Putative RNA-binding protein Luc7-like 2 OS=Homo sapiens OX=9606 GN=LUC7L2 PE=1 SV=2			PEAKS DB
AEAALPT	15.26	671.349	7	-2.4	336.681	2	21.1		6	945708	F6:8027	No	FL1029_IPP114_PB_CB_vivax_3_odd.raw	tr|A5KBB5|A5KBB5_PLAVS Uncharacterized protein OS=Plasmodium vivax (strain Salvador I) OX=126793 GN=PVX_119615 PE=4 SV=1:#DECOY#sp|Q7Z3K3|POGZ_HUMAN Pogo transposable element with ZNF domain OS=Homo sapiens OX=9606 GN=POGZ PE=1 SV=2:#DECOY#sp|Q8NGV6|OR5H6_HUMAN Olfactory receptor 5H6 OS=Homo sapiens OX=9606 GN=OR5H6 PE=2 SV=2			PEAKS DB
AEEGKKDGVKKDVAKKD	30.21	1844	17	0	462.007	4	20.76	1340000	14	882463	F14:7883	No	FL1029_IPP114_PB_CB_vivax_8_odd.raw	tr|A5K858|A5K858_PLAVS 40S ribosomal protein S6 putative OS=Plasmodium vivax (strain Salvador I) OX=126793 GN=PVX_083000 PE=4 SV=1			PEAKS DB
AEEGKKDGVKKDVAKKDAGKKD	17.98	2343.28	22	0.4	782.1	3	21.48	513000	14	882702	F14:8173	No	FL1029_IPP114_PB_CB_vivax_8_odd.raw	tr|A5K858|A5K858_PLAVS 40S ribosomal protein S6 putative OS=Plasmodium vivax (strain Salvador I) OX=126793 GN=PVX_083000 PE=4 SV=1			PEAKS DB
AEEILEK	19.58	830.438	7	-2.5	416.226	2	29.71	418000	11	638756	F11:11311	No	FL1029_IPP114_PB_CB_vivax_7_even.raw	sp|P62913|RL11_HUMAN 60S ribosomal protein L11 OS=Homo sapiens OX=9606 GN=RPL11 PE=1 SV=2:sp|P54852|EMP3_HUMAN Epithelial membrane protein 3 OS=Homo sapiens OX=9606 GN=EMP3 PE=1 SV=1			PEAKS DB
AEEYEFLTPVEEAPK	25.76	1750.83	15	-0.4	876.422	2	48.14	145000	32	1019459	F32:17401	No	FL1189b_IPP114_PB_CB_vivax_6_odd.raw	sp|P52565|GDIR1_HUMAN Rho GDP-dissociation inhibitor 1 OS=Homo sapiens OX=9606 GN=ARHGDIA PE=1 SV=3			PEAKS DB
AEKAYHEQL	37.42	1087.53	9	1.4	544.773	2	26.87	470000	13	970175	F13:10249	No	FL1029_IPP114_PB_CB_vivax_8_even.raw	sp|P68363|TBA1B_HUMAN Tubulin alpha-1B chain OS=Homo sapiens OX=9606 GN=TUBA1B PE=1 SV=1:sp|Q71U36|TBA1A_HUMAN Tubulin alpha-1A chain OS=Homo sapiens OX=9606 GN=TUBA1A PE=1 SV=1:sp|Q9BQE3|TBA1C_HUMAN Tubulin alpha-1C chain OS=Homo sapiens OX=9606 GN=TUBA1C PE=1 SV=1:sp|P0DPH7|TBA3C_HUMAN Tubulin alpha-3C chain OS=Homo sapiens OX=9606 GN=TUBA3C PE=1 SV=1:sp|P0DPH8|TBA3D_HUMAN Tubulin alpha-3D chai…			PEAKS DB
AEKLARDLKAVKYVE	29.68	1731.99	15	-0.5	434.004	4	32.61	331000	29	908408	F29:11805	No	FL1189_IPP114_PB_CB_vivax_6_even.raw	sp|P60953|CDC42_HUMAN Cell division control protein 42 homolog OS=Homo sapiens OX=9606 GN=CDC42 PE=1 SV=2			PEAKS DB
AEMVPWE	15.45	860.374	7	3.2	431.196	2	28.09		9	727907	F9:10676	No	FL1029_IPP114_PB_CB_vivax_6_even.raw	sp|Q9BQS7|HEPH_HUMAN Hephaestin OS=Homo sapiens OX=9606 GN=HEPH PE=1 SV=3			PEAKS DB
AENEFVTIK	22.6	1049.54	9	2	525.778	2	36.41	239000	10	663665	F10:13872	No	FL1029_IPP114_PB_CB_vivax_6_odd.raw	sp|P04264|K2C1_HUMAN Keratin type II cytoskeletal 1 OS=Homo sapiens OX=9606 GN=KRT1 PE=1 SV=6			PEAKS DB
AENEFVTIKKD	22.57	1292.66	11	0.5	647.338	2	31.4	133000	6	949634	F6:12021	No	FL1029_IPP114_PB_CB_vivax_3_odd.raw	sp|P04264|K2C1_HUMAN Keratin type II cytoskeletal 1 OS=Homo sapiens OX=9606 GN=KRT1 PE=1 SV=6			PEAKS DB
AENEFVTIKKDVD	26.56	1506.76	13	1.4	503.26	3	35.36	922000	1	842931	F1:13513	No	FL1029_IPP114_PB_CB_vivax_1_even.raw	sp|P04264|K2C1_HUMAN Keratin type II cytoskeletal 1 OS=Homo sapiens OX=9606 GN=KRT1 PE=1 SV=6			PEAKS DB
AENEFVTLK	22.6	1049.54	9	2	525.778	2	36.41	239000	10	663665	F10:13872	No	FL1029_IPP114_PB_CB_vivax_6_odd.raw	sp|P04259|K2C6B_HUMAN Keratin type II cytoskeletal 6B OS=Homo sapiens OX=9606 GN=KRT6B PE=1 SV=5:sp|P48668|K2C6C_HUMAN Keratin type II cytoskeletal 6C OS=Homo sapiens OX=9606 GN=KRT6C PE=1 SV=3:sp|P02538|K2C6A_HUMAN Keratin type II cytoskeletal 6A OS=Homo sapiens OX=9606 GN=KRT6A PE=1 SV=3:sp|P12035|K2C3_HUMAN Keratin type II cytoskeletal 3 OS=Homo sapiens OX=9606 GN=KRT3 PE=1 SV=3			PEAKS DB
AENEFVTLKKD	22.57	1292.66	11	0.5	647.338	2	31.4	133000	6	949634	F6:12021	No	FL1029_IPP114_PB_CB_vivax_3_odd.raw	sp|P04259|K2C6B_HUMAN Keratin type II cytoskeletal 6B OS=Homo sapiens OX=9606 GN=KRT6B PE=1 SV=5:sp|P48668|K2C6C_HUMAN Keratin type II cytoskeletal 6C OS=Homo sapiens OX=9606 GN=KRT6C PE=1 SV=3:sp|P02538|K2C6A_HUMAN Keratin type II cytoskeletal 6A OS=Homo sapiens OX=9606 GN=KRT6A PE=1 SV=3:sp|P12035|K2C3_HUMAN Keratin type II cytoskeletal 3 OS=Homo sapiens OX=9606 GN=KRT3 PE=1 SV=3			PEAKS DB
AENEFVTLKKDVD	26.56	1506.76	13	1.4	503.26	3	35.36	922000	1	842931	F1:13513	No	FL1029_IPP114_PB_CB_vivax_1_even.raw	sp|P04259|K2C6B_HUMAN Keratin type II cytoskeletal 6B OS=Homo sapiens OX=9606 GN=KRT6B PE=1 SV=5:sp|P48668|K2C6C_HUMAN Keratin type II cytoskeletal 6C OS=Homo sapiens OX=9606 GN=KRT6C PE=1 SV=3:sp|P02538|K2C6A_HUMAN Keratin type II cytoskeletal 6A OS=Homo sapiens OX=9606 GN=KRT6A PE=1 SV=3:sp|P12035|K2C3_HUMAN Keratin type II cytoskeletal 3 OS=Homo sapiens OX=9606 GN=KRT3 PE=1 SV=3			PEAKS DB
AENGRLSNTQGVVSAF	24.58	1648.82	16	1	825.417	2	40.16	602000	11	642501	F11:15305	No	FL1029_IPP114_PB_CB_vivax_7_even.raw	sp|P48047|ATPO_HUMAN ATP synthase subunit O mitochondrial OS=Homo sapiens OX=9606 GN=ATP5PO PE=1 SV=1			PEAKS DB
AEQNRKDAEAW(+3.99)	23.53	1320.61	11	2.4	661.312	2	25.41	308000	12	682110	F12:9676	No	FL1029_IPP114_PB_CB_vivax_7_odd.raw	sp|P13645|K1C10_HUMAN Keratin type I cytoskeletal 10 OS=Homo sapiens OX=9606 GN=KRT10 PE=1 SV=6	Tryptophan oxidation to kynurenin	W11:Tryptophan oxidation to kynurenin:1000.00	PEAKS PTM
AEQNRKDAEAW(+3.99)FNEKSKEL	18.17	2296.11	19	1.4	575.035	4	34.25	489000	12	685213	F12:13062	No	FL1029_IPP114_PB_CB_vivax_7_odd.raw	sp|P13645|K1C10_HUMAN Keratin type I cytoskeletal 10 OS=Homo sapiens OX=9606 GN=KRT10 PE=1 SV=6	Tryptophan oxidation to kynurenin	W11:Tryptophan oxidation to kynurenin:1000.00	PEAKS PTM
AEQRGENALKD	19.95	1229.6	11	1.7	615.808	2	24.07	330000	14	883611	F14:9149	No	FL1029_IPP114_PB_CB_vivax_8_odd.raw	sp|P04264|K2C1_HUMAN Keratin type II cytoskeletal 1 OS=Homo sapiens OX=9606 GN=KRT1 PE=1 SV=6:sp|P19013|K2C4_HUMAN Keratin type II cytoskeletal 4 OS=Homo sapiens OX=9606 GN=KRT4 PE=1 SV=4			PEAKS DB
AEREIVRDIKEKL	19.51	1597.91	13	0	400.486	4	34.33	473000	29	908985	F29:12451	No	FL1189_IPP114_PB_CB_vivax_6_even.raw	sp|P63261|ACTG_HUMAN Actin cytoplasmic 2 OS=Homo sapiens OX=9606 GN=ACTG1 PE=1 SV=1:sp|P60709|ACTB_HUMAN Actin cytoplasmic 1 OS=Homo sapiens OX=9606 GN=ACTB PE=1 SV=1:sp|A5A3E0|POTEF_HUMAN POTE ankyrin domain family member F OS=Homo sapiens OX=9606 GN=POTEF PE=1 SV=2:sp|Q6S8J3|POTEE_HUMAN POTE ankyrin domain family member E OS=Homo sapiens OX=9606 GN=POTEE PE=2 SV=3:sp|P68032|ACTC_HUMAN Actin alp…			PEAKS DB
AFGGSGGRGSSSGGGY	29.37	1359.58	16	2	680.799	2	28.34	178000	10	660826	F10:10787	No	FL1029_IPP114_PB_CB_vivax_6_odd.raw	sp|P35908|K22E_HUMAN Keratin type II cytoskeletal 2 epidermal OS=Homo sapiens OX=9606 GN=KRT2 PE=1 SV=2			PEAKS DB
AGEDGHP(+31.99)GKPGRPGE	15.6	1491.67	15	-0.1	498.231	3	19.69	732000	31	989838	F31:7088	No	FL1189b_IPP114_PB_CB_vivax_6_even.raw	sp|P08123|CO1A2_HUMAN Collagen alpha-2(I) chain OS=Homo sapiens OX=9606 GN=COL1A2 PE=1 SV=7	Dihydroxy	P7:Dihydroxy:0.00	PEAKS PTM
AGEDPGL	20.14	657.297	7	1.2	658.305	1	34.54	624000	9	730350	F9:13176	No	FL1029_IPP114_PB_CB_vivax_6_even.raw	sp|P81605|DCD_HUMAN Dermcidin OS=Homo sapiens OX=9606 GN=DCD PE=1 SV=2			PEAKS DB
AGEDPGLAR	20.53	884.435	9	0	443.225	2	27.27	502000	9	727571	F9:10359	No	FL1029_IPP114_PB_CB_vivax_6_even.raw	sp|P81605|DCD_HUMAN Dermcidin OS=Homo sapiens OX=9606 GN=DCD PE=1 SV=2			PEAKS DB
AGEVGKPGE	18.03	842.413	9	0.3	422.214	2	24.24	93600	31	991172	F31:8754	No	FL1189b_IPP114_PB_CB_vivax_6_even.raw	sp|P08123|CO1A2_HUMAN Collagen alpha-2(I) chain OS=Homo sapiens OX=9606 GN=COL1A2 PE=1 SV=7			PEAKS DB
AGFYEMGC	15.04	876.315	8	1.9	439.165	2	42.87		3	867878	F3:16383	No	FL1029_IPP114_PB_CB_vivax_2_even.raw	sp|Q9H3Z7|ABHGB_HUMAN Protein ABHD16B OS=Homo sapiens OX=9606 GN=ABHD16B PE=3 SV=1			PEAKS DB
AGGGFGSR	19.56	707.335	8	-1.2	354.674	2	24.26	85700	10	659291	F10:9246	No	FL1029_IPP114_PB_CB_vivax_6_odd.raw	sp|P04264|K2C1_HUMAN Keratin type II cytoskeletal 1 OS=Homo sapiens OX=9606 GN=KRT1 PE=1 SV=6			PEAKS DB
AGGGFGSRS	26.07	794.367	9	-1.9	398.19	2	24.46	339000	11	636884	F11:9283	No	FL1029_IPP114_PB_CB_vivax_7_even.raw	sp|P04264|K2C1_HUMAN Keratin type II cytoskeletal 1 OS=Homo sapiens OX=9606 GN=KRT1 PE=1 SV=6			PEAKS DB
AGKAPRKQLASKAARKSAPI	16.12	2048.23	20	-0.3	513.065	4	26.82	220000	8	704966	F8:10147	No	FL1029_IPP114_PB_CB_vivax_4_odd.raw	tr|A5K1U7|A5K1U7_PLAVS Histone H3 OS=Plasmodium vivax (strain Salvador I) OX=126793 GN=PVX_113665 PE=3 SV=1			PEAKS DB
AGKEGNNPAENGDAKTDQA	32.94	1885.84	19	1.7	629.622	3	23.41	454000	4	816084	F4:8894	No	FL1029_IPP114_PB_CB_vivax_2_odd.raw	sp|P05204|HMGN2_HUMAN Non-histone chromosomal protein HMG-17 OS=Homo sapiens OX=9606 GN=HMGN2 PE=1 SV=3			PEAKS DB
AGKEKDDKKKGKD	49.44	1445.78	13	1.7	482.936	3	19.34	1680000	14	881941	F14:7335	No	FL1029_IPP114_PB_CB_vivax_8_odd.raw	tr|A5JZ82|A5JZ82_PLAVS 60S ribosomal protein L24 putative OS=Plasmodium vivax (strain Salvador I) OX=126793 GN=PVX_122285 PE=4 SV=1			PEAKS DB
AGKEKDDKKKGKDDKKKNAAHFQQK	39.26	2869.55	25	1.3	718.396	4	20.12	1500000	13	967775	F13:7633	No	FL1029_IPP114_PB_CB_vivax_8_even.raw	tr|A5JZ82|A5JZ82_PLAVS 60S ribosomal protein L24 putative OS=Plasmodium vivax (strain Salvador I) OX=126793 GN=PVX_122285 PE=4 SV=1			PEAKS DB
AGKKDGAKKEVA	29.09	1200.68	12	1.1	601.349	2	19.67	907000	4	814709	F4:7486	No	FL1029_IPP114_PB_CB_vivax_2_odd.raw	tr|A5K858|A5K858_PLAVS 40S ribosomal protein S6 putative OS=Plasmodium vivax (strain Salvador I) OX=126793 GN=PVX_083000 PE=4 SV=1			PEAKS DB
AGKVKNQTPKVPKVSKRK	19.47	1992.23	18	1.1	665.085	3	23.13	652000	13	968840	F13:8801	No	FL1029_IPP114_PB_CB_vivax_8_even.raw	tr|A5KBT5|A5KBT5_PLAVS 40S ribosomal protein S30 OS=Plasmodium vivax (strain Salvador I) OX=126793 GN=PVX_002590 PE=3 SV=1			PEAKS DB
AGLQFPVGR	19.52	943.524	9	0.2	472.769	2	42.23	110000	29	911597	F29:15286	No	FL1189_IPP114_PB_CB_vivax_6_even.raw	tr|A5K214|A5K214_PLAVS Histone H2A OS=Plasmodium vivax (strain Salvador I) OX=126793 GN=PVX_114015 PE=3 SV=1:sp|P0C0S8|H2A1_HUMAN Histone H2A type 1 OS=Homo sapiens OX=9606 GN=HIST1H2AG PE=1 SV=2:sp|Q93077|H2A1C_HUMAN Histone H2A type 1-C OS=Homo sapiens OX=9606 GN=HIST1H2AC PE=1 SV=3:sp|P20671|H2A1D_HUMAN Histone H2A type 1-D OS=Homo sapiens OX=9606 GN=HIST1H2AD PE=1 SV=2:sp|P04908|H2A1B_HUMAN H…			PEAKS DB
AGPAGAAGQP(+15.99)GAKGE	37.22	1253.6	15	-0.2	627.807	2	25.22	324000	29	905964	F29:9113	No	FL1189_IPP114_PB_CB_vivax_6_even.raw	sp|P08123|CO1A2_HUMAN Collagen alpha-2(I) chain OS=Homo sapiens OX=9606 GN=COL1A2 PE=1 SV=7	Oxidation or Hydroxylation	P10:Oxidation or Hydroxylation:0.00	PEAKS PTM
AGPAGAAGQP(+31.99)GAK	24.47	1083.53	13	3.7	542.775	2	21.37	137000	29	904718	F29:7725	No	FL1189_IPP114_PB_CB_vivax_6_even.raw	sp|P08123|CO1A2_HUMAN Collagen alpha-2(I) chain OS=Homo sapiens OX=9606 GN=COL1A2 PE=1 SV=7	Dihydroxy	P10:Dihydroxy:0.00	PEAKS PTM
AGPAGAAGQP(+31.99)GAKGE	38.57	1269.59	15	-0.3	635.804	2	23.68	1220000	31	990996	F31:8539	No	FL1189b_IPP114_PB_CB_vivax_6_even.raw	sp|P08123|CO1A2_HUMAN Collagen alpha-2(I) chain OS=Homo sapiens OX=9606 GN=COL1A2 PE=1 SV=7	Dihydroxy	P10:Dihydroxy:0.00	PEAKS PTM
AGPAGAAGQPGAK(+15.99)GE	30.58	1253.6	15	-0.5	627.807	2	25.19	194000	32	1011854	F32:9100	No	FL1189b_IPP114_PB_CB_vivax_6_odd.raw	sp|P08123|CO1A2_HUMAN Collagen alpha-2(I) chain OS=Homo sapiens OX=9606 GN=COL1A2 PE=1 SV=7	Oxidation or Hydroxylation	K13:Oxidation or Hydroxylation:7.77	PEAKS PTM
AGPAGAAGQPGAK(+31.99)GE	43	1269.59	15	0.7	635.805	2	23.78	496000	32	1011380	F32:8573	No	FL1189b_IPP114_PB_CB_vivax_6_odd.raw	sp|P08123|CO1A2_HUMAN Collagen alpha-2(I) chain OS=Homo sapiens OX=9606 GN=COL1A2 PE=1 SV=7	Dihydroxy	K13:Dihydroxy:0.00	PEAKS PTM
AGPRGEVGL	15.34	854.461	9	0.3	428.238	2	34.37	132000	31	994563	F31:12420	No	FL1189b_IPP114_PB_CB_vivax_6_even.raw	sp|P08123|CO1A2_HUMAN Collagen alpha-2(I) chain OS=Homo sapiens OX=9606 GN=COL1A2 PE=1 SV=7			PEAKS DB
AGQLVFLATEGDHLQ	25.98	1597.81	15	-0.9	799.912	2	49.05	223000	32	1019743	F32:17702	No	FL1189b_IPP114_PB_CB_vivax_6_odd.raw	sp|P50897|PPT1_HUMAN Palmitoyl-protein thioesterase 1 OS=Homo sapiens OX=9606 GN=PPT1 PE=1 SV=1			PEAKS DB
AGRDLTDY	15.48	909.419	8	0.1	455.717	2	31.99	218000	11	639578	F11:12172	No	FL1029_IPP114_PB_CB_vivax_7_even.raw	sp|P63261|ACTG_HUMAN Actin cytoplasmic 2 OS=Homo sapiens OX=9606 GN=ACTG1 PE=1 SV=1:sp|P60709|ACTB_HUMAN Actin cytoplasmic 1 OS=Homo sapiens OX=9606 GN=ACTB PE=1 SV=1:sp|P68032|ACTC_HUMAN Actin alpha cardiac muscle 1 OS=Homo sapiens OX=9606 GN=ACTC1 PE=1 SV=1:sp|P62736|ACTA_HUMAN Actin aortic smooth muscle OS=Homo sapiens OX=9606 GN=ACTA2 PE=1 SV=1:sp|P68133|ACTS_HUMAN Actin alpha skeletal muscle…			PEAKS DB
AGRHGDSVRNS	28.09	1154.55	11	-0.5	385.858	3	19.72	214000	10	657777	F10:7478	No	FL1029_IPP114_PB_CB_vivax_6_odd.raw	sp|P04264|K2C1_HUMAN Keratin type II cytoskeletal 1 OS=Homo sapiens OX=9606 GN=KRT1 PE=1 SV=6			PEAKS DB
AGVAAPATQ	16.27	784.408	9	0	393.211	2	23.67	38000	29	905442	F29:8575	No	FL1189_IPP114_PB_CB_vivax_6_even.raw	sp|Q15149|PLEC_HUMAN Plectin OS=Homo sapiens OX=9606 GN=PLEC PE=1 SV=3			PEAKS DB
AGVANALAHK	30.61	950.53	10	-0.4	476.272	2	26.96	217000	11	637774	F11:10242	No	FL1029_IPP114_PB_CB_vivax_7_even.raw	sp|P68871|HBB_HUMAN Hemoglobin subunit beta OS=Homo sapiens OX=9606 GN=HBB PE=1 SV=2:sp|P02042|HBD_HUMAN Hemoglobin subunit delta OS=Homo sapiens OX=9606 GN=HBD PE=1 SV=2			PEAKS DB
AGVANALAHKYH	34.49	1250.65	12	-0.5	417.891	3	28.65	567000	12	683224	F12:10911	No	FL1029_IPP114_PB_CB_vivax_7_odd.raw	sp|P68871|HBB_HUMAN Hemoglobin subunit beta OS=Homo sapiens OX=9606 GN=HBB PE=1 SV=2:sp|P02042|HBD_HUMAN Hemoglobin subunit delta OS=Homo sapiens OX=9606 GN=HBD PE=1 SV=2			PEAKS DB
AGVRNPQQHL	21.68	1118.59	10	2.6	560.306	2	25.9	371000	5	771955	F5:9818	No	FL1029_IPP114_PB_CB_vivax_3_even.raw	sp|P11940|PABP1_HUMAN Polyadenylate-binding protein 1 OS=Homo sapiens OX=9606 GN=PABPC1 PE=1 SV=2			PEAKS DB
AHGASRY	17.99	760.362	7	-1.1	381.188	2	21.26	362000	13	968167	F13:8070	No	FL1029_IPP114_PB_CB_vivax_8_even.raw	tr|A5K5A1|A5K5A1_PLAVS 60S ribosomal protein L41 putative OS=Plasmodium vivax (strain Salvador I) OX=126793 GN=PVX_092820 PE=4 SV=1			PEAKS DB
AHGKKVL	24.46	751.471	7	-0.8	376.742	2	21.28	259000	30	925051	F30:7713	No	FL1189_IPP114_PB_CB_vivax_6_odd.raw	sp|P68871|HBB_HUMAN Hemoglobin subunit beta OS=Homo sapiens OX=9606 GN=HBB PE=1 SV=2:sp|P02042|HBD_HUMAN Hemoglobin subunit delta OS=Homo sapiens OX=9606 GN=HBD PE=1 SV=2:sp|P69892|HBG2_HUMAN Hemoglobin subunit gamma-2 OS=Homo sapiens OX=9606 GN=HBG2 PE=1 SV=2:sp|P69891|HBG1_HUMAN Hemoglobin subunit gamma-1 OS=Homo sapiens OX=9606 GN=HBG1 PE=1 SV=2:sp|P02100|HBE_HUMAN Hemoglobin subunit epsilon O…			PEAKS DB
AHGKKVLG	31.39	808.492	8	0.3	405.253	2	21.6		14	882743	F14:8196	No	FL1029_IPP114_PB_CB_vivax_8_odd.raw	sp|P68871|HBB_HUMAN Hemoglobin subunit beta OS=Homo sapiens OX=9606 GN=HBB PE=1 SV=2:sp|P02042|HBD_HUMAN Hemoglobin subunit delta OS=Homo sapiens OX=9606 GN=HBD PE=1 SV=2			PEAKS DB
AHLSSSQFSSGSQSSRD	18.17	1766.78	17	-0.4	589.934	3	27.18		7	794891	F7:10319	No	FL1029_IPP114_PB_CB_vivax_4_even.raw	sp|P02533|K1C14_HUMAN Keratin type I cytoskeletal 14 OS=Homo sapiens OX=9606 GN=KRT14 PE=1 SV=4			PEAKS DB
AIEPSLAQLAQK	37.49	1267.71	12	2.7	634.866	2	41.44	306000	13	975366	F13:15853	No	FL1029_IPP114_PB_CB_vivax_8_even.raw	tr|A5K2R4|A5K2R4_PLAVS Ubiquitin/ribosomal putative OS=Plasmodium vivax (strain Salvador I) OX=126793 GN=PVX_115255 PE=4 SV=1			PEAKS DB
AIEPSLAQLAQKY	17.96	1430.78	13	1.1	716.396	2	46.78		5	779434	F5:17932	No	FL1029_IPP114_PB_CB_vivax_3_even.raw	tr|A5K2R4|A5K2R4_PLAVS Ubiquitin/ribosomal putative OS=Plasmodium vivax (strain Salvador I) OX=126793 GN=PVX_115255 PE=4 SV=1			PEAKS DB
AIEPSLAQLAQKYN(-.98)	39.4	1543.84	14	0.1	772.925	2	45.22	286000	13	976716	F13:17331	No	FL1029_IPP114_PB_CB_vivax_8_even.raw	tr|A5K2R4|A5K2R4_PLAVS Ubiquitin/ribosomal putative OS=Plasmodium vivax (strain Salvador I) OX=126793 GN=PVX_115255 PE=4 SV=1	Amidation	N14:Amidation:1000.00	PEAKS PTM
AINLYPDGPEKRAEN	17.31	1685.84	15	-0.5	562.953	3	35.04	546000	32	1015139	F32:12658	No	FL1189b_IPP114_PB_CB_vivax_6_odd.raw	sp|Q9NU53|GINM1_HUMAN Glycoprotein integral membrane protein 1 OS=Homo sapiens OX=9606 GN=GINM1 PE=2 SV=1			PEAKS DB
AINLYPDGPEKRAENL	17.17	1798.92	16	0.5	600.648	3	39.96		29	910849	F29:14451	No	FL1189_IPP114_PB_CB_vivax_6_even.raw	sp|Q9NU53|GINM1_HUMAN Glycoprotein integral membrane protein 1 OS=Homo sapiens OX=9606 GN=GINM1 PE=2 SV=1			PEAKS DB
AIVDKVPSV	26.01	926.544	9	1	464.279	2	38.36	461000	14	888683	F14:14644	No	FL1029_IPP114_PB_CB_vivax_8_odd.raw	sp|Q9Y678|COPG1_HUMAN Coatomer subunit gamma-1 OS=Homo sapiens OX=9606 GN=COPG1 PE=1 SV=1			PEAKS DB
AKAAAK(+42.02)PK	16.47	825.518	8	-2.4	413.765	2	23.3		8	703712	F8:8867	No	FL1029_IPP114_PB_CB_vivax_4_odd.raw	sp|P16401|H15_HUMAN Histone H1.5 OS=Homo sapiens OX=9606 GN=HIST1H1B PE=1 SV=3	Guanidination	K6:Guanidination:5.99	PEAKS PTM
AKADGIVSKNF	31.22	1148.62	11	1.8	575.318	2	31.35	471000	2	751585	F2:11930	No	FL1029_IPP114_PB_CB_vivax_1_odd.raw	sp|P63220|RS21_HUMAN 40S ribosomal protein S21 OS=Homo sapiens OX=9606 GN=RPS21 PE=1 SV=1			PEAKS DB
AKAVKKQKKTLKPV	35.75	1566.03	14	-1.4	392.515	4	21.64	1420000	13	968305	F13:8206	No	FL1029_IPP114_PB_CB_vivax_8_even.raw	tr|A5KAW8|A5KAW8_PLAVS 60S ribosomal protein L31 putative OS=Plasmodium vivax (strain Salvador I) OX=126793 GN=PVX_097760 PE=4 SV=1			PEAKS DB
AKAVKKQKKTLKPVTK	31.01	1795.18	16	-0.2	449.801	4	19.94	463000	32	1010215	F32:7183	No	FL1189b_IPP114_PB_CB_vivax_6_odd.raw	tr|A5KAW8|A5KAW8_PLAVS 60S ribosomal protein L31 putative OS=Plasmodium vivax (strain Salvador I) OX=126793 GN=PVX_097760 PE=4 SV=1			PEAKS DB
AKAVKKQKKTLKPVTKVI	25.16	2007.33	18	0.5	502.84	4	24.67	1220000	32	1011677	F32:8895	No	FL1189b_IPP114_PB_CB_vivax_6_odd.raw	tr|A5KAW8|A5KAW8_PLAVS 60S ribosomal protein L31 putative OS=Plasmodium vivax (strain Salvador I) OX=126793 GN=PVX_097760 PE=4 SV=1			PEAKS DB
AKAVKKQKKTLKPVTKVITI	20.37	2221.46	20	0.9	556.373	4	29.85	7070000	13	971245	F13:11604	No	FL1029_IPP114_PB_CB_vivax_8_even.raw	tr|A5KAW8|A5KAW8_PLAVS 60S ribosomal protein L31 putative OS=Plasmodium vivax (strain Salvador I) OX=126793 GN=PVX_097760 PE=4 SV=1			PEAKS DB
AKDIGFIKLD	36.78	1118.63	10	0.3	560.324	2	40.74	1240000	14	889523	F14:15563	No	FL1029_IPP114_PB_CB_vivax_8_odd.raw	sp|P62273|RS29_HUMAN 40S ribosomal protein S29 OS=Homo sapiens OX=9606 GN=RPS29 PE=1 SV=2			PEAKS DB
AKDKKQLKKPS	42.33	1269.78	11	0.5	424.266	3	19.85	2000000	14	882127	F14:7545	No	FL1029_IPP114_PB_CB_vivax_8_odd.raw	tr|A5K0Z6|A5K0Z6_PLAVS Ribosomal protein L7a putative OS=Plasmodium vivax (strain Salvador I) OX=126793 GN=PVX_085270 PE=4 SV=1			PEAKS DB
AKDKKQLKKPSKKTPAP	15.37	1892.16	17	0.5	474.047	4	22.5		14	883069	F14:8537	No	FL1029_IPP114_PB_CB_vivax_8_odd.raw	tr|A5K0Z6|A5K0Z6_PLAVS Ribosomal protein L7a putative OS=Plasmodium vivax (strain Salvador I) OX=126793 GN=PVX_085270 PE=4 SV=1			PEAKS DB
AKDNKGKVKKAAGEETVKY	25.41	2063.14	19	2.6	516.793	4	24.43	1550000	13	969304	F13:9286	No	FL1029_IPP114_PB_CB_vivax_8_even.raw	tr|A5K826|A5K826_PLAVS 60S ribosomal protein L6 putative OS=Plasmodium vivax (strain Salvador I) OX=126793 GN=PVX_082840 PE=4 SV=1			PEAKS DB
AKHSSSG	18.66	672.319	7	-2.1	337.166	2	23.39		9	726150	F9:8877	No	FL1029_IPP114_PB_CB_vivax_6_even.raw	sp|P51826|AFF3_HUMAN AF4/FMR2 family member 3 OS=Homo sapiens OX=9606 GN=AFF3 PE=1 SV=3			PEAKS DB
AKKADAKKADAKK	27.73	1371.82	13	-1.4	458.28	3	19.44	15900000	13	967540	F13:7384	No	FL1029_IPP114_PB_CB_vivax_8_even.raw	tr|A5K7E3|A5K7E3_PLAVS QF122 antigen putative OS=Plasmodium vivax (strain Salvador I) OX=126793 GN=PVX_094810 PE=4 SV=1			PEAKS DB
AKKAGAAKAKKPAGAAKKPK	28.87	1919.22	20	2	640.747	3	20.02	762000	14	882183	F14:7618	No	FL1029_IPP114_PB_CB_vivax_8_odd.raw	sp|P10412|H14_HUMAN Histone H1.4 OS=Homo sapiens OX=9606 GN=HIST1H1E PE=1 SV=2			PEAKS DB
AKKGEAKKDDAKKADAKKADAKK	18.07	2442.39	23	1.3	611.606	4	19.75	1670000	14	882088	F14:7500	No	FL1029_IPP114_PB_CB_vivax_8_odd.raw	tr|A5K7E3|A5K7E3_PLAVS QF122 antigen putative OS=Plasmodium vivax (strain Salvador I) OX=126793 GN=PVX_094810 PE=4 SV=1			PEAKS DB
AKKGEAKKGEAKK	18.31	1371.82	13	-0.8	686.917	2	19.44	5430000	13	967550	F13:7386	No	FL1029_IPP114_PB_CB_vivax_8_even.raw	tr|A5K9P1|A5K9P1_PLAVS MATH domain-containing protein OS=Plasmodium vivax (strain Salvador I) OX=126793 GN=PVX_080660 PE=4 SV=1			PEAKS DB
AKKPAGAAKKPKKATGAATPK	18.42	2019.23	21	1.1	674.085	3	21.2	1120000	14	882600	F14:8001	No	FL1029_IPP114_PB_CB_vivax_8_odd.raw	sp|P10412|H14_HUMAN Histone H1.4 OS=Homo sapiens OX=9606 GN=HIST1H1E PE=1 SV=2			PEAKS DB
AKKPAGAAKKPKKATGAATPKKSA	23.11	2305.4	24	0	577.356	4	21.48	460000	14	882698	F14:8121	No	FL1029_IPP114_PB_CB_vivax_8_odd.raw	sp|P10412|H14_HUMAN Histone H1.4 OS=Homo sapiens OX=9606 GN=HIST1H1E PE=1 SV=2			PEAKS DB
AKKSKKSAGDNINAKL	18.51	1671.96	16	3.4	558.33	3	24.16	1370000	13	969217	F13:9203	No	FL1029_IPP114_PB_CB_vivax_8_even.raw	tr|A5KCD7|A5KCD7_PLAVS 60S ribosomal protein L30 putative OS=Plasmodium vivax (strain Salvador I) OX=126793 GN=PVX_001835 PE=4 SV=1			PEAKS DB
AKKTATDNKKAKKVGDKRKGR	21.35	2327.39	21	3.6	776.806	3	19.65	3070000	13	967611	F13:7471	No	FL1029_IPP114_PB_CB_vivax_8_even.raw	tr|A5KAB1|A5KAB1_PLAVS 60S ribosomal protein L34-A putative OS=Plasmodium vivax (strain Salvador I) OX=126793 GN=PVX_088065 PE=4 SV=1			PEAKS DB
AKLHWERAEPPGPYF	15.07	1796.9	15	2.3	450.233	4	39.8		30	931136	F30:14389	No	FL1189_IPP114_PB_CB_vivax_6_odd.raw	sp|P12111|CO6A3_HUMAN Collagen alpha-3(VI) chain OS=Homo sapiens OX=9606 GN=COL6A3 PE=1 SV=5			PEAKS DB
AKLTERRKNKQQQKKDLKRKSKDN	30.65	2967.72	24	1.8	742.938	4	23.2	3100000	14	883296	F14:8778	No	FL1029_IPP114_PB_CB_vivax_8_odd.raw	tr|A5JZN9|A5JZN9_PLAVS 60S ribosomal protein L13 putative OS=Plasmodium vivax (strain Salvador I) OX=126793 GN=PVX_123070 PE=3 SV=1			PEAKS DB
AKNKLEGLED	25.27	1115.58	10	-0.4	558.798	2	28.86	463000	1	840534	F1:10960	No	FL1029_IPP114_PB_CB_vivax_1_even.raw	sp|P04259|K2C6B_HUMAN Keratin type II cytoskeletal 6B OS=Homo sapiens OX=9606 GN=KRT6B PE=1 SV=5:sp|P48668|K2C6C_HUMAN Keratin type II cytoskeletal 6C OS=Homo sapiens OX=9606 GN=KRT6C PE=1 SV=3:sp|P02538|K2C6A_HUMAN Keratin type II cytoskeletal 6A OS=Homo sapiens OX=9606 GN=KRT6A PE=1 SV=3			PEAKS DB
AKNKLN(+.98)DLED	15.05	1159.57	10	-1	580.793	2	29.23	324000	1	840716	F1:11121	No	FL1029_IPP114_PB_CB_vivax_1_even.raw	sp|P04264|K2C1_HUMAN Keratin type II cytoskeletal 1 OS=Homo sapiens OX=9606 GN=KRT1 PE=1 SV=6	Deamidation (NQ)	N6:Deamidation (NQ):4.52	PEAKS PTM
AKNKLND(-18.01)LED	20.05	1140.58	10	1.8	571.297	2	29.02	237000	12	683379	F12:11068	No	FL1029_IPP114_PB_CB_vivax_7_odd.raw	sp|P04264|K2C1_HUMAN Keratin type II cytoskeletal 1 OS=Homo sapiens OX=9606 GN=KRT1 PE=1 SV=6	Dehydration	D7:Dehydration:13.38	PEAKS PTM
AKNKLNDLED	28.6	1158.59	10	0.8	580.302	2	27.63	363000	11	638017	F11:10501	No	FL1029_IPP114_PB_CB_vivax_7_even.raw	sp|P04264|K2C1_HUMAN Keratin type II cytoskeletal 1 OS=Homo sapiens OX=9606 GN=KRT1 PE=1 SV=6			PEAKS DB
AKPAPPKPEPKPKK	20.54	1511.92	14	1.5	504.981	3	21.29	502000	3	860183	F3:8031	No	FL1029_IPP114_PB_CB_vivax_2_even.raw	sp|P05204|HMGN2_HUMAN Non-histone chromosomal protein HMG-17 OS=Homo sapiens OX=9606 GN=HMGN2 PE=1 SV=3			PEAKS DB
AKPKAAKPKAAKPK	25.42	1432.92	14	0.1	478.649	3	19.78	1330000	14	882098	F14:7518	No	FL1029_IPP114_PB_CB_vivax_8_odd.raw	sp|P16401|H15_HUMAN Histone H1.5 OS=Homo sapiens OX=9606 GN=HIST1H1B PE=1 SV=3			PEAKS DB
AKPKAAKPKKAAAKKK	21.19	1663.1	16	0.7	555.374	3	19.64	945000	8	702390	F8:7482	No	FL1029_IPP114_PB_CB_vivax_4_odd.raw	sp|P10412|H14_HUMAN Histone H1.4 OS=Homo sapiens OX=9606 GN=HIST1H1E PE=1 SV=2			PEAKS DB
AKPKTAKPKAAKPK	18.73	1462.93	14	0.3	488.652	3	19.83		11	635264	F11:7510	No	FL1029_IPP114_PB_CB_vivax_7_even.raw	sp|P10412|H14_HUMAN Histone H1.4 OS=Homo sapiens OX=9606 GN=HIST1H1E PE=1 SV=2			PEAKS DB
AKPKVVKPKKAAPK	38.9	1488.99	14	-0.2	497.336	3	21.41	383000	14	882675	F14:8134	No	FL1029_IPP114_PB_CB_vivax_8_odd.raw	sp|P16403|H12_HUMAN Histone H1.2 OS=Homo sapiens OX=9606 GN=HIST1H1C PE=1 SV=2			PEAKS DB
AKPKVVKPKKAAPKK	32.14	1617.08	15	-0.3	405.278	4	20.97	1310000	14	882530	F14:7933	No	FL1029_IPP114_PB_CB_vivax_8_odd.raw	sp|P16403|H12_HUMAN Histone H1.2 OS=Homo sapiens OX=9606 GN=HIST1H1C PE=1 SV=2			PEAKS DB
AKPKVVKPKKAAPKKK	25.39	1745.18	16	0.9	437.302	4	20.76	785000	14	882461	F14:7922	No	FL1029_IPP114_PB_CB_vivax_8_odd.raw	sp|P16403|H12_HUMAN Histone H1.2 OS=Homo sapiens OX=9606 GN=HIST1H1C PE=1 SV=2			PEAKS DB
AKPVKASKPKKAKPVKPKA	37.6	2000.3	19	-1	501.081	4	20.8	1460000	13	968027	F13:7884	No	FL1029_IPP114_PB_CB_vivax_8_even.raw	sp|P07305|H10_HUMAN Histone H1.0 OS=Homo sapiens OX=9606 GN=H1F0 PE=1 SV=3			PEAKS DB
AKSKNHTNHNQNRKA	15.83	1746.9	15	0.7	583.307	3	19.57	1010000	14	882020	F14:7414	No	FL1029_IPP114_PB_CB_vivax_8_odd.raw	tr|A5K3F2|A5K3F2_PLAVS 60S ribosomal protein L29 OS=Plasmodium vivax (strain Salvador I) OX=126793 GN=PVX_117440 PE=3 SV=1			PEAKS DB
AKSKNHTNHNQNRKAHKN	41.91	2126.1	18	-2.5	709.704	3	19.57	1190000	14	882025	F14:7422	No	FL1029_IPP114_PB_CB_vivax_8_odd.raw	tr|A5K3F2|A5K3F2_PLAVS 60S ribosomal protein L29 OS=Plasmodium vivax (strain Salvador I) OX=126793 GN=PVX_117440 PE=3 SV=1			PEAKS DB
AKSKNHTNHNQNRKAHKNG	36.28	2183.12	19	0.9	728.714	3	19.58	343000	13	967580	F13:7423	No	FL1029_IPP114_PB_CB_vivax_8_even.raw	tr|A5K3F2|A5K3F2_PLAVS 60S ribosomal protein L29 OS=Plasmodium vivax (strain Salvador I) OX=126793 GN=PVX_117440 PE=3 SV=1			PEAKS DB
AKSKNHTNHNQNRKAHKNGIKKPK	18.13	2777.54	24	2	695.393	4	21.78	3810000	14	882815	F14:8809	No	FL1029_IPP114_PB_CB_vivax_8_odd.raw	tr|A5K3F2|A5K3F2_PLAVS 60S ribosomal protein L29 OS=Plasmodium vivax (strain Salvador I) OX=126793 GN=PVX_117440 PE=3 SV=1			PEAKS DB
AKTDQAQKAEGAGDAK	54.64	1587.79	16	2.5	530.27	3	20.66	3790000	14	882421	F14:7840	No	FL1029_IPP114_PB_CB_vivax_8_odd.raw	sp|P05204|HMGN2_HUMAN Non-histone chromosomal protein HMG-17 OS=Homo sapiens OX=9606 GN=HMGN2 PE=1 SV=3			PEAKS DB
AKVVKEVK	21.18	899.58	8	0.4	450.798	2	21.56	177000	3	860266	F3:8172	No	FL1029_IPP114_PB_CB_vivax_2_even.raw	tr|A5K6T4|A5K6T4_PLAVS 50S ribosomal protein L29 putative OS=Plasmodium vivax (strain Salvador I) OX=126793 GN=PVX_099510 PE=4 SV=1			PEAKS DB
ALDPEISSGEGLR	19.1	1342.67	13	-1.7	672.342	2	38.38	56500	11	641830	F11:14646	No	FL1029_IPP114_PB_CB_vivax_7_even.raw	sp|Q08554|DSC1_HUMAN Desmocollin-1 OS=Homo sapiens OX=9606 GN=DSC1 PE=1 SV=2			PEAKS DB
ALDVANKIGII	25.38	1125.68	11	2.7	563.847	2	47.15		2	757066	F2:18058	No	FL1029_IPP114_PB_CB_vivax_1_odd.raw	sp|P62750|RL23A_HUMAN 60S ribosomal protein L23a OS=Homo sapiens OX=9606 GN=RPL23A PE=1 SV=1			PEAKS DB
ALEEQ(+.98)LQQIRAE	29.06	1427.73	12	0.8	714.871	2	43.2	43300	10	666076	F10:16501	No	FL1029_IPP114_PB_CB_vivax_6_odd.raw	sp|P13645|K1C10_HUMAN Keratin type I cytoskeletal 10 OS=Homo sapiens OX=9606 GN=KRT10 PE=1 SV=6	Deamidation (NQ)	Q5:Deamidation (NQ):9.40	PEAKS PTM
ALEEQLQ(+.98)QIRAE	30.63	1427.73	12	-0.1	714.87	2	42.09		10	665683	F10:16062	No	FL1029_IPP114_PB_CB_vivax_6_odd.raw	sp|P13645|K1C10_HUMAN Keratin type I cytoskeletal 10 OS=Homo sapiens OX=9606 GN=KRT10 PE=1 SV=6	Deamidation (NQ)	Q7:Deamidation (NQ):17.01	PEAKS PTM
ALEEQLQQ(+.98)IRAE	29.42	1427.73	12	1.7	714.871	2	41.49		10	665486	F10:15831	No	FL1029_IPP114_PB_CB_vivax_6_odd.raw	sp|P13645|K1C10_HUMAN Keratin type I cytoskeletal 10 OS=Homo sapiens OX=9606 GN=KRT10 PE=1 SV=6	Deamidation (NQ)	Q8:Deamidation (NQ):17.01	PEAKS PTM
ALEEQLQQIR	29.93	1226.66	10	0.1	614.338	2	37.79	687000	10	664163	F10:14402	No	FL1029_IPP114_PB_CB_vivax_6_odd.raw	sp|P13645|K1C10_HUMAN Keratin type I cytoskeletal 10 OS=Homo sapiens OX=9606 GN=KRT10 PE=1 SV=6			PEAKS DB
ALEEQLQQIRAE	39.66	1426.74	12	1.2	714.379	2	40.43	614000	11	642583	F11:15406	No	FL1029_IPP114_PB_CB_vivax_7_even.raw	sp|P13645|K1C10_HUMAN Keratin type I cytoskeletal 10 OS=Homo sapiens OX=9606 GN=KRT10 PE=1 SV=6			PEAKS DB
ALEEQLQQIRAETE	33.07	1656.83	14	1.2	829.424	2	44.11	394000	10	666399	F10:16812	No	FL1029_IPP114_PB_CB_vivax_6_odd.raw	sp|P13645|K1C10_HUMAN Keratin type I cytoskeletal 10 OS=Homo sapiens OX=9606 GN=KRT10 PE=1 SV=6			PEAKS DB
ALENPPKPRKQSSKKTSKAKK	25.75	2350.38	21	1	784.468	3	20.63	909000	13	967951	F13:7827	No	FL1029_IPP114_PB_CB_vivax_8_even.raw	tr|A5KC18|A5KC18_PLAVS Uncharacterized protein OS=Plasmodium vivax (strain Salvador I) OX=126793 GN=PVX_096030 PE=4 SV=1			PEAKS DB
ALENPPKPRKQSSKKTSKAKKAAA	15.5	2563.49	24	3	855.507	3	21.75		13	968336	F13:8250	No	FL1029_IPP114_PB_CB_vivax_8_even.raw	tr|A5KC18|A5KC18_PLAVS Uncharacterized protein OS=Plasmodium vivax (strain Salvador I) OX=126793 GN=PVX_096030 PE=4 SV=1			PEAKS DB
ALEPDFKATSIT	18.06	1291.67	12	0.4	646.841	2	43.61	227000	31	997590	F31:15745	No	FL1189b_IPP114_PB_CB_vivax_6_even.raw	sp|Q14118|DAG1_HUMAN Dystroglycan OS=Homo sapiens OX=9606 GN=DAG1 PE=1 SV=2			PEAKS DB
ALFKEKKEKPRS	34.14	1459.85	12	0.3	487.625	3	23.2	1300000	13	968873	F13:8832	No	FL1029_IPP114_PB_CB_vivax_8_even.raw	tr|A5KB86|A5KB86_PLAVS 40S ribosomal protein S23 putative OS=Plasmodium vivax (strain Salvador I) OX=126793 GN=PVX_119470 PE=3 SV=1			PEAKS DB
ALGNEKEAH	17.48	967.472	9	-0.4	484.743	2	29.26		11	638597	F11:11122	No	FL1029_IPP114_PB_CB_vivax_7_even.raw	sp|Q8N3K9|CMYA5_HUMAN Cardiomyopathy-associated protein 5 OS=Homo sapiens OX=9606 GN=CMYA5 PE=1 SV=3			PEAKS DB
ALGRLLVVY	22.18	1002.62	9	-0.4	502.318	2	47.23	2170000	5	779599	F5:18085	No	FL1029_IPP114_PB_CB_vivax_3_even.raw	sp|P68871|HBB_HUMAN Hemoglobin subunit beta OS=Homo sapiens OX=9606 GN=HBB PE=1 SV=2:sp|P02042|HBD_HUMAN Hemoglobin subunit delta OS=Homo sapiens OX=9606 GN=HBD PE=1 SV=2:sp|P02100|HBE_HUMAN Hemoglobin subunit epsilon OS=Homo sapiens OX=9606 GN=HBE1 PE=1 SV=2			PEAKS DB
ALISNSHQL	19.86	981.524	9	1.8	491.77	2	33.98	427000	14	887134	F14:12964	No	FL1029_IPP114_PB_CB_vivax_8_odd.raw	sp|O75444|MAF_HUMAN Transcription factor Maf OS=Homo sapiens OX=9606 GN=MAF PE=1 SV=2			PEAKS DB
ALKDLINEA	21.35	985.544	9	-0.2	493.779	2	42.89	971000	6	953549	F6:16431	No	FL1029_IPP114_PB_CB_vivax_3_odd.raw	sp|P12004|PCNA_HUMAN Proliferating cell nuclear antigen OS=Homo sapiens OX=9606 GN=PCNA PE=1 SV=1			PEAKS DB
ALKKAIA	25.61	713.48	7	-0.7	357.747	2	24.14	487000	4	816331	F4:9188	No	FL1029_IPP114_PB_CB_vivax_2_odd.raw	sp|Q9NRG4|SMYD2_HUMAN N-lysine methyltransferase SMYD2 OS=Homo sapiens OX=9606 GN=SMYD2 PE=1 SV=2			PEAKS DB
ALKKALA	25.61	713.48	7	-0.7	357.747	2	24.14	487000	4	816331	F4:9188	No	FL1029_IPP114_PB_CB_vivax_2_odd.raw	sp|P10412|H14_HUMAN Histone H1.4 OS=Homo sapiens OX=9606 GN=HIST1H1E PE=1 SV=2:sp|P16401|H15_HUMAN Histone H1.5 OS=Homo sapiens OX=9606 GN=HIST1H1B PE=1 SV=3:sp|P16403|H12_HUMAN Histone H1.2 OS=Homo sapiens OX=9606 GN=HIST1H1C PE=1 SV=2:sp|P16402|H13_HUMAN Histone H1.3 OS=Homo sapiens OX=9606 GN=HIST1H1D PE=1 SV=2:sp|Q02539|H11_HUMAN Histone H1.1 OS=Homo sapiens OX=9606 GN=HIST1H1A PE=1 SV=3:sp|P…			PEAKS DB
ALKNPPINTK	18.51	1094.64	10	1.4	548.33	2	26.67	178000	9	727351	F9:10131	No	FL1029_IPP114_PB_CB_vivax_6_even.raw	sp|O15511|ARPC5_HUMAN Actin-related protein 2/3 complex subunit 5 OS=Homo sapiens OX=9606 GN=ARPC5 PE=1 SV=3			PEAKS DB
ALLGKFINV	23.35	973.596	9	1.2	487.806	2	48.07	516000	14	892146	F14:18398	No	FL1029_IPP114_PB_CB_vivax_8_odd.raw	sp|O75069|TMCC2_HUMAN Transmembrane and coiled-coil domains protein 2 OS=Homo sapiens OX=9606 GN=TMCC2 PE=1 SV=3			PEAKS DB
ALNELLQHV	30.27	1035.57	9	0.1	518.793	2	45.69	776000	14	891294	F14:17477	No	FL1029_IPP114_PB_CB_vivax_8_odd.raw	sp|Q9Y490|TLN1_HUMAN Talin-1 OS=Homo sapiens OX=9606 GN=TLN1 PE=1 SV=3			PEAKS DB
ALPATPQLP	15.21	906.518	9	-3.3	454.264	2	33.93		6	950430	F6:12991	No	FL1029_IPP114_PB_CB_vivax_3_odd.raw	sp|O43516|WIPF1_HUMAN WAS/WASL-interacting protein family member 1 OS=Homo sapiens OX=9606 GN=WIPF1 PE=1 SV=3			PEAKS DB
ALQLLTRLVLSLQPIPLK	21.32	2015.29	18	-0.9	1008.65	2	36.35		11	641126	F11:13854	No	FL1029_IPP114_PB_CB_vivax_7_even.raw	sp|Q01831|XPC_HUMAN DNA repair protein complementing XP-C cells OS=Homo sapiens OX=9606 GN=XPC PE=1 SV=4			PEAKS DB
ALQQAKED	23.32	901.451	8	-0.2	451.732	2	22.04	177000	11	636060	F11:8353	No	FL1029_IPP114_PB_CB_vivax_7_even.raw	sp|P04264|K2C1_HUMAN Keratin type II cytoskeletal 1 OS=Homo sapiens OX=9606 GN=KRT1 PE=1 SV=6:sp|P35908|K22E_HUMAN Keratin type II cytoskeletal 2 epidermal OS=Homo sapiens OX=9606 GN=KRT2 PE=1 SV=2			PEAKS DB
ALSDHHIYL	23.56	1067.54	9	1.7	534.778	2	36.16	536000	13	973489	F13:13817	No	FL1029_IPP114_PB_CB_vivax_8_even.raw	sp|P04075|ALDOA_HUMAN Fructose-bisphosphate aldolase A OS=Homo sapiens OX=9606 GN=ALDOA PE=1 SV=2			PEAKS DB
ALSNLEVKL	28.33	985.581	9	-0.1	493.798	2	43.4	919000	14	890493	F14:16573	No	FL1029_IPP114_PB_CB_vivax_8_odd.raw	sp|Q86UX7|URP2_HUMAN Fermitin family homolog 3 OS=Homo sapiens OX=9606 GN=FERMT3 PE=1 SV=1			PEAKS DB
ALTHRIT	15.63	810.471	7	1.8	406.244	2	30.04		12	683708	F12:11462	No	FL1029_IPP114_PB_CB_vivax_7_odd.raw	sp|P60852|ZP1_HUMAN Zona pellucida sperm-binding protein 1 OS=Homo sapiens OX=9606 GN=ZP1 PE=1 SV=1			PEAKS DB
ALTNAVAHV	38.41	894.492	9	1.4	448.254	2	34.18	6440000	14	887205	F14:13016	No	FL1029_IPP114_PB_CB_vivax_8_odd.raw	sp|P69905|HBA_HUMAN Hemoglobin subunit alpha OS=Homo sapiens OX=9606 GN=HBA1 PE=1 SV=2			PEAKS DB
ALTNGIYPH	24.61	984.503	9	1	493.259	2	36.39	270000	14	887991	F14:13905	No	FL1029_IPP114_PB_CB_vivax_8_odd.raw	sp|Q02878|RL6_HUMAN 60S ribosomal protein L6 OS=Homo sapiens OX=9606 GN=RPL6 PE=1 SV=3			PEAKS DB
ALTNGIYPHK	27.93	1112.6	10	-1.7	371.873	3	30.82		14	886006	F14:11742	No	FL1029_IPP114_PB_CB_vivax_8_odd.raw	sp|Q02878|RL6_HUMAN 60S ribosomal protein L6 OS=Homo sapiens OX=9606 GN=RPL6 PE=1 SV=3			PEAKS DB
ALTVPELTQQVFDAK	24.97	1658.89	15	0.4	830.452	2	50.12	257000	14	892851	F14:19176	No	FL1029_IPP114_PB_CB_vivax_8_odd.raw	sp|P07437|TBB5_HUMAN Tubulin beta chain OS=Homo sapiens OX=9606 GN=TUBB PE=1 SV=2			PEAKS DB
AM(+15.99)GIM(+15.99)NSFVNDIFER	47.31	1774.8	15	0.6	888.409	2	49.65	3960000	14	892702	F14:18979	No	FL1029_IPP114_PB_CB_vivax_8_odd.raw	sp|P62807|H2B1C_HUMAN Histone H2B type 1-C/E/F/G/I OS=Homo sapiens OX=9606 GN=HIST1H2BC PE=1 SV=4:sp|O60814|H2B1K_HUMAN Histone H2B type 1-K OS=Homo sapiens OX=9606 GN=HIST1H2BK PE=1 SV=3:sp|P57053|H2BFS_HUMAN Histone H2B type F-S OS=Homo sapiens OX=9606 GN=H2BFS PE=1 SV=2:sp|Q16778|H2B2E_HUMAN Histone H2B type 2-E OS=Homo sapiens OX=9606 GN=HIST2H2BE PE=1 SV=3:sp|P06899|H2B1J_HUMAN Histone H2B t…	Oxidation (M)	M2:Oxidation (M):1000.00;M5:Oxidation (M):1000.00	PEAKS PTM
AMGIMNSFVNDIFER	20.79	1742.81	15	-0.9	872.413	2	50.22		31	999760	F31:18093	No	FL1189b_IPP114_PB_CB_vivax_6_even.raw	sp|P62807|H2B1C_HUMAN Histone H2B type 1-C/E/F/G/I OS=Homo sapiens OX=9606 GN=HIST1H2BC PE=1 SV=4:sp|O60814|H2B1K_HUMAN Histone H2B type 1-K OS=Homo sapiens OX=9606 GN=HIST1H2BK PE=1 SV=3:sp|P57053|H2BFS_HUMAN Histone H2B type F-S OS=Homo sapiens OX=9606 GN=H2BFS PE=1 SV=2:sp|Q16778|H2B2E_HUMAN Histone H2B type 2-E OS=Homo sapiens OX=9606 GN=HIST2H2BE PE=1 SV=3:sp|P06899|H2B1J_HUMAN Histone H2B t…			PEAKS DB
ANALAHK	17.23	723.403	7	-0.8	362.708	2	20.95	69000	12	680496	F12:7972	No	FL1029_IPP114_PB_CB_vivax_7_odd.raw	sp|P68871|HBB_HUMAN Hemoglobin subunit beta OS=Homo sapiens OX=9606 GN=HBB PE=1 SV=2:sp|P02042|HBD_HUMAN Hemoglobin subunit delta OS=Homo sapiens OX=9606 GN=HBD PE=1 SV=2			PEAKS DB
ANALAHKYH	15.15	1023.52	9	-0.3	512.77	2	23.45	142000	12	681460	F12:8941	No	FL1029_IPP114_PB_CB_vivax_7_odd.raw	sp|P68871|HBB_HUMAN Hemoglobin subunit beta OS=Homo sapiens OX=9606 GN=HBB PE=1 SV=2:sp|P02042|HBD_HUMAN Hemoglobin subunit delta OS=Homo sapiens OX=9606 GN=HBD PE=1 SV=2			PEAKS DB
ANIQADYLYR	17.13	1225.61	10	1.1	613.812	2	38.28	79000	11	641795	F11:14603	No	FL1029_IPP114_PB_CB_vivax_7_even.raw	sp|O00217|NDUS8_HUMAN NADH dehydrogenase [ubiquinone] iron-sulfur protein 8 mitochondrial OS=Homo sapiens OX=9606 GN=NDUFS8 PE=1 SV=1			PEAKS DB
ANKALLPTAGDD	21.56	1184.6	12	1.1	593.31	2	36.23	137000	32	1015542	F32:13111	No	FL1189b_IPP114_PB_CB_vivax_6_odd.raw	tr|A5KAZ9|A5KAZ9_PLAVS 60S ribosomal subunit protein L4/L1 putative OS=Plasmodium vivax (strain Salvador I) OX=126793 GN=PVX_097915 PE=4 SV=1			PEAKS DB
APAAPETTPETPETPQES	22.16	1851.84	18	0.4	926.926	2	36.78		14	888126	F14:14042	No	FL1029_IPP114_PB_CB_vivax_8_odd.raw	tr|A5KC26|A5KC26_PLAVS Early transcribed membrane protein (ETRAMP) OS=Plasmodium vivax (strain Salvador I) OX=126793 GN=PVX_096070 PE=4 SV=1			PEAKS DB
APALLASPAGSAGGAVSEL	16.31	1637.86	19	1.7	819.94	2	48.21	135000	32	1019480	F32:17419	No	FL1189b_IPP114_PB_CB_vivax_6_odd.raw	sp|Q9Y5I2|PCDAA_HUMAN Protocadherin alpha-10 OS=Homo sapiens OX=9606 GN=PCDHA10 PE=2 SV=1			PEAKS DB
APARAGH	17.65	678.356	7	-4.6	340.184	2	21.79	1720000	4	815503	F4:8291	No	FL1029_IPP114_PB_CB_vivax_2_odd.raw	sp|Q8IX30|SCUB3_HUMAN Signal peptide CUB and EGF-like domain-containing protein 3 OS=Homo sapiens OX=9606 GN=SCUBE3 PE=1 SV=1:sp|Q9BTP6|ZBED2_HUMAN Zinc finger BED domain-containing protein 2 OS=Homo sapiens OX=9606 GN=ZBED2 PE=1 SV=2			PEAKS DB
APARTIY	15.91	790.434	7	-4.4	396.222	2	30.55		5	773879	F5:11633	No	FL1029_IPP114_PB_CB_vivax_3_even.raw	sp|Q9NTI2|AT8A2_HUMAN Phospholipid-transporting ATPase IB OS=Homo sapiens OX=9606 GN=ATP8A2 PE=1 SV=3			PEAKS DB
APCGGAVHNATI	17.3	1109.53	12	-2.3	555.77	2	41.55		11	642972	F11:15856	No	FL1029_IPP114_PB_CB_vivax_7_even.raw	sp|Q9BYH1|SE6L1_HUMAN Seizure 6-like protein OS=Homo sapiens OX=9606 GN=SEZ6L PE=1 SV=1			PEAKS DB
APEEHPVLL	45.97	1003.53	9	1	1004.54	1	38.35	715000	7	798971	F7:14665	No	FL1029_IPP114_PB_CB_vivax_4_even.raw	sp|P63261|ACTG_HUMAN Actin cytoplasmic 2 OS=Homo sapiens OX=9606 GN=ACTG1 PE=1 SV=1:sp|P60709|ACTB_HUMAN Actin cytoplasmic 1 OS=Homo sapiens OX=9606 GN=ACTB PE=1 SV=1:sp|A5A3E0|POTEF_HUMAN POTE ankyrin domain family member F OS=Homo sapiens OX=9606 GN=POTEF PE=1 SV=2:tr|A5K8W3|A5K8W3_PLAVS Actin OS=Plasmodium vivax (strain Salvador I) OX=126793 GN=PVX_101200 PE=3 SV=1			PEAKS DB
APGDK(+87.03)GESGPSGPAGPT	15.53	1567.71	17	0.3	784.863	2	27.92	123000	32	1012787	F32:10102	No	FL1189b_IPP114_PB_CB_vivax_6_odd.raw	sp|P02452|CO1A1_HUMAN Collagen alpha-1(I) chain OS=Homo sapiens OX=9606 GN=COL1A1 PE=1 SV=5	Glycidamide adduct	K5:Glycidamide adduct:0.00	PEAKS PTM
APGRHPQ	16.29	761.393	7	3.3	381.705	2	35.26		14	887594	F14:13461	No	FL1029_IPP114_PB_CB_vivax_8_odd.raw	sp|Q8IWN7|RP1L1_HUMAN Retinitis pigmentosa 1-like 1 protein OS=Homo sapiens OX=9606 GN=RP1L1 PE=1 SV=5			PEAKS DB
APISAGIKKPHR	40.59	1273.76	12	-0.5	425.594	3	25	492000	13	969503	F13:9515	No	FL1029_IPP114_PB_CB_vivax_8_even.raw	tr|A5K1U7|A5K1U7_PLAVS Histone H3 OS=Plasmodium vivax (strain Salvador I) OX=126793 GN=PVX_113665 PE=3 SV=1			PEAKS DB
APKKKAAQKKPAAPETSA	16.01	1821.05	18	1.2	608.024	3	21.04	295000	14	882552	F14:7991	No	FL1029_IPP114_PB_CB_vivax_8_odd.raw	tr|A5KC18|A5KC18_PLAVS Uncharacterized protein OS=Plasmodium vivax (strain Salvador I) OX=126793 GN=PVX_096030 PE=4 SV=1			PEAKS DB
APKKPAAPKKPAAPKKPAAPK(+71.04)KAAA	30.67	2503.55	25	-1.5	626.893	4	24.06	1930000	13	969175	F13:9140	No	FL1029_IPP114_PB_CB_vivax_8_even.raw	tr|A5KB38|A5KB38_PLAVS PRESAN domain-containing protein OS=Plasmodium vivax (strain Salvador I) OX=126793 GN=PVX_119225 PE=4 SV=1	Propionamide (K X@N-term)	K21:Propionamide (K X@N-term):0.00	PEAKS PTM
APKKPAAPKKPAAPKKPAAPKK	24.2	2219.4	22	3.2	555.859	4	23.26		13	968892	F13:8842	No	FL1029_IPP114_PB_CB_vivax_8_even.raw	tr|A5KB38|A5KB38_PLAVS PRESAN domain-containing protein OS=Plasmodium vivax (strain Salvador I) OX=126793 GN=PVX_119225 PE=4 SV=1			PEAKS DB
APKKPAAPKKPAAPKKPAAPKK(+71.04)AAA	35.13	2503.55	25	3.4	835.526	3	24.06	1330000	13	969178	F13:9147	No	FL1029_IPP114_PB_CB_vivax_8_even.raw	tr|A5KB38|A5KB38_PLAVS PRESAN domain-containing protein OS=Plasmodium vivax (strain Salvador I) OX=126793 GN=PVX_119225 PE=4 SV=1	Propionamide (K X@N-term)	K22:Propionamide (K X@N-term):9.34	PEAKS PTM
APPPPPPPP	22.4	865.47	9	0.5	433.742	2	33.89		14	887098	F14:12930	No	FL1029_IPP114_PB_CB_vivax_8_odd.raw	sp|Q9ULL5|PRR12_HUMAN Proline-rich protein 12 OS=Homo sapiens OX=9606 GN=PRR12 PE=1 SV=3:sp|Q9C0D6|FHDC1_HUMAN FH2 domain-containing protein 1 OS=Homo sapiens OX=9606 GN=FHDC1 PE=1 SV=2:sp|Q96Q04|LMTK3_HUMAN Serine/threonine-protein kinase LMTK3 OS=Homo sapiens OX=9606 GN=LMTK3 PE=1 SV=2:sp|Q96EV2|RBM33_HUMAN RNA-binding protein 33 OS=Homo sapiens OX=9606 GN=RBM33 PE=1 SV=3:sp|Q9Y4A5|TRRAP_HUMAN …			PEAKS DB
APSPGYN	17.33	704.313	7	2.3	353.165	2	32	348000	7	796834	F7:12187	No	FL1029_IPP114_PB_CB_vivax_4_even.raw	sp|P78411|IRX5_HUMAN Iroquois-class homeodomain protein IRX-5 OS=Homo sapiens OX=9606 GN=IRX5 PE=1 SV=3			PEAKS DB
APSTYAHLSPAKTPPPP	15.57	1730.9	17	-1.5	577.973	3	34.16	283000	30	929280	F30:12350	No	FL1189_IPP114_PB_CB_vivax_6_odd.raw	sp|Q86X29|LSR_HUMAN Lipolysis-stimulated lipoprotein receptor OS=Homo sapiens OX=9606 GN=LSR PE=1 SV=4			PEAKS DB
AQAAAPASVPAQAPKRTQAPTKASE	26.52	2446.29	25	2	816.44	3	27.9	918000	11	638109	F11:10577	No	FL1029_IPP114_PB_CB_vivax_7_even.raw	sp|P47914|RL29_HUMAN 60S ribosomal protein L29 OS=Homo sapiens OX=9606 GN=RPL29 PE=1 SV=2			PEAKS DB
AQK(+14.02)EN(+.98)AGEDPGLA	16.96	1313.61	13	1.7	657.813	2	28.33	195000	8	705503	F8:10764	No	FL1029_IPP114_PB_CB_vivax_4_odd.raw	sp|P81605|DCD_HUMAN Dermcidin OS=Homo sapiens OX=9606 GN=DCD PE=1 SV=2	Methylation(KR); Deamidation (NQ)	K3:Methylation(KR):1000.00;N5:Deamidation (NQ):0.00	PEAKS PTM
AQKIKKKKKLTPA	31.47	1480.98	13	-1.1	494.667	3	20.6	584000	32	1010400	F32:7402	No	FL1189b_IPP114_PB_CB_vivax_6_odd.raw	tr|A5K197|A5K197_PLAVS Sperm-specific protein Don juan putative OS=Plasmodium vivax (strain Salvador I) OX=126793 GN=PVX_085790 PE=4 SV=1			PEAKS DB
AQKIKKKKKLTPAKV	17.65	1708.14	15	0.3	428.044	4	27.26	480000	7	794929	F7:10791	No	FL1029_IPP114_PB_CB_vivax_4_even.raw	tr|A5K197|A5K197_PLAVS Sperm-specific protein Don juan putative OS=Plasmodium vivax (strain Salvador I) OX=126793 GN=PVX_085790 PE=4 SV=1			PEAKS DB
AQKKPAAPETSA	40	1197.64	12	0.9	599.825	2	23.2	249000	14	883287	F14:8821	No	FL1029_IPP114_PB_CB_vivax_8_odd.raw	tr|A5KC18|A5KC18_PLAVS Uncharacterized protein OS=Plasmodium vivax (strain Salvador I) OX=126793 GN=PVX_096030 PE=4 SV=1			PEAKS DB
AQKVLVTVPLALLQKG	19.11	1677.06	16	3.2	839.538	2	37.4		12	686301	F12:14301	No	FL1029_IPP114_PB_CB_vivax_7_odd.raw	sp|Q8NB78|KDM1B_HUMAN Lysine-specific histone demethylase 1B OS=Homo sapiens OX=9606 GN=KDM1B PE=1 SV=3			PEAKS DB
AQLAVAVDPSDPRAVQ	27.12	1635.86	16	0.1	818.936	2	41.88	155000	32	1017395	F32:15147	No	FL1189b_IPP114_PB_CB_vivax_6_odd.raw	sp|Q8N490|PNKD_HUMAN Probable hydrolase PNKD OS=Homo sapiens OX=9606 GN=PNKD PE=1 SV=2			PEAKS DB
AQNVGTTHDL	18.8	1054.5	10	-0.9	528.259	2	29.97	321000	32	1013452	F32:10838	No	FL1189b_IPP114_PB_CB_vivax_6_odd.raw	sp|Q13867|BLMH_HUMAN Bleomycin hydrolase OS=Homo sapiens OX=9606 GN=BLMH PE=1 SV=1			PEAKS DB
AQNVGTTHDLL	28.16	1167.59	11	1	584.802	2	35.72	399000	12	685718	F12:13648	No	FL1029_IPP114_PB_CB_vivax_7_odd.raw	sp|Q13867|BLMH_HUMAN Bleomycin hydrolase OS=Homo sapiens OX=9606 GN=BLMH PE=1 SV=1			PEAKS DB
AQNVGTTHDLLD	30.64	1282.62	12	0.6	642.315	2	35.66	471000	12	685700	F12:13634	No	FL1029_IPP114_PB_CB_vivax_7_odd.raw	sp|Q13867|BLMH_HUMAN Bleomycin hydrolase OS=Homo sapiens OX=9606 GN=BLMH PE=1 SV=1			PEAKS DB
AQSKRGILT	18.51	972.572	9	-0.2	487.293	2	25.65	385000	7	794346	F7:9731	No	FL1029_IPP114_PB_CB_vivax_4_even.raw	sp|P63261|ACTG_HUMAN Actin cytoplasmic 2 OS=Homo sapiens OX=9606 GN=ACTG1 PE=1 SV=1:sp|P60709|ACTB_HUMAN Actin cytoplasmic 1 OS=Homo sapiens OX=9606 GN=ACTB PE=1 SV=1:sp|A5A3E0|POTEF_HUMAN POTE ankyrin domain family member F OS=Homo sapiens OX=9606 GN=POTEF PE=1 SV=2:sp|Q6S8J3|POTEE_HUMAN POTE ankyrin domain family member E OS=Homo sapiens OX=9606 GN=POTEE PE=2 SV=3:sp|P68032|ACTC_HUMAN Actin alp…			PEAKS DB
AQVIILNHPGQISAG	20.9	1516.84	15	2.5	759.427	2	40.61	57800	5	777243	F5:15548	No	FL1029_IPP114_PB_CB_vivax_3_even.raw	sp|P68104|EF1A1_HUMAN Elongation factor 1-alpha 1 OS=Homo sapiens OX=9606 GN=EEF1A1 PE=1 SV=1:sp|Q5VTE0|EF1A3_HUMAN Putative elongation factor 1-alpha-like 3 OS=Homo sapiens OX=9606 GN=EEF1A1P5 PE=5 SV=1			PEAKS DB
AQVKGHGKKV	18.59	1050.63	10	0.8	351.217	3	19.32	371000	30	924431	F30:6992	No	FL1189_IPP114_PB_CB_vivax_6_odd.raw	sp|P69905|HBA_HUMAN Hemoglobin subunit alpha OS=Homo sapiens OX=9606 GN=HBA1 PE=1 SV=2			PEAKS DB
AQYEDIAQK	15.32	1064.51	9	-3.2	533.263	2	29.58	163000	11	638717	F11:11250	No	FL1029_IPP114_PB_CB_vivax_7_even.raw	sp|P04264|K2C1_HUMAN Keratin type II cytoskeletal 1 OS=Homo sapiens OX=9606 GN=KRT1 PE=1 SV=6			PEAKS DB
AQYEDIAQKS	19.61	1151.55	10	1.9	576.781	2	29.91		10	661478	F10:11399	No	FL1029_IPP114_PB_CB_vivax_6_odd.raw	sp|P04264|K2C1_HUMAN Keratin type II cytoskeletal 1 OS=Homo sapiens OX=9606 GN=KRT1 PE=1 SV=6			PEAKS DB
AQYEDIAQKSKAEAE	16.13	1679.8	15	0.3	560.941	3	30.04	182000	10	661527	F10:11442	No	FL1029_IPP114_PB_CB_vivax_6_odd.raw	sp|P04264|K2C1_HUMAN Keratin type II cytoskeletal 1 OS=Homo sapiens OX=9606 GN=KRT1 PE=1 SV=6			PEAKS DB
AQYEEIANR(+14.02)S	20.02	1193.57	10	2.9	597.793	2	30.58	179000	10	661729	F10:11660	No	FL1029_IPP114_PB_CB_vivax_6_odd.raw	sp|P13647|K2C5_HUMAN Keratin type II cytoskeletal 5 OS=Homo sapiens OX=9606 GN=KRT5 PE=1 SV=3	Methylation(KR)	R9:Methylation(KR):1000.00	PEAKS PTM
AQYEEIAQR	25.05	1106.54	9	0.5	554.275	2	30.21	493000	10	661607	F10:11516	No	FL1029_IPP114_PB_CB_vivax_6_odd.raw	sp|P35908|K22E_HUMAN Keratin type II cytoskeletal 2 epidermal OS=Homo sapiens OX=9606 GN=KRT2 PE=1 SV=2:sp|P04259|K2C6B_HUMAN Keratin type II cytoskeletal 6B OS=Homo sapiens OX=9606 GN=KRT6B PE=1 SV=5:sp|P48668|K2C6C_HUMAN Keratin type II cytoskeletal 6C OS=Homo sapiens OX=9606 GN=KRT6C PE=1 SV=3:sp|P02538|K2C6A_HUMAN Keratin type II cytoskeletal 6A OS=Homo sapiens OX=9606 GN=KRT6A PE=1 SV=3:sp|P…			PEAKS DB
AQYEEIAQRS	28.87	1193.57	10	1.8	597.792	2	30.6	332000	7	796302	F7:11644	No	FL1029_IPP114_PB_CB_vivax_4_even.raw	sp|P35908|K22E_HUMAN Keratin type II cytoskeletal 2 epidermal OS=Homo sapiens OX=9606 GN=KRT2 PE=1 SV=2:sp|P04259|K2C6B_HUMAN Keratin type II cytoskeletal 6B OS=Homo sapiens OX=9606 GN=KRT6B PE=1 SV=5:sp|P48668|K2C6C_HUMAN Keratin type II cytoskeletal 6C OS=Homo sapiens OX=9606 GN=KRT6C PE=1 SV=3:sp|P02538|K2C6A_HUMAN Keratin type II cytoskeletal 6A OS=Homo sapiens OX=9606 GN=KRT6A PE=1 SV=3:sp|P…			PEAKS DB
AQYEHDLEV	25.85	1102.49	9	-0.1	552.254	2	36.05	224000	14	887872	F14:13750	No	FL1029_IPP114_PB_CB_vivax_8_odd.raw	sp|P62826|RAN_HUMAN GTP-binding nuclear protein Ran OS=Homo sapiens OX=9606 GN=RAN PE=1 SV=3			PEAKS DB
AR(+14.02)TKQTARKSTAGKAP	16.33	1684.97	16	-0.3	422.25	4	20.05	1240000	14	882199	F14:7612	No	FL1029_IPP114_PB_CB_vivax_8_odd.raw	tr|A5K1U7|A5K1U7_PLAVS Histone H3 OS=Plasmodium vivax (strain Salvador I) OX=126793 GN=PVX_113665 PE=3 SV=1	Methylation(KR)	R2:Methylation(KR):9.40	PEAKS PTM
AREGNHKPID	15.43	1135.57	10	1.1	568.795	2	21.36	186000	11	635810	F11:8090	No	FL1029_IPP114_PB_CB_vivax_7_even.raw	sp|P05089|ARGI1_HUMAN Arginase-1 OS=Homo sapiens OX=9606 GN=ARG1 PE=1 SV=2			PEAKS DB
AREIFDSRGNPTVEVD	19.92	1803.88	16	0.5	602.299	3	37.11	695000	11	641391	F11:14122	No	FL1029_IPP114_PB_CB_vivax_7_even.raw	sp|P06733|ENOA_HUMAN Alpha-enolase OS=Homo sapiens OX=9606 GN=ENO1 PE=1 SV=2			PEAKS DB
ARKKPATPKKQATPK	22.82	1649.01	15	1.8	825.514	2	20.18	624000	8	702603	F8:7677	No	FL1029_IPP114_PB_CB_vivax_4_odd.raw	tr|A5KC18|A5KC18_PLAVS Uncharacterized protein OS=Plasmodium vivax (strain Salvador I) OX=126793 GN=PVX_096030 PE=4 SV=1			PEAKS DB
ARTKQTARKSTAGKAPRKQLA	17.33	2267.33	21	-0.2	567.84	4	21.52		13	968268	F13:8161	No	FL1029_IPP114_PB_CB_vivax_8_even.raw	tr|A5K1U7|A5K1U7_PLAVS Histone H3 OS=Plasmodium vivax (strain Salvador I) OX=126793 GN=PVX_113665 PE=3 SV=1			PEAKS DB
ARTLAKAARAQAKVA	15.06	1524.92	15	-0.1	509.314	3	22.24	1610000	12	681006	F12:8561	No	FL1029_IPP114_PB_CB_vivax_7_odd.raw	sp|Q8IV32|CCD71_HUMAN Coiled-coil domain-containing protein 71 OS=Homo sapiens OX=9606 GN=CCDC71 PE=1 SV=3			PEAKS DB
ASAAPPP	16.25	609.312	7	0.2	305.663	2	20.84		5	770220	F5:7887	No	FL1029_IPP114_PB_CB_vivax_3_even.raw	sp|Q5EBL2|ZN628_HUMAN Zinc finger protein 628 OS=Homo sapiens OX=9606 GN=ZNF628 PE=1 SV=3:sp|Q96IZ0|PAWR_HUMAN PRKC apoptosis WT1 regulator protein OS=Homo sapiens OX=9606 GN=PAWR PE=1 SV=1:sp|Q9HAP2|MLXIP_HUMAN MLX-interacting protein OS=Homo sapiens OX=9606 GN=MLXIP PE=1 SV=2			PEAKS DB
ASDPILYRPVA	15.11	1200.65	11	1.6	601.333	2	40.22	57200	11	642517	F11:15369	No	FL1029_IPP114_PB_CB_vivax_7_even.raw	sp|P14618|KPYM_HUMAN Pyruvate kinase PKM OS=Homo sapiens OX=9606 GN=PKM PE=1 SV=4			PEAKS DB
ASGGVLPNIHNV	25.89	1176.63	12	1.4	589.321	2	39.78		13	974780	F13:15228	No	FL1029_IPP114_PB_CB_vivax_8_even.raw	tr|A5K214|A5K214_PLAVS Histone H2A OS=Plasmodium vivax (strain Salvador I) OX=126793 GN=PVX_114015 PE=3 SV=1			PEAKS DB
ASGNDKLGKKK	16.92	1144.66	11	-0.3	573.335	2	40.53		13	975052	F13:15517	No	FL1029_IPP114_PB_CB_vivax_8_even.raw	tr|A5K303|A5K303_PLAVS 60S ribosomal protein L23a putative OS=Plasmodium vivax (strain Salvador I) OX=126793 GN=PVX_116700 PE=3 SV=1			PEAKS DB
ASGSGGGYGGGSGKSSH	49.41	1408.6	17	2.1	705.307	2	20.11	261000	11	635362	F11:7629	No	FL1029_IPP114_PB_CB_vivax_7_even.raw	sp|P35527|K1C9_HUMAN Keratin type I cytoskeletal 9 OS=Homo sapiens OX=9606 GN=KRT9 PE=1 SV=3			PEAKS DB
ASGSGGGYGGGSGKSSHS	33.37	1495.63	18	-0.2	499.55	3	20.18	709000	11	635384	F11:7644	No	FL1029_IPP114_PB_CB_vivax_7_even.raw	sp|P35527|K1C9_HUMAN Keratin type I cytoskeletal 9 OS=Homo sapiens OX=9606 GN=KRT9 PE=1 SV=3			PEAKS DB
ASKTFTTQETITNAE	35.86	1640.79	15	-1.2	821.401	2	35.47	328000	32	1015286	F32:12824	No	FL1189b_IPP114_PB_CB_vivax_6_odd.raw	sp|P06744|G6PI_HUMAN Glucose-6-phosphate isomerase OS=Homo sapiens OX=9606 GN=GPI PE=1 SV=4			PEAKS DB
ASKTFTTQETITNAET	44.92	1741.84	16	-0.2	871.926	2	35.87	2720000	32	1015421	F32:12967	No	FL1189b_IPP114_PB_CB_vivax_6_odd.raw	sp|P06744|G6PI_HUMAN Glucose-6-phosphate isomerase OS=Homo sapiens OX=9606 GN=GPI PE=1 SV=4			PEAKS DB
ASKTFTTQETITNAETA	44.1	1812.87	17	-0.1	907.444	2	36.89	1760000	32	1015764	F32:13339	No	FL1189b_IPP114_PB_CB_vivax_6_odd.raw	sp|P06744|G6PI_HUMAN Glucose-6-phosphate isomerase OS=Homo sapiens OX=9606 GN=GPI PE=1 SV=4			PEAKS DB
ASSEAQKL	23.45	832.429	8	-0.1	417.222	2	25.71	353000	14	884197	F14:9790	No	FL1029_IPP114_PB_CB_vivax_8_odd.raw	tr|A5K0Q2|A5K0Q2_PLAVS Mitochondrial glycoprotein domain containing protein OS=Plasmodium vivax (strain Salvador I) OX=126793 GN=PVX_084795 PE=4 SV=1			PEAKS DB
ASYEFVQRL	24.76	1111.57	9	0.5	556.791	2	42.13	177000	12	687997	F12:16110	No	FL1029_IPP114_PB_CB_vivax_7_odd.raw	sp|Q14204|DYHC1_HUMAN Cytoplasmic dynein 1 heavy chain 1 OS=Homo sapiens OX=9606 GN=DYNC1H1 PE=1 SV=5			PEAKS DB
ATEAATNMNA	17	992.423	10	-2.9	993.428	1	33.44	845000	7	797314	F7:12760	No	FL1029_IPP114_PB_CB_vivax_4_even.raw	tr|A5KA75|A5KA75_PLAVS Rhoptry associated membrane antigen putative OS=Plasmodium vivax (strain Salvador I) OX=126793 GN=PVX_087885 PE=4 SV=1			PEAKS DB
ATGAATPK(+14.02)KSAKKTPKKA	24.69	1797.08	18	0.6	600.035	3	19.84	393000	4	814782	F4:7548	No	FL1029_IPP114_PB_CB_vivax_2_odd.raw	sp|P10412|H14_HUMAN Histone H1.4 OS=Homo sapiens OX=9606 GN=HIST1H1E PE=1 SV=2	Methylation(KR)	K8:Methylation(KR):0.00	PEAKS PTM
ATGGVKKPHRYRPGTVALR	15.54	2063.19	19	-3.9	516.802	4	29.52		3	863133	F3:11222	No	FL1029_IPP114_PB_CB_vivax_2_even.raw	sp|Q16695|H31T_HUMAN Histone H3.1t OS=Homo sapiens OX=9606 GN=HIST3H3 PE=1 SV=3:sp|Q71DI3|H32_HUMAN Histone H3.2 OS=Homo sapiens OX=9606 GN=HIST2H3A PE=1 SV=3:sp|P68431|H31_HUMAN Histone H3.1 OS=Homo sapiens OX=9606 GN=HIST1H3A PE=1 SV=2			PEAKS DB
ATPFLVVRHQLLKT	17.76	1621.97	14	-0.4	541.663	3	40.61	219000	30	931404	F30:14675	No	FL1189_IPP114_PB_CB_vivax_6_odd.raw	sp|P15954|COX7C_HUMAN Cytochrome c oxidase subunit 7C mitochondrial OS=Homo sapiens OX=9606 GN=COX7C PE=1 SV=1			PEAKS DB
ATRFKKNRKKRG	36.35	1488.91	12	-2.4	373.234	4	20.05	1240000	13	967740	F13:7604	No	FL1029_IPP114_PB_CB_vivax_8_even.raw	tr|A5K219|A5K219_PLAVS 60S ribosomal protein L27a putative OS=Plasmodium vivax (strain Salvador I) OX=126793 GN=PVX_114040 PE=3 SV=1			PEAKS DB
ATYGKPVHH	23.41	1008.51	9	0.3	505.264	2	21.37	160000	10	658305	F10:8114	No	FL1029_IPP114_PB_CB_vivax_6_odd.raw	sp|P61313|RL15_HUMAN 60S ribosomal protein L15 OS=Homo sapiens OX=9606 GN=RPL15 PE=1 SV=2			PEAKS DB
AVASFPKKQE	17.06	1103.6	10	0.4	552.806	2	27.13	132000	29	906608	F29:9820	No	FL1189_IPP114_PB_CB_vivax_6_even.raw	sp|P14406|CX7A2_HUMAN Cytochrome c oxidase subunit 7A2 mitochondrial OS=Homo sapiens OX=9606 GN=COX7A2 PE=1 SV=1			PEAKS DB
AVDSRTGKLT	21.09	1046.57	10	0.1	524.293	2	24.97	448000	10	659544	F10:9504	No	FL1029_IPP114_PB_CB_vivax_6_odd.raw	sp|Q02413|DSG1_HUMAN Desmoglein-1 OS=Homo sapiens OX=9606 GN=DSG1 PE=1 SV=2			PEAKS DB
AVEDLESVGKGA	21.93	1173.59	12	1.4	587.802	2	35.49	129000	8	708059	F8:13589	No	FL1029_IPP114_PB_CB_vivax_4_odd.raw	sp|P81605|DCD_HUMAN Dermcidin OS=Homo sapiens OX=9606 GN=DCD PE=1 SV=2			PEAKS DB
AVFVDLEPTVIDEVR	31.04	1700.9	15	1.6	851.458	2	50.32	677000	14	892944	F14:19266	No	FL1029_IPP114_PB_CB_vivax_8_odd.raw	sp|P68363|TBA1B_HUMAN Tubulin alpha-1B chain OS=Homo sapiens OX=9606 GN=TUBA1B PE=1 SV=1:sp|Q71U36|TBA1A_HUMAN Tubulin alpha-1A chain OS=Homo sapiens OX=9606 GN=TUBA1A PE=1 SV=1:sp|Q9BQE3|TBA1C_HUMAN Tubulin alpha-1C chain OS=Homo sapiens OX=9606 GN=TUBA1C PE=1 SV=1			PEAKS DB
AVGIIKAVEKKEPGAVSAKNPAKK	38.49	2432.45	24	2.2	609.12	4	30.45	1660000	13	971452	F13:11616	No	FL1029_IPP114_PB_CB_vivax_8_even.raw	tr|A5K2H7|A5K2H7_PLAVS Elongation factor 1-alpha OS=Plasmodium vivax (strain Salvador I) OX=126793 GN=PVX_114830 PE=3 SV=1			PEAKS DB
AVHCYTK	17.06	820.39	7	1	411.203	2	23.46		4	816102	F4:8919	No	FL1029_IPP114_PB_CB_vivax_2_odd.raw	tr|A5K4G1|A5K4G1_PLAVS Serine/threonine-protein kinase PRP4K putative OS=Plasmodium vivax (strain Salvador I) OX=126793 GN=PVX_091375 PE=4 SV=1			PEAKS DB
AVHKTLH	18.21	804.461	7	0.4	403.238	2	21.33	278000	3	860198	F3:8080	No	FL1029_IPP114_PB_CB_vivax_2_even.raw	sp|Q8TAX0|OSR1_HUMAN Protein odd-skipped-related 1 OS=Homo sapiens OX=9606 GN=OSR1 PE=2 SV=1			PEAKS DB
AVILPSLAAPLP	27.24	1160.72	12	-1.6	581.365	2	55.99		13	980608	F13:21419	No	FL1029_IPP114_PB_CB_vivax_8_even.raw	sp|Q9Y3S1|WNK2_HUMAN Serine/threonine-protein kinase WNK2 OS=Homo sapiens OX=9606 GN=WNK2 PE=1 SV=4			PEAKS DB
AVKKQKKTLKPVTK	29.63	1596.05	14	1.2	533.023	3	21.14	900000	14	882575	F14:7996	No	FL1029_IPP114_PB_CB_vivax_8_odd.raw	tr|A5KAW8|A5KAW8_PLAVS 60S ribosomal protein L31 putative OS=Plasmodium vivax (strain Salvador I) OX=126793 GN=PVX_097760 PE=4 SV=1			PEAKS DB
AVKKTPKKAKKPAAAGVK	42.16	1820.17	18	1.6	607.732	3	20.76	1210000	14	882465	F14:7884	No	FL1029_IPP114_PB_CB_vivax_8_odd.raw	sp|P16401|H15_HUMAN Histone H1.5 OS=Homo sapiens OX=9606 GN=HIST1H1B PE=1 SV=3			PEAKS DB
AVKKVGKIV	19.08	940.643	9	-0.5	471.329	2	25.31	123000	7	794221	F7:9599	No	FL1029_IPP114_PB_CB_vivax_4_even.raw	tr|A5K6B0|A5K6B0_PLAVS 60S ribosomal protein L32 putative OS=Plasmodium vivax (strain Salvador I) OX=126793 GN=PVX_098640 PE=4 SV=1			PEAKS DB
AVKKVGKIVK	22.03	1068.74	10	-0.8	357.253	3	22.96	214000	14	883213	F14:8716	No	FL1029_IPP114_PB_CB_vivax_8_odd.raw	tr|A5K6B0|A5K6B0_PLAVS 60S ribosomal protein L32 putative OS=Plasmodium vivax (strain Salvador I) OX=126793 GN=PVX_098640 PE=4 SV=1			PEAKS DB
AVKKVGKIVKK	22.6	1196.83	11	-1	399.951	3	21.81	4920000	14	882853	F14:8294	No	FL1029_IPP114_PB_CB_vivax_8_odd.raw	tr|A5K6B0|A5K6B0_PLAVS 60S ribosomal protein L32 putative OS=Plasmodium vivax (strain Salvador I) OX=126793 GN=PVX_098640 PE=4 SV=1			PEAKS DB
AVKKVGKIVKKRT	17.61	1453.98	13	-0.2	485.668	3	21.22	461000	32	1010582	F32:7667	No	FL1189b_IPP114_PB_CB_vivax_6_odd.raw	tr|A5K6B0|A5K6B0_PLAVS 60S ribosomal protein L32 putative OS=Plasmodium vivax (strain Salvador I) OX=126793 GN=PVX_098640 PE=4 SV=1			PEAKS DB
AVKKVGKIVKKRTK	22.38	1582.08	14	-1.3	396.526	4	24.32	316000	3	861295	F3:9231	No	FL1029_IPP114_PB_CB_vivax_2_even.raw	tr|A5K6B0|A5K6B0_PLAVS 60S ribosomal protein L32 putative OS=Plasmodium vivax (strain Salvador I) OX=126793 GN=PVX_098640 PE=4 SV=1			PEAKS DB
AVKPKAAKPKAAKPK	35.48	1531.99	15	1.5	384.006	4	20.42	758000	14	882320	F14:7769	No	FL1029_IPP114_PB_CB_vivax_8_odd.raw	sp|P16401|H15_HUMAN Histone H1.5 OS=Homo sapiens OX=9606 GN=HIST1H1B PE=1 SV=3			PEAKS DB
AVKPKAAKPKAAKPKA	39.78	1603.03	16	-0.3	535.35	3	21.41	840000	14	882677	F14:8116	No	FL1029_IPP114_PB_CB_vivax_8_odd.raw	sp|P16401|H15_HUMAN Histone H1.5 OS=Homo sapiens OX=9606 GN=HIST1H1B PE=1 SV=3			PEAKS DB
AVKPKAAKPKTAKPKAAKPK	23.65	2057.32	20	2.3	686.782	3	21.57	810000	14	882733	F14:8183	No	FL1029_IPP114_PB_CB_vivax_8_odd.raw	sp|P10412|H14_HUMAN Histone H1.4 OS=Homo sapiens OX=9606 GN=HIST1H1E PE=1 SV=2			PEAKS DB
AVKPKAAKPKVVKPKKAAPK	17.21	2083.37	20	1	521.851	4	22.46	502000	13	968604	F13:8489	No	FL1029_IPP114_PB_CB_vivax_8_even.raw	sp|P16403|H12_HUMAN Histone H1.2 OS=Homo sapiens OX=9606 GN=HIST1H1C PE=1 SV=2			PEAKS DB
AVKVDKKAPAKPQKEDAKGGKKK	43.79	2448.45	23	2.4	613.122	4	20.73	1640000	14	882451	F14:7869	No	FL1029_IPP114_PB_CB_vivax_8_odd.raw	tr|A5K858|A5K858_PLAVS 40S ribosomal protein S6 putative OS=Plasmodium vivax (strain Salvador I) OX=126793 GN=PVX_083000 PE=4 SV=1			PEAKS DB
AVKVDKKAPAKPQKEDAKGGKKKK	23.79	2576.55	24	2.5	645.146	4	20.9	18100000	14	882512	F14:8772	No	FL1029_IPP114_PB_CB_vivax_8_odd.raw	tr|A5K858|A5K858_PLAVS 40S ribosomal protein S6 putative OS=Plasmodium vivax (strain Salvador I) OX=126793 GN=PVX_083000 PE=4 SV=1			PEAKS DB
AVLRFNGAPTAN	21.16	1229.65	12	-0.7	615.833	2	38.35	151000	32	1016239	F32:13869	No	FL1189b_IPP114_PB_CB_vivax_6_odd.raw	sp|P15907|SIAT1_HUMAN Beta-galactoside alpha-2 6-sialyltransferase 1 OS=Homo sapiens OX=9606 GN=ST6GAL1 PE=1 SV=1			PEAKS DB
AVLRFNGAPTANFQ	31.24	1504.78	14	1.2	753.398	2	44.55	360000	32	1018285	F32:16104	No	FL1189b_IPP114_PB_CB_vivax_6_odd.raw	sp|P15907|SIAT1_HUMAN Beta-galactoside alpha-2 6-sialyltransferase 1 OS=Homo sapiens OX=9606 GN=ST6GAL1 PE=1 SV=1			PEAKS DB
AVM(+15.99)GNPKVK	24.29	958.527	9	0	480.271	2	21.45	241000	32	1010653	F32:7734	No	FL1189b_IPP114_PB_CB_vivax_6_odd.raw	sp|P68871|HBB_HUMAN Hemoglobin subunit beta OS=Homo sapiens OX=9606 GN=HBB PE=1 SV=2:sp|P02042|HBD_HUMAN Hemoglobin subunit delta OS=Homo sapiens OX=9606 GN=HBD PE=1 SV=2	Oxidation (M)	M3:Oxidation (M):1000.00	PEAKS PTM
AVPSSVASHG	19.17	910.451	10	0.3	456.233	2	27.92	176000	29	906878	F29:9959	No	FL1189_IPP114_PB_CB_vivax_6_even.raw	tr|A5K1Y1|A5K1Y1_PLAVS Transporter putative OS=Plasmodium vivax (strain Salvador I) OX=126793 GN=PVX_113850 PE=4 SV=1			PEAKS DB
AVSAKNPAKK	15.79	1012.6	10	1.3	507.309	2	20.1	73600	6	945356	F6:7659	No	FL1029_IPP114_PB_CB_vivax_3_odd.raw	tr|A5K2H7|A5K2H7_PLAVS Elongation factor 1-alpha OS=Plasmodium vivax (strain Salvador I) OX=126793 GN=PVX_114830 PE=3 SV=1			PEAKS DB
AVVDVIREL	19.3	1012.59	9	0.2	507.303	2	48.69		10	667982	F10:18587	No	FL1029_IPP114_PB_CB_vivax_6_odd.raw	sp|P12273|PIP_HUMAN Prolactin-inducible protein OS=Homo sapiens OX=9606 GN=PIP PE=1 SV=1			PEAKS DB
AVVVPSGEEQRYT	22.75	1433.71	13	-0.6	717.864	2	36.13	270000	32	1015510	F32:13065	No	FL1189b_IPP114_PB_CB_vivax_6_odd.raw	sp|Q29940|1B59_HUMAN HLA class I histocompatibility antigen B-59 alpha chain OS=Homo sapiens OX=9606 GN=HLA-B PE=1 SV=1:sp|P01889|1B07_HUMAN HLA class I histocompatibility antigen B-7 alpha chain OS=Homo sapiens OX=9606 GN=HLA-B PE=1 SV=3:sp|P30475|1B39_HUMAN HLA class I histocompatibility antigen B-39 alpha chain OS=Homo sapiens OX=9606 GN=HLA-B PE=1 SV=1:sp|Q29836|1B67_HUMAN HLA class I histoco…			PEAKS DB
AVYDRPGASPK	16.14	1159.6	11	-0.3	580.806	2	25.8	222000	5	771921	F5:9789	No	FL1029_IPP114_PB_CB_vivax_3_even.raw	sp|Q12769|NU160_HUMAN Nuclear pore complex protein Nup160 OS=Homo sapiens OX=9606 GN=NUP160 PE=1 SV=3			PEAKS DB
AWGPAAI	15.83	684.36	7	0.1	343.187	2	50.46	2600000	13	978568	F13:19321	No	FL1029_IPP114_PB_CB_vivax_8_even.raw	sp|A0AVI2|FR1L5_HUMAN Fer-1-like protein 5 OS=Homo sapiens OX=9606 GN=FER1L5 PE=2 SV=3			PEAKS DB
AYLHTTTTF	26.94	1053.51	9	-0.5	527.764	2	37.31	359000	11	641456	F11:14201	No	FL1029_IPP114_PB_CB_vivax_7_even.raw	sp|O15438|MRP3_HUMAN Canalicular multispecific organic anion transporter 2 OS=Homo sapiens OX=9606 GN=ABCC3 PE=1 SV=3			PEAKS DB
AYTLLLHTW	15.46	1116.6	9	-1.3	559.305	2	49.96	155000	30	934478	F30:18041	No	FL1189_IPP114_PB_CB_vivax_6_odd.raw	sp|Q92608|DOCK2_HUMAN Dedicator of cytokinesis protein 2 OS=Homo sapiens OX=9606 GN=DOCK2 PE=1 SV=2			PEAKS DB
AYVKVVKNKAYFKRYQV	19.75	2103.2	17	-0.6	526.807	4	35.29	781000	8	707990	F8:13572	No	FL1029_IPP114_PB_CB_vivax_4_odd.raw	tr|A5K0Z7|A5K0Z7_PLAVS 60S ribosomal protein family L5 putative OS=Plasmodium vivax (strain Salvador I) OX=126793 GN=PVX_085275 PE=3 SV=1			PEAKS DB
AYVPGFAHI	19.22	973.502	9	-1.9	487.757	2	45.95	121000	32	1018737	F32:16622	No	FL1189b_IPP114_PB_CB_vivax_6_odd.raw	sp|Q9H467|CUED2_HUMAN CUE domain-containing protein 2 OS=Homo sapiens OX=9606 GN=CUEDC2 PE=1 SV=1			PEAKS DB
C(+47.98)PTQRYNFRS	23.62	1318.57	10	4.5	660.296	2	32.15	138000	8	706931	F8:12296	No	FL1029_IPP114_PB_CB_vivax_4_odd.raw	tr|A5JZN9|A5JZN9_PLAVS 60S ribosomal protein L13 putative OS=Plasmodium vivax (strain Salvador I) OX=126793 GN=PVX_123070 PE=3 SV=1	Cysteine oxidation to cysteic acid	C1:Cysteine oxidation to cysteic acid:1000.00	PEAKS PTM
CPGPQAH	16.69	708.301	7	4.9	355.16	2	30.2		4	818486	F4:11527	No	FL1029_IPP114_PB_CB_vivax_2_odd.raw	sp|Q9NRC6|SPTN5_HUMAN Spectrin beta chain non-erythrocytic 5 OS=Homo sapiens OX=9606 GN=SPTBN5 PE=1 SV=2			PEAKS DB
CQGCEEDEE	15.1	1040.31	9	-4.8	521.158	2	34.49		14	887323	F14:13162	No	FL1029_IPP114_PB_CB_vivax_8_odd.raw	sp|Q5S007|LRRK2_HUMAN Leucine-rich repeat serine/threonine-protein kinase 2 OS=Homo sapiens OX=9606 GN=LRRK2 PE=1 SV=2			PEAKS DB
DAARFPII	19.75	901.502	8	0	451.758	2	49.59	249000	32	1019929	F32:17899	No	FL1189b_IPP114_PB_CB_vivax_6_odd.raw	sp|Q8TCT9|HM13_HUMAN Minor histocompatibility antigen H13 OS=Homo sapiens OX=9606 GN=HM13 PE=1 SV=1			PEAKS DB
DAFRVNVI	17.78	932.508	8	-1.3	467.261	2	47.63	125000	32	1019293	F32:17209	No	FL1189b_IPP114_PB_CB_vivax_6_odd.raw	sp|Q96CW1|AP2M1_HUMAN AP-2 complex subunit mu OS=Homo sapiens OX=9606 GN=AP2M1 PE=1 SV=2			PEAKS DB
DAGAGIALNDH	26.18	1052.49	11	-0.3	527.251	2	36.59	98100	32	1015661	F32:13243	No	FL1189b_IPP114_PB_CB_vivax_6_odd.raw	sp|P04406|G3P_HUMAN Glyceraldehyde-3-phosphate dehydrogenase OS=Homo sapiens OX=9606 GN=GAPDH PE=1 SV=3			PEAKS DB
DAGAGIALNDHF	23.85	1199.56	12	0.3	600.786	2	45.42	66100	11	644326	F11:17365	No	FL1029_IPP114_PB_CB_vivax_7_even.raw	sp|P04406|G3P_HUMAN Glyceraldehyde-3-phosphate dehydrogenase OS=Homo sapiens OX=9606 GN=GAPDH PE=1 SV=3			PEAKS DB
DAGGPERPG	15.92	854.388	9	-0.8	428.201	2	23.64	160000	30	925786	F30:8564	No	FL1189_IPP114_PB_CB_vivax_6_odd.raw	sp|Q6P4F2|FDX2_HUMAN Ferredoxin-2 mitochondrial OS=Homo sapiens OX=9606 GN=FDX2 PE=1 SV=2			PEAKS DB
DAGTKHG	16.12	684.319	7	-3.5	343.166	2	23.51	1290000	3	861028	F3:8804	No	FL1029_IPP114_PB_CB_vivax_2_even.raw	tr|A5K581|A5K581_PLAVS Uncharacterized protein OS=Plasmodium vivax (strain Salvador I) OX=126793 GN=PVX_092720 PE=4 SV=1			PEAKS DB
DAHIYLNHI	16.39	1094.55	9	-0.1	548.283	2	39.68	103000	29	910751	F29:14352	No	FL1189_IPP114_PB_CB_vivax_6_even.raw	sp|P04818|TYSY_HUMAN Thymidylate synthase OS=Homo sapiens OX=9606 GN=TYMS PE=1 SV=3			PEAKS DB
DAKIRIFDL	23.59	1089.62	9	1.5	545.817	2	47.15	452000	11	644943	F11:17997	No	FL1029_IPP114_PB_CB_vivax_7_even.raw	sp|Q96L21|RL10L_HUMAN 60S ribosomal protein L10-like OS=Homo sapiens OX=9606 GN=RPL10L PE=1 SV=3			PEAKS DB
DAKLDK(+14.02)GQI	18.57	1000.56	9	1.1	501.286	2	29.92	251000	11	638831	F11:11371	No	FL1029_IPP114_PB_CB_vivax_7_even.raw	sp|P54652|HSP72_HUMAN Heat shock-related 70 kDa protein 2 OS=Homo sapiens OX=9606 GN=HSPA2 PE=1 SV=1	Methylation(KR)	K6:Methylation(KR):37.54	PEAKS PTM
DAKRLIAV	19.21	884.544	8	-1	443.279	2	34.15	184000	12	685179	F12:13048	No	FL1029_IPP114_PB_CB_vivax_7_odd.raw	sp|Q63HN8|RN213_HUMAN E3 ubiquitin-protein ligase RNF213 OS=Homo sapiens OX=9606 GN=RNF213 PE=1 SV=3			PEAKS DB
DALKDLNTL	23.74	1001.54	9	2.7	501.778	2	44.53	850000	3	868466	F3:17014	No	FL1029_IPP114_PB_CB_vivax_2_even.raw	sp|P02549|SPTA1_HUMAN Spectrin alpha chain erythrocytic 1 OS=Homo sapiens OX=9606 GN=SPTA1 PE=1 SV=5			PEAKS DB
DANKALLPTAGDD	24.05	1299.63	13	-0.3	650.822	2	39.13	104000	14	888975	F14:14972	No	FL1029_IPP114_PB_CB_vivax_8_odd.raw	tr|A5KAZ9|A5KAZ9_PLAVS 60S ribosomal subunit protein L4/L1 putative OS=Plasmodium vivax (strain Salvador I) OX=126793 GN=PVX_097915 PE=4 SV=1			PEAKS DB
DANPYDSVKKI	30.06	1248.63	11	1.6	625.326	2	34.53	414000	4	819999	F4:13191	No	FL1029_IPP114_PB_CB_vivax_2_odd.raw	sp|O15205|UBD_HUMAN Ubiquitin D OS=Homo sapiens OX=9606 GN=UBD PE=1 SV=2			PEAKS DB
DAPHPPLKI	18.26	986.555	9	-0.5	494.284	2	35.62	185000	12	685685	F12:13608	No	FL1029_IPP114_PB_CB_vivax_7_odd.raw	sp|P54368|OAZ1_HUMAN Ornithine decarboxylase antizyme 1 OS=Homo sapiens OX=9606 GN=OAZ1 PE=1 SV=3			PEAKS DB
DAPIVAHL	18.71	834.46	8	4.8	418.239	2	43.9		32	1018069	F32:15877	No	FL1189b_IPP114_PB_CB_vivax_6_odd.raw	sp|P50416|CPT1A_HUMAN Carnitine O-palmitoyltransferase 1 liver isoform OS=Homo sapiens OX=9606 GN=CPT1A PE=1 SV=2			PEAKS DB
DAPRIKKI	18.72	939.587	8	-1.1	470.8	2	26.58	2930000	31	991972	F31:9590	No	FL1189b_IPP114_PB_CB_vivax_6_even.raw	sp|P02775|CXCL7_HUMAN Platelet basic protein OS=Homo sapiens OX=9606 GN=PPBP PE=1 SV=3			PEAKS DB
DASKVVTVF	16.78	964.523	9	0.5	483.269	2	45.84	124000	31	998320	F31:16542	No	FL1189b_IPP114_PB_CB_vivax_6_even.raw	sp|O75083|WDR1_HUMAN WD repeat-containing protein 1 OS=Homo sapiens OX=9606 GN=WDR1 PE=1 SV=4			PEAKS DB
DAVEDLESVGK	16.61	1160.56	11	2.2	581.287	2	43.58	74100	31	997576	F31:15734	No	FL1189b_IPP114_PB_CB_vivax_6_even.raw	sp|P81605|DCD_HUMAN Dermcidin OS=Homo sapiens OX=9606 GN=DCD PE=1 SV=2			PEAKS DB
DAVLRFN(+.98)GAPTANFQ	33.72	1620.79	15	1.3	811.403	2	49.27		32	1019813	F32:17776	No	FL1189b_IPP114_PB_CB_vivax_6_odd.raw	sp|P15907|SIAT1_HUMAN Beta-galactoside alpha-2 6-sialyltransferase 1 OS=Homo sapiens OX=9606 GN=ST6GAL1 PE=1 SV=1	Deamidation (NQ)	N7:Deamidation (NQ):90.57	PEAKS PTM
DAVLRFNGAPTA	15.42	1230.64	12	-0.5	616.325	2	44.08	397000	29	912206	F29:15938	No	FL1189_IPP114_PB_CB_vivax_6_even.raw	sp|P15907|SIAT1_HUMAN Beta-galactoside alpha-2 6-sialyltransferase 1 OS=Homo sapiens OX=9606 GN=ST6GAL1 PE=1 SV=1			PEAKS DB
DAVLRFNGAPTAN	36.82	1344.68	13	0.2	673.347	2	42.67	3040000	32	1017659	F32:15409	No	FL1189b_IPP114_PB_CB_vivax_6_odd.raw	sp|P15907|SIAT1_HUMAN Beta-galactoside alpha-2 6-sialyltransferase 1 OS=Homo sapiens OX=9606 GN=ST6GAL1 PE=1 SV=1			PEAKS DB
DAVLRFNGAPTAN(+.98)FQ	41.37	1620.79	15	-1.1	811.401	2	49.01	1250000	30	934166	F30:17710	No	FL1189_IPP114_PB_CB_vivax_6_odd.raw	sp|P15907|SIAT1_HUMAN Beta-galactoside alpha-2 6-sialyltransferase 1 OS=Homo sapiens OX=9606 GN=ST6GAL1 PE=1 SV=1	Deamidation (NQ)	N13:Deamidation (NQ):22.94	PEAKS PTM
DAVLRFNGAPTANF	44.65	1491.75	14	0.4	746.881	2	49.43	2670000	32	1019872	F32:17839	No	FL1189b_IPP114_PB_CB_vivax_6_odd.raw	sp|P15907|SIAT1_HUMAN Beta-galactoside alpha-2 6-sialyltransferase 1 OS=Homo sapiens OX=9606 GN=ST6GAL1 PE=1 SV=1			PEAKS DB
DAVLRFNGAPTANFQ	20.58	1619.81	15	2.6	810.912	2	49.56	60400	32	1019919	F32:17890	No	FL1189b_IPP114_PB_CB_vivax_6_odd.raw	sp|P15907|SIAT1_HUMAN Beta-galactoside alpha-2 6-sialyltransferase 1 OS=Homo sapiens OX=9606 GN=ST6GAL1 PE=1 SV=1			PEAKS DB
DAVLRFNGAPTANFQ(+.98)	47.19	1620.79	15	0.3	811.402	2	48.92	1190000	32	1019702	F32:17648	No	FL1189b_IPP114_PB_CB_vivax_6_odd.raw	sp|P15907|SIAT1_HUMAN Beta-galactoside alpha-2 6-sialyltransferase 1 OS=Homo sapiens OX=9606 GN=ST6GAL1 PE=1 SV=1	Deamidation (NQ)	Q15:Deamidation (NQ):54.01	PEAKS PTM
DAVLRFNGAPTANFQQ	37.45	1747.86	16	-0.8	874.939	2	47.36	501000	32	1019203	F32:17102	No	FL1189b_IPP114_PB_CB_vivax_6_odd.raw	sp|P15907|SIAT1_HUMAN Beta-galactoside alpha-2 6-sialyltransferase 1 OS=Homo sapiens OX=9606 GN=ST6GAL1 PE=1 SV=1			PEAKS DB
DAVVKHVL	22.82	879.518	8	-0.7	440.766	2	31.96	122000	11	639569	F11:12173	No	FL1029_IPP114_PB_CB_vivax_7_even.raw	sp|P53621|COPA_HUMAN Coatomer subunit alpha OS=Homo sapiens OX=9606 GN=COPA PE=1 SV=2			PEAKS DB
DAYPEIEKF	29.41	1110.52	9	1.6	556.27	2	44.47	2890000	4	823533	F4:17005	No	FL1029_IPP114_PB_CB_vivax_2_odd.raw	sp|O95997|PTTG1_HUMAN Securin OS=Homo sapiens OX=9606 GN=PTTG1 PE=1 SV=1:sp|Q9NZH5|PTTG2_HUMAN Securin-2 OS=Homo sapiens OX=9606 GN=PTTG2 PE=2 SV=2			PEAKS DB
DAYPFAQHF	24.45	1094.48	9	0.4	548.249	2	46.11	3160000	4	824104	F4:17652	No	FL1029_IPP114_PB_CB_vivax_2_odd.raw	sp|P22557|HEM0_HUMAN 5-aminolevulinate synthase erythroid-specific mitochondrial OS=Homo sapiens OX=9606 GN=ALAS2 PE=1 SV=2			PEAKS DB
DAYTKKEL	21.51	966.502	8	-0.7	484.258	2	27.1	218000	11	637826	F11:10305	No	FL1029_IPP114_PB_CB_vivax_7_even.raw	sp|Q9Y490|TLN1_HUMAN Talin-1 OS=Homo sapiens OX=9606 GN=TLN1 PE=1 SV=3			PEAKS DB
DAYTKKELI	18.42	1079.59	9	-0.5	540.8	2	33.56	140000	32	1014653	F32:12151	No	FL1189b_IPP114_PB_CB_vivax_6_odd.raw	sp|Q9Y490|TLN1_HUMAN Talin-1 OS=Homo sapiens OX=9606 GN=TLN1 PE=1 SV=3			PEAKS DB
DAYVILKTV	19.34	1020.59	9	-1	511.3	2	48.57	121000	31	999205	F31:17502	No	FL1189b_IPP114_PB_CB_vivax_6_even.raw	sp|P06396|GELS_HUMAN Gelsolin OS=Homo sapiens OX=9606 GN=GSN PE=1 SV=1			PEAKS DB
DAYVLPKL	18.33	917.522	8	-1.7	459.768	2	48.78	56200	32	1019667	F32:17617	No	FL1189b_IPP114_PB_CB_vivax_6_odd.raw	sp|Q5JNZ5|RS26L_HUMAN Putative 40S ribosomal protein S26-like 1 OS=Homo sapiens OX=9606 GN=RPS26P11 PE=5 SV=1			PEAKS DB
DAYVLPKLY	16.86	1080.59	9	0.3	541.3	2	49.86	237000	32	1020019	F32:18007	No	FL1189b_IPP114_PB_CB_vivax_6_odd.raw	sp|Q5JNZ5|RS26L_HUMAN Putative 40S ribosomal protein S26-like 1 OS=Homo sapiens OX=9606 GN=RPS26P11 PE=5 SV=1			PEAKS DB
DCRENKLEKT	16.01	1234.6	10	-4	618.304	2	30.61		11	639079	F11:11643	No	FL1029_IPP114_PB_CB_vivax_7_even.raw	sp|Q5VVW2|GARL3_HUMAN GTPase-activating Rap/Ran-GAP domain-like protein 3 OS=Homo sapiens OX=9606 GN=GARNL3 PE=2 SV=2			PEAKS DB
DDCGDGSDERG	18.67	1124.37	11	-0.8	563.191	2	49.57		14	892677	F14:18962	No	FL1029_IPP114_PB_CB_vivax_8_odd.raw	sp|Q14114|LRP8_HUMAN Low-density lipoprotein receptor-related protein 8 OS=Homo sapiens OX=9606 GN=LRP8 PE=1 SV=4			PEAKS DB
DDEVDVDGTVEEDLGK	17.59	1733.75	16	0.5	867.882	2	45.36	35900	10	666836	F10:17318	No	FL1029_IPP114_PB_CB_vivax_6_odd.raw	sp|P14625|ENPL_HUMAN Endoplasmin OS=Homo sapiens OX=9606 GN=HSP90B1 PE=1 SV=1			PEAKS DB
DDHDAVLRFNGAPTAN	15.6	1711.79	16	-0.1	571.604	3	40.62	290000	32	1016976	F32:14700	No	FL1189b_IPP114_PB_CB_vivax_6_odd.raw	sp|P15907|SIAT1_HUMAN Beta-galactoside alpha-2 6-sialyltransferase 1 OS=Homo sapiens OX=9606 GN=ST6GAL1 PE=1 SV=1			PEAKS DB
DDHDAVLRFNGAPTANFQ	44.95	1986.92	18	0	663.313	3	46.05	4230000	32	1018769	F32:16633	No	FL1189b_IPP114_PB_CB_vivax_6_odd.raw	sp|P15907|SIAT1_HUMAN Beta-galactoside alpha-2 6-sialyltransferase 1 OS=Homo sapiens OX=9606 GN=ST6GAL1 PE=1 SV=1			PEAKS DB
DDHDAVLRFNGAPTANFQQ	31.02	2114.98	19	0.9	706	3	45.44	513000	32	1018571	F32:16425	No	FL1189b_IPP114_PB_CB_vivax_6_odd.raw	sp|P15907|SIAT1_HUMAN Beta-galactoside alpha-2 6-sialyltransferase 1 OS=Homo sapiens OX=9606 GN=ST6GAL1 PE=1 SV=1			PEAKS DB
DDHDAVLRFNGAPTANFQQDVG	22.64	2386.09	22	0.6	796.372	3	47.3	282000	32	1019184	F32:17090	No	FL1189b_IPP114_PB_CB_vivax_6_odd.raw	sp|P15907|SIAT1_HUMAN Beta-galactoside alpha-2 6-sialyltransferase 1 OS=Homo sapiens OX=9606 GN=ST6GAL1 PE=1 SV=1			PEAKS DB
DDHSSCA	16.68	733.234	7	3.3	367.625	2	35.49		32	1015292	F32:12841	No	FL1189b_IPP114_PB_CB_vivax_6_odd.raw	sp|Q8TE56|ATS17_HUMAN A disintegrin and metalloproteinase with thrombospondin motifs 17 OS=Homo sapiens OX=9606 GN=ADAMTS17 PE=2 SV=2			PEAKS DB
DDPSRYISPDQL	24.51	1404.65	12	0.6	703.334	2	46.34	136000	11	644658	F11:17700	No	FL1029_IPP114_PB_CB_vivax_7_even.raw	sp|P06733|ENOA_HUMAN Alpha-enolase OS=Homo sapiens OX=9606 GN=ENO1 PE=1 SV=2			PEAKS DB
DDSEEKEEQGQKPEKV	30.14	1873.85	16	0.9	625.626	3	24.67	1050000	14	883829	F14:9375	No	FL1029_IPP114_PB_CB_vivax_8_odd.raw	tr|A5K8G8|A5K8G8_PLAVS Uncharacterized protein OS=Plasmodium vivax (strain Salvador I) OX=126793 GN=PVX_083555 PE=4 SV=1			PEAKS DB
DDTQFVRFDSDAASPR	34.81	1825.82	16	0.5	609.615	3	41.49	191000	31	996885	F31:14978	No	FL1189b_IPP114_PB_CB_vivax_6_even.raw	sp|Q29940|1B59_HUMAN HLA class I histocompatibility antigen B-59 alpha chain OS=Homo sapiens OX=9606 GN=HLA-B PE=1 SV=1:sp|P01889|1B07_HUMAN HLA class I histocompatibility antigen B-7 alpha chain OS=Homo sapiens OX=9606 GN=HLA-B PE=1 SV=3:sp|P30475|1B39_HUMAN HLA class I histocompatibility antigen B-39 alpha chain OS=Homo sapiens OX=9606 GN=HLA-B PE=1 SV=1:sp|Q29836|1B67_HUMAN HLA class I histoco…			PEAKS DB
DDTQFVRFDSDAASQR	30.52	1856.83	16	-1.4	619.949	3	40.49	211000	31	996554	F31:14619	No	FL1189b_IPP114_PB_CB_vivax_6_even.raw	sp|P13746|1A11_HUMAN HLA class I histocompatibility antigen A-11 alpha chain OS=Homo sapiens OX=9606 GN=HLA-A PE=1 SV=1:sp|P04439|1A03_HUMAN HLA class I histocompatibility antigen A-3 alpha chain OS=Homo sapiens OX=9606 GN=HLA-A PE=1 SV=2:sp|P16188|1A30_HUMAN HLA class I histocompatibility antigen A-30 alpha chain OS=Homo sapiens OX=9606 GN=HLA-A PE=1 SV=2:sp|P05534|1A24_HUMAN HLA class I histoco…			PEAKS DB
DDWEALIHQ	16.81	1125.51	9	-0.1	563.762	2	49.73	370000	32	1019970	F32:17958	No	FL1189b_IPP114_PB_CB_vivax_6_odd.raw	sp|Q9UIQ6|LCAP_HUMAN Leucyl-cystinyl aminopeptidase OS=Homo sapiens OX=9606 GN=LNPEP PE=1 SV=3			PEAKS DB
DEAAFLERL	15.86	1062.53	9	1.4	532.275	2	49.66		8	713090	F8:19058	No	FL1029_IPP114_PB_CB_vivax_4_odd.raw	sp|Q05682|CALD1_HUMAN Caldesmon OS=Homo sapiens OX=9606 GN=CALD1 PE=1 SV=3			PEAKS DB
DEDSYNYDDSEEKEEQGQKPEKV	47.07	2760.15	23	2.2	921.06	3	30.41		14	885872	F14:11589	No	FL1029_IPP114_PB_CB_vivax_8_odd.raw	tr|A5K8G8|A5K8G8_PLAVS Uncharacterized protein OS=Plasmodium vivax (strain Salvador I) OX=126793 GN=PVX_083555 PE=4 SV=1			PEAKS DB
DEERQGPPLGGQ	25.86	1281.59	12	1.7	641.806	2	30.89	130000	9	729132	F9:11753	No	FL1029_IPP114_PB_CB_vivax_6_even.raw	sp|P02810|PRPC_HUMAN Salivary acidic proline-rich phosphoprotein 1/2 OS=Homo sapiens OX=9606 GN=PRH1 PE=1 SV=2			PEAKS DB
DEFLHINDF	27.96	1148.51	9	-0.1	575.264	2	50.39	349000	7	803184	F7:19308	No	FL1029_IPP114_PB_CB_vivax_4_even.raw	sp|O43432|IF4G3_HUMAN Eukaryotic translation initiation factor 4 gamma 3 OS=Homo sapiens OX=9606 GN=EIF4G3 PE=1 SV=2			PEAKS DB
DEHINVAF	18.25	943.44	8	-0.7	472.727	2	43.93	1190000	7	800898	F7:16800	No	FL1029_IPP114_PB_CB_vivax_4_even.raw	sp|Q86UX7|URP2_HUMAN Fermitin family homolog 3 OS=Homo sapiens OX=9606 GN=FERMT3 PE=1 SV=1			PEAKS DB
DEIERVAK	25.14	958.508	8	1.1	480.262	2	27.63		11	638012	F11:10496	No	FL1029_IPP114_PB_CB_vivax_7_even.raw	tr|A5KC61|A5KC61_PLAVS 40S ribosomal protein S5 putative OS=Plasmodium vivax (strain Salvador I) OX=126793 GN=PVX_096265 PE=3 SV=1			PEAKS DB
DELERVAK	25.14	958.508	8	1.1	480.262	2	27.63		11	638012	F11:10496	No	FL1029_IPP114_PB_CB_vivax_7_even.raw	sp|P46782|RS5_HUMAN 40S ribosomal protein S5 OS=Homo sapiens OX=9606 GN=RPS5 PE=1 SV=4			PEAKS DB
DENELKEFF	26.21	1169.52	9	0.1	585.769	2	50.21	177000	7	803115	F7:19240	No	FL1029_IPP114_PB_CB_vivax_4_even.raw	sp|Q9UN86|G3BP2_HUMAN Ras GTPase-activating protein-binding protein 2 OS=Homo sapiens OX=9606 GN=G3BP2 PE=1 SV=2			PEAKS DB
DEVQVVRGHY	36.23	1200.59	10	2.4	601.303	2	31.89	334000	8	706839	F8:12185	No	FL1029_IPP114_PB_CB_vivax_4_odd.raw	sp|P61254|RL26_HUMAN 60S ribosomal protein L26 OS=Homo sapiens OX=9606 GN=RPL26 PE=1 SV=1:sp|Q9UNX3|RL26L_HUMAN 60S ribosomal protein L26-like 1 OS=Homo sapiens OX=9606 GN=RPL26L1 PE=1 SV=1			PEAKS DB
DEVRTLTY	21.95	995.492	8	2.6	498.755	2	37.09	130000	8	708617	F8:14215	No	FL1029_IPP114_PB_CB_vivax_4_odd.raw	sp|Q9NR22|ANM8_HUMAN Protein arginine N-methyltransferase 8 OS=Homo sapiens OX=9606 GN=PRMT8 PE=1 SV=2			PEAKS DB
DEYSLVREL	32.44	1122.56	9	2.7	562.287	2	48.36		8	712639	F8:18564	No	FL1029_IPP114_PB_CB_vivax_4_odd.raw	sp|Q9Y490|TLN1_HUMAN Talin-1 OS=Homo sapiens OX=9606 GN=TLN1 PE=1 SV=3			PEAKS DB
DEYYTEGDGEGE	16.14	1362.47	12	-2.5	682.242	2	36.68	338000	10	663766	F10:14115	No	FL1029_IPP114_PB_CB_vivax_6_odd.raw	sp|P20908|CO5A1_HUMAN Collagen alpha-1(V) chain OS=Homo sapiens OX=9606 GN=COL5A1 PE=1 SV=3			PEAKS DB
DFASPFHER	15.55	1104.5	9	0.8	553.257	2	37.46	264000	31	995570	F31:13523	No	FL1189b_IPP114_PB_CB_vivax_6_even.raw	sp|Q9H4X1|RGCC_HUMAN Regulator of cell cycle RGCC OS=Homo sapiens OX=9606 GN=RGCC PE=1 SV=1			PEAKS DB
DFFGNGPPVNYKTG	37.43	1511.7	14	-0.3	756.859	2	46.79	535000	32	1019017	F32:16897	No	FL1189b_IPP114_PB_CB_vivax_6_odd.raw	sp|P13284|GILT_HUMAN Gamma-interferon-inducible lysosomal thiol reductase OS=Homo sapiens OX=9606 GN=IFI30 PE=1 SV=3			PEAKS DB
DGDHSDYNT	19.05	1022.36	9	1.6	512.187	2	40.78		31	996651	F31:14719	No	FL1189b_IPP114_PB_CB_vivax_6_even.raw	tr|A5K1M4|A5K1M4_PLAVS Uncharacterized protein OS=Plasmodium vivax (strain Salvador I) OX=126793 GN=PVX_113295 PE=4 SV=1			PEAKS DB
DGEAGAQGPPGPAGPA	22.16	1347.61	16	-0.1	674.81	2	36.26	182000	31	995180	F31:13091	No	FL1189b_IPP114_PB_CB_vivax_6_even.raw	sp|P02452|CO1A1_HUMAN Collagen alpha-1(I) chain OS=Homo sapiens OX=9606 GN=COL1A1 PE=1 SV=5			PEAKS DB
DGEFSM(+15.99)DLRTKSTG	16.12	1558.69	14	0.6	520.572	3	33.08	378000	31	994125	F31:11939	No	FL1189b_IPP114_PB_CB_vivax_6_even.raw	sp|P07737|PROF1_HUMAN Profilin-1 OS=Homo sapiens OX=9606 GN=PFN1 PE=1 SV=2	Oxidation (M)	M6:Oxidation (M):1000.00	PEAKS PTM
DGEFSM(+15.99)DLRTKSTGGAPT	21.56	1884.85	18	-1.3	629.291	3	34.99	294000	30	929559	F30:12668	No	FL1189_IPP114_PB_CB_vivax_6_odd.raw	sp|P07737|PROF1_HUMAN Profilin-1 OS=Homo sapiens OX=9606 GN=PFN1 PE=1 SV=2	Oxidation (M)	M6:Oxidation (M):1000.00	PEAKS PTM
DGEFSMDLRTKSTG	21.3	1542.7	14	-0.3	772.356	2	38.66	113000	31	995957	F31:13959	No	FL1189b_IPP114_PB_CB_vivax_6_even.raw	sp|P07737|PROF1_HUMAN Profilin-1 OS=Homo sapiens OX=9606 GN=PFN1 PE=1 SV=2			PEAKS DB
DGEFSMDLRTKSTGGAPT	15.81	1868.86	18	-0.5	623.959	3	39.68	527000	31	996287	F31:14306	No	FL1189b_IPP114_PB_CB_vivax_6_even.raw	sp|P07737|PROF1_HUMAN Profilin-1 OS=Homo sapiens OX=9606 GN=PFN1 PE=1 SV=2			PEAKS DB
DGKDYIALNEDLR	25.73	1520.75	13	-0.1	761.381	2	41.82	135000	31	996996	F31:15099	No	FL1189b_IPP114_PB_CB_vivax_6_even.raw	sp|P01889|1B07_HUMAN HLA class I histocompatibility antigen B-7 alpha chain OS=Homo sapiens OX=9606 GN=HLA-B PE=1 SV=3:sp|P30480|1B42_HUMAN HLA class I histocompatibility antigen B-42 alpha chain OS=Homo sapiens OX=9606 GN=HLA-B PE=1 SV=1:sp|P30460|1B08_HUMAN HLA class I histocompatibility antigen B-8 alpha chain OS=Homo sapiens OX=9606 GN=HLA-B PE=1 SV=1:sp|P30486|1B48_HUMAN HLA class I histocom…			PEAKS DB
DGKDYIALNEDLRS	25.62	1607.78	14	-0.4	536.933	3	41.62	271000	31	996928	F31:15037	No	FL1189b_IPP114_PB_CB_vivax_6_even.raw	sp|P01889|1B07_HUMAN HLA class I histocompatibility antigen B-7 alpha chain OS=Homo sapiens OX=9606 GN=HLA-B PE=1 SV=3:sp|P30480|1B42_HUMAN HLA class I histocompatibility antigen B-42 alpha chain OS=Homo sapiens OX=9606 GN=HLA-B PE=1 SV=1:sp|P30460|1B08_HUMAN HLA class I histocompatibility antigen B-8 alpha chain OS=Homo sapiens OX=9606 GN=HLA-B PE=1 SV=1:sp|P30486|1B48_HUMAN HLA class I histocom…			PEAKS DB
DGKDYIALNEDLS	25.34	1451.68	13	1.2	726.847	2	46.95	273000	31	998683	F31:16938	No	FL1189b_IPP114_PB_CB_vivax_6_even.raw	sp|Q29940|1B59_HUMAN HLA class I histocompatibility antigen B-59 alpha chain OS=Homo sapiens OX=9606 GN=HLA-B PE=1 SV=1:sp|P30475|1B39_HUMAN HLA class I histocompatibility antigen B-39 alpha chain OS=Homo sapiens OX=9606 GN=HLA-B PE=1 SV=1:sp|Q29836|1B67_HUMAN HLA class I histocompatibility antigen B-67 alpha chain OS=Homo sapiens OX=9606 GN=HLA-B PE=1 SV=1:sp|Q95365|1B38_HUMAN HLA class I histoc…			PEAKS DB
DGKDYIALNEDLSS	34.77	1538.71	14	0.4	770.362	2	46.68	264000	31	998595	F31:16843	No	FL1189b_IPP114_PB_CB_vivax_6_even.raw	sp|Q29940|1B59_HUMAN HLA class I histocompatibility antigen B-59 alpha chain OS=Homo sapiens OX=9606 GN=HLA-B PE=1 SV=1:sp|P30475|1B39_HUMAN HLA class I histocompatibility antigen B-39 alpha chain OS=Homo sapiens OX=9606 GN=HLA-B PE=1 SV=1:sp|Q29836|1B67_HUMAN HLA class I histocompatibility antigen B-67 alpha chain OS=Homo sapiens OX=9606 GN=HLA-B PE=1 SV=1:sp|Q95365|1B38_HUMAN HLA class I histoc…			PEAKS DB
DGKDYLALNEDLR	25.73	1520.75	13	-0.1	761.381	2	41.82	135000	31	996996	F31:15099	No	FL1189b_IPP114_PB_CB_vivax_6_even.raw	sp|P17693|HLAG_HUMAN HLA class I histocompatibility antigen alpha chain G OS=Homo sapiens OX=9606 GN=HLA-G PE=1 SV=1			PEAKS DB
DGKDYLALNEDLRS	25.62	1607.78	14	-0.4	536.933	3	41.62	271000	31	996928	F31:15037	No	FL1189b_IPP114_PB_CB_vivax_6_even.raw	sp|P17693|HLAG_HUMAN HLA class I histocompatibility antigen alpha chain G OS=Homo sapiens OX=9606 GN=HLA-G PE=1 SV=1			PEAKS DB
DGNGKKFNKKPF	15.93	1378.74	12	1.7	460.587	3	25.44	270000	14	884099	F14:9676	No	FL1029_IPP114_PB_CB_vivax_8_odd.raw	tr|A5K7V6|A5K7V6_PLAVS RRM domain-containing protein OS=Plasmodium vivax (strain Salvador I) OX=126793 GN=PVX_082480 PE=4 SV=1			PEAKS DB
DGPSHSDSW	23.68	986.373	9	-1.7	494.193	2	44.96		5	778821	F5:17240	No	FL1029_IPP114_PB_CB_vivax_3_even.raw	sp|Q6UXF1|TM108_HUMAN Transmembrane protein 108 OS=Homo sapiens OX=9606 GN=TMEM108 PE=2 SV=2			PEAKS DB
DGPVRGIDF	25.49	974.482	9	-0.5	488.248	2	45.74	459000	31	998287	F31:16494	No	FL1189b_IPP114_PB_CB_vivax_6_even.raw	sp|P53621|COPA_HUMAN Coatomer subunit alpha OS=Homo sapiens OX=9606 GN=COPA PE=1 SV=2			PEAKS DB
DGPVVTDPKAPNVV	35.87	1406.74	14	-0.2	704.377	2	41.88	324000	32	1017394	F32:15132	No	FL1189b_IPP114_PB_CB_vivax_6_odd.raw	sp|P52566|GDIR2_HUMAN Rho GDP-dissociation inhibitor 2 OS=Homo sapiens OX=9606 GN=ARHGDIB PE=1 SV=3			PEAKS DB
DGPVVTDPKAPNVVV	41.86	1505.81	15	-0.4	753.911	2	45.14	267000	31	998089	F31:16278	No	FL1189b_IPP114_PB_CB_vivax_6_even.raw	sp|P52566|GDIR2_HUMAN Rho GDP-dissociation inhibitor 2 OS=Homo sapiens OX=9606 GN=ARHGDIB PE=1 SV=3			PEAKS DB
DGPVVTDPKAPNVVVT	32.07	1606.86	16	-1.1	804.435	2	43.68	132000	31	997611	F31:15771	No	FL1189b_IPP114_PB_CB_vivax_6_even.raw	sp|P52566|GDIR2_HUMAN Rho GDP-dissociation inhibitor 2 OS=Homo sapiens OX=9606 GN=ARHGDIB PE=1 SV=3			PEAKS DB
DGRFNILIVVKD	15.33	1387.78	12	-1.4	694.898	2	19.38	123000	13	967513	F13:7360	No	FL1029_IPP114_PB_CB_vivax_8_even.raw	tr|A5K4I3|A5K4I3_PLAVS Ubiquitin C-terminal hydrolase family 1 putative OS=Plasmodium vivax (strain Salvador I) OX=126793 GN=PVX_091485 PE=4 SV=1			PEAKS DB
DGSGGDGGENNSPEEEGKND	38.17	1962.73	20	2	982.375	2	24.39	194000	5	771434	F5:9251	No	FL1029_IPP114_PB_CB_vivax_3_even.raw	tr|A5KE19|A5KE19_PLAVS Merozoite capping protein 1 putative OS=Plasmodium vivax (strain Salvador I) OX=126793 GN=PVX_111355 PE=4 SV=1			PEAKS DB
DGSR(+.98)HPTSHHED	24.41	1374.55	12	0.8	688.285	2	19.67	521000	9	724882	F9:7446	No	FL1029_IPP114_PB_CB_vivax_6_even.raw	sp|P20930|FILA_HUMAN Filaggrin OS=Homo sapiens OX=9606 GN=FLG PE=1 SV=3	Deamidation (R)	R4:Deamidation (R):1000.00	PEAKS PTM
DGSRHPR(+.98)SHHED	30.32	1429.61	12	0.2	477.543	3	19.61		9	724864	F9:7417	No	FL1029_IPP114_PB_CB_vivax_6_even.raw	sp|P20930|FILA_HUMAN Filaggrin OS=Homo sapiens OX=9606 GN=FLG PE=1 SV=3	Deamidation (R)	R7:Deamidation (R):38.16	PEAKS PTM
DGTPIEK	16.53	758.381	7	-0.4	380.198	2	25.38	127000	7	794247	F7:9638	No	FL1029_IPP114_PB_CB_vivax_4_even.raw	tr|A5JZN9|A5JZN9_PLAVS 60S ribosomal protein L13 putative OS=Plasmodium vivax (strain Salvador I) OX=126793 GN=PVX_123070 PE=3 SV=1			PEAKS DB
DGYVVKETI	29.58	1022.53	9	-0.2	512.271	2	38.88	313000	12	686833	F12:14859	No	FL1029_IPP114_PB_CB_vivax_7_odd.raw	sp|Q15418|KS6A1_HUMAN Ribosomal protein S6 kinase alpha-1 OS=Homo sapiens OX=9606 GN=RPS6KA1 PE=1 SV=2			PEAKS DB
DHDAVLRFNGAPTAN	17.38	1596.76	15	0.6	533.262	3	38.68	174000	32	1016353	F32:14000	No	FL1189b_IPP114_PB_CB_vivax_6_odd.raw	sp|P15907|SIAT1_HUMAN Beta-galactoside alpha-2 6-sialyltransferase 1 OS=Homo sapiens OX=9606 GN=ST6GAL1 PE=1 SV=1			PEAKS DB
DHDAVLRFNGAPTANFQ	32.79	1871.89	17	-0.7	624.971	3	44.45	1200000	32	1018253	F32:16080	No	FL1189b_IPP114_PB_CB_vivax_6_odd.raw	sp|P15907|SIAT1_HUMAN Beta-galactoside alpha-2 6-sialyltransferase 1 OS=Homo sapiens OX=9606 GN=ST6GAL1 PE=1 SV=1			PEAKS DB
DHLDIDHNKKID	23.26	1461.72	12	2.4	488.249	3	27.16	179000	11	637849	F11:10324	No	FL1029_IPP114_PB_CB_vivax_7_even.raw	sp|P20930|FILA_HUMAN Filaggrin OS=Homo sapiens OX=9606 GN=FLG PE=1 SV=3			PEAKS DB
DIAQKSKAEAES	31.58	1275.63	12	1.1	638.823	2	24.67	182000	11	636953	F11:9361	No	FL1029_IPP114_PB_CB_vivax_7_even.raw	sp|P04264|K2C1_HUMAN Keratin type II cytoskeletal 1 OS=Homo sapiens OX=9606 GN=KRT1 PE=1 SV=6			PEAKS DB
DIDHNKKID	28.37	1096.55	9	-0.7	366.524	3	23.32	556000	11	636470	F11:8847	No	FL1029_IPP114_PB_CB_vivax_7_even.raw	sp|P20930|FILA_HUMAN Filaggrin OS=Homo sapiens OX=9606 GN=FLG PE=1 SV=3			PEAKS DB
DIDHNKKIDFTEF	15.92	1620.78	13	0.5	541.267	3	39.78	376000	12	687162	F12:15214	No	FL1029_IPP114_PB_CB_vivax_7_odd.raw	sp|P20930|FILA_HUMAN Filaggrin OS=Homo sapiens OX=9606 GN=FLG PE=1 SV=3			PEAKS DB
DIEVDGKQVELA	16.17	1314.67	12	-0.8	658.34	2	46.01	106000	31	998374	F31:16604	No	FL1189b_IPP114_PB_CB_vivax_6_even.raw	sp|P62745|RHOB_HUMAN Rho-related GTP-binding protein RhoB OS=Homo sapiens OX=9606 GN=RHOB PE=1 SV=1:sp|P61586|RHOA_HUMAN Transforming protein RhoA OS=Homo sapiens OX=9606 GN=RHOA PE=1 SV=1:sp|P08134|RHOC_HUMAN Rho-related GTP-binding protein RhoC OS=Homo sapiens OX=9606 GN=RHOC PE=1 SV=1			PEAKS DB
DIGFIKLD	21.16	919.501	8	0.1	460.758	2	50.39		2	758201	F2:19310	No	FL1029_IPP114_PB_CB_vivax_1_odd.raw	sp|P62273|RS29_HUMAN 40S ribosomal protein S29 OS=Homo sapiens OX=9606 GN=RPS29 PE=1 SV=2			PEAKS DB
DIHHKVLSL	18.92	1060.6	9	1.9	531.31	2	33.11	162000	12	684821	F12:12633	No	FL1029_IPP114_PB_CB_vivax_7_odd.raw	sp|Q9UN86|G3BP2_HUMAN Ras GTPase-activating protein-binding protein 2 OS=Homo sapiens OX=9606 GN=G3BP2 PE=1 SV=2			PEAKS DB
DIKIRLENE	21.95	1128.61	9	3	565.316	2	36.26	186000	12	685907	F12:13865	No	FL1029_IPP114_PB_CB_vivax_7_odd.raw	sp|P13645|K1C10_HUMAN Keratin type I cytoskeletal 10 OS=Homo sapiens OX=9606 GN=KRT10 PE=1 SV=6			PEAKS DB
DIM(+15.99)RVNVDKVLERDQKL	37.24	2086.12	17	-0.1	522.537	4	38.29	1410000	30	930636	F30:13827	No	FL1189_IPP114_PB_CB_vivax_6_odd.raw	sp|P63027|VAMP2_HUMAN Vesicle-associated membrane protein 2 OS=Homo sapiens OX=9606 GN=VAMP2 PE=1 SV=3:sp|Q15836|VAMP3_HUMAN Vesicle-associated membrane protein 3 OS=Homo sapiens OX=9606 GN=VAMP3 PE=1 SV=3	Oxidation (M)	M3:Oxidation (M):1000.00	PEAKS PTM
DINTDGAVNFQEF	38.29	1468.65	13	-0.3	735.331	2	50.17	781000	31	999740	F31:18081	No	FL1189b_IPP114_PB_CB_vivax_6_even.raw	sp|P05109|S10A8_HUMAN Protein S100-A8 OS=Homo sapiens OX=9606 GN=S100A8 PE=1 SV=1			PEAKS DB
DIRKDLYANT	19.43	1207.62	10	1.5	604.818	2	34.68	276000	12	685357	F12:13243	No	FL1029_IPP114_PB_CB_vivax_7_odd.raw	sp|P63261|ACTG_HUMAN Actin cytoplasmic 2 OS=Homo sapiens OX=9606 GN=ACTG1 PE=1 SV=1:sp|P60709|ACTB_HUMAN Actin cytoplasmic 1 OS=Homo sapiens OX=9606 GN=ACTB PE=1 SV=1:sp|Q562R1|ACTBL_HUMAN Beta-actin-like protein 2 OS=Homo sapiens OX=9606 GN=ACTBL2 PE=1 SV=2			PEAKS DB
DIVADHVASYG	36.53	1145.54	11	-0.8	573.774	2	40.55	1570000	32	1016949	F32:14640	No	FL1189b_IPP114_PB_CB_vivax_6_odd.raw	sp|P01909|DQA1_HUMAN HLA class II histocompatibility antigen DQ alpha 1 chain OS=Homo sapiens OX=9606 GN=HLA-DQA1 PE=1 SV=1:sp|P01906|DQA2_HUMAN HLA class II histocompatibility antigen DQ alpha 2 chain OS=Homo sapiens OX=9606 GN=HLA-DQA2 PE=1 SV=2			PEAKS DB
DIVADHVASYGV	36.27	1244.6	12	-0.9	623.308	2	45.67	658000	31	998263	F31:16470	No	FL1189b_IPP114_PB_CB_vivax_6_even.raw	sp|P01909|DQA1_HUMAN HLA class II histocompatibility antigen DQ alpha 1 chain OS=Homo sapiens OX=9606 GN=HLA-DQA1 PE=1 SV=1:sp|P01906|DQA2_HUMAN HLA class II histocompatibility antigen DQ alpha 2 chain OS=Homo sapiens OX=9606 GN=HLA-DQA2 PE=1 SV=2			PEAKS DB
DIVADHVASYGVN	21.27	1358.65	13	0.6	680.331	2	38.42	156000	32	1016261	F32:13897	No	FL1189b_IPP114_PB_CB_vivax_6_odd.raw	sp|P01909|DQA1_HUMAN HLA class II histocompatibility antigen DQ alpha 1 chain OS=Homo sapiens OX=9606 GN=HLA-DQA1 PE=1 SV=1:sp|P01906|DQA2_HUMAN HLA class II histocompatibility antigen DQ alpha 2 chain OS=Homo sapiens OX=9606 GN=HLA-DQA2 PE=1 SV=2			PEAKS DB
DIVADHVASYGVN(+.98)	40.95	1359.63	13	-0.1	680.822	2	44.29	521000	32	1018198	F32:16009	No	FL1189b_IPP114_PB_CB_vivax_6_odd.raw	sp|P01909|DQA1_HUMAN HLA class II histocompatibility antigen DQ alpha 1 chain OS=Homo sapiens OX=9606 GN=HLA-DQA1 PE=1 SV=1:sp|P01906|DQA2_HUMAN HLA class II histocompatibility antigen DQ alpha 2 chain OS=Homo sapiens OX=9606 GN=HLA-DQA2 PE=1 SV=2	Deamidation (NQ)	N13:Deamidation (NQ):1000.00	PEAKS PTM
DIVYSLKRQG	18.05	1177.65	10	0.4	589.83	2	33.54	111000	12	684971	F12:12836	No	FL1029_IPP114_PB_CB_vivax_7_odd.raw	tr|A5K474|A5K474_PLAVS Histone H4 OS=Plasmodium vivax (strain Salvador I) OX=126793 GN=PVX_090930 PE=3 SV=1			PEAKS DB
DKEKKQLY	31	1050.57	8	0.6	526.293	2	24.2	753000	14	883667	F14:9196	No	FL1029_IPP114_PB_CB_vivax_8_odd.raw	tr|A5K303|A5K303_PLAVS 60S ribosomal protein L23a putative OS=Plasmodium vivax (strain Salvador I) OX=126793 GN=PVX_116700 PE=3 SV=1			PEAKS DB
DKIRYEAI	18.17	1006.54	8	1.6	504.28	2	33.02	826000	12	684785	F12:12628	No	FL1029_IPP114_PB_CB_vivax_7_odd.raw	tr|A5KA88|A5KA88_PLAVS Heat shock protein 86 putative OS=Plasmodium vivax (strain Salvador I) OX=126793 GN=PVX_087950 PE=3 SV=1			PEAKS DB
DKKAPAKPQKEDAKGGKKKK	36.75	2179.28	20	1	727.435	3	19.68	1620000	8	702411	F8:7478	No	FL1029_IPP114_PB_CB_vivax_4_odd.raw	tr|A5K858|A5K858_PLAVS 40S ribosomal protein S6 putative OS=Plasmodium vivax (strain Salvador I) OX=126793 GN=PVX_083000 PE=4 SV=1			PEAKS DB
DKKDDKKVKKNILK	25.2	1699.04	14	0.8	567.353	3	22.46	736000	14	883049	F14:8479	No	FL1029_IPP114_PB_CB_vivax_8_odd.raw	tr|A5K197|A5K197_PLAVS Sperm-specific protein Don juan putative OS=Plasmodium vivax (strain Salvador I) OX=126793 GN=PVX_085790 PE=4 SV=1			PEAKS DB
DKKPAAKGKATPRSKAKKR	26.15	2065.26	19	1	517.323	4	19.8		14	882109	F14:7513	No	FL1029_IPP114_PB_CB_vivax_8_odd.raw	tr|A5KBT1|A5KBT1_PLAVS Replication factor C subunit 1 OS=Plasmodium vivax (strain Salvador I) OX=126793 GN=PVX_002575 PE=3 SV=1			PEAKS DB
DKKVKKNILK	25.18	1212.79	10	-0.7	405.271	3	21.85	3860000	14	882873	F14:8307	No	FL1029_IPP114_PB_CB_vivax_8_odd.raw	tr|A5K197|A5K197_PLAVS Sperm-specific protein Don juan putative OS=Plasmodium vivax (strain Salvador I) OX=126793 GN=PVX_085790 PE=4 SV=1			PEAKS DB
DKKVKKNILKTQKTKK	16.64	1927.23	16	2.4	643.419	3	22.93	434000	14	883203	F14:8641	No	FL1029_IPP114_PB_CB_vivax_8_odd.raw	tr|A5K197|A5K197_PLAVS Sperm-specific protein Don juan putative OS=Plasmodium vivax (strain Salvador I) OX=126793 GN=PVX_085790 PE=4 SV=1			PEAKS DB
DKLGKKKGADKEKKQLY	21.87	1976.14	17	1.6	659.722	3	23.9	537000	14	883557	F14:9066	No	FL1029_IPP114_PB_CB_vivax_8_odd.raw	tr|A5K303|A5K303_PLAVS 60S ribosomal protein L23a putative OS=Plasmodium vivax (strain Salvador I) OX=126793 GN=PVX_116700 PE=3 SV=1			PEAKS DB
DKQKKAPEMKN(+.98)K(+14.02)NAQLTK	19.71	2114.15	18	0.6	1058.08	2	21.19		13	968149	F13:8032	No	FL1029_IPP114_PB_CB_vivax_8_even.raw	tr|A5K197|A5K197_PLAVS Sperm-specific protein Don juan putative OS=Plasmodium vivax (strain Salvador I) OX=126793 GN=PVX_085790 PE=4 SV=1	Deamidation (NQ); Methylation(KR)	N11:Deamidation (NQ):11.10;K12:Methylation(KR):0.00	PEAKS PTM
DKSYLAYKTLR	22.44	1356.74	11	-0.4	453.254	3	32.87	229000	32	1014422	F32:11899	No	FL1189b_IPP114_PB_CB_vivax_6_odd.raw	tr|A5JZN9|A5JZN9_PLAVS 60S ribosomal protein L13 putative OS=Plasmodium vivax (strain Salvador I) OX=126793 GN=PVX_123070 PE=3 SV=1			PEAKS DB
DKVLERDQKLSELD	22.01	1686.88	14	0.4	563.3	3	33.7	267000	30	929134	F30:12190	No	FL1189_IPP114_PB_CB_vivax_6_odd.raw	sp|P63027|VAMP2_HUMAN Vesicle-associated membrane protein 2 OS=Homo sapiens OX=9606 GN=VAMP2 PE=1 SV=3:sp|Q15836|VAMP3_HUMAN Vesicle-associated membrane protein 3 OS=Homo sapiens OX=9606 GN=VAMP3 PE=1 SV=3:sp|P23763|VAMP1_HUMAN Vesicle-associated membrane protein 1 OS=Homo sapiens OX=9606 GN=VAMP1 PE=1 SV=1			PEAKS DB
DKVLERDQKLSELDDR	31.53	1958.01	16	-0.5	490.509	4	31.81	224000	32	1014077	F32:11500	No	FL1189b_IPP114_PB_CB_vivax_6_odd.raw	sp|P63027|VAMP2_HUMAN Vesicle-associated membrane protein 2 OS=Homo sapiens OX=9606 GN=VAMP2 PE=1 SV=3:sp|Q15836|VAMP3_HUMAN Vesicle-associated membrane protein 3 OS=Homo sapiens OX=9606 GN=VAMP3 PE=1 SV=3:sp|P23763|VAMP1_HUMAN Vesicle-associated membrane protein 1 OS=Homo sapiens OX=9606 GN=VAMP1 PE=1 SV=1			PEAKS DB
DLAGRDLTDY	28.88	1137.53	10	0.4	569.773	2	41.64	1000000	11	643010	F11:15871	No	FL1029_IPP114_PB_CB_vivax_7_even.raw	sp|P63261|ACTG_HUMAN Actin cytoplasmic 2 OS=Homo sapiens OX=9606 GN=ACTG1 PE=1 SV=1:sp|P60709|ACTB_HUMAN Actin cytoplasmic 1 OS=Homo sapiens OX=9606 GN=ACTB PE=1 SV=1:sp|P68032|ACTC_HUMAN Actin alpha cardiac muscle 1 OS=Homo sapiens OX=9606 GN=ACTC1 PE=1 SV=1:sp|P62736|ACTA_HUMAN Actin aortic smooth muscle OS=Homo sapiens OX=9606 GN=ACTA2 PE=1 SV=1:sp|P68133|ACTS_HUMAN Actin alpha skeletal muscle…			PEAKS DB
DLEM(+15.99)QIE	22.69	892.385	7	1	893.393	1	42.29	392000	10	665753	F10:16122	No	FL1029_IPP114_PB_CB_vivax_6_odd.raw	sp|P13645|K1C10_HUMAN Keratin type I cytoskeletal 10 OS=Homo sapiens OX=9606 GN=KRT10 PE=1 SV=6	Oxidation (M)	M4:Oxidation (M):1000.00	PEAKS PTM
DLHQRFSSL	16.25	1101.56	9	-0.6	551.785	2	31.1	197000	12	684077	F12:11881	No	FL1029_IPP114_PB_CB_vivax_7_odd.raw	sp|Q9Y6C5|PTC2_HUMAN Protein patched homolog 2 OS=Homo sapiens OX=9606 GN=PTCH2 PE=1 SV=2			PEAKS DB
DLKEKKEVV	25.73	1086.63	9	1.2	544.322	2	25.61	782000	11	637289	F11:9722	No	FL1029_IPP114_PB_CB_vivax_7_even.raw	sp|P06454|PTMA_HUMAN Prothymosin alpha OS=Homo sapiens OX=9606 GN=PTMA PE=1 SV=2			PEAKS DB
DLNEVPVKELA	28.65	1225.66	11	0.4	613.835	2	45.7	160000	31	998276	F31:16496	No	FL1189b_IPP114_PB_CB_vivax_6_even.raw	sp|Q96AG4|LRC59_HUMAN Leucine-rich repeat-containing protein 59 OS=Homo sapiens OX=9606 GN=LRRC59 PE=1 SV=1			PEAKS DB
DLNFHVFLEYNQDLSVR	28.38	2108.03	17	-0.7	703.684	3	50.26	266000	3	870516	F3:19251	No	FL1029_IPP114_PB_CB_vivax_2_even.raw	sp|Q9UNH7|SNX6_HUMAN Sorting nexin-6 OS=Homo sapiens OX=9606 GN=SNX6 PE=1 SV=1			PEAKS DB
DLQKSHSKPPGD	17.82	1307.65	12	-4.2	654.828	2	19.71	7870000	14	882077	F14:7487	No	FL1029_IPP114_PB_CB_vivax_8_odd.raw	sp|Q70Z35|PREX2_HUMAN Phosphatidylinositol 3 4 5-trisphosphate-dependent Rac exchanger 2 protein OS=Homo sapiens OX=9606 GN=PREX2 PE=1 SV=1			PEAKS DB
DLRNVSTGDVN	27.7	1188.57	11	3	595.296	2	33.71	326000	14	887037	F14:12852	No	FL1029_IPP114_PB_CB_vivax_8_odd.raw	sp|P13645|K1C10_HUMAN Keratin type I cytoskeletal 10 OS=Homo sapiens OX=9606 GN=KRT10 PE=1 SV=6			PEAKS DB
DLYANTVLSGGTTM(+15.99)YPGIADR	49.21	2230.06	21	0.7	1116.04	2	49.25	549000	14	892574	F14:18837	No	FL1029_IPP114_PB_CB_vivax_8_odd.raw	sp|P63261|ACTG_HUMAN Actin cytoplasmic 2 OS=Homo sapiens OX=9606 GN=ACTG1 PE=1 SV=1:sp|P60709|ACTB_HUMAN Actin cytoplasmic 1 OS=Homo sapiens OX=9606 GN=ACTB PE=1 SV=1	Oxidation (M)	M14:Oxidation (M):1000.00	PEAKS PTM
DNEFGYSNRVVD	19.29	1413.62	12	-1.1	707.815	2	39.35	53600	10	664729	F10:15021	No	FL1029_IPP114_PB_CB_vivax_6_odd.raw	sp|P04406|G3P_HUMAN Glyceraldehyde-3-phosphate dehydrogenase OS=Homo sapiens OX=9606 GN=GAPDH PE=1 SV=3			PEAKS DB
DNIQGITKPAIR	15.28	1324.75	12	0	663.38	2	34.51	38900	32	1014967	F32:12506	No	FL1189b_IPP114_PB_CB_vivax_6_odd.raw	sp|P62805|H4_HUMAN Histone H4 OS=Homo sapiens OX=9606 GN=HIST1H4A PE=1 SV=2:tr|A5K474|A5K474_PLAVS Histone H4 OS=Plasmodium vivax (strain Salvador I) OX=126793 GN=PVX_090930 PE=3 SV=1			PEAKS DB
DNKGIDSDASYPYK	15.65	1571.71	14	-0.3	524.911	3	33.2	69100	32	1014537	F32:12022	No	FL1189b_IPP114_PB_CB_vivax_6_odd.raw	sp|P25774|CATS_HUMAN Cathepsin S OS=Homo sapiens OX=9606 GN=CTSS PE=1 SV=3			PEAKS DB
DNKGIDSDASYPYKA	44.75	1642.75	15	0	822.381	2	34.61	649000	32	1014995	F32:12511	No	FL1189b_IPP114_PB_CB_vivax_6_odd.raw	sp|P25774|CATS_HUMAN Cathepsin S OS=Homo sapiens OX=9606 GN=CTSS PE=1 SV=3			PEAKS DB
DNKGIDSDASYPYKAM(+15.99)D	22.58	1904.81	17	-0.5	635.943	3	34.56	742000	31	994620	F31:12470	No	FL1189b_IPP114_PB_CB_vivax_6_even.raw	sp|P25774|CATS_HUMAN Cathepsin S OS=Homo sapiens OX=9606 GN=CTSS PE=1 SV=3	Oxidation (M)	M16:Oxidation (M):1000.00	PEAKS PTM
DNKGIDSDASYPYKAMD	18.42	1888.81	17	0.1	630.612	3	38.51	186000	29	910367	F29:13925	No	FL1189_IPP114_PB_CB_vivax_6_even.raw	sp|P25774|CATS_HUMAN Cathepsin S OS=Homo sapiens OX=9606 GN=CTSS PE=1 SV=3			PEAKS DB
DNKKAKKVGDKRKGR	26.46	1727.03	15	0.1	576.683	3	19.64	1020000	8	702391	F8:7473	No	FL1029_IPP114_PB_CB_vivax_4_odd.raw	tr|A5KAB1|A5KAB1_PLAVS 60S ribosomal protein L34-A putative OS=Plasmodium vivax (strain Salvador I) OX=126793 GN=PVX_088065 PE=4 SV=1			PEAKS DB
DNNEHVVQ(+.98)EKTVSF	45.92	1645.76	14	0.9	823.887	2	36.49	371000	14	888023	F14:13917	No	FL1029_IPP114_PB_CB_vivax_8_odd.raw	tr|A5JZN7|A5JZN7_PLAVS Alba domain-containing protein OS=Plasmodium vivax (strain Salvador I) OX=126793 GN=PVX_123060 PE=4 SV=1	Deamidation (NQ)	Q8:Deamidation (NQ):41.96	PEAKS PTM
DNNEHVVQEKTV	20.13	1410.67	12	0.7	706.345	2	28.55	149000	32	1012991	F32:10331	No	FL1189b_IPP114_PB_CB_vivax_6_odd.raw	tr|A5JZN7|A5JZN7_PLAVS Alba domain-containing protein OS=Plasmodium vivax (strain Salvador I) OX=126793 GN=PVX_123060 PE=4 SV=1			PEAKS DB
DNNEHVVQEKTVSF	37.08	1644.77	14	0.5	549.266	3	36.56	566000	32	1015650	F32:13221	No	FL1189b_IPP114_PB_CB_vivax_6_odd.raw	tr|A5JZN7|A5JZN7_PLAVS Alba domain-containing protein OS=Plasmodium vivax (strain Salvador I) OX=126793 GN=PVX_123060 PE=4 SV=1			PEAKS DB
DNNRSLDLD	23.11	1060.48	9	0.4	531.247	2	34.54	515000	10	663069	F10:13167	No	FL1029_IPP114_PB_CB_vivax_6_odd.raw	sp|P04264|K2C1_HUMAN Keratin type II cytoskeletal 1 OS=Homo sapiens OX=9606 GN=KRT1 PE=1 SV=6:sp|P12035|K2C3_HUMAN Keratin type II cytoskeletal 3 OS=Homo sapiens OX=9606 GN=KRT3 PE=1 SV=3:sp|Q7Z794|K2C1B_HUMAN Keratin type II cytoskeletal 1b OS=Homo sapiens OX=9606 GN=KRT77 PE=2 SV=3			PEAKS DB
DNQIHEADTTENQSGV	23.29	1756.75	16	-0.6	879.382	2	32.73		29	908462	F29:11846	No	FL1189_IPP114_PB_CB_vivax_6_even.raw	sp|P05023|AT1A1_HUMAN Sodium/potassium-transporting ATPase subunit alpha-1 OS=Homo sapiens OX=9606 GN=ATP1A1 PE=1 SV=1			PEAKS DB
DNQIHEADTTENQSGVS	29.83	1843.78	17	-1.1	922.897	2	31.05	396000	32	1013813	F32:11223	No	FL1189b_IPP114_PB_CB_vivax_6_odd.raw	sp|P05023|AT1A1_HUMAN Sodium/potassium-transporting ATPase subunit alpha-1 OS=Homo sapiens OX=9606 GN=ATP1A1 PE=1 SV=1			PEAKS DB
DNSRNLDLD	17.85	1060.48	9	-0.4	531.246	2	33.9	334000	10	662831	F10:12920	No	FL1029_IPP114_PB_CB_vivax_6_odd.raw	sp|P35908|K22E_HUMAN Keratin type II cytoskeletal 2 epidermal OS=Homo sapiens OX=9606 GN=KRT2 PE=1 SV=2			PEAKS DB
DPPLIALDKDAPLR	18.73	1532.86	14	0.3	511.959	3	46.74	193000	30	933444	F30:16913	No	FL1189_IPP114_PB_CB_vivax_6_odd.raw	sp|O94985|CSTN1_HUMAN Calsyntenin-1 OS=Homo sapiens OX=9606 GN=CLSTN1 PE=1 SV=1			PEAKS DB
DPYEVSYRI	27.58	1140.55	9	1.4	571.281	2	43.35	176000	11	643610	F11:16543	No	FL1029_IPP114_PB_CB_vivax_7_even.raw	sp|P78543|BTG2_HUMAN Protein BTG2 OS=Homo sapiens OX=9606 GN=BTG2 PE=1 SV=1:sp|P62324|BTG1_HUMAN Protein BTG1 OS=Homo sapiens OX=9606 GN=BTG1 PE=1 SV=1			PEAKS DB
DRDHDRRLD	30.91	1196.56	9	-1.4	399.862	3	21.44	641000	14	882680	F14:8141	No	FL1029_IPP114_PB_CB_vivax_8_odd.raw	sp|Q5D862|FILA2_HUMAN Filaggrin-2 OS=Homo sapiens OX=9606 GN=FLG2 PE=1 SV=1			PEAKS DB
DRDNNRVGFAEAAR	23.98	1589.77	14	0.1	530.929	3	28.26	661000	14	885105	F14:10757	No	FL1029_IPP114_PB_CB_vivax_8_odd.raw	sp|P07339|CATD_HUMAN Cathepsin D OS=Homo sapiens OX=9606 GN=CTSD PE=1 SV=1			PEAKS DB
DRNTQIFKTNTQTYRE	20.52	2013.99	16	-0.2	672.336	3	32.14	364000	32	1014181	F32:11622	No	FL1189b_IPP114_PB_CB_vivax_6_odd.raw	sp|Q29940|1B59_HUMAN HLA class I histocompatibility antigen B-59 alpha chain OS=Homo sapiens OX=9606 GN=HLA-B PE=1 SV=1:sp|P30491|1B53_HUMAN HLA class I histocompatibility antigen B-53 alpha chain OS=Homo sapiens OX=9606 GN=HLA-B PE=1 SV=1:sp|P18464|1B51_HUMAN HLA class I histocompatibility antigen B-51 alpha chain OS=Homo sapiens OX=9606 GN=HLA-B PE=1 SV=1:sp|P30685|1B35_HUMAN HLA class I histoc…			PEAKS DB
DRNTQIFKTNTQTYREN	35.78	2128.03	17	0.2	710.351	3	31.68	1950000	32	1014029	F32:11451	No	FL1189b_IPP114_PB_CB_vivax_6_odd.raw	sp|Q29940|1B59_HUMAN HLA class I histocompatibility antigen B-59 alpha chain OS=Homo sapiens OX=9606 GN=HLA-B PE=1 SV=1:sp|P30491|1B53_HUMAN HLA class I histocompatibility antigen B-53 alpha chain OS=Homo sapiens OX=9606 GN=HLA-B PE=1 SV=1:sp|P18464|1B51_HUMAN HLA class I histocompatibility antigen B-51 alpha chain OS=Homo sapiens OX=9606 GN=HLA-B PE=1 SV=1			PEAKS DB
DRNTQIFKTNTQTYRENL	22.63	2241.11	18	-0.4	748.045	3	36.43	347000	31	995234	F31:13151	No	FL1189b_IPP114_PB_CB_vivax_6_even.raw	sp|Q29940|1B59_HUMAN HLA class I histocompatibility antigen B-59 alpha chain OS=Homo sapiens OX=9606 GN=HLA-B PE=1 SV=1:sp|P30491|1B53_HUMAN HLA class I histocompatibility antigen B-53 alpha chain OS=Homo sapiens OX=9606 GN=HLA-B PE=1 SV=1:sp|P18464|1B51_HUMAN HLA class I histocompatibility antigen B-51 alpha chain OS=Homo sapiens OX=9606 GN=HLA-B PE=1 SV=1			PEAKS DB
DSCSRDGALL	21.07	1035.47	10	-3.2	518.738	2	31.38	85600	31	993553	F31:11331	No	FL1189b_IPP114_PB_CB_vivax_6_even.raw	sp|Q6NSJ0|MYORG_HUMAN Myogenesis-regulating glycosidase OS=Homo sapiens OX=9606 GN=MYORG PE=1 SV=2			PEAKS DB
DSDLQLDRISVYYNEA	28.16	1899.88	16	-0.2	950.95	2	49.86	716000	30	934447	F30:18011	No	FL1189_IPP114_PB_CB_vivax_6_odd.raw	sp|P07437|TBB5_HUMAN Tubulin beta chain OS=Homo sapiens OX=9606 GN=TUBB PE=1 SV=2			PEAKS DB
DSDVGEYRAVT	20.31	1210.55	11	0.6	606.281	2	35.5	107000	31	994936	F31:12828	No	FL1189b_IPP114_PB_CB_vivax_6_even.raw	sp|Q30134|2B18_HUMAN HLA class II histocompatibility antigen DRB1-8 beta chain OS=Homo sapiens OX=9606 GN=HLA-DRB1 PE=1 SV=2:sp|Q9GIY3|2B1E_HUMAN HLA class II histocompatibility antigen DRB1-14 beta chain OS=Homo sapiens OX=9606 GN=HLA-DRB1 PE=1 SV=1:sp|P13760|2B14_HUMAN HLA class II histocompatibility antigen DRB1-4 beta chain OS=Homo sapiens OX=9606 GN=HLA-DRB1 PE=1 SV=1:sp|P04229|2B11_HUMAN HL…			PEAKS DB
DSEEKEEQGQKPEKV	34.85	1758.83	15	0.7	587.283	3	23.9	771000	14	883555	F14:9076	No	FL1029_IPP114_PB_CB_vivax_8_odd.raw	tr|A5K8G8|A5K8G8_PLAVS Uncharacterized protein OS=Plasmodium vivax (strain Salvador I) OX=126793 GN=PVX_083555 PE=4 SV=1			PEAKS DB
DSGDGVTHTVPIYE	20.87	1488.67	14	1.5	745.345	2	42.07	207000	11	643156	F11:16056	No	FL1029_IPP114_PB_CB_vivax_7_even.raw	sp|P63261|ACTG_HUMAN Actin cytoplasmic 2 OS=Homo sapiens OX=9606 GN=ACTG1 PE=1 SV=1:sp|P60709|ACTB_HUMAN Actin cytoplasmic 1 OS=Homo sapiens OX=9606 GN=ACTB PE=1 SV=1:sp|A5A3E0|POTEF_HUMAN POTE ankyrin domain family member F OS=Homo sapiens OX=9606 GN=POTEF PE=1 SV=2:sp|Q6S8J3|POTEE_HUMAN POTE ankyrin domain family member E OS=Homo sapiens OX=9606 GN=POTEE PE=2 SV=3			PEAKS DB
DSGDGVTHTVPIYEG	26.49	1545.69	15	1.6	773.856	2	41.9	825000	11	643105	F11:15978	No	FL1029_IPP114_PB_CB_vivax_7_even.raw	sp|P63261|ACTG_HUMAN Actin cytoplasmic 2 OS=Homo sapiens OX=9606 GN=ACTG1 PE=1 SV=1:sp|P60709|ACTB_HUMAN Actin cytoplasmic 1 OS=Homo sapiens OX=9606 GN=ACTB PE=1 SV=1:sp|A5A3E0|POTEF_HUMAN POTE ankyrin domain family member F OS=Homo sapiens OX=9606 GN=POTEF PE=1 SV=2:sp|Q6S8J3|POTEE_HUMAN POTE ankyrin domain family member E OS=Homo sapiens OX=9606 GN=POTEE PE=2 SV=3			PEAKS DB
DSHCLALSHD	16.28	1096.46	10	3.4	549.24	2	31.04	842000	3	863680	F3:13261	No	FL1029_IPP114_PB_CB_vivax_2_even.raw	sp|Q15751|HERC1_HUMAN Probable E3 ubiquitin-protein ligase HERC1 OS=Homo sapiens OX=9606 GN=HERC1 PE=1 SV=2			PEAKS DB
DSPGGEAN	15.49	745.288	8	1	746.296	1	59.03	69900	2	761205	F2:22538	No	FL1029_IPP114_PB_CB_vivax_1_odd.raw	tr|A5KBE4|A5KBE4_PLAVS Uncharacterized protein OS=Plasmodium vivax (strain Salvador I) OX=126793 GN=PVX_119765 PE=4 SV=1			PEAKS DB
DSRANAALDEPVL	19.98	1369.68	13	2.1	685.851	2	44.32	144000	11	643953	F11:16927	No	FL1029_IPP114_PB_CB_vivax_7_even.raw	tr|A5K904|A5K904_PLAVS Uncharacterized protein OS=Plasmodium vivax (strain Salvador I) OX=126793 GN=PVX_101400 PE=4 SV=1			PEAKS DB
DSRGNPTVEVD	24.5	1187.54	11	1.3	594.779	2	31.79	819000	11	639505	F11:12091	No	FL1029_IPP114_PB_CB_vivax_7_even.raw	sp|P06733|ENOA_HUMAN Alpha-enolase OS=Homo sapiens OX=9606 GN=ENO1 PE=1 SV=2:sp|P09104|ENOG_HUMAN Gamma-enolase OS=Homo sapiens OX=9606 GN=ENO2 PE=1 SV=3:sp|P13929|ENOB_HUMAN Beta-enolase OS=Homo sapiens OX=9606 GN=ENO3 PE=1 SV=5:tr|A5K7I5|A5K7I5_PLAVS Enolase putative OS=Plasmodium vivax (strain Salvador I) OX=126793 GN=PVX_095015 PE=3 SV=1			PEAKS DB
DSSEEKFLR	18.9	1109.54	9	1.5	555.776	2	31.28	159000	10	661980	F10:11932	No	FL1029_IPP114_PB_CB_vivax_6_odd.raw	sp|P02808|STAT_HUMAN Statherin OS=Homo sapiens OX=9606 GN=STATH PE=1 SV=2			PEAKS DB
DTGRPSTTV	17.52	932.456	9	1.7	467.236	2	28.31	61800	29	907008	F29:10257	No	FL1189_IPP114_PB_CB_vivax_6_even.raw	sp|Q02413|DSG1_HUMAN Desmoglein-1 OS=Homo sapiens OX=9606 GN=DSG1 PE=1 SV=2			PEAKS DB
DTGRPSTTVR	25.56	1088.56	10	-1.7	363.859	3	23.65	215000	10	659068	F10:8998	No	FL1029_IPP114_PB_CB_vivax_6_odd.raw	sp|Q02413|DSG1_HUMAN Desmoglein-1 OS=Homo sapiens OX=9606 GN=DSG1 PE=1 SV=2			PEAKS DB
DTKGFFDPNTEE	19.5	1398.59	12	1.2	700.305	2	42.83		11	643440	F11:16348	No	FL1029_IPP114_PB_CB_vivax_7_even.raw	sp|P15924|DESP_HUMAN Desmoplakin OS=Homo sapiens OX=9606 GN=DSP PE=1 SV=3:sp|Q15149|PLEC_HUMAN Plectin OS=Homo sapiens OX=9606 GN=PLEC PE=1 SV=3			PEAKS DB
DTKGFFDPNTEEN	37.32	1512.64	13	1.5	757.327	2	41.77	604000	11	643059	F11:15926	No	FL1029_IPP114_PB_CB_vivax_7_even.raw	sp|P15924|DESP_HUMAN Desmoplakin OS=Homo sapiens OX=9606 GN=DSP PE=1 SV=3:sp|Q15149|PLEC_HUMAN Plectin OS=Homo sapiens OX=9606 GN=PLEC PE=1 SV=3			PEAKS DB
DTKGFFDPNTEENL	29.68	1625.72	14	0.8	813.868	2	48.06	507000	11	645287	F11:18353	No	FL1029_IPP114_PB_CB_vivax_7_even.raw	sp|P15924|DESP_HUMAN Desmoplakin OS=Homo sapiens OX=9606 GN=DSP PE=1 SV=3:sp|Q15149|PLEC_HUMAN Plectin OS=Homo sapiens OX=9606 GN=PLEC PE=1 SV=3			PEAKS DB
DTKGPEIR	18.3	914.482	8	0.2	458.248	2	25.66	99800	30	926471	F30:9303	No	FL1189_IPP114_PB_CB_vivax_6_odd.raw	sp|P14618|KPYM_HUMAN Pyruvate kinase PKM OS=Homo sapiens OX=9606 GN=PKM PE=1 SV=4:tr|A5K2A0|A5K2A0_PLAVS Pyruvate kinase OS=Plasmodium vivax (strain Salvador I) OX=126793 GN=PVX_114445 PE=3 SV=1:sp|P30613|KPYR_HUMAN Pyruvate kinase PKLR OS=Homo sapiens OX=9606 GN=PKLR PE=1 SV=2			PEAKS DB
DTNADKQ(+.98)L	19.31	904.414	8	0.4	453.214	2	29.47		31	992933	F31:10654	No	FL1189b_IPP114_PB_CB_vivax_6_even.raw	sp|P06702|S10A9_HUMAN Protein S100-A9 OS=Homo sapiens OX=9606 GN=S100A9 PE=1 SV=1	Deamidation (NQ)	Q7:Deamidation (NQ):16.51	PEAKS PTM
DTNADKQ(+.98)LS	25.38	991.446	9	-0.6	496.73	2	27.64	126000	31	992330	F31:9990	No	FL1189b_IPP114_PB_CB_vivax_6_even.raw	sp|P06702|S10A9_HUMAN Protein S100-A9 OS=Homo sapiens OX=9606 GN=S100A9 PE=1 SV=1	Deamidation (NQ)	Q7:Deamidation (NQ):14.19	PEAKS PTM
DTNADKQ(+.98)LSF	17.04	1138.51	10	-0.6	570.264	2	42.61		29	911722	F29:15410	No	FL1189_IPP114_PB_CB_vivax_6_even.raw	sp|P06702|S10A9_HUMAN Protein S100-A9 OS=Homo sapiens OX=9606 GN=S100A9 PE=1 SV=1	Deamidation (NQ)	Q7:Deamidation (NQ):11.12	PEAKS PTM
DTNADKQL	27.95	903.43	8	0.3	452.722	2	27.69	789000	32	1012712	F32:10005	No	FL1189b_IPP114_PB_CB_vivax_6_odd.raw	sp|P06702|S10A9_HUMAN Protein S100-A9 OS=Homo sapiens OX=9606 GN=S100A9 PE=1 SV=1			PEAKS DB
DTNADKQLS	32.61	990.462	9	-0.5	496.238	2	25.86	1520000	32	1012085	F32:9339	No	FL1189b_IPP114_PB_CB_vivax_6_odd.raw	sp|P06702|S10A9_HUMAN Protein S100-A9 OS=Homo sapiens OX=9606 GN=S100A9 PE=1 SV=1			PEAKS DB
DTNADKQLSF	28.93	1137.53	10	0.2	569.773	2	40.48	228000	32	1016931	F32:14629	No	FL1189b_IPP114_PB_CB_vivax_6_odd.raw	sp|P06702|S10A9_HUMAN Protein S100-A9 OS=Homo sapiens OX=9606 GN=S100A9 PE=1 SV=1			PEAKS DB
DTNADKQLSFE	22.38	1266.57	11	-0.3	634.293	2	39.51	192000	29	910693	F29:14293	No	FL1189_IPP114_PB_CB_vivax_6_even.raw	sp|P06702|S10A9_HUMAN Protein S100-A9 OS=Homo sapiens OX=9606 GN=S100A9 PE=1 SV=1			PEAKS DB
DTNADKQLSFEE	33.79	1395.62	12	-0.2	698.815	2	39.82	810000	31	996335	F31:14357	No	FL1189b_IPP114_PB_CB_vivax_6_even.raw	sp|P06702|S10A9_HUMAN Protein S100-A9 OS=Homo sapiens OX=9606 GN=S100A9 PE=1 SV=1			PEAKS DB
DTNADKQLSFEEF	39.58	1542.68	13	-0.2	772.349	2	49.21	2250000	31	999413	F31:17719	No	FL1189b_IPP114_PB_CB_vivax_6_even.raw	sp|P06702|S10A9_HUMAN Protein S100-A9 OS=Homo sapiens OX=9606 GN=S100A9 PE=1 SV=1			PEAKS DB
DTQFVRFDSDAASP	15.89	1554.69	14	1.1	778.356	2	45.64	84300	31	998253	F31:16472	No	FL1189b_IPP114_PB_CB_vivax_6_even.raw	sp|Q29940|1B59_HUMAN HLA class I histocompatibility antigen B-59 alpha chain OS=Homo sapiens OX=9606 GN=HLA-B PE=1 SV=1:sp|P01889|1B07_HUMAN HLA class I histocompatibility antigen B-7 alpha chain OS=Homo sapiens OX=9606 GN=HLA-B PE=1 SV=3:sp|P30475|1B39_HUMAN HLA class I histocompatibility antigen B-39 alpha chain OS=Homo sapiens OX=9606 GN=HLA-B PE=1 SV=1:sp|Q29836|1B67_HUMAN HLA class I histoco…			PEAKS DB
DTQFVRFDSDAASPR	34.81	1710.8	15	0.1	571.273	3	39.82	532000	31	996334	F31:14377	No	FL1189b_IPP114_PB_CB_vivax_6_even.raw	sp|Q29940|1B59_HUMAN HLA class I histocompatibility antigen B-59 alpha chain OS=Homo sapiens OX=9606 GN=HLA-B PE=1 SV=1:sp|P01889|1B07_HUMAN HLA class I histocompatibility antigen B-7 alpha chain OS=Homo sapiens OX=9606 GN=HLA-B PE=1 SV=3:sp|P30475|1B39_HUMAN HLA class I histocompatibility antigen B-39 alpha chain OS=Homo sapiens OX=9606 GN=HLA-B PE=1 SV=1:sp|Q29836|1B67_HUMAN HLA class I histoco…			PEAKS DB
DTQFVRFDSDAASPRE	17.34	1839.84	16	-0.2	614.287	3	40.21	130000	29	910930	F29:14549	No	FL1189_IPP114_PB_CB_vivax_6_even.raw	sp|Q29940|1B59_HUMAN HLA class I histocompatibility antigen B-59 alpha chain OS=Homo sapiens OX=9606 GN=HLA-B PE=1 SV=1:sp|P01889|1B07_HUMAN HLA class I histocompatibility antigen B-7 alpha chain OS=Homo sapiens OX=9606 GN=HLA-B PE=1 SV=3:sp|P30475|1B39_HUMAN HLA class I histocompatibility antigen B-39 alpha chain OS=Homo sapiens OX=9606 GN=HLA-B PE=1 SV=1:sp|Q29836|1B67_HUMAN HLA class I histoco…			PEAKS DB
DTQFVRFDSDAASPREE	17.42	1968.88	17	-0.4	657.301	3	40.39	135000	31	996523	F31:14583	No	FL1189b_IPP114_PB_CB_vivax_6_even.raw	sp|Q29940|1B59_HUMAN HLA class I histocompatibility antigen B-59 alpha chain OS=Homo sapiens OX=9606 GN=HLA-B PE=1 SV=1:sp|P01889|1B07_HUMAN HLA class I histocompatibility antigen B-7 alpha chain OS=Homo sapiens OX=9606 GN=HLA-B PE=1 SV=3:sp|P30475|1B39_HUMAN HLA class I histocompatibility antigen B-39 alpha chain OS=Homo sapiens OX=9606 GN=HLA-B PE=1 SV=1:sp|Q29836|1B67_HUMAN HLA class I histoco…			PEAKS DB
DTQFVRFDSDAASPREEP	27.26	2065.93	18	-1.9	689.651	3	41.59	253000	31	996917	F31:15001	No	FL1189b_IPP114_PB_CB_vivax_6_even.raw	sp|Q29940|1B59_HUMAN HLA class I histocompatibility antigen B-59 alpha chain OS=Homo sapiens OX=9606 GN=HLA-B PE=1 SV=1:sp|P01889|1B07_HUMAN HLA class I histocompatibility antigen B-7 alpha chain OS=Homo sapiens OX=9606 GN=HLA-B PE=1 SV=3:sp|P30475|1B39_HUMAN HLA class I histocompatibility antigen B-39 alpha chain OS=Homo sapiens OX=9606 GN=HLA-B PE=1 SV=1:sp|Q29836|1B67_HUMAN HLA class I histoco…			PEAKS DB
DTQFVRFDSDAASPREEPR	15.53	2222.04	19	0	741.686	3	37.1	149000	31	995448	F31:13403	No	FL1189b_IPP114_PB_CB_vivax_6_even.raw	sp|Q29940|1B59_HUMAN HLA class I histocompatibility antigen B-59 alpha chain OS=Homo sapiens OX=9606 GN=HLA-B PE=1 SV=1:sp|P01889|1B07_HUMAN HLA class I histocompatibility antigen B-7 alpha chain OS=Homo sapiens OX=9606 GN=HLA-B PE=1 SV=3:sp|P30475|1B39_HUMAN HLA class I histocompatibility antigen B-39 alpha chain OS=Homo sapiens OX=9606 GN=HLA-B PE=1 SV=1:sp|Q29836|1B67_HUMAN HLA class I histoco…			PEAKS DB
DTQFVRFDSDAASPRGEP	22.33	1993.91	18	-0.6	665.644	3	41.22	170000	31	996796	F31:14871	No	FL1189b_IPP114_PB_CB_vivax_6_even.raw	sp|P30492|1B54_HUMAN HLA class I histocompatibility antigen B-54 alpha chain OS=Homo sapiens OX=9606 GN=HLA-B PE=1 SV=1:sp|Q07000|1C15_HUMAN HLA class I histocompatibility antigen Cw-15 alpha chain OS=Homo sapiens OX=9606 GN=HLA-C PE=1 SV=1:sp|P04222|1C03_HUMAN HLA class I histocompatibility antigen Cw-3 alpha chain OS=Homo sapiens OX=9606 GN=HLA-C PE=1 SV=2:sp|Q29865|1C18_HUMAN HLA class I histo…			PEAKS DB
DTQFVRFDSDAASQ	25.87	1585.7	14	-0.2	793.857	2	43.81	186000	31	997650	F31:15823	No	FL1189b_IPP114_PB_CB_vivax_6_even.raw	sp|P13746|1A11_HUMAN HLA class I histocompatibility antigen A-11 alpha chain OS=Homo sapiens OX=9606 GN=HLA-A PE=1 SV=1:sp|P04439|1A03_HUMAN HLA class I histocompatibility antigen A-3 alpha chain OS=Homo sapiens OX=9606 GN=HLA-A PE=1 SV=2:sp|P16188|1A30_HUMAN HLA class I histocompatibility antigen A-30 alpha chain OS=Homo sapiens OX=9606 GN=HLA-A PE=1 SV=2:sp|P05534|1A24_HUMAN HLA class I histoco…			PEAKS DB
DTQFVRFDSDAASQR	33.54	1741.8	15	0.2	581.608	3	38.72	1350000	31	995977	F31:13969	No	FL1189b_IPP114_PB_CB_vivax_6_even.raw	sp|P13746|1A11_HUMAN HLA class I histocompatibility antigen A-11 alpha chain OS=Homo sapiens OX=9606 GN=HLA-A PE=1 SV=1:sp|P04439|1A03_HUMAN HLA class I histocompatibility antigen A-3 alpha chain OS=Homo sapiens OX=9606 GN=HLA-A PE=1 SV=2:sp|P16188|1A30_HUMAN HLA class I histocompatibility antigen A-30 alpha chain OS=Homo sapiens OX=9606 GN=HLA-A PE=1 SV=2:sp|P05534|1A24_HUMAN HLA class I histoco…			PEAKS DB
DVDQDGRVNY	31.43	1179.52	10	2.5	590.766	2	32.86	135000	9	729773	F9:12498	No	FL1029_IPP114_PB_CB_vivax_6_even.raw	sp|Q9NZT1|CALL5_HUMAN Calmodulin-like protein 5 OS=Homo sapiens OX=9606 GN=CALML5 PE=1 SV=2			PEAKS DB
DVFLGMFLYEYAR	20.55	1622.78	13	-0.4	812.397	2	50.25		31	999779	F31:18106	No	FL1189b_IPP114_PB_CB_vivax_6_even.raw	sp|P02768|ALBU_HUMAN Serum albumin OS=Homo sapiens OX=9606 GN=ALB PE=1 SV=2			PEAKS DB
DVFYNEATGGRYVPRAI	25.29	1926.96	17	0.8	643.327	3	43.78	1090000	12	688571	F12:16735	No	FL1029_IPP114_PB_CB_vivax_7_odd.raw	tr|A5K7A8|A5K7A8_PLAVS Tubulin beta chain OS=Plasmodium vivax (strain Salvador I) OX=126793 GN=PVX_094635 PE=3 SV=1			PEAKS DB
DVGEFRAVT	25.02	992.493	9	0.1	497.254	2	40.15	176000	30	931251	F30:14524	No	FL1189_IPP114_PB_CB_vivax_6_odd.raw	sp|Q95IE3|2B1C_HUMAN HLA class II histocompatibility antigen DRB1-12 beta chain OS=Homo sapiens OX=9606 GN=HLA-DRB1 PE=1 SV=1:sp|P01912|2B13_HUMAN HLA class II histocompatibility antigen DRB1-3 chain OS=Homo sapiens OX=9606 GN=HLA-DRB1 PE=1 SV=2:sp|Q5Y7A7|2B1D_HUMAN HLA class II histocompatibility antigen DRB1-13 beta chain OS=Homo sapiens OX=9606 GN=HLA-DRB1 PE=1 SV=1:sp|P20039|2B1B_HUMAN HLA cl…			PEAKS DB
DVGPDGRLLRGHN(+.98)Q	18.59	1533.76	14	-0.9	512.262	3	31.45	643000	32	1013944	F32:11363	No	FL1189b_IPP114_PB_CB_vivax_6_odd.raw	sp|P30475|1B39_HUMAN HLA class I histocompatibility antigen B-39 alpha chain OS=Homo sapiens OX=9606 GN=HLA-B PE=1 SV=1:sp|Q29836|1B67_HUMAN HLA class I histocompatibility antigen B-67 alpha chain OS=Homo sapiens OX=9606 GN=HLA-B PE=1 SV=1:sp|Q95365|1B38_HUMAN HLA class I histocompatibility antigen B-38 alpha chain OS=Homo sapiens OX=9606 GN=HLA-B PE=1 SV=1:sp|P30480|1B42_HUMAN HLA class I histoc…	Deamidation (NQ)	N13:Deamidation (NQ):12.28	PEAKS PTM
DVHGPDWHL	35.4	1074.49	9	0.5	538.252	2	39.56	181000	8	709499	F8:15176	No	FL1029_IPP114_PB_CB_vivax_4_odd.raw	sp|Q09666|AHNK_HUMAN Neuroblast differentiation-associated protein AHNAK OS=Homo sapiens OX=9606 GN=AHNAK PE=1 SV=2			PEAKS DB
DVNVEINVAPGKD	25.48	1368.69	13	1.9	685.353	2	41.2	84200	12	687665	F12:15757	No	FL1029_IPP114_PB_CB_vivax_7_odd.raw	sp|P35527|K1C9_HUMAN Keratin type I cytoskeletal 9 OS=Homo sapiens OX=9606 GN=KRT9 PE=1 SV=3			PEAKS DB
DVRNPSVVVKR	26.57	1267.74	11	-0.4	423.586	3	28	113000	31	992448	F31:10114	No	FL1189b_IPP114_PB_CB_vivax_6_even.raw	sp|P12111|CO6A3_HUMAN Collagen alpha-3(VI) chain OS=Homo sapiens OX=9606 GN=COL6A3 PE=1 SV=5			PEAKS DB
DVVHVKDANGNSF	15.24	1400.67	13	0.6	701.342	2	33.44	95900	12	684933	F12:12789	No	FL1029_IPP114_PB_CB_vivax_7_odd.raw	sp|P62701|RS4X_HUMAN 40S ribosomal protein S4 X isoform OS=Homo sapiens OX=9606 GN=RPS4X PE=1 SV=2:sp|P22090|RS4Y1_HUMAN 40S ribosomal protein S4 Y isoform 1 OS=Homo sapiens OX=9606 GN=RPS4Y1 PE=1 SV=2:sp|Q8TD47|RS4Y2_HUMAN 40S ribosomal protein S4 Y isoform 2 OS=Homo sapiens OX=9606 GN=RPS4Y2 PE=2 SV=3			PEAKS DB
DYGHTGYGPSGGS	19.97	1253.49	13	3	627.757	2	30.55	105000	9	729038	F9:11636	No	FL1029_IPP114_PB_CB_vivax_6_even.raw	sp|Q5D862|FILA2_HUMAN Filaggrin-2 OS=Homo sapiens OX=9606 GN=FLG2 PE=1 SV=1			PEAKS DB
DYKTIAKER	16.71	1122.6	9	0.6	375.209	3	26.38	148000	32	1012260	F32:9532	No	FL1189b_IPP114_PB_CB_vivax_6_odd.raw	sp|Q9Y371|SHLB1_HUMAN Endophilin-B1 OS=Homo sapiens OX=9606 GN=SH3GLB1 PE=1 SV=1			PEAKS DB
DYNLIVIER	24.29	1133.61	9	-0.2	567.811	2	48.61	212000	32	1019613	F32:17551	No	FL1189b_IPP114_PB_CB_vivax_6_odd.raw	sp|Q13263|TIF1B_HUMAN Transcription intermediary factor 1-beta OS=Homo sapiens OX=9606 GN=TRIM28 PE=1 SV=5			PEAKS DB
DYQALRTSI	31.1	1065.55	9	0.3	533.78	2	40.68	372000	14	889504	F14:15541	No	FL1029_IPP114_PB_CB_vivax_8_odd.raw	sp|Q00610|CLH1_HUMAN Clathrin heavy chain 1 OS=Homo sapiens OX=9606 GN=CLTC PE=1 SV=5			PEAKS DB
DYSSILQKF	29.33	1099.55	9	0.8	550.785	2	50.13	362000	12	690832	F12:19198	No	FL1029_IPP114_PB_CB_vivax_7_odd.raw	sp|Q96RU3|FNBP1_HUMAN Formin-binding protein 1 OS=Homo sapiens OX=9606 GN=FNBP1 PE=1 SV=2			PEAKS DB
DYYEVLGVQR	32.99	1240.61	10	-0.4	621.311	2	46.24	375000	31	998449	F31:16675	No	FL1189b_IPP114_PB_CB_vivax_6_even.raw	sp|O75190|DNJB6_HUMAN DnaJ homolog subfamily B member 6 OS=Homo sapiens OX=9606 GN=DNAJB6 PE=1 SV=2			PEAKS DB
E(+21.98)IKILNIF	18.86	1010.58	8	-2.7	506.295	2	45.12		12	689046	F12:17274	No	FL1029_IPP114_PB_CB_vivax_7_odd.raw	sp|P02786|TFR1_HUMAN Transferrin receptor protein 1 OS=Homo sapiens OX=9606 GN=TFRC PE=1 SV=2	Sodium adduct	E1:Sodium adduct:27.33	PEAKS PTM
E(+27.99)ASGSGGGYGGGSGKSSHS	35.98	1652.67	19	1.4	827.342	2	24.09	219000	11	636766	F11:9152	No	FL1029_IPP114_PB_CB_vivax_7_even.raw	sp|P35527|K1C9_HUMAN Keratin type I cytoskeletal 9 OS=Homo sapiens OX=9606 GN=KRT9 PE=1 SV=3	Formylation	E1:Formylation:44.58	PEAKS PTM
E(+27.99)EASGSGGGYGGGSGKSSHS	36.8	1781.71	20	1.2	891.863	2	25	394000	11	637079	F11:9493	No	FL1029_IPP114_PB_CB_vivax_7_even.raw	sp|P35527|K1C9_HUMAN Keratin type I cytoskeletal 9 OS=Homo sapiens OX=9606 GN=KRT9 PE=1 SV=3	Formylation	E1:Formylation:109.25	PEAKS PTM
E(-18.01)IGSHIKHR	30.79	1057.58	9	0.3	353.533	3	21.42	580000	32	1010635	F32:7721	No	FL1189b_IPP114_PB_CB_vivax_6_odd.raw	sp|Q9Y490|TLN1_HUMAN Talin-1 OS=Homo sapiens OX=9606 GN=TLN1 PE=1 SV=3	Pyro-glu from E	E1:Pyro-glu from E:1000.00	PEAKS PTM
EAAAIIAQR	16.54	941.529	9	-0.4	471.772	2	32.51	129000	29	908381	F29:11769	No	FL1189_IPP114_PB_CB_vivax_6_even.raw	sp|Q16643|DREB_HUMAN Drebrin OS=Homo sapiens OX=9606 GN=DBN1 PE=1 SV=4			PEAKS DB
EAGGAAGSKVSEALGQGT	20.82	1588.77	18	2.2	795.394	2	34.92	193000	11	640632	F11:13279	No	FL1029_IPP114_PB_CB_vivax_7_even.raw	sp|Q6E0U4|DMKN_HUMAN Dermokine OS=Homo sapiens OX=9606 GN=DMKN PE=1 SV=3			PEAKS DB
EAGS(-18.01)HIIQR	25.29	991.52	9	0.1	496.767	2	30.48	233000	31	993271	F31:11013	No	FL1189b_IPP114_PB_CB_vivax_6_even.raw	sp|P30491|1B53_HUMAN HLA class I histocompatibility antigen B-53 alpha chain OS=Homo sapiens OX=9606 GN=HLA-B PE=1 SV=1:sp|Q07000|1C15_HUMAN HLA class I histocompatibility antigen Cw-15 alpha chain OS=Homo sapiens OX=9606 GN=HLA-C PE=1 SV=1:sp|P04222|1C03_HUMAN HLA class I histocompatibility antigen Cw-3 alpha chain OS=Homo sapiens OX=9606 GN=HLA-C PE=1 SV=2:sp|P30685|1B35_HUMAN HLA class I histo…	Dehydration	S4:Dehydration:1000.00	PEAKS PTM
EAGSHIIQR	26.61	1009.53	9	0.6	337.518	3	25.86	629000	32	1012076	F32:9335	No	FL1189b_IPP114_PB_CB_vivax_6_odd.raw	sp|P30491|1B53_HUMAN HLA class I histocompatibility antigen B-53 alpha chain OS=Homo sapiens OX=9606 GN=HLA-B PE=1 SV=1:sp|Q07000|1C15_HUMAN HLA class I histocompatibility antigen Cw-15 alpha chain OS=Homo sapiens OX=9606 GN=HLA-C PE=1 SV=1:sp|P04222|1C03_HUMAN HLA class I histocompatibility antigen Cw-3 alpha chain OS=Homo sapiens OX=9606 GN=HLA-C PE=1 SV=2:sp|P30685|1B35_HUMAN HLA class I histo…			PEAKS DB
EALHNHYTQKSLSLSPG	19.14	1880.94	17	0.3	627.987	3	32.44	318000	14	886587	F14:12388	No	FL1029_IPP114_PB_CB_vivax_8_odd.raw	sp|P0DOX5|IGG1_HUMAN Immunoglobulin gamma-1 heavy chain OS=Homo sapiens OX=9606 PE=1 SV=2:sp|P01857|IGHG1_HUMAN Immunoglobulin heavy constant gamma 1 OS=Homo sapiens OX=9606 GN=IGHG1 PE=1 SV=1:sp|P01859|IGHG2_HUMAN Immunoglobulin heavy constant gamma 2 OS=Homo sapiens OX=9606 GN=IGHG2 PE=1 SV=2			PEAKS DB
EAPLNPK	15.81	767.418	7	0.7	384.716	2	26.81	59100	32	1012406	F32:9701	No	FL1189b_IPP114_PB_CB_vivax_6_odd.raw	sp|P63261|ACTG_HUMAN Actin cytoplasmic 2 OS=Homo sapiens OX=9606 GN=ACTG1 PE=1 SV=1:sp|P60709|ACTB_HUMAN Actin cytoplasmic 1 OS=Homo sapiens OX=9606 GN=ACTB PE=1 SV=1:sp|Q6S8J3|POTEE_HUMAN POTE ankyrin domain family member E OS=Homo sapiens OX=9606 GN=POTEE PE=2 SV=3:sp|P68032|ACTC_HUMAN Actin alpha cardiac muscle 1 OS=Homo sapiens OX=9606 GN=ACTC1 PE=1 SV=1:sp|P62736|ACTA_HUMAN Actin aortic smoo…			PEAKS DB
EASGSGGGYGGGSGKSSHS	23.02	1624.67	19	-0.5	542.564	3	20.52	244000	11	635526	F11:7790	No	FL1029_IPP114_PB_CB_vivax_7_even.raw	sp|P35527|K1C9_HUMAN Keratin type I cytoskeletal 9 OS=Homo sapiens OX=9606 GN=KRT9 PE=1 SV=3			PEAKS DB
EAVGTGVR	17.45	787.419	8	-0.7	394.716	2	25.68	325000	11	637317	F11:9749	No	FL1029_IPP114_PB_CB_vivax_7_even.raw	sp|Q6E0U4|DMKN_HUMAN Dermokine OS=Homo sapiens OX=9606 GN=DMKN PE=1 SV=3			PEAKS DB
ED(-18.01)IVADHVASYGVN	22.09	1469.68	14	0.5	735.847	2	48.94	86500	31	999325	F31:17637	No	FL1189b_IPP114_PB_CB_vivax_6_even.raw	sp|P01909|DQA1_HUMAN HLA class II histocompatibility antigen DQ alpha 1 chain OS=Homo sapiens OX=9606 GN=HLA-DQA1 PE=1 SV=1:sp|P01906|DQA2_HUMAN HLA class II histocompatibility antigen DQ alpha 2 chain OS=Homo sapiens OX=9606 GN=HLA-DQA2 PE=1 SV=2	Dehydration	D2:Dehydration:0.00	PEAKS PTM
EDIAQKSKAEAES	40	1404.67	13	2.6	703.346	2	25.58	340000	11	637285	F11:9714	No	FL1029_IPP114_PB_CB_vivax_7_even.raw	sp|P04264|K2C1_HUMAN Keratin type II cytoskeletal 1 OS=Homo sapiens OX=9606 GN=KRT1 PE=1 SV=6			PEAKS DB
EDIAQKSKAEAESL	39.05	1517.76	14	2.5	759.888	2	34.28	267000	14	887250	F14:13094	No	FL1029_IPP114_PB_CB_vivax_8_odd.raw	sp|P04264|K2C1_HUMAN Keratin type II cytoskeletal 1 OS=Homo sapiens OX=9606 GN=KRT1 PE=1 SV=6			PEAKS DB
EDIVADHVASYG	30.42	1274.58	12	-0.2	638.296	2	40.01	710000	32	1016789	F32:14462	No	FL1189b_IPP114_PB_CB_vivax_6_odd.raw	sp|P01909|DQA1_HUMAN HLA class II histocompatibility antigen DQ alpha 1 chain OS=Homo sapiens OX=9606 GN=HLA-DQA1 PE=1 SV=1:sp|P01906|DQA2_HUMAN HLA class II histocompatibility antigen DQ alpha 2 chain OS=Homo sapiens OX=9606 GN=HLA-DQA2 PE=1 SV=2			PEAKS DB
EDIVADHVASYGV	33.38	1373.65	13	-0.5	687.83	2	44.87	409000	31	997998	F31:16175	No	FL1189b_IPP114_PB_CB_vivax_6_even.raw	sp|P01909|DQA1_HUMAN HLA class II histocompatibility antigen DQ alpha 1 chain OS=Homo sapiens OX=9606 GN=HLA-DQA1 PE=1 SV=1:sp|P01906|DQA2_HUMAN HLA class II histocompatibility antigen DQ alpha 2 chain OS=Homo sapiens OX=9606 GN=HLA-DQA2 PE=1 SV=2			PEAKS DB
EDIVADHVASYGVN	27.3	1487.69	14	0.9	744.852	2	42.21	7830000	32	1017504	F32:15375	No	FL1189b_IPP114_PB_CB_vivax_6_odd.raw	sp|P01909|DQA1_HUMAN HLA class II histocompatibility antigen DQ alpha 1 chain OS=Homo sapiens OX=9606 GN=HLA-DQA1 PE=1 SV=1:sp|P01906|DQA2_HUMAN HLA class II histocompatibility antigen DQ alpha 2 chain OS=Homo sapiens OX=9606 GN=HLA-DQA2 PE=1 SV=2			PEAKS DB
EDIVADHVASYGVN(+.98)	40.2	1488.67	14	0.1	745.344	2	43.53	453000	32	1017949	F32:15744	No	FL1189b_IPP114_PB_CB_vivax_6_odd.raw	sp|P01909|DQA1_HUMAN HLA class II histocompatibility antigen DQ alpha 1 chain OS=Homo sapiens OX=9606 GN=HLA-DQA1 PE=1 SV=1:sp|P01906|DQA2_HUMAN HLA class II histocompatibility antigen DQ alpha 2 chain OS=Homo sapiens OX=9606 GN=HLA-DQA2 PE=1 SV=2	Deamidation (NQ)	N14:Deamidation (NQ):1000.00	PEAKS PTM
EDIVADHVASYGVNLY	23.11	1763.84	16	-0.2	882.925	2	49.67		32	1019950	F32:17923	No	FL1189b_IPP114_PB_CB_vivax_6_odd.raw	sp|P01909|DQA1_HUMAN HLA class II histocompatibility antigen DQ alpha 1 chain OS=Homo sapiens OX=9606 GN=HLA-DQA1 PE=1 SV=1			PEAKS DB
EDMEGEENG	19.4	1008.33	9	4.6	505.177	2	35.96		32	1015451	F32:13012	No	FL1189b_IPP114_PB_CB_vivax_6_odd.raw	sp|Q99590|SCAFB_HUMAN Protein SCAF11 OS=Homo sapiens OX=9606 GN=SCAF11 PE=1 SV=2			PEAKS DB
EDS(+114.04)YNYDDSEEKEEQGQKPEKV	21.91	2759.17	22	-3.7	920.727	3	30.45		14	885884	F14:11601	No	FL1029_IPP114_PB_CB_vivax_8_odd.raw	tr|A5K8G8|A5K8G8_PLAVS Uncharacterized protein OS=Plasmodium vivax (strain Salvador I) OX=126793 GN=PVX_083555 PE=4 SV=1	Ubiquitin	S3:Ubiquitin:61.82	PEAKS PTM
EDSYNYDDSEEKEEQGQKPEKV	19.93	2645.13	22	2.5	882.718	3	29.45	316000	11	638658	F11:11211	No	FL1029_IPP114_PB_CB_vivax_7_even.raw	tr|A5K8G8|A5K8G8_PLAVS Uncharacterized protein OS=Plasmodium vivax (strain Salvador I) OX=126793 GN=PVX_083555 PE=4 SV=1			PEAKS DB
EDYSPRKV	16.58	992.493	8	-0.4	497.253	2	26.88	76100	31	992063	F31:9717	No	FL1189b_IPP114_PB_CB_vivax_6_even.raw	tr|A5K8G9|A5K8G9_PLAVS Uncharacterized protein OS=Plasmodium vivax (strain Salvador I) OX=126793 GN=PVX_083560 PE=4 SV=1			PEAKS DB
EDYSPRKVAF	38.45	1210.6	10	2.3	606.308	2	33.69	614000	13	972606	F13:12869	No	FL1029_IPP114_PB_CB_vivax_8_even.raw	tr|A5K8G9|A5K8G9_PLAVS Uncharacterized protein OS=Plasmodium vivax (strain Salvador I) OX=126793 GN=PVX_083560 PE=4 SV=1			PEAKS DB
EDYSPRKVAFR	31.39	1366.7	11	0	456.574	3	29.76	1580000	14	885638	F14:11317	No	FL1029_IPP114_PB_CB_vivax_8_odd.raw	tr|A5K8G9|A5K8G9_PLAVS Uncharacterized protein OS=Plasmodium vivax (strain Salvador I) OX=126793 GN=PVX_083560 PE=4 SV=1			PEAKS DB
EEANADLEVK	28.9	1116.53	10	-0.2	559.272	2	30.66	236000	8	706398	F8:11721	No	FL1029_IPP114_PB_CB_vivax_4_odd.raw	sp|P02533|K1C14_HUMAN Keratin type I cytoskeletal 14 OS=Homo sapiens OX=9606 GN=KRT14 PE=1 SV=4:sp|P08779|K1C16_HUMAN Keratin type I cytoskeletal 16 OS=Homo sapiens OX=9606 GN=KRT16 PE=1 SV=4:sp|P19012|K1C15_HUMAN Keratin type I cytoskeletal 15 OS=Homo sapiens OX=9606 GN=KRT15 PE=1 SV=3:sp|P13646|K1C13_HUMAN Keratin type I cytoskeletal 13 OS=Homo sapiens OX=9606 GN=KRT13 PE=1 SV=4			PEAKS DB
EEANNDLENKIQ	20.19	1415.65	12	0.8	708.834	2	32.32	163000	10	662310	F10:12338	No	FL1029_IPP114_PB_CB_vivax_6_odd.raw	sp|P35527|K1C9_HUMAN Keratin type I cytoskeletal 9 OS=Homo sapiens OX=9606 GN=KRT9 PE=1 SV=3			PEAKS DB
EEASGSGGGYGGGSGKSS	19.19	1529.62	18	-0.2	765.819	2	22.98	57400	11	636359	F11:8702	No	FL1029_IPP114_PB_CB_vivax_7_even.raw	sp|P35527|K1C9_HUMAN Keratin type I cytoskeletal 9 OS=Homo sapiens OX=9606 GN=KRT9 PE=1 SV=3			PEAKS DB
EEASGSGGGYGGGSGKSSHS	43.79	1753.71	20	-1.2	585.578	3	21.5	497000	11	635859	F11:8147	No	FL1029_IPP114_PB_CB_vivax_7_even.raw	sp|P35527|K1C9_HUMAN Keratin type I cytoskeletal 9 OS=Homo sapiens OX=9606 GN=KRT9 PE=1 SV=3			PEAKS DB
EEDGYPEEGY	17.47	1186.43	10	-4.8	594.22	2	40.51		3	867038	F3:15469	No	FL1029_IPP114_PB_CB_vivax_2_even.raw	tr|A5KCF9|A5KCF9_PLAVS Uncharacterized protein OS=Plasmodium vivax (strain Salvador I) OX=126793 GN=PVX_001950 PE=4 SV=1			PEAKS DB
EEEIRANVAVVSGAP	28.58	1539.79	15	0	770.902	2	41.58	590000	32	1017297	F32:15037	No	FL1189b_IPP114_PB_CB_vivax_6_odd.raw	sp|O00560|SDCB1_HUMAN Syntenin-1 OS=Homo sapiens OX=9606 GN=SDCBP PE=1 SV=1			PEAKS DB
EEETFEEKKSEEKKD	35.85	1883.86	15	0.8	628.962	3	23.14	1800000	13	968845	F13:8794	No	FL1029_IPP114_PB_CB_vivax_8_even.raw	tr|A5K347|A5K347_PLAVS Exported protein 2 putative OS=Plasmodium vivax (strain Salvador I) OX=126793 GN=PVX_116915 PE=4 SV=1			PEAKS DB
EEIRANVAVVSGAP	21.28	1410.75	14	0.6	706.381	2	40.65	241000	32	1016986	F32:14689	No	FL1189b_IPP114_PB_CB_vivax_6_odd.raw	sp|O00560|SDCB1_HUMAN Syntenin-1 OS=Homo sapiens OX=9606 GN=SDCBP PE=1 SV=1			PEAKS DB
EEKLTAEK	15.81	946.497	8	-1.1	474.255	2	24.04	99000	32	1011463	F32:8679	No	FL1189b_IPP114_PB_CB_vivax_6_odd.raw	sp|P48594|SPB4_HUMAN Serpin B4 OS=Homo sapiens OX=9606 GN=SERPINB4 PE=1 SV=2:sp|P29508|SPB3_HUMAN Serpin B3 OS=Homo sapiens OX=9606 GN=SERPINB3 PE=1 SV=2:tr|A5K3H1|A5K3H1_PLAVS Tcp10_C domain-containing protein OS=Plasmodium vivax (strain Salvador I) OX=126793 GN=PVX_117540 PE=4 SV=1			PEAKS DB
EEKLTAEKL	26.11	1059.58	9	0.9	530.798	2	30.29	301000	12	683801	F12:11564	No	FL1029_IPP114_PB_CB_vivax_7_odd.raw	sp|P48594|SPB4_HUMAN Serpin B4 OS=Homo sapiens OX=9606 GN=SERPINB4 PE=1 SV=2:sp|P29508|SPB3_HUMAN Serpin B3 OS=Homo sapiens OX=9606 GN=SERPINB3 PE=1 SV=2			PEAKS DB
EEPLWYT	15.5	936.423	7	-0.4	469.219	2	37.86		13	974092	F13:14483	No	FL1029_IPP114_PB_CB_vivax_8_even.raw	sp|Q92628|K0232_HUMAN Uncharacterized protein KIAA0232 OS=Homo sapiens OX=9606 GN=KIAA0232 PE=1 SV=5			PEAKS DB
EEPPHEGCNKGAEEGADNC	18.58	1984.75	19	3.7	993.387	2	47.67		31	998918	F31:17193	No	FL1189b_IPP114_PB_CB_vivax_6_even.raw	tr|A5K1X7|A5K1X7_PLAVS Uncharacterized protein OS=Plasmodium vivax (strain Salvador I) OX=126793 GN=PVX_113825 PE=4 SV=1			PEAKS DB
EEQLQQIR	21.11	1042.54	8	0.6	522.278	2	30.34	962000	10	661642	F10:11555	No	FL1029_IPP114_PB_CB_vivax_6_odd.raw	sp|P13645|K1C10_HUMAN Keratin type I cytoskeletal 10 OS=Homo sapiens OX=9606 GN=KRT10 PE=1 SV=6:sp|Q7Z3Y9|K1C26_HUMAN Keratin type I cytoskeletal 26 OS=Homo sapiens OX=9606 GN=KRT26 PE=1 SV=2			PEAKS DB
EEQLQQIRAE	34.11	1242.62	10	2.9	622.319	2	32.97	396000	11	639937	F11:12546	No	FL1029_IPP114_PB_CB_vivax_7_even.raw	sp|P13645|K1C10_HUMAN Keratin type I cytoskeletal 10 OS=Homo sapiens OX=9606 GN=KRT10 PE=1 SV=6			PEAKS DB
EESNYELEGK	27.27	1196.52	10	1.6	599.268	2	29.87	643000	10	661462	F10:11386	No	FL1029_IPP114_PB_CB_vivax_6_odd.raw	sp|P13645|K1C10_HUMAN Keratin type I cytoskeletal 10 OS=Homo sapiens OX=9606 GN=KRT10 PE=1 SV=6			PEAKS DB
EESNYELEGKIK	33.7	1437.7	12	1.3	719.857	2	31.31	628000	10	661992	F10:11919	No	FL1029_IPP114_PB_CB_vivax_6_odd.raw	sp|P13645|K1C10_HUMAN Keratin type I cytoskeletal 10 OS=Homo sapiens OX=9606 GN=KRT10 PE=1 SV=6			PEAKS DB
EETLQEESNLPVKGD	35.87	1686.79	15	1.1	844.406	2	38.01	119000	14	888568	F14:14527	No	FL1029_IPP114_PB_CB_vivax_8_odd.raw	tr|A5KE06|A5KE06_PLAVS Uncharacterized protein OS=Plasmodium vivax (strain Salvador I) OX=126793 GN=PVX_111290 PE=4 SV=1			PEAKS DB
EETVITVDTKAAGKGKV	16.12	1744.96	17	-0.2	582.659	3	32.27	281000	32	1014222	F32:11669	No	FL1189b_IPP114_PB_CB_vivax_6_odd.raw	sp|P21333|FLNA_HUMAN Filamin-A OS=Homo sapiens OX=9606 GN=FLNA PE=1 SV=4			PEAKS DB
EEVINAIAPEKDVDGL	34.13	1710.87	16	-0.2	856.441	2	48.34	230000	32	1019526	F32:17462	No	FL1189b_IPP114_PB_CB_vivax_6_odd.raw	sp|P11586|C1TC_HUMAN C-1-tetrahydrofolate synthase cytoplasmic OS=Homo sapiens OX=9606 GN=MTHFD1 PE=1 SV=3			PEAKS DB
EEVVEIDGKQVQ	35.37	1371.69	12	-0.2	686.851	2	37.72	563000	32	1016024	F32:13640	No	FL1189b_IPP114_PB_CB_vivax_6_odd.raw	sp|Q9NU53|GINM1_HUMAN Glycoprotein integral membrane protein 1 OS=Homo sapiens OX=9606 GN=GINM1 PE=2 SV=1			PEAKS DB
EEVVEIDGKQVQQKDV	35.88	1841.94	16	-0.9	614.986	3	35.73	2020000	32	1015378	F32:12921	No	FL1189b_IPP114_PB_CB_vivax_6_odd.raw	sp|Q9NU53|GINM1_HUMAN Glycoprotein integral membrane protein 1 OS=Homo sapiens OX=9606 GN=GINM1 PE=2 SV=1			PEAKS DB
EEVVEIDGKQVQQKDVT	31.38	1942.98	17	-0.5	972.499	2	35.37	151000	32	1015258	F32:12805	No	FL1189b_IPP114_PB_CB_vivax_6_odd.raw	sp|Q9NU53|GINM1_HUMAN Glycoprotein integral membrane protein 1 OS=Homo sapiens OX=9606 GN=GINM1 PE=2 SV=1			PEAKS DB
EFCFTDYE	16.83	1052.38	8	3	527.199	2	46.92		7	801944	F7:17959	No	FL1029_IPP114_PB_CB_vivax_4_even.raw	tr|A5K1L8|A5K1L8_PLAVS C3H1-type domain-containing protein OS=Plasmodium vivax (strain Salvador I) OX=126793 GN=PVX_113265 PE=4 SV=1			PEAKS DB
EFTPPVQAAYQK	24.33	1377.69	12	-0.1	689.854	2	39.24	384000	32	1016534	F32:14184	No	FL1189b_IPP114_PB_CB_vivax_6_odd.raw	sp|P68871|HBB_HUMAN Hemoglobin subunit beta OS=Homo sapiens OX=9606 GN=HBB PE=1 SV=2			PEAKS DB
EFVTIKKD	16.98	978.539	8	0.3	490.277	2	29.8	324000	6	949002	F6:11388	No	FL1029_IPP114_PB_CB_vivax_3_odd.raw	sp|P04264|K2C1_HUMAN Keratin type II cytoskeletal 1 OS=Homo sapiens OX=9606 GN=KRT1 PE=1 SV=6			PEAKS DB
EFVTIKKDVD	18.25	1192.63	10	0.3	597.324	2	32.74	99300	6	950058	F6:12524	No	FL1029_IPP114_PB_CB_vivax_3_odd.raw	sp|P04264|K2C1_HUMAN Keratin type II cytoskeletal 1 OS=Homo sapiens OX=9606 GN=KRT1 PE=1 SV=6			PEAKS DB
EFVTLKKD	16.98	978.539	8	0.3	490.277	2	29.8	324000	6	949002	F6:11388	No	FL1029_IPP114_PB_CB_vivax_3_odd.raw	sp|P04259|K2C6B_HUMAN Keratin type II cytoskeletal 6B OS=Homo sapiens OX=9606 GN=KRT6B PE=1 SV=5:sp|P48668|K2C6C_HUMAN Keratin type II cytoskeletal 6C OS=Homo sapiens OX=9606 GN=KRT6C PE=1 SV=3:sp|P02538|K2C6A_HUMAN Keratin type II cytoskeletal 6A OS=Homo sapiens OX=9606 GN=KRT6A PE=1 SV=3:sp|P12035|K2C3_HUMAN Keratin type II cytoskeletal 3 OS=Homo sapiens OX=9606 GN=KRT3 PE=1 SV=3			PEAKS DB
EFVTLKKDVD	18.25	1192.63	10	0.3	597.324	2	32.74	99300	6	950058	F6:12524	No	FL1029_IPP114_PB_CB_vivax_3_odd.raw	sp|P04259|K2C6B_HUMAN Keratin type II cytoskeletal 6B OS=Homo sapiens OX=9606 GN=KRT6B PE=1 SV=5:sp|P48668|K2C6C_HUMAN Keratin type II cytoskeletal 6C OS=Homo sapiens OX=9606 GN=KRT6C PE=1 SV=3:sp|P02538|K2C6A_HUMAN Keratin type II cytoskeletal 6A OS=Homo sapiens OX=9606 GN=KRT6A PE=1 SV=3:sp|P12035|K2C3_HUMAN Keratin type II cytoskeletal 3 OS=Homo sapiens OX=9606 GN=KRT3 PE=1 SV=3			PEAKS DB
EGAPGAEGSP(+15.99)GRD	26.73	1214.52	13	0.5	608.266	2	24.03	144000	29	905560	F29:8686	No	FL1189_IPP114_PB_CB_vivax_6_even.raw	sp|P02452|CO1A1_HUMAN Collagen alpha-1(I) chain OS=Homo sapiens OX=9606 GN=COL1A1 PE=1 SV=5	Oxidation or Hydroxylation	P10:Oxidation or Hydroxylation:0.00	PEAKS PTM
EGAPGAEGSPGRD(+15.99)	21.37	1214.52	13	0.5	608.266	2	23.97	139000	31	991090	F31:8660	No	FL1189b_IPP114_PB_CB_vivax_6_even.raw	sp|P02452|CO1A1_HUMAN Collagen alpha-1(I) chain OS=Homo sapiens OX=9606 GN=COL1A1 PE=1 SV=5	Oxidation or Hydroxylation	D13:Oxidation or Hydroxylation:0.00	PEAKS PTM
EHIVADDRFTKSIS	25.47	1616.82	14	1	539.946	3	33.67	470000	30	929119	F30:12187	No	FL1189_IPP114_PB_CB_vivax_6_odd.raw	sp|P48449|ERG7_HUMAN Lanosterol synthase OS=Homo sapiens OX=9606 GN=LSS PE=1 SV=1			PEAKS DB
EIDDHDAVLRFNGAPTAN	15.29	1953.92	18	-0.5	652.313	3	42.18	131000	31	997117	F31:15230	No	FL1189b_IPP114_PB_CB_vivax_6_even.raw	sp|P15907|SIAT1_HUMAN Beta-galactoside alpha-2 6-sialyltransferase 1 OS=Homo sapiens OX=9606 GN=ST6GAL1 PE=1 SV=1			PEAKS DB
EIDDHDAVLRFNGAPTANFQQDVG	17.73	2628.22	24	0.8	877.082	3	47.68	352000	30	933738	F30:17242	No	FL1189_IPP114_PB_CB_vivax_6_odd.raw	sp|P15907|SIAT1_HUMAN Beta-galactoside alpha-2 6-sialyltransferase 1 OS=Homo sapiens OX=9606 GN=ST6GAL1 PE=1 SV=1			PEAKS DB
EIELQSQLALKQ	29.73	1398.77	12	2.6	700.395	2	42.47	150000	11	643311	F11:16203	No	FL1029_IPP114_PB_CB_vivax_7_even.raw	sp|P13645|K1C10_HUMAN Keratin type I cytoskeletal 10 OS=Homo sapiens OX=9606 GN=KRT10 PE=1 SV=6			PEAKS DB
EIFDSRGNPTVEVD	27.47	1576.74	14	3.9	789.379	2	42.24	91800	11	643244	F11:16114	No	FL1029_IPP114_PB_CB_vivax_7_even.raw	sp|P06733|ENOA_HUMAN Alpha-enolase OS=Homo sapiens OX=9606 GN=ENO1 PE=1 SV=2			PEAKS DB
EIGHFLRER	16.9	1155.61	9	0	386.212	3	31.22	243000	30	928310	F30:11307	No	FL1189_IPP114_PB_CB_vivax_6_odd.raw	sp|P55209|NP1L1_HUMAN Nucleosome assembly protein 1-like 1 OS=Homo sapiens OX=9606 GN=NAP1L1 PE=1 SV=1			PEAKS DB
EIGS(-18.01)HIKHR	17.87	1057.58	9	-0.3	529.796	2	24.76	144000	32	1011715	F32:8943	No	FL1189b_IPP114_PB_CB_vivax_6_odd.raw	sp|Q9Y490|TLN1_HUMAN Talin-1 OS=Homo sapiens OX=9606 GN=TLN1 PE=1 SV=3	Dehydration	S4:Dehydration:1000.00	PEAKS PTM
EIGSHIKHR	32.58	1075.59	9	0.6	359.537	3	21.42	3430000	32	1010646	F32:7709	No	FL1189b_IPP114_PB_CB_vivax_6_odd.raw	sp|Q9Y490|TLN1_HUMAN Talin-1 OS=Homo sapiens OX=9606 GN=TLN1 PE=1 SV=3			PEAKS DB
EIKERIAKR	22.39	1141.69	9	0.5	381.572	3	23.03	1340000	32	1011116	F32:8305	No	FL1189b_IPP114_PB_CB_vivax_6_odd.raw	sp|Q9UBW5|BIN2_HUMAN Bridging integrator 2 OS=Homo sapiens OX=9606 GN=BIN2 PE=1 SV=3			PEAKS DB
EIKRLEEV	18.34	1014.57	8	0.7	508.293	2	38.79	213000	13	974422	F13:14851	No	FL1029_IPP114_PB_CB_vivax_8_even.raw	tr|A5K0G3|A5K0G3_PLAVS Uncharacterized protein OS=Plasmodium vivax (strain Salvador I) OX=126793 GN=PVX_084350 PE=4 SV=1			PEAKS DB
EILDSYYQR	16.78	1185.57	9	-0.5	593.79	2	39.68	248000	32	1016674	F32:14350	No	FL1189b_IPP114_PB_CB_vivax_6_odd.raw	sp|P08514|ITA2B_HUMAN Integrin alpha-IIb OS=Homo sapiens OX=9606 GN=ITGA2B PE=1 SV=3			PEAKS DB
EILGIANNR	19.59	998.551	9	-0.3	500.283	2	37.85	1880000	32	1016071	F32:13675	No	FL1189b_IPP114_PB_CB_vivax_6_odd.raw	sp|Q86UX7|URP2_HUMAN Fermitin family homolog 3 OS=Homo sapiens OX=9606 GN=FERMT3 PE=1 SV=1			PEAKS DB
EINAILQKR	21.48	1083.64	9	1.6	542.828	2	32.41	200000	30	928703	F30:11741	No	FL1189_IPP114_PB_CB_vivax_6_odd.raw	sp|Q99707|METH_HUMAN Methionine synthase OS=Homo sapiens OX=9606 GN=MTR PE=1 SV=2			PEAKS DB
EINKRTNAENEFVTIKKD	20.67	2148.12	18	-0.8	717.046	3	30.18	482000	5	773728	F5:11506	No	FL1029_IPP114_PB_CB_vivax_3_even.raw	sp|P04264|K2C1_HUMAN Keratin type II cytoskeletal 1 OS=Homo sapiens OX=9606 GN=KRT1 PE=1 SV=6			PEAKS DB
EINTYRGLLESED	17.4	1537.73	13	2.8	769.872	2	43.08	133000	2	755704	F2:16496	No	FL1029_IPP114_PB_CB_vivax_1_odd.raw	sp|Q92764|KRT35_HUMAN Keratin type I cuticular Ha5 OS=Homo sapiens OX=9606 GN=KRT35 PE=2 SV=5			PEAKS DB
EITALAPSTM(+15.99)K	17.25	1176.61	11	0.1	589.31	2	35.11	100000	32	1015158	F32:12707	No	FL1189b_IPP114_PB_CB_vivax_6_odd.raw	sp|P63261|ACTG_HUMAN Actin cytoplasmic 2 OS=Homo sapiens OX=9606 GN=ACTG1 PE=1 SV=1:sp|P60709|ACTB_HUMAN Actin cytoplasmic 1 OS=Homo sapiens OX=9606 GN=ACTB PE=1 SV=1:sp|P68032|ACTC_HUMAN Actin alpha cardiac muscle 1 OS=Homo sapiens OX=9606 GN=ACTC1 PE=1 SV=1:sp|P62736|ACTA_HUMAN Actin aortic smooth muscle OS=Homo sapiens OX=9606 GN=ACTA2 PE=1 SV=1:sp|P68133|ACTS_HUMAN Actin alpha skeletal muscle…	Oxidation (M)	M10:Oxidation (M):1000.00	PEAKS PTM
EIVRDIKEKL	15.68	1241.73	10	-0.7	414.918	3	34.18	260000	32	1014864	F32:12370	No	FL1189b_IPP114_PB_CB_vivax_6_odd.raw	sp|P63261|ACTG_HUMAN Actin cytoplasmic 2 OS=Homo sapiens OX=9606 GN=ACTG1 PE=1 SV=1:sp|P60709|ACTB_HUMAN Actin cytoplasmic 1 OS=Homo sapiens OX=9606 GN=ACTB PE=1 SV=1:sp|A5A3E0|POTEF_HUMAN POTE ankyrin domain family member F OS=Homo sapiens OX=9606 GN=POTEF PE=1 SV=2:sp|Q6S8J3|POTEE_HUMAN POTE ankyrin domain family member E OS=Homo sapiens OX=9606 GN=POTEE PE=2 SV=3:sp|P68032|ACTC_HUMAN Actin alp…			PEAKS DB
EIVRDIKEKLC(+119.00)	16.47	1463.75	11	0.2	488.923	3	33.7	256000	30	929137	F30:12203	No	FL1189_IPP114_PB_CB_vivax_6_odd.raw	sp|P63261|ACTG_HUMAN Actin cytoplasmic 2 OS=Homo sapiens OX=9606 GN=ACTG1 PE=1 SV=1:sp|P60709|ACTB_HUMAN Actin cytoplasmic 1 OS=Homo sapiens OX=9606 GN=ACTB PE=1 SV=1:sp|A5A3E0|POTEF_HUMAN POTE ankyrin domain family member F OS=Homo sapiens OX=9606 GN=POTEF PE=1 SV=2	Cysteinylation	C11:Cysteinylation:1000.00	PEAKS PTM
EKAGAHLQGGA	17.88	1037.53	11	0.3	519.77	2	23.61	177000	29	905413	F29:8538	No	FL1189_IPP114_PB_CB_vivax_6_even.raw	sp|P04406|G3P_HUMAN Glyceraldehyde-3-phosphate dehydrogenase OS=Homo sapiens OX=9606 GN=GAPDH PE=1 SV=3			PEAKS DB
EKALNSIIDV	25.17	1100.61	10	1	551.312	2	44.71	808000	14	890955	F14:17100	No	FL1029_IPP114_PB_CB_vivax_8_odd.raw	sp|P05109|S10A8_HUMAN Protein S100-A8 OS=Homo sapiens OX=9606 GN=S100A8 PE=1 SV=1			PEAKS DB
EKFEKEAAEM(+15.99)GKG	16.33	1468.69	13	-0.6	490.569	3	24.7	174000	32	1011688	F32:8923	No	FL1189b_IPP114_PB_CB_vivax_6_odd.raw	sp|P68104|EF1A1_HUMAN Elongation factor 1-alpha 1 OS=Homo sapiens OX=9606 GN=EEF1A1 PE=1 SV=1:sp|Q5VTE0|EF1A3_HUMAN Putative elongation factor 1-alpha-like 3 OS=Homo sapiens OX=9606 GN=EEF1A1P5 PE=5 SV=1:sp|Q05639|EF1A2_HUMAN Elongation factor 1-alpha 2 OS=Homo sapiens OX=9606 GN=EEF1A2 PE=1 SV=1	Oxidation (M)	M10:Oxidation (M):1000.00	PEAKS PTM
EKFEKIKIIDFN	15.7	1522.84	12	-0.5	508.62	3	33.47	207000	11	640114	F11:12741	No	FL1029_IPP114_PB_CB_vivax_7_even.raw	tr|A5K3Y0|A5K3Y0_PLAVS Serine/threonine protein kinase putative OS=Plasmodium vivax (strain Salvador I) OX=126793 GN=PVX_118340 PE=4 SV=1			PEAKS DB
EKGHGIR	16.73	795.435	7	-0.5	398.725	2	20.03		11	635332	F11:7586	No	FL1029_IPP114_PB_CB_vivax_7_even.raw	sp|P15924|DESP_HUMAN Desmoplakin OS=Homo sapiens OX=9606 GN=DSP PE=1 SV=3:#DECOY#sp|Q8WUB2|F216A_HUMAN Protein FAM216A OS=Homo sapiens OX=9606 GN=FAM216A PE=2 SV=1			PEAKS DB
EKKDKNEDKKIDFSEF	17.28	1998.99	16	1.2	667.338	3	32.24	781000	14	886514	F14:12294	No	FL1029_IPP114_PB_CB_vivax_8_odd.raw	sp|P31151|S10A7_HUMAN Protein S100-A7 OS=Homo sapiens OX=9606 GN=S100A7 PE=1 SV=4:sp|Q86SG5|S1A7A_HUMAN Protein S100-A7A OS=Homo sapiens OX=9606 GN=S100A7A PE=1 SV=3			PEAKS DB
EKKKKKHTQ	22.04	1153.69	9	3.2	385.573	3	34.22	57400	32	1014873	F32:12402	No	FL1189b_IPP114_PB_CB_vivax_6_odd.raw	tr|A5K819|A5K819_PLAVS zf-C2HC5 domain-containing protein OS=Plasmodium vivax (strain Salvador I) OX=126793 GN=PVX_082800 PE=4 SV=1			PEAKS DB
EKLNHAVF	30.15	956.508	8	0.5	479.262	2	30.83	783000	14	886010	F14:11737	No	FL1029_IPP114_PB_CB_vivax_8_odd.raw	tr|A5K124|A5K124_PLAVS 40S ribosomal protein S25 putative OS=Plasmodium vivax (strain Salvador I) OX=126793 GN=PVX_085420 PE=4 SV=1			PEAKS DB
ELDINTDGAVNFQEFLILVIK	38.06	2390.27	21	-0.9	1196.14	2	50.27		32	1020158	F32:18140	No	FL1189b_IPP114_PB_CB_vivax_6_odd.raw	sp|P05109|S10A8_HUMAN Protein S100-A8 OS=Homo sapiens OX=9606 GN=S100A8 PE=1 SV=1			PEAKS DB
ELGKFLL	17.54	818.49	7	2.1	410.253	2	48.27	224000	13	977810	F13:18768	No	FL1029_IPP114_PB_CB_vivax_8_even.raw	tr|A5K1X7|A5K1X7_PLAVS Uncharacterized protein OS=Plasmodium vivax (strain Salvador I) OX=126793 GN=PVX_113825 PE=4 SV=1			PEAKS DB
ELHC(+47.98)DKLH	22.4	1041.45	8	1	521.735	2	23.97	543000	14	883575	F14:9105	No	FL1029_IPP114_PB_CB_vivax_8_odd.raw	sp|P68871|HBB_HUMAN Hemoglobin subunit beta OS=Homo sapiens OX=9606 GN=HBB PE=1 SV=2:sp|P02042|HBD_HUMAN Hemoglobin subunit delta OS=Homo sapiens OX=9606 GN=HBD PE=1 SV=2:sp|P69892|HBG2_HUMAN Hemoglobin subunit gamma-2 OS=Homo sapiens OX=9606 GN=HBG2 PE=1 SV=2:sp|P69891|HBG1_HUMAN Hemoglobin subunit gamma-1 OS=Homo sapiens OX=9606 GN=HBG1 PE=1 SV=2:sp|P02100|HBE_HUMAN Hemoglobin subunit epsilon O…	Cysteine oxidation to cysteic acid	C4:Cysteine oxidation to cysteic acid:1000.00	PEAKS PTM
ELHC(-33.99)DKLH	27.79	959.482	8	0.9	480.749	2	24.54	528000	14	883782	F14:9327	No	FL1029_IPP114_PB_CB_vivax_8_odd.raw	sp|P68871|HBB_HUMAN Hemoglobin subunit beta OS=Homo sapiens OX=9606 GN=HBB PE=1 SV=2:sp|P02042|HBD_HUMAN Hemoglobin subunit delta OS=Homo sapiens OX=9606 GN=HBD PE=1 SV=2:sp|P69892|HBG2_HUMAN Hemoglobin subunit gamma-2 OS=Homo sapiens OX=9606 GN=HBG2 PE=1 SV=2:sp|P69891|HBG1_HUMAN Hemoglobin subunit gamma-1 OS=Homo sapiens OX=9606 GN=HBG1 PE=1 SV=2:sp|P02100|HBE_HUMAN Hemoglobin subunit epsilon O…	Dehydroalanine (C)	C4:Dehydroalanine (C):1000.00	PEAKS PTM
ELIDQDARDLY	19.52	1349.65	11	1.2	675.831	2	43.95	126000	9	733553	F9:16783	No	FL1029_IPP114_PB_CB_vivax_6_even.raw	sp|P07355|ANXA2_HUMAN Annexin A2 OS=Homo sapiens OX=9606 GN=ANXA2 PE=1 SV=2			PEAKS DB
ELITVIKAPTSFG	15.69	1374.78	13	-1.5	688.394	2	49.65	230000	30	934381	F30:17940	No	FL1189_IPP114_PB_CB_vivax_6_odd.raw	sp|P15260|INGR1_HUMAN Interferon gamma receptor 1 OS=Homo sapiens OX=9606 GN=IFNGR1 PE=1 SV=1			PEAKS DB
ELLHFSIE	17.33	986.507	8	-1.8	494.26	2	35.34		14	887626	F14:13494	No	FL1029_IPP114_PB_CB_vivax_8_odd.raw	sp|Q9BZF9|UACA_HUMAN Uveal autoantigen with coiled-coil domains and ankyrin repeats OS=Homo sapiens OX=9606 GN=UACA PE=1 SV=2			PEAKS DB
ELNRVIQ	16.25	870.492	7	0.6	436.254	2	32.22		32	1014205	F32:11658	No	FL1189b_IPP114_PB_CB_vivax_6_odd.raw	sp|P04264|K2C1_HUMAN Keratin type II cytoskeletal 1 OS=Homo sapiens OX=9606 GN=KRT1 PE=1 SV=6:sp|P35908|K22E_HUMAN Keratin type II cytoskeletal 2 epidermal OS=Homo sapiens OX=9606 GN=KRT2 PE=1 SV=2			PEAKS DB
ELNSRLA	18.47	801.434	7	0	401.724	2	29.4	1740000	10	661242	F10:11191	No	FL1029_IPP114_PB_CB_vivax_6_odd.raw	sp|P35527|K1C9_HUMAN Keratin type I cytoskeletal 9 OS=Homo sapiens OX=9606 GN=KRT9 PE=1 SV=3			PEAKS DB
EM(+15.99)EENFAVEAANYQDTIGR	26.19	2201.95	19	1.8	1101.99	2	45.33	47400	8	711546	F8:17403	No	FL1029_IPP114_PB_CB_vivax_4_odd.raw	sp|P08670|VIME_HUMAN Vimentin OS=Homo sapiens OX=9606 GN=VIM PE=1 SV=4	Oxidation (M)	M2:Oxidation (M):1000.00	PEAKS PTM
ENAGEDPGLAR	21.14	1127.52	11	-0.2	564.768	2	28.48		11	638316	F11:10827	No	FL1029_IPP114_PB_CB_vivax_7_even.raw	sp|P81605|DCD_HUMAN Dermcidin OS=Homo sapiens OX=9606 GN=DCD PE=1 SV=2			PEAKS DB
ENEFVTIKKD	18.52	1221.62	10	2.5	611.821	2	31.35		6	949618	F6:11985	No	FL1029_IPP114_PB_CB_vivax_3_odd.raw	sp|P04264|K2C1_HUMAN Keratin type II cytoskeletal 1 OS=Homo sapiens OX=9606 GN=KRT1 PE=1 SV=6			PEAKS DB
ENEFVTLKKD	18.52	1221.62	10	2.5	611.821	2	31.35		6	949618	F6:11985	No	FL1029_IPP114_PB_CB_vivax_3_odd.raw	sp|P04259|K2C6B_HUMAN Keratin type II cytoskeletal 6B OS=Homo sapiens OX=9606 GN=KRT6B PE=1 SV=5:sp|P48668|K2C6C_HUMAN Keratin type II cytoskeletal 6C OS=Homo sapiens OX=9606 GN=KRT6C PE=1 SV=3:sp|P02538|K2C6A_HUMAN Keratin type II cytoskeletal 6A OS=Homo sapiens OX=9606 GN=KRT6A PE=1 SV=3:sp|P12035|K2C3_HUMAN Keratin type II cytoskeletal 3 OS=Homo sapiens OX=9606 GN=KRT3 PE=1 SV=3			PEAKS DB
ENHMGWFC	15.79	1022.37	8	-3.5	512.192	2	35.91		11	640970	F11:13684	No	FL1029_IPP114_PB_CB_vivax_7_even.raw	sp|O15013|ARHGA_HUMAN Rho guanine nucleotide exchange factor 10 OS=Homo sapiens OX=9606 GN=ARHGEF10 PE=1 SV=4			PEAKS DB
ENIYPDSQIPRHY	20.79	1630.77	13	-0.4	544.598	3	37.19	119000	31	995474	F31:13432	No	FL1189b_IPP114_PB_CB_vivax_6_even.raw	sp|Q10472|GALT1_HUMAN Polypeptide N-acetylgalactosaminyltransferase 1 OS=Homo sapiens OX=9606 GN=GALNT1 PE=1 SV=1			PEAKS DB
ENKEGLE	18.14	817.382	7	-1.4	409.698	2	24.87	395000	11	637029	F11:9442	No	FL1029_IPP114_PB_CB_vivax_7_even.raw	sp|P06733|ENOA_HUMAN Alpha-enolase OS=Homo sapiens OX=9606 GN=ENO1 PE=1 SV=2			PEAKS DB
ENNKLIVRR	23.13	1140.67	9	0.8	381.232	3	25.26	1890000	31	991519	F31:9114	No	FL1189b_IPP114_PB_CB_vivax_6_even.raw	sp|P00488|F13A_HUMAN Coagulation factor XIII A chain OS=Homo sapiens OX=9606 GN=F13A1 PE=1 SV=4			PEAKS DB
ENPGGYVAYSKAATV	16.16	1525.74	15	-0.1	763.878	2	39.08	84800	32	1016486	F32:14156	No	FL1189b_IPP114_PB_CB_vivax_6_odd.raw	sp|P02786|TFR1_HUMAN Transferrin receptor protein 1 OS=Homo sapiens OX=9606 GN=TFRC PE=1 SV=2			PEAKS DB
ENPGGYVAYSKAATVT	32.64	1626.79	16	-0.6	814.401	2	38.55	999000	32	1016298	F32:13927	No	FL1189b_IPP114_PB_CB_vivax_6_odd.raw	sp|P02786|TFR1_HUMAN Transferrin receptor protein 1 OS=Homo sapiens OX=9606 GN=TFRC PE=1 SV=2			PEAKS DB
ENPGGYVAYSKAATVTG	40.43	1683.81	17	-0.2	842.912	2	38.71	727000	32	1016361	F32:13999	No	FL1189b_IPP114_PB_CB_vivax_6_odd.raw	sp|P02786|TFR1_HUMAN Transferrin receptor protein 1 OS=Homo sapiens OX=9606 GN=TFRC PE=1 SV=2			PEAKS DB
ENPGGYVAYSKAATVTGK	27.63	1811.91	18	-0.6	906.959	2	34.98	165000	32	1015118	F32:12644	No	FL1189b_IPP114_PB_CB_vivax_6_odd.raw	sp|P02786|TFR1_HUMAN Transferrin receptor protein 1 OS=Homo sapiens OX=9606 GN=TFRC PE=1 SV=2			PEAKS DB
ENPGGYVAYSKAATVTGKL	28.65	1924.99	19	0.4	642.671	3	40.42	482000	31	996533	F31:14581	No	FL1189b_IPP114_PB_CB_vivax_6_even.raw	sp|P02786|TFR1_HUMAN Transferrin receptor protein 1 OS=Homo sapiens OX=9606 GN=TFRC PE=1 SV=2			PEAKS DB
ENPGGYVAYSKAATVTGKLV	17.78	2024.06	20	0.2	675.693	3	42.82	393000	30	932134	F30:15482	No	FL1189_IPP114_PB_CB_vivax_6_odd.raw	sp|P02786|TFR1_HUMAN Transferrin receptor protein 1 OS=Homo sapiens OX=9606 GN=TFRC PE=1 SV=2			PEAKS DB
EPENWQH	17.03	938.388	7	1.3	470.202	2	39.19		13	974574	F13:15002	No	FL1029_IPP114_PB_CB_vivax_8_even.raw	sp|Q6ZMY3|SPOC1_HUMAN SPOC domain-containing protein 1 OS=Homo sapiens OX=9606 GN=SPOCD1 PE=2 SV=1			PEAKS DB
EPQPGEARL	21.67	995.504	9	-0.8	498.759	2	30.8	427000	7	796374	F7:11707	No	FL1029_IPP114_PB_CB_vivax_4_even.raw	sp|P50416|CPT1A_HUMAN Carnitine O-palmitoyltransferase 1 liver isoform OS=Homo sapiens OX=9606 GN=CPT1A PE=1 SV=2			PEAKS DB
EPRPPHGEL	19.42	1030.52	9	-1	516.266	2	27.85	441000	2	750156	F2:10579	No	FL1029_IPP114_PB_CB_vivax_1_odd.raw	sp|P04818|TYSY_HUMAN Thymidylate synthase OS=Homo sapiens OX=9606 GN=TYMS PE=1 SV=3			PEAKS DB
EPSRGINPDEAVAYG	25.87	1573.74	15	-0.5	787.875	2	38.88	508000	32	1016416	F32:14051	No	FL1189b_IPP114_PB_CB_vivax_6_odd.raw	sp|P11021|BIP_HUMAN Endoplasmic reticulum chaperone BiP OS=Homo sapiens OX=9606 GN=HSPA5 PE=1 SV=2			PEAKS DB
EPSRGINPDEAVAYGA	16.25	1644.77	16	-0.2	823.394	2	40.19	47700	31	996458	F31:14514	No	FL1189b_IPP114_PB_CB_vivax_6_even.raw	sp|P11021|BIP_HUMAN Endoplasmic reticulum chaperone BiP OS=Homo sapiens OX=9606 GN=HSPA5 PE=1 SV=2			PEAKS DB
EPSRGINPDEAVAYGAA	22.7	1715.81	17	-0.2	858.913	2	40.28	196000	32	1016867	F32:14560	No	FL1189b_IPP114_PB_CB_vivax_6_odd.raw	sp|P11021|BIP_HUMAN Endoplasmic reticulum chaperone BiP OS=Homo sapiens OX=9606 GN=HSPA5 PE=1 SV=2			PEAKS DB
EPTEEYDQYEEYE	17.11	1722.64	13	-1.3	862.327	2	39.72	79200	11	642332	F11:15162	No	FL1029_IPP114_PB_CB_vivax_7_even.raw	sp|Q8WZ42|TITIN_HUMAN Titin OS=Homo sapiens OX=9606 GN=TTN PE=1 SV=4			PEAKS DB
EQGSDEEHC	16.19	1032.35	9	-3.8	517.178	2	38.05		32	1016145	F32:13772	No	FL1189b_IPP114_PB_CB_vivax_6_odd.raw	sp|Q9UNS1|TIM_HUMAN Protein timeless homolog OS=Homo sapiens OX=9606 GN=TIMELESS PE=1 SV=2			PEAKS DB
EQNLRQGVD	22.2	1057.52	9	0.7	529.765	2	26.86	168000	10	660242	F10:10224	No	FL1029_IPP114_PB_CB_vivax_6_odd.raw	sp|P35527|K1C9_HUMAN Keratin type I cytoskeletal 9 OS=Homo sapiens OX=9606 GN=KRT9 PE=1 SV=3			PEAKS DB
EQNLRQGVDAD(-18.01)	18.44	1225.57	11	2.8	613.793	2	29.79		5	773556	F5:11337	No	FL1029_IPP114_PB_CB_vivax_3_even.raw	sp|P35527|K1C9_HUMAN Keratin type I cytoskeletal 9 OS=Homo sapiens OX=9606 GN=KRT9 PE=1 SV=3	Dehydration	D11:Dehydration:0.00	PEAKS PTM
ERAVTGYNDPETGNI	35.14	1634.75	15	2.4	818.386	2	35.79	368000	11	640935	F11:13631	No	FL1029_IPP114_PB_CB_vivax_7_even.raw	sp|P15924|DESP_HUMAN Desmoplakin OS=Homo sapiens OX=9606 GN=DSP PE=1 SV=3			PEAKS DB
ERAVTGYNDPETGNII	27.64	1747.84	16	1.8	874.928	2	41.3	268000	11	642897	F11:15769	No	FL1029_IPP114_PB_CB_vivax_7_even.raw	sp|P15924|DESP_HUMAN Desmoplakin OS=Homo sapiens OX=9606 GN=DSP PE=1 SV=3			PEAKS DB
ERAVTGYNDPETGNIIS	27.94	1834.87	17	0.5	918.442	2	39.11	137000	12	686917	F12:14971	No	FL1029_IPP114_PB_CB_vivax_7_odd.raw	sp|P15924|DESP_HUMAN Desmoplakin OS=Homo sapiens OX=9606 GN=DSP PE=1 SV=3			PEAKS DB
ERGAPGEKGEGGPPG	16.84	1393.66	15	-2.5	697.835	2	31.28	76200	31	993526	F31:11307	No	FL1189b_IPP114_PB_CB_vivax_6_even.raw	sp|P02461|CO3A1_HUMAN Collagen alpha-1(III) chain OS=Homo sapiens OX=9606 GN=COL3A1 PE=1 SV=4			PEAKS DB
ERIM(+15.99)KAQAL	31.5	1074.59	9	0	538.3	2	26.68	1030000	12	682531	F12:10155	No	FL1029_IPP114_PB_CB_vivax_7_odd.raw	sp|P08238|HS90B_HUMAN Heat shock protein HSP 90-beta OS=Homo sapiens OX=9606 GN=HSP90AB1 PE=1 SV=4	Oxidation (M)	M4:Oxidation (M):1000.00	PEAKS PTM
ERTFIAIKPDGVQ	19.35	1472.8	13	-1.2	491.94	3	38.86	101000	31	996016	F31:14030	No	FL1189b_IPP114_PB_CB_vivax_6_even.raw	sp|P22392|NDKB_HUMAN Nucleoside diphosphate kinase B OS=Homo sapiens OX=9606 GN=NME2 PE=1 SV=1:sp|P15531|NDKA_HUMAN Nucleoside diphosphate kinase A OS=Homo sapiens OX=9606 GN=NME1 PE=1 SV=1			PEAKS DB
ES(-18.01)GPSIVHR	16.33	962.493	9	0.4	321.839	3	27.14	119000	32	1012520	F32:9815	No	FL1189b_IPP114_PB_CB_vivax_6_odd.raw	sp|P63261|ACTG_HUMAN Actin cytoplasmic 2 OS=Homo sapiens OX=9606 GN=ACTG1 PE=1 SV=1:sp|P60709|ACTB_HUMAN Actin cytoplasmic 1 OS=Homo sapiens OX=9606 GN=ACTB PE=1 SV=1:sp|A5A3E0|POTEF_HUMAN POTE ankyrin domain family member F OS=Homo sapiens OX=9606 GN=POTEF PE=1 SV=2:sp|Q6S8J3|POTEE_HUMAN POTE ankyrin domain family member E OS=Homo sapiens OX=9606 GN=POTEE PE=2 SV=3:sp|Q9BYX7|ACTBM_HUMAN Putative…	Dehydration	S2:Dehydration:12.33	PEAKS PTM
ES(-18.01)VGKGAVH	15.22	864.445	9	0.3	433.23	2	25.56	119000	9	726942	F9:9711	No	FL1029_IPP114_PB_CB_vivax_6_even.raw	sp|P81605|DCD_HUMAN Dermcidin OS=Homo sapiens OX=9606 GN=DCD PE=1 SV=2	Dehydration	S2:Dehydration:1000.00	PEAKS PTM
ESDDPMAYIHFTAEGEVTFK	18.68	2286.01	20	0.5	763.013	3	49.76		6	955930	F6:19103	No	FL1029_IPP114_PB_CB_vivax_3_odd.raw	sp|P14625|ENPL_HUMAN Endoplasmin OS=Homo sapiens OX=9606 GN=HSP90B1 PE=1 SV=1			PEAKS DB
ESGPSIVHR	27.92	980.504	9	-0.8	327.842	3	27.13	715000	32	1012512	F32:9801	No	FL1189b_IPP114_PB_CB_vivax_6_odd.raw	sp|P63261|ACTG_HUMAN Actin cytoplasmic 2 OS=Homo sapiens OX=9606 GN=ACTG1 PE=1 SV=1:sp|P60709|ACTB_HUMAN Actin cytoplasmic 1 OS=Homo sapiens OX=9606 GN=ACTB PE=1 SV=1:sp|A5A3E0|POTEF_HUMAN POTE ankyrin domain family member F OS=Homo sapiens OX=9606 GN=POTEF PE=1 SV=2:sp|Q6S8J3|POTEE_HUMAN POTE ankyrin domain family member E OS=Homo sapiens OX=9606 GN=POTEE PE=2 SV=3:sp|Q9BYX7|ACTBM_HUMAN Putative…			PEAKS DB
ESGPTTYKVTSTLTIK	31.87	1724.92	16	-0.1	575.98	3	38.25	243000	32	1016206	F32:13843	No	FL1189b_IPP114_PB_CB_vivax_6_odd.raw	sp|P01871|IGHM_HUMAN Immunoglobulin heavy constant mu OS=Homo sapiens OX=9606 GN=IGHM PE=1 SV=4:sp|P0DOX6|IGM_HUMAN Immunoglobulin mu heavy chain OS=Homo sapiens OX=9606 PE=1 SV=2			PEAKS DB
ESGPTTYKVTSTLTIKESD	16.11	2056.02	19	0.3	686.348	3	39.12	607000	31	996110	F31:14113	No	FL1189b_IPP114_PB_CB_vivax_6_even.raw	sp|P01871|IGHM_HUMAN Immunoglobulin heavy constant mu OS=Homo sapiens OX=9606 GN=IGHM PE=1 SV=4:sp|P0DOX6|IGM_HUMAN Immunoglobulin mu heavy chain OS=Homo sapiens OX=9606 PE=1 SV=2			PEAKS DB
ESGQVYVNDLPVNSGVT	22.45	1776.85	17	-1	889.433	2	48.87	266000	31	999303	F31:17612	No	FL1189b_IPP114_PB_CB_vivax_6_even.raw	sp|Q9NU53|GINM1_HUMAN Glycoprotein integral membrane protein 1 OS=Homo sapiens OX=9606 GN=GINM1 PE=2 SV=1			PEAKS DB
ESPEPLSQ	15.27	885.408	8	1.2	886.416	1	35.24	647000	9	730540	F9:13443	No	FL1029_IPP114_PB_CB_vivax_6_even.raw	sp|P08588|ADRB1_HUMAN Beta-1 adrenergic receptor OS=Homo sapiens OX=9606 GN=ADRB1 PE=1 SV=2			PEAKS DB
ESSHGWTGPSTG	15.53	1201.5	12	-0.5	601.757	2	31.25	185000	32	1013880	F32:11297	No	FL1189b_IPP114_PB_CB_vivax_6_odd.raw	sp|P20930|FILA_HUMAN Filaggrin OS=Homo sapiens OX=9606 GN=FLG PE=1 SV=3			PEAKS DB
ESTLHLVLR	27.49	1066.61	9	-0.1	534.314	2	38.35	1080000	32	1016236	F32:13856	No	FL1189b_IPP114_PB_CB_vivax_6_odd.raw	tr|A5K2R4|A5K2R4_PLAVS Ubiquitin/ribosomal putative OS=Plasmodium vivax (strain Salvador I) OX=126793 GN=PVX_115255 PE=4 SV=1:sp|P62987|RL40_HUMAN Ubiquitin-60S ribosomal protein L40 OS=Homo sapiens OX=9606 GN=UBA52 PE=1 SV=2:sp|P62979|RS27A_HUMAN Ubiquitin-40S ribosomal protein S27a OS=Homo sapiens OX=9606 GN=RPS27A PE=1 SV=2:sp|P0CG47|UBB_HUMAN Polyubiquitin-B OS=Homo sapiens OX=9606 GN=UBB PE=…			PEAKS DB
ESVGKGAVHD	23.03	997.483	10	-0.3	499.748	2	24.11	254000	31	991137	F31:8696	No	FL1189b_IPP114_PB_CB_vivax_6_even.raw	sp|P81605|DCD_HUMAN Dermcidin OS=Homo sapiens OX=9606 GN=DCD PE=1 SV=2			PEAKS DB
ESVGKGAVHDV	27.32	1096.55	11	-0.6	549.283	2	27.34	268000	31	992234	F31:9882	No	FL1189b_IPP114_PB_CB_vivax_6_even.raw	sp|P81605|DCD_HUMAN Dermcidin OS=Homo sapiens OX=9606 GN=DCD PE=1 SV=2			PEAKS DB
ESVGKGAVHDVKD	24.12	1339.67	13	0.4	447.565	3	24.93	325000	31	991412	F31:9006	No	FL1189b_IPP114_PB_CB_vivax_6_even.raw	sp|P81605|DCD_HUMAN Dermcidin OS=Homo sapiens OX=9606 GN=DCD PE=1 SV=2			PEAKS DB
ESVGKGAVHDVKDV	25.92	1438.74	14	-0.3	480.588	3	28.26	324000	31	992544	F31:10219	No	FL1189b_IPP114_PB_CB_vivax_6_even.raw	sp|P81605|DCD_HUMAN Dermcidin OS=Homo sapiens OX=9606 GN=DCD PE=1 SV=2			PEAKS DB
ESYSVYVYK	31.86	1136.54	9	-1.6	569.276	2	39.01	146000	32	1016461	F32:14128	No	FL1189b_IPP114_PB_CB_vivax_6_odd.raw	sp|P62807|H2B1C_HUMAN Histone H2B type 1-C/E/F/G/I OS=Homo sapiens OX=9606 GN=HIST1H2BC PE=1 SV=4:sp|O60814|H2B1K_HUMAN Histone H2B type 1-K OS=Homo sapiens OX=9606 GN=HIST1H2BK PE=1 SV=3:sp|P57053|H2BFS_HUMAN Histone H2B type F-S OS=Homo sapiens OX=9606 GN=H2BFS PE=1 SV=2:sp|Q5QNW6|H2B2F_HUMAN Histone H2B type 2-F OS=Homo sapiens OX=9606 GN=HIST2H2BF PE=1 SV=3:sp|Q99877|H2B1N_HUMAN Histone H2B t…			PEAKS DB
ETIGKKFEK	15.85	1078.6	9	0.4	540.309	2	25.15	381000	29	905933	F29:9088	No	FL1189_IPP114_PB_CB_vivax_6_even.raw	sp|P13010|XRCC5_HUMAN X-ray repair cross-complementing protein 5 OS=Homo sapiens OX=9606 GN=XRCC5 PE=1 SV=3			PEAKS DB
ETNYGIPQR	24.14	1076.53	9	0.4	539.27	2	33.27	361000	31	994184	F31:12012	No	FL1189b_IPP114_PB_CB_vivax_6_even.raw	sp|P63244|RACK1_HUMAN Receptor of activated protein C kinase 1 OS=Homo sapiens OX=9606 GN=RACK1 PE=1 SV=3			PEAKS DB
ETTQLTADSHPSYHTDG	20.89	1858.8	17	-1	620.606	3	30.79	284000	32	1013725	F32:11140	No	FL1189b_IPP114_PB_CB_vivax_6_odd.raw	sp|Q9H3Z4|DNJC5_HUMAN DnaJ homolog subfamily C member 5 OS=Homo sapiens OX=9606 GN=DNAJC5 PE=1 SV=1			PEAKS DB
ETTQLTADSHPSYHTDGF	15.58	2005.87	18	-0.6	669.629	3	37.26	208000	31	995499	F31:13457	No	FL1189b_IPP114_PB_CB_vivax_6_even.raw	sp|Q9H3Z4|DNJC5_HUMAN DnaJ homolog subfamily C member 5 OS=Homo sapiens OX=9606 GN=DNAJC5 PE=1 SV=1			PEAKS DB
ETVITVDTKAAGKG	21.61	1388.75	14	0.3	695.383	2	31.88	363000	31	993723	F31:11513	No	FL1189b_IPP114_PB_CB_vivax_6_even.raw	sp|P21333|FLNA_HUMAN Filamin-A OS=Homo sapiens OX=9606 GN=FLNA PE=1 SV=4			PEAKS DB
ETVITVDTKAAGKGK	24.13	1516.85	15	0.5	506.623	3	28.89	305000	31	992755	F31:10447	No	FL1189b_IPP114_PB_CB_vivax_6_even.raw	sp|P21333|FLNA_HUMAN Filamin-A OS=Homo sapiens OX=9606 GN=FLNA PE=1 SV=4			PEAKS DB
ETVITVDTKAAGKGKV	22.3	1615.91	16	-0.5	539.645	3	31.32	549000	32	1013903	F32:11326	No	FL1189b_IPP114_PB_CB_vivax_6_odd.raw	sp|P21333|FLNA_HUMAN Filamin-A OS=Homo sapiens OX=9606 GN=FLNA PE=1 SV=4			PEAKS DB
ETVKDFVAR	17.97	1063.57	9	-0.3	355.529	3	32.93	243000	32	1014442	F32:11923	No	FL1189b_IPP114_PB_CB_vivax_6_odd.raw	sp|Q16760|DGKD_HUMAN Diacylglycerol kinase delta OS=Homo sapiens OX=9606 GN=DGKD PE=1 SV=4			PEAKS DB
ETYKYLYGR	18.26	1191.59	9	-0.6	398.204	3	33.37		32	1014597	F32:12078	No	FL1189b_IPP114_PB_CB_vivax_6_odd.raw	sp|Q15404|RSU1_HUMAN Ras suppressor protein 1 OS=Homo sapiens OX=9606 GN=RSU1 PE=1 SV=3			PEAKS DB
ETYLLEKSR	26.83	1137.6	9	0.3	569.809	2	31.58	307000	32	1013990	F32:11422	No	FL1189b_IPP114_PB_CB_vivax_6_odd.raw	sp|P35579|MYH9_HUMAN Myosin-9 OS=Homo sapiens OX=9606 GN=MYH9 PE=1 SV=4:sp|Q7Z406|MYH14_HUMAN Myosin-14 OS=Homo sapiens OX=9606 GN=MYH14 PE=1 SV=2:sp|P11055|MYH3_HUMAN Myosin-3 OS=Homo sapiens OX=9606 GN=MYH3 PE=1 SV=3:sp|P35749|MYH11_HUMAN Myosin-11 OS=Homo sapiens OX=9606 GN=MYH11 PE=1 SV=3:sp|P12882|MYH1_HUMAN Myosin-1 OS=Homo sapiens OX=9606 GN=MYH1 PE=1 SV=3:sp|P35580|MYH10_HUMAN Myosin-10 O…			PEAKS DB
EVASISEKH	16.95	998.503	9	1.7	500.26	2	21.92		4	815532	F4:8333	No	FL1029_IPP114_PB_CB_vivax_2_odd.raw	tr|A5KBH6|A5KBH6_PLAVS Uncharacterized protein OS=Plasmodium vivax (strain Salvador I) OX=126793 GN=PVX_003570 PE=4 SV=1			PEAKS DB
EVFLHVVKR	25.74	1125.67	9	0.5	376.229	3	31.75	197000	30	928485	F30:11512	No	FL1189_IPP114_PB_CB_vivax_6_odd.raw	sp|Q8NDB2|BANK1_HUMAN B-cell scaffold protein with ankyrin repeats OS=Homo sapiens OX=9606 GN=BANK1 PE=1 SV=3			PEAKS DB
EVFTPVVQR	18.24	1073.59	9	-0.9	537.8	2	38.64	633000	32	1016333	F32:13964	No	FL1189b_IPP114_PB_CB_vivax_6_odd.raw	sp|Q8IY22|CMIP_HUMAN C-Maf-inducing protein OS=Homo sapiens OX=9606 GN=CMIP PE=1 SV=3			PEAKS DB
EVGERIKD	21.06	944.493	8	0.5	473.254	2	24.94	304000	11	637052	F11:9466	No	FL1029_IPP114_PB_CB_vivax_7_even.raw	sp|P15924|DESP_HUMAN Desmoplakin OS=Homo sapiens OX=9606 GN=DSP PE=1 SV=3			PEAKS DB
EVNPSLGKTPEEVTRTVN	22.01	1969.01	18	0	657.345	3	34.95	198000	11	640647	F11:13306	No	FL1029_IPP114_PB_CB_vivax_7_even.raw	sp|P05089|ARGI1_HUMAN Arginase-1 OS=Homo sapiens OX=9606 GN=ARG1 PE=1 SV=2			PEAKS DB
EVNPSLGKTPEEVTRTVNT	23.36	2070.06	19	1	691.028	3	35.83		11	640946	F11:13652	No	FL1029_IPP114_PB_CB_vivax_7_even.raw	sp|P05089|ARGI1_HUMAN Arginase-1 OS=Homo sapiens OX=9606 GN=ARG1 PE=1 SV=2			PEAKS DB
EVNPSLGKTPEEVTRTVNTA	16.85	2141.1	20	1.2	714.707	3	36.84	242000	11	641293	F11:14032	No	FL1029_IPP114_PB_CB_vivax_7_even.raw	sp|P05089|ARGI1_HUMAN Arginase-1 OS=Homo sapiens OX=9606 GN=ARG1 PE=1 SV=2			PEAKS DB
EVQAAWQ(+.98)KL	15.04	1072.56	9	0.7	537.285	2	30.32	206000	12	683816	F12:11593	No	FL1029_IPP114_PB_CB_vivax_7_odd.raw	sp|P02100|HBE_HUMAN Hemoglobin subunit epsilon OS=Homo sapiens OX=9606 GN=HBE1 PE=1 SV=2	Deamidation (NQ)	Q7:Deamidation (NQ):11.12	PEAKS PTM
EVSKIDKSYLAYK	20.25	1542.83	13	-1.1	515.283	3	32.23		14	886508	F14:12288	No	FL1029_IPP114_PB_CB_vivax_8_odd.raw	tr|A5JZN9|A5JZN9_PLAVS 60S ribosomal protein L13 putative OS=Plasmodium vivax (strain Salvador I) OX=126793 GN=PVX_123070 PE=3 SV=1			PEAKS DB
EVSKIDKSYLAYKTLR	18.82	1913.06	16	0.1	479.273	4	34.3	145000	31	994527	F31:12389	No	FL1189b_IPP114_PB_CB_vivax_6_even.raw	tr|A5JZN9|A5JZN9_PLAVS 60S ribosomal protein L13 putative OS=Plasmodium vivax (strain Salvador I) OX=126793 GN=PVX_123070 PE=3 SV=1			PEAKS DB
EVSPPVTVR	15.38	982.545	9	-0.2	492.279	2	34.19	300000	29	908935	F29:12338	No	FL1189_IPP114_PB_CB_vivax_6_even.raw	sp|Q9UM07|PADI4_HUMAN Protein-arginine deiminase type-4 OS=Homo sapiens OX=9606 GN=PADI4 PE=1 SV=2			PEAKS DB
EVTCDPDS	19.23	864.317	8	-4	433.164	2	32.25		3	864128	F3:12288	No	FL1029_IPP114_PB_CB_vivax_2_even.raw	sp|Q9C0C2|TB182_HUMAN 182 kDa tankyrase-1-binding protein OS=Homo sapiens OX=9606 GN=TNKS1BP1 PE=1 SV=4			PEAKS DB
EVVEIDGKQVQ	22.47	1242.65	11	-0.1	622.33	2	36.46	211000	32	1015625	F32:13192	No	FL1189b_IPP114_PB_CB_vivax_6_odd.raw	sp|Q9NU53|GINM1_HUMAN Glycoprotein integral membrane protein 1 OS=Homo sapiens OX=9606 GN=GINM1 PE=2 SV=1			PEAKS DB
EVVEIDGKQVQQKDV	17.37	1712.89	15	-1.2	571.971	3	34.35	355000	32	1014919	F32:12442	No	FL1189b_IPP114_PB_CB_vivax_6_odd.raw	sp|Q9NU53|GINM1_HUMAN Glycoprotein integral membrane protein 1 OS=Homo sapiens OX=9606 GN=GINM1 PE=2 SV=1			PEAKS DB
EVVEIDGKQVQQKDVT	21.16	1813.94	16	1.1	605.655	3	34.06	315000	30	929246	F30:12330	No	FL1189_IPP114_PB_CB_vivax_6_odd.raw	sp|Q9NU53|GINM1_HUMAN Glycoprotein integral membrane protein 1 OS=Homo sapiens OX=9606 GN=GINM1 PE=2 SV=1			PEAKS DB
EYERAIIFR	27.35	1195.63	9	-0.4	399.552	3	37.49	407000	31	995578	F31:13536	No	FL1189b_IPP114_PB_CB_vivax_6_even.raw	sp|P27105|STOM_HUMAN Erythrocyte band 7 integral membrane protein OS=Homo sapiens OX=9606 GN=STOM PE=1 SV=3			PEAKS DB
EYLEKIKQR	24.89	1205.68	9	-0.1	402.899	3	27.9	235000	31	992416	F31:10078	No	FL1189b_IPP114_PB_CB_vivax_6_even.raw	sp|Q13547|HDAC1_HUMAN Histone deacetylase 1 OS=Homo sapiens OX=9606 GN=HDAC1 PE=1 SV=1			PEAKS DB
EYPDRIMNTF	19.98	1284.58	10	0.8	643.298	2	44.93	238000	12	688979	F12:17188	No	FL1029_IPP114_PB_CB_vivax_7_odd.raw	sp|P07437|TBB5_HUMAN Tubulin beta chain OS=Homo sapiens OX=9606 GN=TUBB PE=1 SV=2:sp|P68371|TBB4B_HUMAN Tubulin beta-4B chain OS=Homo sapiens OX=9606 GN=TUBB4B PE=1 SV=1:sp|Q13885|TBB2A_HUMAN Tubulin beta-2A chain OS=Homo sapiens OX=9606 GN=TUBB2A PE=1 SV=1:sp|Q9BVA1|TBB2B_HUMAN Tubulin beta-2B chain OS=Homo sapiens OX=9606 GN=TUBB2B PE=1 SV=1:sp|Q13509|TBB3_HUMAN Tubulin beta-3 chain OS=Homo sap…			PEAKS DB
EYTINIHKR	28.2	1172.63	9	0.7	391.884	3	28.68	217000	32	1013031	F32:10380	No	FL1189b_IPP114_PB_CB_vivax_6_odd.raw	sp|P62899|RL31_HUMAN 60S ribosomal protein L31 OS=Homo sapiens OX=9606 GN=RPL31 PE=1 SV=1			PEAKS DB
F(+71.04)KAKLAS	19.94	834.496	7	-2.4	418.254	2	32.3		8	706986	F8:12356	No	FL1029_IPP114_PB_CB_vivax_4_odd.raw	sp|P15924|DESP_HUMAN Desmoplakin OS=Homo sapiens OX=9606 GN=DSP PE=1 SV=3	Propionamide (K X@N-term)	F1:Propionamide (K X@N-term):11.06	PEAKS PTM
FAKLVREVAAPDVG	15.27	1470.82	14	0.5	491.281	3	38.71	265000	29	910435	F29:14002	No	FL1189_IPP114_PB_CB_vivax_6_even.raw	sp|Q14254|FLOT2_HUMAN Flotillin-2 OS=Homo sapiens OX=9606 GN=FLOT2 PE=1 SV=2			PEAKS DB
FAKLVRPPVQ	22.15	1153.7	10	-0.4	577.856	2	33.79		3	864674	F3:12887	No	FL1029_IPP114_PB_CB_vivax_2_even.raw	sp|P48047|ATPO_HUMAN ATP synthase subunit O mitochondrial OS=Homo sapiens OX=9606 GN=ATP5PO PE=1 SV=1			PEAKS DB
FAKLVRPPVQVY	27.31	1415.83	12	0.8	708.922	2	40.85	122000	32	1017060	F32:14754	No	FL1189b_IPP114_PB_CB_vivax_6_odd.raw	sp|P48047|ATPO_HUMAN ATP synthase subunit O mitochondrial OS=Homo sapiens OX=9606 GN=ATP5PO PE=1 SV=1			PEAKS DB
FAKLVRPPVQVYGIE	21.89	1714.98	15	1.5	572.667	3	43.85	432000	3	868226	F3:16744	No	FL1029_IPP114_PB_CB_vivax_2_even.raw	sp|P48047|ATPO_HUMAN ATP synthase subunit O mitochondrial OS=Homo sapiens OX=9606 GN=ATP5PO PE=1 SV=1			PEAKS DB
FAKLVRPPVQVYGIEGR	16.69	1928.1	17	1.3	643.708	3	40.67	817000	4	822163	F4:15499	No	FL1029_IPP114_PB_CB_vivax_2_odd.raw	sp|P48047|ATPO_HUMAN ATP synthase subunit O mitochondrial OS=Homo sapiens OX=9606 GN=ATP5PO PE=1 SV=1			PEAKS DB
FAKLVRPPVQVYGIEGRY	15.11	2091.16	18	1.3	698.062	3	42.71	326000	3	867819	F3:16267	No	FL1029_IPP114_PB_CB_vivax_2_even.raw	sp|P48047|ATPO_HUMAN ATP synthase subunit O mitochondrial OS=Homo sapiens OX=9606 GN=ATP5PO PE=1 SV=1			PEAKS DB
FAKLVRPPVQVYGIEGRYAT	15.8	2263.25	20	1.6	755.424	3	42.41	429000	3	867710	F3:16140	No	FL1029_IPP114_PB_CB_vivax_2_even.raw	sp|P48047|ATPO_HUMAN ATP synthase subunit O mitochondrial OS=Homo sapiens OX=9606 GN=ATP5PO PE=1 SV=1			PEAKS DB
FAKLVRPPVQVYGIEGRYATA	16.98	2334.28	21	0.6	779.103	3	42.81	294000	3	867855	F3:16338	No	FL1029_IPP114_PB_CB_vivax_2_even.raw	sp|P48047|ATPO_HUMAN ATP synthase subunit O mitochondrial OS=Homo sapiens OX=9606 GN=ATP5PO PE=1 SV=1			PEAKS DB
FAKLVRPPVQVYGIEGRYATAL	15.89	2447.37	22	0.6	816.797	3	46.5	264000	3	869159	F3:17733	No	FL1029_IPP114_PB_CB_vivax_2_even.raw	sp|P48047|ATPO_HUMAN ATP synthase subunit O mitochondrial OS=Homo sapiens OX=9606 GN=ATP5PO PE=1 SV=1			PEAKS DB
FAKSKQV	32.88	806.465	7	-0.6	404.24	2	21.92	1790000	14	882905	F14:8332	No	FL1029_IPP114_PB_CB_vivax_8_odd.raw	tr|A5JZ82|A5JZ82_PLAVS 60S ribosomal protein L24 putative OS=Plasmodium vivax (strain Salvador I) OX=126793 GN=PVX_122285 PE=4 SV=1			PEAKS DB
FAKSKQVNM(+15.99)AKTK	35.33	1495.82	13	2.9	748.918	2	20.66	624000	14	882423	F14:7850	No	FL1029_IPP114_PB_CB_vivax_8_odd.raw	tr|A5JZ82|A5JZ82_PLAVS 60S ribosomal protein L24 putative OS=Plasmodium vivax (strain Salvador I) OX=126793 GN=PVX_122285 PE=4 SV=1	Oxidation (M)	M9:Oxidation (M):1000.00	PEAKS PTM
FAKSKQVNMAKTK	24.55	1479.82	13	0.6	494.282	3	23.26	364000	14	883318	F14:8844	No	FL1029_IPP114_PB_CB_vivax_8_odd.raw	tr|A5JZ82|A5JZ82_PLAVS 60S ribosomal protein L24 putative OS=Plasmodium vivax (strain Salvador I) OX=126793 GN=PVX_122285 PE=4 SV=1			PEAKS DB
FASFEAQGALANIAVDK	32.2	1750.89	17	-0.2	876.452	2	49.23	177000	30	934235	F30:17781	No	FL1189_IPP114_PB_CB_vivax_6_odd.raw	sp|P01903|DRA_HUMAN HLA class II histocompatibility antigen DR alpha chain OS=Homo sapiens OX=9606 GN=HLA-DRA PE=1 SV=1			PEAKS DB
FAYDGKDYI	21.57	1090.5	9	0.4	546.256	2	42.87		14	890278	F14:16386	No	FL1029_IPP114_PB_CB_vivax_8_odd.raw	sp|P30475|1B39_HUMAN HLA class I histocompatibility antigen B-39 alpha chain OS=Homo sapiens OX=9606 GN=HLA-B PE=1 SV=1:sp|Q29836|1B67_HUMAN HLA class I histocompatibility antigen B-67 alpha chain OS=Homo sapiens OX=9606 GN=HLA-B PE=1 SV=1:sp|Q95365|1B38_HUMAN HLA class I histocompatibility antigen B-38 alpha chain OS=Homo sapiens OX=9606 GN=HLA-B PE=1 SV=1:sp|P30462|1B14_HUMAN HLA class I histoc…			PEAKS DB
FAYDGKDYL	21.57	1090.5	9	0.4	546.256	2	42.87		14	890278	F14:16386	No	FL1029_IPP114_PB_CB_vivax_8_odd.raw	sp|P13747|HLAE_HUMAN HLA class I histocompatibility antigen alpha chain E OS=Homo sapiens OX=9606 GN=HLA-E PE=1 SV=4			PEAKS DB
FAYDGKDYLTL	15.03	1304.63	11	-0.8	653.321	2	49.53	151000	32	1019907	F32:17874	No	FL1189b_IPP114_PB_CB_vivax_6_odd.raw	sp|P13747|HLAE_HUMAN HLA class I histocompatibility antigen alpha chain E OS=Homo sapiens OX=9606 GN=HLA-E PE=1 SV=4			PEAKS DB
FDNQIHEADTTENQSG	39.27	1804.75	16	-0.6	903.382	2	32.08	605000	31	993792	F31:11582	No	FL1189b_IPP114_PB_CB_vivax_6_even.raw	sp|P05023|AT1A1_HUMAN Sodium/potassium-transporting ATPase subunit alpha-1 OS=Homo sapiens OX=9606 GN=ATP1A1 PE=1 SV=1			PEAKS DB
FDNQIHEADTTENQSGV	44.43	1903.82	17	-0.6	952.916	2	35.67	547000	32	1015357	F32:12895	No	FL1189b_IPP114_PB_CB_vivax_6_odd.raw	sp|P05023|AT1A1_HUMAN Sodium/potassium-transporting ATPase subunit alpha-1 OS=Homo sapiens OX=9606 GN=ATP1A1 PE=1 SV=1			PEAKS DB
FDNQIHEADTTENQSGVS	30.48	1990.85	18	0.5	996.433	2	34.12	502000	32	1014843	F32:12350	No	FL1189b_IPP114_PB_CB_vivax_6_odd.raw	sp|P05023|AT1A1_HUMAN Sodium/potassium-transporting ATPase subunit alpha-1 OS=Homo sapiens OX=9606 GN=ATP1A1 PE=1 SV=1			PEAKS DB
FDSRGNPTVEVD	23.07	1334.61	12	2.4	668.314	2	34.85	150000	11	640611	F11:13268	No	FL1029_IPP114_PB_CB_vivax_7_even.raw	sp|P06733|ENOA_HUMAN Alpha-enolase OS=Homo sapiens OX=9606 GN=ENO1 PE=1 SV=2			PEAKS DB
FEGEDEDEGE	19.78	1154.39	10	1.9	578.203	2	48.68		32	1019637	F32:17581	No	FL1189b_IPP114_PB_CB_vivax_6_odd.raw	tr|A5K0U8|A5K0U8_PLAVS Aspartyl protease putative OS=Plasmodium vivax (strain Salvador I) OX=126793 GN=PVX_085030 PE=3 SV=1			PEAKS DB
FERNFIAQGPYENRTV	18.98	1939.95	16	0.5	647.659	3	39.25	129000	32	1016536	F32:14205	No	FL1189b_IPP114_PB_CB_vivax_6_odd.raw	sp|P21281|VATB2_HUMAN V-type proton ATPase subunit B brain isoform OS=Homo sapiens OX=9606 GN=ATP6V1B2 PE=1 SV=3			PEAKS DB
FERNKAIKVIIA	18.01	1400.85	12	-0.4	467.957	3	34.24	1240000	31	994509	F31:12359	No	FL1189b_IPP114_PB_CB_vivax_6_even.raw	sp|P32248|CCR7_HUMAN C-C chemokine receptor type 7 OS=Homo sapiens OX=9606 GN=CCR7 PE=2 SV=2			PEAKS DB
FESSGAGKIGLG	15.73	1121.57	12	0.5	561.793	2	37.22	180000	32	1015862	F32:13471	No	FL1189b_IPP114_PB_CB_vivax_6_odd.raw	sp|P35527|K1C9_HUMAN Keratin type I cytoskeletal 9 OS=Homo sapiens OX=9606 GN=KRT9 PE=1 SV=3			PEAKS DB
FESSGAGKIGLGG	16.14	1178.59	13	0.1	590.304	2	35.42	325000	2	752971	F2:13526	No	FL1029_IPP114_PB_CB_vivax_1_odd.raw	sp|P35527|K1C9_HUMAN Keratin type I cytoskeletal 9 OS=Homo sapiens OX=9606 GN=KRT9 PE=1 SV=3			PEAKS DB
FESSGAGKIGLGGRG	17.24	1391.72	15	0.3	464.913	3	32.05	167000	30	928592	F30:11610	No	FL1189_IPP114_PB_CB_vivax_6_odd.raw	sp|P35527|K1C9_HUMAN Keratin type I cytoskeletal 9 OS=Homo sapiens OX=9606 GN=KRT9 PE=1 SV=3			PEAKS DB
FESSGAGKIGLGGRGG	28.92	1448.74	16	0	483.92	3	31.84	256000	32	1014088	F32:11526	No	FL1189b_IPP114_PB_CB_vivax_6_odd.raw	sp|P35527|K1C9_HUMAN Keratin type I cytoskeletal 9 OS=Homo sapiens OX=9606 GN=KRT9 PE=1 SV=3			PEAKS DB
FESSGAGKIGLGGRGGS(-.98)	17.37	1534.79	17	0.9	512.603	3	29.65	202000	2	750960	F2:11303	No	FL1029_IPP114_PB_CB_vivax_1_odd.raw	sp|P35527|K1C9_HUMAN Keratin type I cytoskeletal 9 OS=Homo sapiens OX=9606 GN=KRT9 PE=1 SV=3	Amidation	S17:Amidation:1000.00	PEAKS PTM
FESSGAGKIGLGGRGGSG	23.69	1592.79	18	-1.1	531.937	3	30.74		12	683953	F12:11735	No	FL1029_IPP114_PB_CB_vivax_7_odd.raw	sp|P35527|K1C9_HUMAN Keratin type I cytoskeletal 9 OS=Homo sapiens OX=9606 GN=KRT9 PE=1 SV=3			PEAKS DB
FESSGAGKIGLGGRGGSG(-.98)	28.49	1591.81	18	2	531.611	3	29.59	136000	12	683579	F12:11298	No	FL1029_IPP114_PB_CB_vivax_7_odd.raw	sp|P35527|K1C9_HUMAN Keratin type I cytoskeletal 9 OS=Homo sapiens OX=9606 GN=KRT9 PE=1 SV=3	Amidation	G18:Amidation:1000.00	PEAKS PTM
FESSGAGKIGLGGRGGSGG	19.96	1649.81	19	0	550.945	3	30.67	386000	14	885951	F14:11684	No	FL1029_IPP114_PB_CB_vivax_8_odd.raw	sp|P35527|K1C9_HUMAN Keratin type I cytoskeletal 9 OS=Homo sapiens OX=9606 GN=KRT9 PE=1 SV=3			PEAKS DB
FFDSFGNLSSASAIM(+15.99)GNPK	37.47	2004.92	19	2.8	1003.47	2	47.77	279000	14	892042	F14:18284	No	FL1029_IPP114_PB_CB_vivax_8_odd.raw	sp|P69892|HBG2_HUMAN Hemoglobin subunit gamma-2 OS=Homo sapiens OX=9606 GN=HBG2 PE=1 SV=2:sp|P69891|HBG1_HUMAN Hemoglobin subunit gamma-1 OS=Homo sapiens OX=9606 GN=HBG1 PE=1 SV=2	Oxidation (M)	M15:Oxidation (M):1000.00	PEAKS PTM
FFDSFGNLSSASAIMGNPK	49.95	1988.93	19	0.5	995.473	2	50.26	538000	13	978504	F13:19257	No	FL1029_IPP114_PB_CB_vivax_8_even.raw	sp|P69892|HBG2_HUMAN Hemoglobin subunit gamma-2 OS=Homo sapiens OX=9606 GN=HBG2 PE=1 SV=2:sp|P69891|HBG1_HUMAN Hemoglobin subunit gamma-1 OS=Homo sapiens OX=9606 GN=HBG1 PE=1 SV=2			PEAKS DB
FFESFGDLSTPDAVM(+15.99)GNPK	32.76	2073.94	19	-1.4	1037.97	2	49.54	178000	32	1019912	F32:17887	No	FL1189b_IPP114_PB_CB_vivax_6_odd.raw	sp|P68871|HBB_HUMAN Hemoglobin subunit beta OS=Homo sapiens OX=9606 GN=HBB PE=1 SV=2	Oxidation (M)	M15:Oxidation (M):1000.00	PEAKS PTM
FGGPRDQGSRHDSE	16.58	1543.68	14	-0.2	515.566	3	23.08	312000	3	860847	F3:8740	No	FL1029_IPP114_PB_CB_vivax_2_even.raw	sp|P35637|FUS_HUMAN RNA-binding protein FUS OS=Homo sapiens OX=9606 GN=FUS PE=1 SV=1			PEAKS DB
FGGQTKPV	35.71	832.444	8	-1.3	417.229	2	27.82	494000	14	884942	F14:10587	No	FL1029_IPP114_PB_CB_vivax_8_odd.raw	tr|A5KB61|A5KB61_PLAVS 60S Ribosomal protein L44 putative OS=Plasmodium vivax (strain Salvador I) OX=126793 GN=PVX_119345 PE=3 SV=1			PEAKS DB
FGGQTKPVFKKKAKTTK	17.19	1893.12	17	-1.3	474.287	4	24	375000	14	883592	F14:9131	No	FL1029_IPP114_PB_CB_vivax_8_odd.raw	tr|A5KB61|A5KB61_PLAVS 60S Ribosomal protein L44 putative OS=Plasmodium vivax (strain Salvador I) OX=126793 GN=PVX_119345 PE=3 SV=1			PEAKS DB
FGLIKLDLKTKSEN	16.25	1604.91	14	-0.9	535.978	3	40.82	215000	32	1017044	F32:14760	No	FL1189b_IPP114_PB_CB_vivax_6_odd.raw	sp|P21796|VDAC1_HUMAN Voltage-dependent anion-selective channel protein 1 OS=Homo sapiens OX=9606 GN=VDAC1 PE=1 SV=2			PEAKS DB
FHPLGADSQV	32.38	1069.52	10	0.8	535.767	2	36.49	1460000	14	888020	F14:13906	No	FL1029_IPP114_PB_CB_vivax_8_odd.raw	sp|P11166|GTR1_HUMAN Solute carrier family 2 facilitated glucose transporter member 1 OS=Homo sapiens OX=9606 GN=SLC2A1 PE=1 SV=2			PEAKS DB
FIGKKKKDIFVIINNL	16.38	1889.15	16	0.9	473.295	4	44.54		3	868471	F3:17031	No	FL1029_IPP114_PB_CB_vivax_2_even.raw	tr|A5K4N4|A5K4N4_PLAVS Uncharacterized protein OS=Plasmodium vivax (strain Salvador I) OX=126793 GN=PVX_091735 PE=4 SV=1			PEAKS DB
FIVLVKVK	22.5	944.642	8	-1.9	473.327	2	52.36	48600	13	979290	F13:20059	No	FL1029_IPP114_PB_CB_vivax_8_even.raw	sp|Q14571|ITPR2_HUMAN Inositol 1 4 5-trisphosphate receptor type 2 OS=Homo sapiens OX=9606 GN=ITPR2 PE=1 SV=2:sp|Q14643|ITPR1_HUMAN Inositol 1 4 5-trisphosphate receptor type 1 OS=Homo sapiens OX=9606 GN=ITPR1 PE=1 SV=3			PEAKS DB
FKKKAKTTKKIVLK	22.67	1660.11	14	2.4	554.38	3	23.27	3360000	13	968899	F13:8831	No	FL1029_IPP114_PB_CB_vivax_8_even.raw	tr|A5KB61|A5KB61_PLAVS 60S Ribosomal protein L44 putative OS=Plasmodium vivax (strain Salvador I) OX=126793 GN=PVX_119345 PE=3 SV=1			PEAKS DB
FKLAQAY	19.86	839.454	7	-0.3	420.734	2	37.44	480000	11	641502	F11:14290	No	FL1029_IPP114_PB_CB_vivax_7_even.raw	sp|P20930|FILA_HUMAN Filaggrin OS=Homo sapiens OX=9606 GN=FLG PE=1 SV=3			PEAKS DB
FKLNKKA	19.53	847.528	7	0.8	424.772	2	23.92	383000	3	861184	F3:9063	No	FL1029_IPP114_PB_CB_vivax_2_even.raw	sp|P10412|H14_HUMAN Histone H1.4 OS=Homo sapiens OX=9606 GN=HIST1H1E PE=1 SV=2:sp|P16401|H15_HUMAN Histone H1.5 OS=Homo sapiens OX=9606 GN=HIST1H1B PE=1 SV=3:sp|P16403|H12_HUMAN Histone H1.2 OS=Homo sapiens OX=9606 GN=HIST1H1C PE=1 SV=2:sp|P16402|H13_HUMAN Histone H1.3 OS=Homo sapiens OX=9606 GN=HIST1H1D PE=1 SV=2:sp|Q02539|H11_HUMAN Histone H1.1 OS=Homo sapiens OX=9606 GN=HIST1H1A PE=1 SV=3			PEAKS DB
FKLNKKAA	25	918.565	8	0.2	307.196	3	24.32	479000	3	861291	F3:9213	No	FL1029_IPP114_PB_CB_vivax_2_even.raw	sp|P10412|H14_HUMAN Histone H1.4 OS=Homo sapiens OX=9606 GN=HIST1H1E PE=1 SV=2:sp|P16401|H15_HUMAN Histone H1.5 OS=Homo sapiens OX=9606 GN=HIST1H1B PE=1 SV=3:sp|P16403|H12_HUMAN Histone H1.2 OS=Homo sapiens OX=9606 GN=HIST1H1C PE=1 SV=2:sp|P16402|H13_HUMAN Histone H1.3 OS=Homo sapiens OX=9606 GN=HIST1H1D PE=1 SV=2			PEAKS DB
FKLNKKAAS	25.66	1005.6	9	-0.8	336.206	3	24.09	545000	3	861224	F3:9124	No	FL1029_IPP114_PB_CB_vivax_2_even.raw	sp|P10412|H14_HUMAN Histone H1.4 OS=Homo sapiens OX=9606 GN=HIST1H1E PE=1 SV=2:sp|P16401|H15_HUMAN Histone H1.5 OS=Homo sapiens OX=9606 GN=HIST1H1B PE=1 SV=3:sp|P16403|H12_HUMAN Histone H1.2 OS=Homo sapiens OX=9606 GN=HIST1H1C PE=1 SV=2:sp|P16402|H13_HUMAN Histone H1.3 OS=Homo sapiens OX=9606 GN=HIST1H1D PE=1 SV=2			PEAKS DB
FKSPDDPSRYISPDQ	16.21	1750.82	15	0.2	584.613	3	37.31	98400	11	641458	F11:14228	No	FL1029_IPP114_PB_CB_vivax_7_even.raw	sp|P06733|ENOA_HUMAN Alpha-enolase OS=Homo sapiens OX=9606 GN=ENO1 PE=1 SV=2			PEAKS DB
FKSPDDPSRYISPDQL	19.75	1863.9	16	-0.2	622.307	3	42.77	148000	12	688221	F12:16354	No	FL1029_IPP114_PB_CB_vivax_7_odd.raw	sp|P06733|ENOA_HUMAN Alpha-enolase OS=Homo sapiens OX=9606 GN=ENO1 PE=1 SV=2			PEAKS DB
FKSPDDPSRYISPDQLAD	16.86	2049.96	18	1.4	684.33	3	42.47	233000	11	643318	F11:16202	No	FL1029_IPP114_PB_CB_vivax_7_even.raw	sp|P06733|ENOA_HUMAN Alpha-enolase OS=Homo sapiens OX=9606 GN=ENO1 PE=1 SV=2			PEAKS DB
FKSPDDPSRYISPDQLADL	26.81	2163.05	19	0	722.023	3	48.39	399000	11	645408	F11:18479	No	FL1029_IPP114_PB_CB_vivax_7_even.raw	sp|P06733|ENOA_HUMAN Alpha-enolase OS=Homo sapiens OX=9606 GN=ENO1 PE=1 SV=2			PEAKS DB
FLASVSTVLTSK	24.9	1251.71	12	0.3	626.861	2	46.62	273000	32	1018960	F32:16850	No	FL1189b_IPP114_PB_CB_vivax_6_odd.raw	sp|P69905|HBA_HUMAN Hemoglobin subunit alpha OS=Homo sapiens OX=9606 GN=HBA1 PE=1 SV=2			PEAKS DB
FLFEPVVKA	16.61	1048.6	9	-1.8	525.304	2	47.67		13	977595	F13:18260	No	FL1029_IPP114_PB_CB_vivax_8_even.raw	sp|Q6IN85|P4R3A_HUMAN Serine/threonine-protein phosphatase 4 regulatory subunit 3A OS=Homo sapiens OX=9606 GN=PPP4R3A PE=1 SV=1			PEAKS DB
FLFSCDMCET	16.44	1194.44	10	-4.7	598.224	2	48.79		31	999277	F31:17581	No	FL1189b_IPP114_PB_CB_vivax_6_even.raw	sp|O15060|ZBT39_HUMAN Zinc finger and BTB domain-containing protein 39 OS=Homo sapiens OX=9606 GN=ZBTB39 PE=1 SV=1			PEAKS DB
FLTAAKKARAG	25.17	1132.67	11	1.2	567.344	2	25.31	281000	11	637184	F11:9601	No	FL1029_IPP114_PB_CB_vivax_7_even.raw	sp|Q9NZT1|CALL5_HUMAN Calmodulin-like protein 5 OS=Homo sapiens OX=9606 GN=CALML5 PE=1 SV=2			PEAKS DB
FNEKSKE	16.71	880.429	7	0.9	441.222	2	21.17	364000	14	882586	F14:8033	No	FL1029_IPP114_PB_CB_vivax_8_odd.raw	sp|P13645|K1C10_HUMAN Keratin type I cytoskeletal 10 OS=Homo sapiens OX=9606 GN=KRT10 PE=1 SV=6:#DECOY#tr|A5K0M9|A5K0M9_PLAVS Uncharacterized protein OS=Plasmodium vivax (strain Salvador I) OX=126793 GN=PVX_084680 PE=4 SV=1			PEAKS DB
FNEKSKEL	21.5	993.513	8	-0.3	497.764	2	27.07	229000	32	1012496	F32:9784	No	FL1189b_IPP114_PB_CB_vivax_6_odd.raw	sp|P13645|K1C10_HUMAN Keratin type I cytoskeletal 10 OS=Homo sapiens OX=9606 GN=KRT10 PE=1 SV=6			PEAKS DB
FPEHIFPAL	19.51	1069.56	9	1.9	535.788	2	49.99	378000	13	978397	F13:19162	No	FL1029_IPP114_PB_CB_vivax_8_even.raw	sp|P61160|ARP2_HUMAN Actin-related protein 2 OS=Homo sapiens OX=9606 GN=ACTR2 PE=1 SV=1			PEAKS DB
FPGSEDVKL	19.6	990.502	9	0.7	496.259	2	40.35	414000	7	799635	F7:15385	No	FL1029_IPP114_PB_CB_vivax_4_even.raw	sp|P11926|DCOR_HUMAN Ornithine decarboxylase OS=Homo sapiens OX=9606 GN=ODC1 PE=1 SV=2			PEAKS DB
FQAM(+15.99)NKEL	31.61	995.475	8	1.1	498.745	2	29.69	665000	12	683613	F12:11330	No	FL1029_IPP114_PB_CB_vivax_7_odd.raw	sp|P15924|DESP_HUMAN Desmoplakin OS=Homo sapiens OX=9606 GN=DSP PE=1 SV=3	Oxidation (M)	M4:Oxidation (M):1000.00	PEAKS PTM
FRAAVPSGAS	23.03	961.498	10	-1	481.756	2	32.54	237000	31	993937	F31:11752	No	FL1189b_IPP114_PB_CB_vivax_6_even.raw	sp|P06733|ENOA_HUMAN Alpha-enolase OS=Homo sapiens OX=9606 GN=ENO1 PE=1 SV=2:sp|P09104|ENOG_HUMAN Gamma-enolase OS=Homo sapiens OX=9606 GN=ENO2 PE=1 SV=3:sp|P13929|ENOB_HUMAN Beta-enolase OS=Homo sapiens OX=9606 GN=ENO3 PE=1 SV=5:tr|A5K7I5|A5K7I5_PLAVS Enolase putative OS=Plasmodium vivax (strain Salvador I) OX=126793 GN=PVX_095015 PE=3 SV=1			PEAKS DB
FRAAVPSGAST	23.2	1062.55	11	-0.7	532.28	2	33.14	258000	31	994144	F31:11973	No	FL1189b_IPP114_PB_CB_vivax_6_even.raw	sp|P06733|ENOA_HUMAN Alpha-enolase OS=Homo sapiens OX=9606 GN=ENO1 PE=1 SV=2:sp|P09104|ENOG_HUMAN Gamma-enolase OS=Homo sapiens OX=9606 GN=ENO2 PE=1 SV=3:sp|P13929|ENOB_HUMAN Beta-enolase OS=Homo sapiens OX=9606 GN=ENO3 PE=1 SV=5:tr|A5K7I5|A5K7I5_PLAVS Enolase putative OS=Plasmodium vivax (strain Salvador I) OX=126793 GN=PVX_095015 PE=3 SV=1			PEAKS DB
FRAAVPSGASTG	19.97	1119.57	12	-0.2	560.791	2	32.97	130000	31	994080	F31:11913	No	FL1189b_IPP114_PB_CB_vivax_6_even.raw	sp|P06733|ENOA_HUMAN Alpha-enolase OS=Homo sapiens OX=9606 GN=ENO1 PE=1 SV=2:sp|P09104|ENOG_HUMAN Gamma-enolase OS=Homo sapiens OX=9606 GN=ENO2 PE=1 SV=3:sp|P13929|ENOB_HUMAN Beta-enolase OS=Homo sapiens OX=9606 GN=ENO3 PE=1 SV=5:tr|A5K7I5|A5K7I5_PLAVS Enolase putative OS=Plasmodium vivax (strain Salvador I) OX=126793 GN=PVX_095015 PE=3 SV=1			PEAKS DB
FRAAVPSGASTGIY	27.14	1395.71	14	2.2	698.866	2	39.88	354000	11	642397	F11:15206	No	FL1029_IPP114_PB_CB_vivax_7_even.raw	sp|P06733|ENOA_HUMAN Alpha-enolase OS=Homo sapiens OX=9606 GN=ENO1 PE=1 SV=2:sp|P09104|ENOG_HUMAN Gamma-enolase OS=Homo sapiens OX=9606 GN=ENO2 PE=1 SV=3:sp|P13929|ENOB_HUMAN Beta-enolase OS=Homo sapiens OX=9606 GN=ENO3 PE=1 SV=5:tr|A5K7I5|A5K7I5_PLAVS Enolase putative OS=Plasmodium vivax (strain Salvador I) OX=126793 GN=PVX_095015 PE=3 SV=1			PEAKS DB
FRAAVPSGASTGIYE	22.99	1524.76	15	0.7	763.386	2	39.51	157000	11	642265	F11:15081	No	FL1029_IPP114_PB_CB_vivax_7_even.raw	sp|P06733|ENOA_HUMAN Alpha-enolase OS=Homo sapiens OX=9606 GN=ENO1 PE=1 SV=2:sp|P09104|ENOG_HUMAN Gamma-enolase OS=Homo sapiens OX=9606 GN=ENO2 PE=1 SV=3:sp|P13929|ENOB_HUMAN Beta-enolase OS=Homo sapiens OX=9606 GN=ENO3 PE=1 SV=5:tr|A5K7I5|A5K7I5_PLAVS Enolase putative OS=Plasmodium vivax (strain Salvador I) OX=126793 GN=PVX_095015 PE=3 SV=1			PEAKS DB
FRQILKNPDDPD	15.46	1456.73	12	-0.7	486.584	3	34.06	98500	30	929249	F30:12342	No	FL1189_IPP114_PB_CB_vivax_6_odd.raw	sp|P20930|FILA_HUMAN Filaggrin OS=Homo sapiens OX=9606 GN=FLG PE=1 SV=3			PEAKS DB
FRSGKYD	15.11	871.419	7	-2	436.716	2	24.5	404000	11	636896	F11:9295	No	FL1029_IPP114_PB_CB_vivax_7_even.raw	sp|P06733|ENOA_HUMAN Alpha-enolase OS=Homo sapiens OX=9606 GN=ENO1 PE=1 SV=2			PEAKS DB
FRSGKYDLD	21.44	1099.53	9	1	550.773	2	30.66	2510000	12	683924	F12:11680	No	FL1029_IPP114_PB_CB_vivax_7_odd.raw	sp|P06733|ENOA_HUMAN Alpha-enolase OS=Homo sapiens OX=9606 GN=ENO1 PE=1 SV=2			PEAKS DB
FRVPTANVS	15.04	989.529	9	0	495.772	2	37.85	366000	32	1016070	F32:13680	No	FL1189b_IPP114_PB_CB_vivax_6_odd.raw	sp|P04406|G3P_HUMAN Glyceraldehyde-3-phosphate dehydrogenase OS=Homo sapiens OX=9606 GN=GAPDH PE=1 SV=3			PEAKS DB
FRVPTANVSVVD	25.87	1302.69	12	0.7	652.354	2	43.01	1180000	11	643499	F11:16407	No	FL1029_IPP114_PB_CB_vivax_7_even.raw	sp|P04406|G3P_HUMAN Glyceraldehyde-3-phosphate dehydrogenase OS=Homo sapiens OX=9606 GN=GAPDH PE=1 SV=3			PEAKS DB
FRVPTANVSVVDL	24.17	1415.78	13	1.2	708.897	2	49.06	376000	11	645625	F11:18713	No	FL1029_IPP114_PB_CB_vivax_7_even.raw	sp|P04406|G3P_HUMAN Glyceraldehyde-3-phosphate dehydrogenase OS=Homo sapiens OX=9606 GN=GAPDH PE=1 SV=3			PEAKS DB
FSATALGF	16.45	812.407	8	-0.5	407.211	2	36.11		7	798167	F7:13780	No	FL1029_IPP114_PB_CB_vivax_4_even.raw	sp|P27338|AOFB_HUMAN Amine oxidase [flavin-containing] B OS=Homo sapiens OX=9606 GN=MAOB PE=1 SV=3			PEAKS DB
FSGNPIKVS	22.62	947.508	9	0.5	474.761	2	34.37	269000	4	819939	F4:13133	No	FL1029_IPP114_PB_CB_vivax_2_odd.raw	sp|P35637|FUS_HUMAN RNA-binding protein FUS OS=Homo sapiens OX=9606 GN=FUS PE=1 SV=1			PEAKS DB
FSGNPIKVSF	36.31	1094.58	10	-0.2	548.295	2	44.17	230000	4	823421	F4:16937	No	FL1029_IPP114_PB_CB_vivax_2_odd.raw	sp|P35637|FUS_HUMAN RNA-binding protein FUS OS=Homo sapiens OX=9606 GN=FUS PE=1 SV=1			PEAKS DB
FSNALEPDFKATSIT	34.62	1639.81	15	1.1	820.913	2	47.13	741000	32	1019128	F32:17029	No	FL1189b_IPP114_PB_CB_vivax_6_odd.raw	sp|Q14118|DAG1_HUMAN Dystroglycan OS=Homo sapiens OX=9606 GN=DAG1 PE=1 SV=2			PEAKS DB
FSNALEPDFKATSITVT	36.34	1839.93	17	0	920.97	2	49.02	931000	32	1019732	F32:17690	No	FL1189b_IPP114_PB_CB_vivax_6_odd.raw	sp|Q14118|DAG1_HUMAN Dystroglycan OS=Homo sapiens OX=9606 GN=DAG1 PE=1 SV=2			PEAKS DB
FTHCTEHC	15.37	976.353	8	-3	489.182	2	40.92		6	952859	F6:15693	No	FL1029_IPP114_PB_CB_vivax_3_odd.raw	tr|A5KB28|A5KB28_PLAVS Uncharacterized protein OS=Plasmodium vivax (strain Salvador I) OX=126793 GN=PVX_098060 PE=4 SV=1			PEAKS DB
FTISRDNAK	23.21	1050.55	9	-0.1	526.28	2	28.18	344000	32	1012868	F32:10186	No	FL1189b_IPP114_PB_CB_vivax_6_odd.raw	sp|P01763|HV348_HUMAN Immunoglobulin heavy variable 3-48 OS=Homo sapiens OX=9606 GN=IGHV3-48 PE=1 SV=2:sp|A0A0B4J1V1|HV321_HUMAN Immunoglobulin heavy variable 3-21 OS=Homo sapiens OX=9606 GN=IGHV3-21 PE=1 SV=1:sp|A0A0C4DH32|HV320_HUMAN Immunoglobulin heavy variable 3-20 OS=Homo sapiens OX=9606 GN=IGHV3-20 PE=3 SV=2:sp|P01780|HV307_HUMAN Immunoglobulin heavy variable 3-7 OS=Homo sapiens OX=9606 GN…			PEAKS DB
FTKTEEL	27.99	866.438	7	1.1	434.227	2	30.85		11	639173	F11:11740	No	FL1029_IPP114_PB_CB_vivax_7_even.raw	sp|P02533|K1C14_HUMAN Keratin type I cytoskeletal 14 OS=Homo sapiens OX=9606 GN=KRT14 PE=1 SV=4			PEAKS DB
FTKVKPLL	20.24	944.606	8	0.2	473.31	2	34.28	140000	11	640410	F11:13065	No	FL1029_IPP114_PB_CB_vivax_7_even.raw	sp|P35579|MYH9_HUMAN Myosin-9 OS=Homo sapiens OX=9606 GN=MYH9 PE=1 SV=4:sp|Q7Z406|MYH14_HUMAN Myosin-14 OS=Homo sapiens OX=9606 GN=MYH14 PE=1 SV=2:sp|P35749|MYH11_HUMAN Myosin-11 OS=Homo sapiens OX=9606 GN=MYH11 PE=1 SV=3:sp|P35580|MYH10_HUMAN Myosin-10 OS=Homo sapiens OX=9606 GN=MYH10 PE=1 SV=3			PEAKS DB
FVDTAQRKEPEDGRLVQF	17.52	2134.08	18	1.7	534.528	4	36.77	148000	12	686082	F12:14087	No	FL1029_IPP114_PB_CB_vivax_7_odd.raw	sp|Q13867|BLMH_HUMAN Bleomycin hydrolase OS=Homo sapiens OX=9606 GN=BLMH PE=1 SV=1			PEAKS DB
FVRFDSDAASPR	17.07	1366.66	12	0.6	456.562	3	33.95	132000	32	1014786	F32:12294	No	FL1189b_IPP114_PB_CB_vivax_6_odd.raw	sp|Q29940|1B59_HUMAN HLA class I histocompatibility antigen B-59 alpha chain OS=Homo sapiens OX=9606 GN=HLA-B PE=1 SV=1:sp|P01889|1B07_HUMAN HLA class I histocompatibility antigen B-7 alpha chain OS=Homo sapiens OX=9606 GN=HLA-B PE=1 SV=3:sp|P30475|1B39_HUMAN HLA class I histocompatibility antigen B-39 alpha chain OS=Homo sapiens OX=9606 GN=HLA-B PE=1 SV=1:sp|Q29836|1B67_HUMAN HLA class I histoco…			PEAKS DB
FVRFDSDAASQR	31.8	1397.67	12	-0.1	466.897	3	32.83	287000	32	1014409	F32:11880	No	FL1189b_IPP114_PB_CB_vivax_6_odd.raw	sp|P13746|1A11_HUMAN HLA class I histocompatibility antigen A-11 alpha chain OS=Homo sapiens OX=9606 GN=HLA-A PE=1 SV=1:sp|P04439|1A03_HUMAN HLA class I histocompatibility antigen A-3 alpha chain OS=Homo sapiens OX=9606 GN=HLA-A PE=1 SV=2:sp|P16188|1A30_HUMAN HLA class I histocompatibility antigen A-30 alpha chain OS=Homo sapiens OX=9606 GN=HLA-A PE=1 SV=2:sp|P05534|1A24_HUMAN HLA class I histoco…			PEAKS DB
FVSTTYSGVTR	18.63	1216.61	11	1	609.312	2	33.63	111000	9	730071	F9:12824	No	FL1029_IPP114_PB_CB_vivax_6_even.raw	sp|P04264|K2C1_HUMAN Keratin type II cytoskeletal 1 OS=Homo sapiens OX=9606 GN=KRT1 PE=1 SV=6			PEAKS DB
FVTIKKD	16.91	849.496	7	0.5	425.755	2	27.61	185000	9	727703	F9:10493	No	FL1029_IPP114_PB_CB_vivax_6_even.raw	sp|P04264|K2C1_HUMAN Keratin type II cytoskeletal 1 OS=Homo sapiens OX=9606 GN=KRT1 PE=1 SV=6			PEAKS DB
FVTLKKD	16.91	849.496	7	0.5	425.755	2	27.61	185000	9	727703	F9:10493	No	FL1029_IPP114_PB_CB_vivax_6_even.raw	sp|P35908|K22E_HUMAN Keratin type II cytoskeletal 2 epidermal OS=Homo sapiens OX=9606 GN=KRT2 PE=1 SV=2:sp|P04259|K2C6B_HUMAN Keratin type II cytoskeletal 6B OS=Homo sapiens OX=9606 GN=KRT6B PE=1 SV=5:sp|P48668|K2C6C_HUMAN Keratin type II cytoskeletal 6C OS=Homo sapiens OX=9606 GN=KRT6C PE=1 SV=3:sp|P02538|K2C6A_HUMAN Keratin type II cytoskeletal 6A OS=Homo sapiens OX=9606 GN=KRT6A PE=1 SV=3:sp|P…			PEAKS DB
FYGRFSSP	15.39	959.45	8	-0.4	480.732	2	37.32	63600	30	930324	F30:13517	No	FL1189_IPP114_PB_CB_vivax_6_odd.raw	sp|P48594|SPB4_HUMAN Serpin B4 OS=Homo sapiens OX=9606 GN=SERPINB4 PE=1 SV=2:sp|P29508|SPB3_HUMAN Serpin B3 OS=Homo sapiens OX=9606 GN=SERPINB3 PE=1 SV=2			PEAKS DB
FYKRKM(+15.99)DKKKRN	17.73	1656.92	12	1.6	553.316	3	20.09	989000	13	967757	F13:7611	No	FL1029_IPP114_PB_CB_vivax_8_even.raw	tr|A5K1E3|A5K1E3_PLAVS 40S ribosomal protein S8 OS=Plasmodium vivax (strain Salvador I) OX=126793 GN=PVX_086020 PE=3 SV=1	Oxidation (M)	M6:Oxidation (M):1000.00	PEAKS PTM
FYNQVSTPLLR	42.17	1336.71	11	2.1	669.366	2	42.63	231000	14	890201	F14:16288	No	FL1029_IPP114_PB_CB_vivax_8_odd.raw	sp|P19823|ITIH2_HUMAN Inter-alpha-trypsin inhibitor heavy chain H2 OS=Homo sapiens OX=9606 GN=ITIH2 PE=1 SV=2			PEAKS DB
G(+27.99)EEASGSGGGYGGGSGKSSHS	37.29	1838.73	21	2.2	920.375	2	24.97	399000	11	637068	F11:9492	No	FL1029_IPP114_PB_CB_vivax_7_even.raw	sp|P35527|K1C9_HUMAN Keratin type I cytoskeletal 9 OS=Homo sapiens OX=9606 GN=KRT9 PE=1 SV=3	Formylation	G1:Formylation:93.52	PEAKS PTM
G(+27.99)EVGPAGPNGFAGPA	15.99	1324.6	15	-2.9	663.308	2	26.35	127000	30	926706	F30:9554	No	FL1189_IPP114_PB_CB_vivax_6_odd.raw	sp|P08123|CO1A2_HUMAN Collagen alpha-2(I) chain OS=Homo sapiens OX=9606 GN=COL1A2 PE=1 SV=7	Formylation	G1:Formylation:1000.00	PEAKS PTM
G(+27.99)GEEASGSGGGYGGGSGKSSHS	35.49	1895.75	22	1.7	948.885	2	25	270000	11	637080	F11:9498	No	FL1029_IPP114_PB_CB_vivax_7_even.raw	sp|P35527|K1C9_HUMAN Keratin type I cytoskeletal 9 OS=Homo sapiens OX=9606 GN=KRT9 PE=1 SV=3	Formylation	G1:Formylation:110.48	PEAKS PTM
G(+27.99)GGEEASGSGGGYGGGSGKSSHS	36.36	1952.77	23	1.9	977.396	2	25	227000	11	637073	F11:9496	No	FL1029_IPP114_PB_CB_vivax_7_even.raw	sp|P35527|K1C9_HUMAN Keratin type I cytoskeletal 9 OS=Homo sapiens OX=9606 GN=KRT9 PE=1 SV=3	Formylation	G1:Formylation:71.89	PEAKS PTM
G(+42.01)AAKPRKPAG	22.51	993.572	10	0.6	497.793	2	20.95	42700	9	725334	F9:7941	No	FL1029_IPP114_PB_CB_vivax_6_even.raw	sp|P16402|H13_HUMAN Histone H1.3 OS=Homo sapiens OX=9606 GN=HIST1H1D PE=1 SV=2	Acetylation (N-term)	G1:Acetylation (N-term):1000.00	PEAKS PTM
G(+42.01)ARGAPGPA	15.64	794.403	9	-1.3	398.209	2	23.87	538000	31	991057	F31:8611	No	FL1189b_IPP114_PB_CB_vivax_6_even.raw	sp|P12109|CO6A1_HUMAN Collagen alpha-1(VI) chain OS=Homo sapiens OX=9606 GN=COL6A1 PE=1 SV=3	Acetylation (N-term)	G1:Acetylation (N-term):1000.00	PEAKS PTM
G(+42.01)GGGGGGLGSGGSIR	28.4	1186.57	15	0.1	594.292	2	28.54	110000	11	638347	F11:10856	No	FL1029_IPP114_PB_CB_vivax_7_even.raw	sp|P35527|K1C9_HUMAN Keratin type I cytoskeletal 9 OS=Homo sapiens OX=9606 GN=KRT9 PE=1 SV=3	Acetylation (Protein N-term)	G1:Acetylation (Protein N-term):1000.00	PEAKS PTM
G(+42.01)N(+.98)AGPAGPAGPR	28.98	1063.5	12	0.1	532.76	2	26.35	348000	32	1012247	F32:9519	No	FL1189b_IPP114_PB_CB_vivax_6_odd.raw	sp|P08123|CO1A2_HUMAN Collagen alpha-2(I) chain OS=Homo sapiens OX=9606 GN=COL1A2 PE=1 SV=7	Acetylation (N-term); Deamidation (NQ)	G1:Acetylation (N-term):1000.00;N2:Deamidation (NQ):1000.00	PEAKS PTM
GAATPKKSAKKTPKKAKKPA	26.04	2035.26	20	1.3	509.824	4	20.72	382000	8	702828	F8:7849	No	FL1029_IPP114_PB_CB_vivax_4_odd.raw	sp|P10412|H14_HUMAN Histone H1.4 OS=Homo sapiens OX=9606 GN=HIST1H1E PE=1 SV=2			PEAKS DB
GAAVVITI	16.02	742.459	8	3.7	372.238	2	41.21		13	975285	F13:15777	No	FL1029_IPP114_PB_CB_vivax_8_even.raw	sp|Q9NU53|GINM1_HUMAN Glycoprotein integral membrane protein 1 OS=Homo sapiens OX=9606 GN=GINM1 PE=2 SV=1			PEAKS DB
GADGS(-15.99)PGKDGV	17.77	942.441	11	-0.2	472.228	2	26.8	1350000	29	906496	F29:9654	No	FL1189_IPP114_PB_CB_vivax_6_even.raw	sp|P02452|CO1A1_HUMAN Collagen alpha-1(I) chain OS=Homo sapiens OX=9606 GN=COL1A1 PE=1 SV=5	Deoxy	S5:Deoxy:34.30	PEAKS PTM
GADKEKKQLY	34.14	1178.63	10	-0.6	393.884	3	24.17	837000	14	883653	F14:9179	No	FL1029_IPP114_PB_CB_vivax_8_odd.raw	tr|A5K303|A5K303_PLAVS 60S ribosomal protein L23a putative OS=Plasmodium vivax (strain Salvador I) OX=126793 GN=PVX_116700 PE=3 SV=1			PEAKS DB
GADKKKKGAVY	20.01	1163.67	11	-0.1	388.896	3	20.9	1010000	13	968058	F13:7932	No	FL1029_IPP114_PB_CB_vivax_8_even.raw	tr|A5KB61|A5KB61_PLAVS 60S Ribosomal protein L44 putative OS=Plasmodium vivax (strain Salvador I) OX=126793 GN=PVX_119345 PE=3 SV=1			PEAKS DB
GAFGKPNGV	18.98	845.439	9	1.1	423.728	2	30.55	463000	11	639065	F11:11624	No	FL1029_IPP114_PB_CB_vivax_7_even.raw	tr|A5K186|A5K186_PLAVS 60S ribosomal protein L10 putative OS=Plasmodium vivax (strain Salvador I) OX=126793 GN=PVX_085735 PE=4 SV=1			PEAKS DB
GAGGGFGSR	20.01	764.356	9	-0.4	383.185	2	25.63	118000	32	1012016	F32:9265	No	FL1189b_IPP114_PB_CB_vivax_6_odd.raw	sp|P04264|K2C1_HUMAN Keratin type II cytoskeletal 1 OS=Homo sapiens OX=9606 GN=KRT1 PE=1 SV=6			PEAKS DB
GAGGGFGSRS	25.87	851.389	10	0.1	426.702	2	25	484000	11	637081	F11:9491	No	FL1029_IPP114_PB_CB_vivax_7_even.raw	sp|P04264|K2C1_HUMAN Keratin type II cytoskeletal 1 OS=Homo sapiens OX=9606 GN=KRT1 PE=1 SV=6			PEAKS DB
GAHKFDL	15.27	786.402	7	-3.6	394.207	2	33.58		11	640152	F11:12791	No	FL1029_IPP114_PB_CB_vivax_7_even.raw	tr|A5K9P1|A5K9P1_PLAVS MATH domain-containing protein OS=Plasmodium vivax (strain Salvador I) OX=126793 GN=PVX_080660 PE=4 SV=1			PEAKS DB
GAPGDKGESGPSGPAGPT	15.81	1537.7	18	-0.7	769.857	2	27.87	243000	31	992408	F31:10098	No	FL1189b_IPP114_PB_CB_vivax_6_even.raw	sp|P02452|CO1A1_HUMAN Collagen alpha-1(I) chain OS=Homo sapiens OX=9606 GN=COL1A1 PE=1 SV=5			PEAKS DB
GASCGESADQSGD	22.5	1182.41	13	-0.8	592.212	2	32.75		13	972270	F13:12499	No	FL1029_IPP114_PB_CB_vivax_8_even.raw	tr|A5K103|A5K103_PLAVS Uncharacterized protein OS=Plasmodium vivax (strain Salvador I) OX=126793 GN=PVX_085310 PE=4 SV=1			PEAKS DB
GAVHDVK	15.33	724.387	7	0.6	363.201	2	20.75	124000	4	815117	F4:7888	No	FL1029_IPP114_PB_CB_vivax_2_odd.raw	sp|P81605|DCD_HUMAN Dermcidin OS=Homo sapiens OX=9606 GN=DCD PE=1 SV=2			PEAKS DB
GAVHDVKD	20.9	839.414	8	-0.2	420.714	2	21.52	61100	32	1010669	F32:7761	No	FL1189b_IPP114_PB_CB_vivax_6_odd.raw	sp|P81605|DCD_HUMAN Dermcidin OS=Homo sapiens OX=9606 GN=DCD PE=1 SV=2			PEAKS DB
GAYM(+15.99)TKVD	19.51	899.406	8	1.2	450.711	2	26.65	288000	14	884522	F14:10146	No	FL1029_IPP114_PB_CB_vivax_8_odd.raw	sp|P04264|K2C1_HUMAN Keratin type II cytoskeletal 1 OS=Homo sapiens OX=9606 GN=KRT1 PE=1 SV=6	Oxidation (M)	M4:Oxidation (M):1000.00	PEAKS PTM
GAYM(+15.99)TKVDLQAKLD	32.84	1567.79	14	0.2	523.605	3	35.76	272000	5	775520	F5:13659	No	FL1029_IPP114_PB_CB_vivax_3_even.raw	sp|P04264|K2C1_HUMAN Keratin type II cytoskeletal 1 OS=Homo sapiens OX=9606 GN=KRT1 PE=1 SV=6	Oxidation (M)	M4:Oxidation (M):1000.00	PEAKS PTM
GC(+119.00)DVGPDGRLLRGHD	36.86	1684.74	15	0.4	562.588	3	30.62	420000	32	1013671	F32:11075	No	FL1189b_IPP114_PB_CB_vivax_6_odd.raw	sp|P01889|1B07_HUMAN HLA class I histocompatibility antigen B-7 alpha chain OS=Homo sapiens OX=9606 GN=HLA-B PE=1 SV=3:sp|P18465|1B57_HUMAN HLA class I histocompatibility antigen B-57 alpha chain OS=Homo sapiens OX=9606 GN=HLA-B PE=1 SV=1:sp|P30484|1B46_HUMAN HLA class I histocompatibility antigen B-46 alpha chain OS=Homo sapiens OX=9606 GN=HLA-B PE=1 SV=1:sp|P30464|1B15_HUMAN HLA class I histoco…	Cysteinylation	C2:Cysteinylation:1000.00	PEAKS PTM
GC(+119.00)DVGPDGRLLRGHDQ	36.55	1812.8	16	0.2	605.274	3	30.1	1060000	32	1013501	F32:10874	No	FL1189b_IPP114_PB_CB_vivax_6_odd.raw	sp|P01889|1B07_HUMAN HLA class I histocompatibility antigen B-7 alpha chain OS=Homo sapiens OX=9606 GN=HLA-B PE=1 SV=3:sp|P18465|1B57_HUMAN HLA class I histocompatibility antigen B-57 alpha chain OS=Homo sapiens OX=9606 GN=HLA-B PE=1 SV=1:sp|P30484|1B46_HUMAN HLA class I histocompatibility antigen B-46 alpha chain OS=Homo sapiens OX=9606 GN=HLA-B PE=1 SV=1:sp|P30464|1B15_HUMAN HLA class I histoco…	Cysteinylation	C2:Cysteinylation:1000.00	PEAKS PTM
GC(+119.00)DVGPDGRLLRGHDQY	35.16	1975.86	17	0	659.628	3	33.07	681000	30	928921	F30:11960	No	FL1189_IPP114_PB_CB_vivax_6_odd.raw	sp|P01889|1B07_HUMAN HLA class I histocompatibility antigen B-7 alpha chain OS=Homo sapiens OX=9606 GN=HLA-B PE=1 SV=3	Cysteinylation	C2:Cysteinylation:1000.00	PEAKS PTM
GCVFCDP	16.43	739.267	7	2.5	740.276	1	13.22	55100	14	879949	F14:4324	No	FL1029_IPP114_PB_CB_vivax_8_odd.raw	sp|O95985|TOP3B_HUMAN DNA topoisomerase 3-beta-1 OS=Homo sapiens OX=9606 GN=TOP3B PE=1 SV=1			PEAKS DB
GDAGPAGPK	19.51	768.377	9	1	385.196	2	22.58	102000	29	905070	F29:8158	No	FL1189_IPP114_PB_CB_vivax_6_even.raw	sp|P02452|CO1A1_HUMAN Collagen alpha-1(I) chain OS=Homo sapiens OX=9606 GN=COL1A1 PE=1 SV=5			PEAKS DB
GDGVTHTVPIYEG	20.63	1343.64	13	0.8	672.826	2	38.14	95500	11	641751	F11:14551	No	FL1029_IPP114_PB_CB_vivax_7_even.raw	sp|P63261|ACTG_HUMAN Actin cytoplasmic 2 OS=Homo sapiens OX=9606 GN=ACTG1 PE=1 SV=1:sp|P60709|ACTB_HUMAN Actin cytoplasmic 1 OS=Homo sapiens OX=9606 GN=ACTB PE=1 SV=1:sp|A5A3E0|POTEF_HUMAN POTE ankyrin domain family member F OS=Homo sapiens OX=9606 GN=POTEF PE=1 SV=2:sp|Q6S8J3|POTEE_HUMAN POTE ankyrin domain family member E OS=Homo sapiens OX=9606 GN=POTEE PE=2 SV=3			PEAKS DB
GDIHAITAANNL	15.48	1208.62	12	-1.1	605.314	2	40.55	155000	32	1016954	F32:14665	No	FL1189b_IPP114_PB_CB_vivax_6_odd.raw	sp|P11586|C1TC_HUMAN C-1-tetrahydrofolate synthase cytoplasmic OS=Homo sapiens OX=9606 GN=MTHFD1 PE=1 SV=3:sp|Q6UB35|C1TM_HUMAN Monofunctional C1-tetrahydrofolate synthase mitochondrial OS=Homo sapiens OX=9606 GN=MTHFD1L PE=1 SV=1			PEAKS DB
GDIHAITAANNLV	19.39	1307.68	13	-1	654.848	2	44.48	139000	31	997870	F31:16051	No	FL1189b_IPP114_PB_CB_vivax_6_even.raw	sp|P11586|C1TC_HUMAN C-1-tetrahydrofolate synthase cytoplasmic OS=Homo sapiens OX=9606 GN=MTHFD1 PE=1 SV=3			PEAKS DB
GDIHAITAANNLVA	19.26	1378.72	14	-0.6	690.367	2	43.91	142000	31	997682	F31:15848	No	FL1189b_IPP114_PB_CB_vivax_6_even.raw	sp|P11586|C1TC_HUMAN C-1-tetrahydrofolate synthase cytoplasmic OS=Homo sapiens OX=9606 GN=MTHFD1 PE=1 SV=3			PEAKS DB
GDLASEIR	17.98	859.44	8	-0.6	430.727	2	33.65	393000	2	752336	F2:12827	No	FL1029_IPP114_PB_CB_vivax_1_odd.raw	sp|P0DPA2|VSIG8_HUMAN V-set and immunoglobulin domain-containing protein 8 OS=Homo sapiens OX=9606 GN=VSIG8 PE=2 SV=1			PEAKS DB
GDRVRIL	25.99	827.498	7	-1.4	414.755	2	31.54	872000	14	886262	F14:12010	No	FL1029_IPP114_PB_CB_vivax_8_odd.raw	tr|A5K584|A5K584_PLAVS 60S ribosomal protein L33-B putative OS=Plasmodium vivax (strain Salvador I) OX=126793 GN=PVX_092735 PE=3 SV=1			PEAKS DB
GDRVRILMYPSNI	16.05	1532.81	13	-0.6	511.945	3	44.17	531000	14	890763	F14:16867	No	FL1029_IPP114_PB_CB_vivax_8_odd.raw	tr|A5K584|A5K584_PLAVS 60S ribosomal protein L33-B putative OS=Plasmodium vivax (strain Salvador I) OX=126793 GN=PVX_092735 PE=3 SV=1			PEAKS DB
GDSDLQLDRISVYYNEA	40.24	1956.91	17	-2.2	979.458	2	49.39	1040000	32	1019859	F32:17838	No	FL1189b_IPP114_PB_CB_vivax_6_odd.raw	sp|P07437|TBB5_HUMAN Tubulin beta chain OS=Homo sapiens OX=9606 GN=TUBB PE=1 SV=2			PEAKS DB
GDTELSGRF	23.54	980.456	9	-0.1	491.235	2	35.27	366000	4	820261	F4:13493	No	FL1029_IPP114_PB_CB_vivax_2_odd.raw	tr|A5K3E2|A5K3E2_PLAVS 50S ribosomal protein S28e putative OS=Plasmodium vivax (strain Salvador I) OX=126793 GN=PVX_117390 PE=3 SV=1			PEAKS DB
GDTELSGRFL	29.13	1093.54	10	0.5	547.778	2	42.05		13	975580	F13:16097	No	FL1029_IPP114_PB_CB_vivax_8_even.raw	tr|A5K3E2|A5K3E2_PLAVS 50S ribosomal protein S28e putative OS=Plasmodium vivax (strain Salvador I) OX=126793 GN=PVX_117390 PE=3 SV=1			PEAKS DB
GDTELSGRFLI	22.14	1206.62	11	1.1	604.32	2	47.66		12	689960	F12:18233	No	FL1029_IPP114_PB_CB_vivax_7_odd.raw	tr|A5K3E2|A5K3E2_PLAVS 50S ribosomal protein S28e putative OS=Plasmodium vivax (strain Salvador I) OX=126793 GN=PVX_117390 PE=3 SV=1			PEAKS DB
GDVNVEINVAPGKD	26.79	1425.71	14	0.4	713.862	2	38.59	101000	2	754055	F2:14758	No	FL1029_IPP114_PB_CB_vivax_1_odd.raw	sp|P35527|K1C9_HUMAN Keratin type I cytoskeletal 9 OS=Homo sapiens OX=9606 GN=KRT9 PE=1 SV=3			PEAKS DB
GDVVHGFYNPAVSRIV	32.03	1728.89	16	0.8	577.306	3	46	307000	30	933202	F30:16648	No	FL1189_IPP114_PB_CB_vivax_6_odd.raw	sp|P98194|AT2C1_HUMAN Calcium-transporting ATPase type 2C member 1 OS=Homo sapiens OX=9606 GN=ATP2C1 PE=1 SV=3			PEAKS DB
GDVVHGFYNPAVSRIVE	28.51	1857.94	17	0.2	620.32	3	45.44	339000	32	1018573	F32:16430	No	FL1189b_IPP114_PB_CB_vivax_6_odd.raw	sp|P98194|AT2C1_HUMAN Calcium-transporting ATPase type 2C member 1 OS=Homo sapiens OX=9606 GN=ATP2C1 PE=1 SV=3			PEAKS DB
GEDDPGHWD	16.79	1026.37	9	2.1	514.192	2	41.45		5	777582	F5:15874	No	FL1029_IPP114_PB_CB_vivax_3_even.raw	sp|Q96S55|WRIP1_HUMAN ATPase WRNIP1 OS=Homo sapiens OX=9606 GN=WRNIP1 PE=1 SV=2			PEAKS DB
GEDPGLAR	19.86	813.398	8	-0.9	407.706	2	26.77	329000	9	727396	F9:10170	No	FL1029_IPP114_PB_CB_vivax_6_even.raw	sp|P81605|DCD_HUMAN Dermcidin OS=Homo sapiens OX=9606 GN=DCD PE=1 SV=2			PEAKS DB
GEEASGSGGGYGGGSGKSS	44.22	1586.64	19	3	794.332	2	23.48	357000	11	636542	F11:8921	No	FL1029_IPP114_PB_CB_vivax_7_even.raw	sp|P35527|K1C9_HUMAN Keratin type I cytoskeletal 9 OS=Homo sapiens OX=9606 GN=KRT9 PE=1 SV=3			PEAKS DB
GEEASGSGGGYGGGSGKSSHS	21.51	1810.74	21	2.2	604.587	3	21.59	116000	2	747912	F2:8200	No	FL1029_IPP114_PB_CB_vivax_1_odd.raw	sp|P35527|K1C9_HUMAN Keratin type I cytoskeletal 9 OS=Homo sapiens OX=9606 GN=KRT9 PE=1 SV=3			PEAKS DB
GEGSSGGGGRGGGSF	25.16	1224.51	15	0.2	613.263	2	25.6	133000	8	704506	F8:9761	No	FL1029_IPP114_PB_CB_vivax_4_odd.raw	sp|P13645|K1C10_HUMAN Keratin type I cytoskeletal 10 OS=Homo sapiens OX=9606 GN=KRT10 PE=1 SV=6			PEAKS DB
GEIDGNKVTL	20.59	1044.55	10	0.2	523.28	2	36.79	307000	14	888130	F14:14048	No	FL1029_IPP114_PB_CB_vivax_8_odd.raw	sp|P19338|NUCL_HUMAN Nucleolin OS=Homo sapiens OX=9606 GN=NCL PE=1 SV=3			PEAKS DB
GEP(+31.99)GPPGPAGA	22.95	937.414	11	0.6	469.715	2	29.64	310000	29	907453	F29:10678	No	FL1189_IPP114_PB_CB_vivax_6_even.raw	sp|P02452|CO1A1_HUMAN Collagen alpha-1(I) chain OS=Homo sapiens OX=9606 GN=COL1A1 PE=1 SV=5	Dihydroxy	P3:Dihydroxy:0.00	PEAKS PTM
GESGNKGEPGSAGPQGPPGPSGEEG	21.41	2234.97	25	-0.7	1118.49	2	29.55	74400	31	992971	F31:10699	No	FL1189b_IPP114_PB_CB_vivax_6_even.raw	sp|P08123|CO1A2_HUMAN Collagen alpha-2(I) chain OS=Homo sapiens OX=9606 GN=COL1A2 PE=1 SV=7			PEAKS DB
GESSGFGHHES	22.14	1129.44	11	0.7	565.729	2	22.98	232000	11	636358	F11:8719	No	FL1029_IPP114_PB_CB_vivax_7_even.raw	sp|Q86YZ3|HORN_HUMAN Hornerin OS=Homo sapiens OX=9606 GN=HRNR PE=1 SV=2			PEAKS DB
GESSSKGPRY	18.63	1066.5	10	0.2	534.26	2	23.09	163000	9	726047	F9:8751	No	FL1029_IPP114_PB_CB_vivax_6_even.raw	sp|P13645|K1C10_HUMAN Keratin type I cytoskeletal 10 OS=Homo sapiens OX=9606 GN=KRT10 PE=1 SV=6			PEAKS DB
GETNPADSKPGTIRGDF	15.58	1760.83	17	1.6	587.952	3	33.3	83200	11	640050	F11:12700	No	FL1029_IPP114_PB_CB_vivax_7_even.raw	sp|P22392|NDKB_HUMAN Nucleoside diphosphate kinase B OS=Homo sapiens OX=9606 GN=NME2 PE=1 SV=1:sp|P15531|NDKA_HUMAN Nucleoside diphosphate kinase A OS=Homo sapiens OX=9606 GN=NME1 PE=1 SV=1			PEAKS DB
GEVDPKVAL	15.25	926.507	9	-0.6	464.261	2	37.36	136000	14	888331	F14:14269	No	FL1029_IPP114_PB_CB_vivax_8_odd.raw	sp|P17568|NDUB7_HUMAN NADH dehydrogenase [ubiquinone] 1 beta subcomplex subunit 7 OS=Homo sapiens OX=9606 GN=NDUFB7 PE=1 SV=4			PEAKS DB
GFGARAR	15.34	733.398	7	-0.4	367.706	2	22.51	126000	3	860647	F3:8513	No	FL1029_IPP114_PB_CB_vivax_2_even.raw	sp|A6NHQ2|FBLL1_HUMAN rRNA/tRNA 2'-O-methyltransferase fibrillarin-like protein 1 OS=Homo sapiens OX=9606 GN=FBLL1 PE=3 SV=2			PEAKS DB
GFGGGSFRGSYGSS	20.55	1321.57	14	2.6	661.793	2	35.19	127000	10	663274	F10:13403	No	FL1029_IPP114_PB_CB_vivax_6_odd.raw	sp|P13645|K1C10_HUMAN Keratin type I cytoskeletal 10 OS=Homo sapiens OX=9606 GN=KRT10 PE=1 SV=6			PEAKS DB
GFGGQTKPVFKKKAKTTK	38.39	1950.14	18	-0.5	488.542	4	24.44	1110000	14	883744	F14:9286	No	FL1029_IPP114_PB_CB_vivax_8_odd.raw	tr|A5KB61|A5KB61_PLAVS 60S Ribosomal protein L44 putative OS=Plasmodium vivax (strain Salvador I) OX=126793 GN=PVX_119345 PE=3 SV=1			PEAKS DB
GFGGQTKPVFKKKAKTTKK	26.4	2078.24	19	-0.5	520.566	4	24.2	1420000	14	883666	F14:9166	No	FL1029_IPP114_PB_CB_vivax_8_odd.raw	tr|A5KB61|A5KB61_PLAVS 60S Ribosomal protein L44 putative OS=Plasmodium vivax (strain Salvador I) OX=126793 GN=PVX_119345 PE=3 SV=1			PEAKS DB
GFGGQTKPVFKKKAKTTKKIVLK	19.49	2531.57	23	1.1	633.9	4	29.15	973000	13	970983	F13:11216	No	FL1029_IPP114_PB_CB_vivax_8_even.raw	tr|A5KB61|A5KB61_PLAVS 60S Ribosomal protein L44 putative OS=Plasmodium vivax (strain Salvador I) OX=126793 GN=PVX_119345 PE=3 SV=1			PEAKS DB
GFGHHES	24.72	769.314	7	-1.5	385.664	2	21.46	369000	11	635835	F11:8127	No	FL1029_IPP114_PB_CB_vivax_7_even.raw	sp|Q86YZ3|HORN_HUMAN Hornerin OS=Homo sapiens OX=9606 GN=HRNR PE=1 SV=2			PEAKS DB
GFM(+15.99)IGQTPPPAPPPPPPP	16.93	1809.91	18	4.1	905.967	2	49.94		7	803025	F7:19128	No	FL1029_IPP114_PB_CB_vivax_4_even.raw	sp|Q9C0D6|FHDC1_HUMAN FH2 domain-containing protein 1 OS=Homo sapiens OX=9606 GN=FHDC1 PE=1 SV=2	Oxidation (M)	M3:Oxidation (M):1000.00	PEAKS PTM
GFPSGGGGGGGQQR	15.97	1217.55	14	0.3	609.784	2	26.03	378000	3	861891	F3:9876	No	FL1029_IPP114_PB_CB_vivax_2_even.raw	sp|P35637|FUS_HUMAN RNA-binding protein FUS OS=Homo sapiens OX=9606 GN=FUS PE=1 SV=1			PEAKS DB
GFSGGSF	18.87	657.276	7	1.5	658.284	1	40.6	354000	10	665155	F10:15499	No	FL1029_IPP114_PB_CB_vivax_6_odd.raw	sp|P13645|K1C10_HUMAN Keratin type I cytoskeletal 10 OS=Homo sapiens OX=9606 GN=KRT10 PE=1 SV=6			PEAKS DB
GFSGGVG	16.07	579.265	7	2.6	580.274	1	32.16	1900000	2	751841	F2:12263	No	FL1029_IPP114_PB_CB_vivax_1_odd.raw	sp|Q9HB15|KCNKC_HUMAN Potassium channel subfamily K member 12 OS=Homo sapiens OX=9606 GN=KCNK12 PE=2 SV=1			PEAKS DB
GGAGPVGGQGPRG	24.91	1065.53	13	1.7	533.774	2	25.28	161000	4	816697	F4:9645	No	FL1029_IPP114_PB_CB_vivax_2_odd.raw	sp|P23246|SFPQ_HUMAN Splicing factor proline- and glutamine-rich OS=Homo sapiens OX=9606 GN=SFPQ PE=1 SV=2			PEAKS DB
GGEEASGSGGGYGGGSGKSS	46.1	1643.67	20	2.8	822.842	2	23.65	353000	11	636608	F11:8985	No	FL1029_IPP114_PB_CB_vivax_7_even.raw	sp|P35527|K1C9_HUMAN Keratin type I cytoskeletal 9 OS=Homo sapiens OX=9606 GN=KRT9 PE=1 SV=3			PEAKS DB
GGESGGSYGGGEEASGSGG	16.42	1557.58	19	-0.9	779.797	2	24.88	119000	4	816568	F4:9473	No	FL1029_IPP114_PB_CB_vivax_2_odd.raw	sp|P35527|K1C9_HUMAN Keratin type I cytoskeletal 9 OS=Homo sapiens OX=9606 GN=KRT9 PE=1 SV=3			PEAKS DB
GGFGGGSFRGSYGSS	30.79	1378.59	15	2	690.304	2	35.39	355000	10	663339	F10:13481	No	FL1029_IPP114_PB_CB_vivax_6_odd.raw	sp|P13645|K1C10_HUMAN Keratin type I cytoskeletal 10 OS=Homo sapiens OX=9606 GN=KRT10 PE=1 SV=6			PEAKS DB
GGFGGRGGGFGGGS	17.19	1125.5	14	-2.4	563.754	2	31.85		10	662162	F10:12152	No	FL1029_IPP114_PB_CB_vivax_6_odd.raw	sp|P35908|K22E_HUMAN Keratin type II cytoskeletal 2 epidermal OS=Homo sapiens OX=9606 GN=KRT2 PE=1 SV=2			PEAKS DB
GGGEEASGSGGGYGGGSGK	49.06	1526.62	19	2.8	764.321	2	23.76	383000	11	636649	F11:9016	No	FL1029_IPP114_PB_CB_vivax_7_even.raw	sp|P35527|K1C9_HUMAN Keratin type I cytoskeletal 9 OS=Homo sapiens OX=9606 GN=KRT9 PE=1 SV=3			PEAKS DB
GGGEEASGSGGGYGGGSGKSS	61.78	1700.69	21	2.3	851.353	2	23.76	491000	11	636642	F11:9018	No	FL1029_IPP114_PB_CB_vivax_7_even.raw	sp|P35527|K1C9_HUMAN Keratin type I cytoskeletal 9 OS=Homo sapiens OX=9606 GN=KRT9 PE=1 SV=3			PEAKS DB
GGGFGSR	18.71	636.298	7	-1.8	319.156	2	24.06	133000	11	636747	F11:9141	No	FL1029_IPP114_PB_CB_vivax_7_even.raw	sp|P04264|K2C1_HUMAN Keratin type II cytoskeletal 1 OS=Homo sapiens OX=9606 GN=KRT1 PE=1 SV=6:sp|P35908|K22E_HUMAN Keratin type II cytoskeletal 2 epidermal OS=Homo sapiens OX=9606 GN=KRT2 PE=1 SV=2			PEAKS DB
GGGFGSRS	17.99	723.33	8	1.8	362.673	2	24.03	424000	11	636736	F11:9121	No	FL1029_IPP114_PB_CB_vivax_7_even.raw	sp|P04264|K2C1_HUMAN Keratin type II cytoskeletal 1 OS=Homo sapiens OX=9606 GN=KRT1 PE=1 SV=6:sp|P35908|K22E_HUMAN Keratin type II cytoskeletal 2 epidermal OS=Homo sapiens OX=9606 GN=KRT2 PE=1 SV=2			PEAKS DB
GGGFSSGGFSGGSFSRG	27.06	1506.65	17	1.3	754.333	2	39.61	80100	32	1016658	F32:14339	No	FL1189b_IPP114_PB_CB_vivax_6_odd.raw	sp|P13645|K1C10_HUMAN Keratin type I cytoskeletal 10 OS=Homo sapiens OX=9606 GN=KRT10 PE=1 SV=6			PEAKS DB
GGGFSSGGFSGGSFSRGSSGGG(-.98)	27.21	1850.79	22	0	926.404	2	37.19	128000	32	1015852	F32:13473	No	FL1189b_IPP114_PB_CB_vivax_6_odd.raw	sp|P13645|K1C10_HUMAN Keratin type I cytoskeletal 10 OS=Homo sapiens OX=9606 GN=KRT10 PE=1 SV=6	Amidation	G22:Amidation:1000.00	PEAKS PTM
GGGGGGFGGGGFGSR	20.37	1182.52	15	3.1	592.267	2	32.69	212000	10	662420	F10:12468	No	FL1029_IPP114_PB_CB_vivax_6_odd.raw	sp|P35908|K22E_HUMAN Keratin type II cytoskeletal 2 epidermal OS=Homo sapiens OX=9606 GN=KRT2 PE=1 SV=2			PEAKS DB
GGGGGGFRG	19.55	720.33	9	-0.9	361.172	2	24.42	225000	8	704073	F8:9297	No	FL1029_IPP114_PB_CB_vivax_4_odd.raw	sp|P35908|K22E_HUMAN Keratin type II cytoskeletal 2 epidermal OS=Homo sapiens OX=9606 GN=KRT2 PE=1 SV=2:sp|Q9NY12|GAR1_HUMAN H/ACA ribonucleoprotein complex subunit 1 OS=Homo sapiens OX=9606 GN=GAR1 PE=1 SV=1			PEAKS DB
GGGGGGGGGGGRRRDS	33.1	1315.61	16	4	658.814	2	32.9	412000	11	639909	F11:12510	No	FL1029_IPP114_PB_CB_vivax_7_even.raw	sp|Q13595|TRA2A_HUMAN Transformer-2 protein homolog alpha OS=Homo sapiens OX=9606 GN=TRA2A PE=1 SV=1			PEAKS DB
GGGGGGGLGSGGSIR	33.88	1144.56	15	0.6	573.287	2	29.18	486000	32	1013192	F32:10538	No	FL1189b_IPP114_PB_CB_vivax_6_odd.raw	sp|P35527|K1C9_HUMAN Keratin type I cytoskeletal 9 OS=Homo sapiens OX=9606 GN=KRT9 PE=1 SV=3			PEAKS DB
GGGGGGGLGSGGSIRSS	30.16	1318.62	17	0.4	660.319	2	29.04	212000	32	1013150	F32:10502	No	FL1189b_IPP114_PB_CB_vivax_6_odd.raw	sp|P35527|K1C9_HUMAN Keratin type I cytoskeletal 9 OS=Homo sapiens OX=9606 GN=KRT9 PE=1 SV=3			PEAKS DB
GGGGGGGLGSGGSIRSSY	38.31	1481.69	18	0.2	741.85	2	34.02	303000	32	1014805	F32:12309	No	FL1189b_IPP114_PB_CB_vivax_6_odd.raw	sp|P35527|K1C9_HUMAN Keratin type I cytoskeletal 9 OS=Homo sapiens OX=9606 GN=KRT9 PE=1 SV=3			PEAKS DB
GGGGGGGLGSGGSIRSSYS	17.4	1568.72	19	3.6	785.369	2	32.36	153000	11	639711	F11:12323	No	FL1029_IPP114_PB_CB_vivax_7_even.raw	sp|P35527|K1C9_HUMAN Keratin type I cytoskeletal 9 OS=Homo sapiens OX=9606 GN=KRT9 PE=1 SV=3			PEAKS DB
GGGGGGGRFSSS	35.6	981.426	12	-2.2	491.719	2	23.82	233000	11	636669	F11:9043	No	FL1029_IPP114_PB_CB_vivax_7_even.raw	sp|P35527|K1C9_HUMAN Keratin type I cytoskeletal 9 OS=Homo sapiens OX=9606 GN=KRT9 PE=1 SV=3			PEAKS DB
GGGGGGLGSGGSIR	20.9	1087.54	14	0.4	544.776	2	29.14	93500	32	1013183	F32:10544	No	FL1189b_IPP114_PB_CB_vivax_6_odd.raw	sp|P35527|K1C9_HUMAN Keratin type I cytoskeletal 9 OS=Homo sapiens OX=9606 GN=KRT9 PE=1 SV=3			PEAKS DB
GGGGGGLGSGGSIRS	38.96	1174.57	15	0.1	588.292	2	28.37	601000	11	638281	F11:10787	No	FL1029_IPP114_PB_CB_vivax_7_even.raw	sp|P35527|K1C9_HUMAN Keratin type I cytoskeletal 9 OS=Homo sapiens OX=9606 GN=KRT9 PE=1 SV=3			PEAKS DB
GGGGGGLGSGGSIRSS	21.1	1261.6	16	-0.8	631.807	2	29.1	72600	29	907273	F29:10546	No	FL1189_IPP114_PB_CB_vivax_6_even.raw	sp|P35527|K1C9_HUMAN Keratin type I cytoskeletal 9 OS=Homo sapiens OX=9606 GN=KRT9 PE=1 SV=3			PEAKS DB
GGGGGGLGSGGSIRSSY	34.67	1424.66	17	2	713.341	2	33.03	495000	11	639959	F11:12583	No	FL1029_IPP114_PB_CB_vivax_7_even.raw	sp|P35527|K1C9_HUMAN Keratin type I cytoskeletal 9 OS=Homo sapiens OX=9606 GN=KRT9 PE=1 SV=3			PEAKS DB
GGGGGGRFSSSSGYGGG	25.63	1402.59	17	2.2	702.302	2	28.19	213000	1	840182	F1:10728	No	FL1029_IPP114_PB_CB_vivax_1_even.raw	sp|P35527|K1C9_HUMAN Keratin type I cytoskeletal 9 OS=Homo sapiens OX=9606 GN=KRT9 PE=1 SV=3			PEAKS DB
GGGGGLGSGGSIR	37.94	1030.52	13	2	516.266	2	28.27	2800000	11	638242	F11:10737	No	FL1029_IPP114_PB_CB_vivax_7_even.raw	sp|P35527|K1C9_HUMAN Keratin type I cytoskeletal 9 OS=Homo sapiens OX=9606 GN=KRT9 PE=1 SV=3			PEAKS DB
GGGGGLGSGGSIRS	33.39	1117.55	14	0.6	559.781	2	28.34	413000	11	638268	F11:10773	No	FL1029_IPP114_PB_CB_vivax_7_even.raw	sp|P35527|K1C9_HUMAN Keratin type I cytoskeletal 9 OS=Homo sapiens OX=9606 GN=KRT9 PE=1 SV=3			PEAKS DB
GGGGGLGSGGSIRSS	44.98	1204.58	15	1.5	603.298	2	28.2	1760000	11	638212	F11:10708	No	FL1029_IPP114_PB_CB_vivax_7_even.raw	sp|P35527|K1C9_HUMAN Keratin type I cytoskeletal 9 OS=Homo sapiens OX=9606 GN=KRT9 PE=1 SV=3			PEAKS DB
GGGGGLGSGGSIRSSY	33.36	1367.64	16	1.2	684.83	2	33.06	321000	11	639968	F11:12599	No	FL1029_IPP114_PB_CB_vivax_7_even.raw	sp|P35527|K1C9_HUMAN Keratin type I cytoskeletal 9 OS=Homo sapiens OX=9606 GN=KRT9 PE=1 SV=3			PEAKS DB
GGGGGRFSSSSGYGGG	17.25	1345.56	16	3.2	673.792	2	28.16	145000	1	840168	F1:10722	No	FL1029_IPP114_PB_CB_vivax_1_even.raw	sp|P35527|K1C9_HUMAN Keratin type I cytoskeletal 9 OS=Homo sapiens OX=9606 GN=KRT9 PE=1 SV=3			PEAKS DB
GGGGGRGSYGSGGSSY	18.01	1361.56	16	1.9	681.788	2	26.97	211000	9	727475	F9:10249	No	FL1029_IPP114_PB_CB_vivax_6_even.raw	sp|P04264|K2C1_HUMAN Keratin type II cytoskeletal 1 OS=Homo sapiens OX=9606 GN=KRT1 PE=1 SV=6			PEAKS DB
GGGGGSFGAGGGFGSR	38.72	1283.56	16	-0.1	642.789	2	33.27	154000	11	640037	F11:12673	No	FL1029_IPP114_PB_CB_vivax_7_even.raw	sp|P04264|K2C1_HUMAN Keratin type II cytoskeletal 1 OS=Homo sapiens OX=9606 GN=KRT1 PE=1 SV=6			PEAKS DB
GGGGGSFGAGGGFGSRS	43.16	1370.6	17	2.3	686.307	2	33.07	322000	11	639974	F11:12597	No	FL1029_IPP114_PB_CB_vivax_7_even.raw	sp|P04264|K2C1_HUMAN Keratin type II cytoskeletal 1 OS=Homo sapiens OX=9606 GN=KRT1 PE=1 SV=6			PEAKS DB
GGGGLGSGGSIR	33.53	973.494	12	0.8	487.755	2	28.24	2600000	11	638224	F11:10722	No	FL1029_IPP114_PB_CB_vivax_7_even.raw	sp|P35527|K1C9_HUMAN Keratin type I cytoskeletal 9 OS=Homo sapiens OX=9606 GN=KRT9 PE=1 SV=3			PEAKS DB
GGGGLGSGGSIRS	34.85	1060.53	13	1.4	531.271	2	28.31	370000	11	638251	F11:10759	No	FL1029_IPP114_PB_CB_vivax_7_even.raw	sp|P35527|K1C9_HUMAN Keratin type I cytoskeletal 9 OS=Homo sapiens OX=9606 GN=KRT9 PE=1 SV=3			PEAKS DB
GGGGLGSGGSIRSS	42.91	1147.56	14	0.6	574.787	2	28.17	1640000	11	638202	F11:10694	No	FL1029_IPP114_PB_CB_vivax_7_even.raw	sp|P35527|K1C9_HUMAN Keratin type I cytoskeletal 9 OS=Homo sapiens OX=9606 GN=KRT9 PE=1 SV=3			PEAKS DB
GGGGLGSGGSIRSSY	32.84	1310.62	15	1.7	656.319	2	33.07	282000	11	639976	F11:12598	No	FL1029_IPP114_PB_CB_vivax_7_even.raw	sp|P35527|K1C9_HUMAN Keratin type I cytoskeletal 9 OS=Homo sapiens OX=9606 GN=KRT9 PE=1 SV=3			PEAKS DB
GGGGRFSSSSGYGGG	25.13	1288.54	15	0.8	645.279	2	28.1	174000	1	840132	F1:10701	No	FL1029_IPP114_PB_CB_vivax_1_even.raw	sp|P35527|K1C9_HUMAN Keratin type I cytoskeletal 9 OS=Homo sapiens OX=9606 GN=KRT9 PE=1 SV=3			PEAKS DB
GGGGSFGAGGGFGSR	17.76	1226.54	15	-0.2	614.279	2	33.3	70900	11	640048	F11:12703	No	FL1029_IPP114_PB_CB_vivax_7_even.raw	sp|P04264|K2C1_HUMAN Keratin type II cytoskeletal 1 OS=Homo sapiens OX=9606 GN=KRT1 PE=1 SV=6			PEAKS DB
GGGGSFGAGGGFGSRS	26.04	1313.57	16	1.7	657.796	2	33.07	146000	11	639971	F11:12609	No	FL1029_IPP114_PB_CB_vivax_7_even.raw	sp|P04264|K2C1_HUMAN Keratin type II cytoskeletal 1 OS=Homo sapiens OX=9606 GN=KRT1 PE=1 SV=6			PEAKS DB
GGGGSGGGYGGGSGSRGGSGGSY	39.49	1790.72	23	2	896.369	2	26.59	449000	11	637646	F11:10102	No	FL1029_IPP114_PB_CB_vivax_7_even.raw	sp|P35527|K1C9_HUMAN Keratin type I cytoskeletal 9 OS=Homo sapiens OX=9606 GN=KRT9 PE=1 SV=3			PEAKS DB
GGGLGSGGSIR	28.9	916.473	11	0	459.244	2	28.2	2150000	11	638211	F11:10707	No	FL1029_IPP114_PB_CB_vivax_7_even.raw	sp|P35527|K1C9_HUMAN Keratin type I cytoskeletal 9 OS=Homo sapiens OX=9606 GN=KRT9 PE=1 SV=3			PEAKS DB
GGGLGSGGSIRS	21.38	1003.5	12	0.6	502.76	2	28.27	274000	11	638238	F11:10747	No	FL1029_IPP114_PB_CB_vivax_7_even.raw	sp|P35527|K1C9_HUMAN Keratin type I cytoskeletal 9 OS=Homo sapiens OX=9606 GN=KRT9 PE=1 SV=3			PEAKS DB
GGGLGSGGSIRSS	37.47	1090.54	13	0.1	546.276	2	28.1	1330000	11	638182	F11:10681	No	FL1029_IPP114_PB_CB_vivax_7_even.raw	sp|P35527|K1C9_HUMAN Keratin type I cytoskeletal 9 OS=Homo sapiens OX=9606 GN=KRT9 PE=1 SV=3			PEAKS DB
GGGLGSGGSIRSSY	20.22	1253.6	14	1.8	627.808	2	33.07	159000	11	639970	F11:12601	No	FL1029_IPP114_PB_CB_vivax_7_even.raw	sp|P35527|K1C9_HUMAN Keratin type I cytoskeletal 9 OS=Homo sapiens OX=9606 GN=KRT9 PE=1 SV=3			PEAKS DB
GGGM(+15.99)FNPTKV	36.9	1022.49	10	0.5	512.25	2	32.86	263000	11	639902	F11:12517	No	FL1029_IPP114_PB_CB_vivax_7_even.raw	tr|A5KAZ9|A5KAZ9_PLAVS 60S ribosomal subunit protein L4/L1 putative OS=Plasmodium vivax (strain Salvador I) OX=126793 GN=PVX_097915 PE=4 SV=1	Oxidation (M)	M4:Oxidation (M):1000.00	PEAKS PTM
GGGR(+28.03)GGFPSGGGGGGGQQR	39.58	1629.77	19	1.9	544.266	3	25.23	509000	3	861614	F3:9553	No	FL1029_IPP114_PB_CB_vivax_2_even.raw	sp|P35637|FUS_HUMAN RNA-binding protein FUS OS=Homo sapiens OX=9606 GN=FUS PE=1 SV=1	Dimethylation(KR)	R4:Dimethylation(KR):122.99	PEAKS PTM
GGGRFSSSSGYGGG	15.82	1231.52	14	-0.1	616.768	2	28.06	218000	1	840122	F1:10664	No	FL1029_IPP114_PB_CB_vivax_1_even.raw	sp|P35527|K1C9_HUMAN Keratin type I cytoskeletal 9 OS=Homo sapiens OX=9606 GN=KRT9 PE=1 SV=3			PEAKS DB
GGGSFGAGGGFGSR	19.21	1169.52	14	-0.3	585.768	2	33.3	84600	11	640049	F11:12688	No	FL1029_IPP114_PB_CB_vivax_7_even.raw	sp|P04264|K2C1_HUMAN Keratin type II cytoskeletal 1 OS=Homo sapiens OX=9606 GN=KRT1 PE=1 SV=6			PEAKS DB
GGGSFGAGGGFGSRS	33.43	1256.55	15	1.3	629.285	2	33.07	176000	11	639975	F11:12604	No	FL1029_IPP114_PB_CB_vivax_7_even.raw	sp|P04264|K2C1_HUMAN Keratin type II cytoskeletal 1 OS=Homo sapiens OX=9606 GN=KRT1 PE=1 SV=6			PEAKS DB
GGGSGGGGR(+28.03)GGFPSGGGGGGGQQR	29.34	1944.89	24	0.3	649.304	3	25.36	634000	3	861654	F3:9606	No	FL1029_IPP114_PB_CB_vivax_2_even.raw	sp|P35637|FUS_HUMAN RNA-binding protein FUS OS=Homo sapiens OX=9606 GN=FUS PE=1 SV=1	Dimethylation(KR)	R9:Dimethylation(KR):69.91	PEAKS PTM
GGGSGGGYGGGSGSRGGSG	16.3	1426.58	19	0.3	714.299	2	21.72	204000	6	945902	F6:8270	No	FL1029_IPP114_PB_CB_vivax_3_odd.raw	sp|P35527|K1C9_HUMAN Keratin type I cytoskeletal 9 OS=Homo sapiens OX=9606 GN=KRT9 PE=1 SV=3			PEAKS DB
GGGSRGGGGGGYGSGGSSY	39.22	1532.62	19	0.7	767.32	2	26.86	615000	8	704985	F8:10239	No	FL1029_IPP114_PB_CB_vivax_4_odd.raw	sp|P04264|K2C1_HUMAN Keratin type II cytoskeletal 1 OS=Homo sapiens OX=9606 GN=KRT1 PE=1 SV=6			PEAKS DB
GGGSSGGGSSSGGGYGGGSSSGGHK	47.61	1940.78	25	0.3	647.936	3	20.41	797000	9	725138	F9:7724	No	FL1029_IPP114_PB_CB_vivax_6_even.raw	sp|P13645|K1C10_HUMAN Keratin type I cytoskeletal 10 OS=Homo sapiens OX=9606 GN=KRT10 PE=1 SV=6			PEAKS DB
GGGSSSGGGYGGGSSSGGHK	39.24	1595.66	20	-0.4	532.892	3	20.24	659000	9	725075	F9:7658	No	FL1029_IPP114_PB_CB_vivax_6_even.raw	sp|P13645|K1C10_HUMAN Keratin type I cytoskeletal 10 OS=Homo sapiens OX=9606 GN=KRT10 PE=1 SV=6			PEAKS DB
GGGSSSGGHGGSSSGGY	41.08	1353.52	17	2.2	677.768	2	21.82	2700000	9	725651	F9:8283	No	FL1029_IPP114_PB_CB_vivax_6_even.raw	sp|P13645|K1C10_HUMAN Keratin type I cytoskeletal 10 OS=Homo sapiens OX=9606 GN=KRT10 PE=1 SV=6			PEAKS DB
GGGSSSGGHKSSSSGSVGES	17.1	1693.71	20	1.1	847.865	2	20.07	296000	9	725019	F9:7599	No	FL1029_IPP114_PB_CB_vivax_6_even.raw	sp|P13645|K1C10_HUMAN Keratin type I cytoskeletal 10 OS=Homo sapiens OX=9606 GN=KRT10 PE=1 SV=6			PEAKS DB
GGGYGSGGGSGGRY	21.87	1187.5	14	1.4	594.756	2	26.35	97600	10	660071	F10:10033	No	FL1029_IPP114_PB_CB_vivax_6_odd.raw	sp|P35908|K22E_HUMAN Keratin type II cytoskeletal 2 epidermal OS=Homo sapiens OX=9606 GN=KRT2 PE=1 SV=2			PEAKS DB
GGGYGSGGGSGGRYGSGGGSK(+87.03)GGSI	18.74	2118.93	25	1.5	707.319	3	26.26	318000	8	704755	F8:10011	No	FL1029_IPP114_PB_CB_vivax_4_odd.raw	sp|P35908|K22E_HUMAN Keratin type II cytoskeletal 2 epidermal OS=Homo sapiens OX=9606 GN=KRT2 PE=1 SV=2	Glycidamide adduct	K21:Glycidamide adduct:22.90	PEAKS PTM
GGGYTIRNV	23.59	935.482	9	-0.7	468.748	2	34.08	359000	32	1014828	F32:12337	No	FL1189b_IPP114_PB_CB_vivax_6_odd.raw	sp|Q13547|HDAC1_HUMAN Histone deacetylase 1 OS=Homo sapiens OX=9606 GN=HDAC1 PE=1 SV=1:sp|Q92769|HDAC2_HUMAN Histone deacetylase 2 OS=Homo sapiens OX=9606 GN=HDAC2 PE=1 SV=2:tr|A5K6X2|A5K6X2_PLAVS Histone deacetylase OS=Plasmodium vivax (strain Salvador I) OX=126793 GN=PVX_099700 PE=3 SV=1			PEAKS DB
GGIGTIIG	15.04	686.396	8	-1	344.205	2	24.82		14	883876	F14:9429	No	FL1029_IPP114_PB_CB_vivax_8_odd.raw	sp|O95672|ECEL1_HUMAN Endothelin-converting enzyme-like 1 OS=Homo sapiens OX=9606 GN=ECEL1 PE=1 SV=3			PEAKS DB
GGILTANEKSTM(+15.99)QELN(+.98)	15.61	1721.81	16	1.8	861.916	2	36.85	97600	2	753446	F2:14088	No	FL1029_IPP114_PB_CB_vivax_1_odd.raw	sp|P35527|K1C9_HUMAN Keratin type I cytoskeletal 9 OS=Homo sapiens OX=9606 GN=KRT9 PE=1 SV=3	Oxidation (M); Deamidation (NQ)	M12:Oxidation (M):1000.00;N16:Deamidation (NQ):5.16	PEAKS PTM
GGIQNVGHI	17.65	893.472	9	-0.8	447.743	2	33.81	424000	12	685056	F12:12908	No	FL1029_IPP114_PB_CB_vivax_7_odd.raw	sp|P12268|IMDH2_HUMAN Inosine-5'-monophosphate dehydrogenase 2 OS=Homo sapiens OX=9606 GN=IMPDH2 PE=1 SV=2			PEAKS DB
GGKYAATSQVLLPSKDV	20.41	1732.94	17	-0.3	578.652	3	38.15	127000	29	910248	F29:13804	No	FL1189_IPP114_PB_CB_vivax_6_even.raw	sp|P01871|IGHM_HUMAN Immunoglobulin heavy constant mu OS=Homo sapiens OX=9606 GN=IGHM PE=1 SV=4:sp|P0DOX6|IGM_HUMAN Immunoglobulin mu heavy chain OS=Homo sapiens OX=9606 PE=1 SV=2			PEAKS DB
GGLGSGGSIR	22.4	859.451	10	-0.6	430.733	2	28.17	987000	11	638199	F11:10695	No	FL1029_IPP114_PB_CB_vivax_7_even.raw	sp|P35527|K1C9_HUMAN Keratin type I cytoskeletal 9 OS=Homo sapiens OX=9606 GN=KRT9 PE=1 SV=3			PEAKS DB
GGLGSGGSIRSS	34.3	1033.52	12	-0.1	517.765	2	28.07	535000	11	638170	F11:10670	No	FL1029_IPP114_PB_CB_vivax_7_even.raw	sp|P35527|K1C9_HUMAN Keratin type I cytoskeletal 9 OS=Homo sapiens OX=9606 GN=KRT9 PE=1 SV=3			PEAKS DB
GGLLSGNEKVTM(+15.99)QNLND	27.48	1804.86	17	-0.6	903.438	2	37.35	322000	2	753624	F2:14271	No	FL1029_IPP114_PB_CB_vivax_1_odd.raw	sp|P13645|K1C10_HUMAN Keratin type I cytoskeletal 10 OS=Homo sapiens OX=9606 GN=KRT10 PE=1 SV=6	Oxidation (M)	M12:Oxidation (M):1000.00	PEAKS PTM
GGPGGFGPGGYPGGIH	34.74	1382.64	16	1.5	692.327	2	39.51	109000	11	642264	F11:15090	No	FL1029_IPP114_PB_CB_vivax_7_even.raw	sp|P35908|K22E_HUMAN Keratin type II cytoskeletal 2 epidermal OS=Homo sapiens OX=9606 GN=KRT2 PE=1 SV=2			PEAKS DB
GGPGGFGPGGYPGGIHEV	24.12	1610.75	18	2	806.383	2	41.85	227000	7	800176	F7:15994	No	FL1029_IPP114_PB_CB_vivax_4_even.raw	sp|P35908|K22E_HUMAN Keratin type II cytoskeletal 2 epidermal OS=Homo sapiens OX=9606 GN=KRT2 PE=1 SV=2			PEAKS DB
GGPGGVGGL	22.06	669.345	9	2.2	670.353	1	37.95	376000	10	664213	F10:14498	No	FL1029_IPP114_PB_CB_vivax_6_odd.raw	sp|P35908|K22E_HUMAN Keratin type II cytoskeletal 2 epidermal OS=Homo sapiens OX=9606 GN=KRT2 PE=1 SV=2			PEAKS DB
GGR(+28.03)GGFPSGGGGGGGQQR	35.29	1572.75	18	0.2	525.258	3	25.19	457000	3	861606	F3:9543	No	FL1029_IPP114_PB_CB_vivax_2_even.raw	sp|P35637|FUS_HUMAN RNA-binding protein FUS OS=Homo sapiens OX=9606 GN=FUS PE=1 SV=1	Dimethylation(KR)	R3:Dimethylation(KR):105.90	PEAKS PTM
GGSFGAGGGFGSRS	23.17	1199.53	14	1.4	600.774	2	32.93	99300	11	639923	F11:12550	No	FL1029_IPP114_PB_CB_vivax_7_even.raw	sp|P04264|K2C1_HUMAN Keratin type II cytoskeletal 1 OS=Homo sapiens OX=9606 GN=KRT1 PE=1 SV=6			PEAKS DB
GGSGGGGR(+28.03)GGFPSGGGGGGGQQR	21.35	1887.87	23	2	630.298	3	25.28	132000	4	816698	F4:9663	No	FL1029_IPP114_PB_CB_vivax_2_odd.raw	sp|P35637|FUS_HUMAN RNA-binding protein FUS OS=Homo sapiens OX=9606 GN=FUS PE=1 SV=1	Dimethylation(KR)	R8:Dimethylation(KR):42.57	PEAKS PTM
GGSGGSHGGGSGF	31.57	1019.41	13	0.2	510.71	2	24.9	222000	11	637042	F11:9452	No	FL1029_IPP114_PB_CB_vivax_7_even.raw	sp|P35527|K1C9_HUMAN Keratin type I cytoskeletal 9 OS=Homo sapiens OX=9606 GN=KRT9 PE=1 SV=3			PEAKS DB
GGSGGSHGGGSGFGGE	34.15	1262.49	16	1.5	632.254	2	25.72	558000	11	637333	F11:9764	No	FL1029_IPP114_PB_CB_vivax_7_even.raw	sp|P35527|K1C9_HUMAN Keratin type I cytoskeletal 9 OS=Homo sapiens OX=9606 GN=KRT9 PE=1 SV=3			PEAKS DB
GGSGGSHGGGSGFGGESGGS	30.16	1550.6	20	2.5	776.308	2	25.34	176000	11	637199	F11:9629	No	FL1029_IPP114_PB_CB_vivax_7_even.raw	sp|P35527|K1C9_HUMAN Keratin type I cytoskeletal 9 OS=Homo sapiens OX=9606 GN=KRT9 PE=1 SV=3			PEAKS DB
GGSGGSHGGGSGFGGESGGSY	28.44	1713.66	21	2.4	857.84	2	30.24		11	638949	F11:11499	No	FL1029_IPP114_PB_CB_vivax_7_even.raw	sp|P35527|K1C9_HUMAN Keratin type I cytoskeletal 9 OS=Homo sapiens OX=9606 GN=KRT9 PE=1 SV=3			PEAKS DB
GGSGGSYGGGGSGGGYGGGSGSR	41.75	1790.72	23	1.8	896.369	2	25.99	557000	11	637426	F11:9868	No	FL1029_IPP114_PB_CB_vivax_7_even.raw	sp|P35527|K1C9_HUMAN Keratin type I cytoskeletal 9 OS=Homo sapiens OX=9606 GN=KRT9 PE=1 SV=3			PEAKS DB
GGSKSISIS	19.01	834.445	9	-0.1	418.23	2	29.43		30	927720	F30:10659	No	FL1189_IPP114_PB_CB_vivax_6_odd.raw	sp|P04264|K2C1_HUMAN Keratin type II cytoskeletal 1 OS=Homo sapiens OX=9606 GN=KRT1 PE=1 SV=6			PEAKS DB
GGSSGGSIGGRGSSSGGVKSSGGSS	21.75	2011.92	25	-0.1	671.646	3	23.72	211000	32	1011358	F32:8571	No	FL1189b_IPP114_PB_CB_vivax_6_odd.raw	sp|P04264|K2C1_HUMAN Keratin type II cytoskeletal 1 OS=Homo sapiens OX=9606 GN=KRT1 PE=1 SV=6			PEAKS DB
GGSSSGGGYGGGSSSGGHK	35.21	1538.63	19	1.8	770.326	2	20.17	167000	9	725055	F9:7635	No	FL1029_IPP114_PB_CB_vivax_6_even.raw	sp|P13645|K1C10_HUMAN Keratin type I cytoskeletal 10 OS=Homo sapiens OX=9606 GN=KRT10 PE=1 SV=6			PEAKS DB
GGSSSGGHKSSSSGSVGESSSKGP	16	2092.93	24	1	698.65	3	21.24	697000	30	925037	F30:7698	No	FL1189_IPP114_PB_CB_vivax_6_odd.raw	sp|P13645|K1C10_HUMAN Keratin type I cytoskeletal 10 OS=Homo sapiens OX=9606 GN=KRT10 PE=1 SV=6			PEAKS DB
GGSSSVKGSSGEAFGSS	16.61	1486.65	17	-1.6	744.333	2	29.08	78200	32	1013158	F32:10522	No	FL1189b_IPP114_PB_CB_vivax_6_odd.raw	sp|P35908|K22E_HUMAN Keratin type II cytoskeletal 2 epidermal OS=Homo sapiens OX=9606 GN=KRT2 PE=1 SV=2			PEAKS DB
GGSYGSGGGGGGHGSY	20.12	1312.51	16	-1.5	657.26	2	25.96	86300	9	727069	F9:9864	No	FL1029_IPP114_PB_CB_vivax_6_even.raw	sp|P04264|K2C1_HUMAN Keratin type II cytoskeletal 1 OS=Homo sapiens OX=9606 GN=KRT1 PE=1 SV=6			PEAKS DB
GGYGGGSGKSSHS	36.72	1136.48	13	1.9	569.251	2	19.87	389000	11	635281	F11:7530	No	FL1029_IPP114_PB_CB_vivax_7_even.raw	sp|P35527|K1C9_HUMAN Keratin type I cytoskeletal 9 OS=Homo sapiens OX=9606 GN=KRT9 PE=1 SV=3			PEAKS DB
GGYGSGGGGSSSVKGSSGE	38.13	1572.67	19	-0.2	787.34	2	25.53	176000	32	1011982	F32:9229	No	FL1189b_IPP114_PB_CB_vivax_6_odd.raw	sp|P35908|K22E_HUMAN Keratin type II cytoskeletal 2 epidermal OS=Homo sapiens OX=9606 GN=KRT2 PE=1 SV=2			PEAKS DB
GGYGSGGGGSSSVKGSSGEA	29.17	1643.7	20	-0.7	822.858	2	26.22	70400	30	926658	F30:9505	No	FL1189_IPP114_PB_CB_vivax_6_odd.raw	sp|P35908|K22E_HUMAN Keratin type II cytoskeletal 2 epidermal OS=Homo sapiens OX=9606 GN=KRT2 PE=1 SV=2			PEAKS DB
GGYSDLAATSALTTIVKD	66.53	1781.9	18	1.3	891.961	2	49.68	5320000	14	892711	F14:18993	No	FL1029_IPP114_PB_CB_vivax_8_odd.raw	tr|A5K347|A5K347_PLAVS Exported protein 2 putative OS=Plasmodium vivax (strain Salvador I) OX=126793 GN=PVX_116915 PE=4 SV=1			PEAKS DB
GGYVAYSKAATVT	26.09	1286.65	13	-1.2	644.332	2	35.17	200000	32	1015186	F32:12730	No	FL1189b_IPP114_PB_CB_vivax_6_odd.raw	sp|P02786|TFR1_HUMAN Transferrin receptor protein 1 OS=Homo sapiens OX=9606 GN=TFRC PE=1 SV=2			PEAKS DB
GGYVAYSKAATVTG	28.07	1343.67	14	-0.1	672.843	2	35.37	180000	32	1015256	F32:12800	No	FL1189b_IPP114_PB_CB_vivax_6_odd.raw	sp|P02786|TFR1_HUMAN Transferrin receptor protein 1 OS=Homo sapiens OX=9606 GN=TFRC PE=1 SV=2			PEAKS DB
GGYVAYSKAATVTGK	25.33	1471.77	15	0.2	736.891	2	31.61	126000	32	1014000	F32:11434	No	FL1189b_IPP114_PB_CB_vivax_6_odd.raw	sp|P02786|TFR1_HUMAN Transferrin receptor protein 1 OS=Homo sapiens OX=9606 GN=TFRC PE=1 SV=2			PEAKS DB
GHGLGDALSEGVG	15.19	1167.55	13	-0.3	584.783	2	39.25	364000	11	642164	F11:14956	No	FL1029_IPP114_PB_CB_vivax_7_even.raw	sp|Q6E0U4|DMKN_HUMAN Dermokine OS=Homo sapiens OX=9606 GN=DMKN PE=1 SV=3			PEAKS DB
GHGPDGPK	18.85	763.361	8	-4.8	382.686	2	29.01	2050000	13	970928	F13:11032	No	FL1029_IPP114_PB_CB_vivax_8_even.raw	sp|P05997|CO5A2_HUMAN Collagen alpha-2(V) chain OS=Homo sapiens OX=9606 GN=COL5A2 PE=1 SV=3			PEAKS DB
GHK(+14.96)SSSSGSVGESSSKGP	21.42	1675.73	18	1.9	559.585	3	23.9	433000	9	726342	F9:9064	No	FL1029_IPP114_PB_CB_vivax_6_even.raw	sp|P13645|K1C10_HUMAN Keratin type I cytoskeletal 10 OS=Homo sapiens OX=9606 GN=KRT10 PE=1 SV=6	Alpha-amino adipic acid	K3:Alpha-amino adipic acid:39.02	PEAKS PTM
GHKSSSSGSVGESSSKGP	15.8	1660.77	18	-0.6	554.595	3	21.22	427000	32	1010583	F32:7672	No	FL1189b_IPP114_PB_CB_vivax_6_odd.raw	sp|P13645|K1C10_HUMAN Keratin type I cytoskeletal 10 OS=Homo sapiens OX=9606 GN=KRT10 PE=1 SV=6			PEAKS DB
GHYTEGAELI	18.1	1088.51	10	0.3	545.264	2	38.14	633000	11	641749	F11:14525	No	FL1029_IPP114_PB_CB_vivax_7_even.raw	tr|A5K7A8|A5K7A8_PLAVS Tubulin beta chain OS=Plasmodium vivax (strain Salvador I) OX=126793 GN=PVX_094635 PE=3 SV=1:sp|Q9H4B7|TBB1_HUMAN Tubulin beta-1 chain OS=Homo sapiens OX=9606 GN=TUBB1 PE=1 SV=1			PEAKS DB
GHYTEGAELVDSVLDVVR	23.21	1957.97	18	2.1	653.667	3	50.19		9	735682	F9:19182	No	FL1029_IPP114_PB_CB_vivax_6_even.raw	sp|P07437|TBB5_HUMAN Tubulin beta chain OS=Homo sapiens OX=9606 GN=TUBB PE=1 SV=2:sp|P68371|TBB4B_HUMAN Tubulin beta-4B chain OS=Homo sapiens OX=9606 GN=TUBB4B PE=1 SV=1:sp|Q13885|TBB2A_HUMAN Tubulin beta-2A chain OS=Homo sapiens OX=9606 GN=TUBB2A PE=1 SV=1:sp|Q9BVA1|TBB2B_HUMAN Tubulin beta-2B chain OS=Homo sapiens OX=9606 GN=TUBB2B PE=1 SV=1:sp|Q13509|TBB3_HUMAN Tubulin beta-3 chain OS=Homo sap…			PEAKS DB
GHYTEGAELVDSVLDVVRK	17.14	2086.07	19	-0.7	696.363	3	48.9		14	892449	F14:18704	No	FL1029_IPP114_PB_CB_vivax_8_odd.raw	sp|P07437|TBB5_HUMAN Tubulin beta chain OS=Homo sapiens OX=9606 GN=TUBB PE=1 SV=2:sp|P68371|TBB4B_HUMAN Tubulin beta-4B chain OS=Homo sapiens OX=9606 GN=TUBB4B PE=1 SV=1:sp|Q13885|TBB2A_HUMAN Tubulin beta-2A chain OS=Homo sapiens OX=9606 GN=TUBB2A PE=1 SV=1:sp|Q9BVA1|TBB2B_HUMAN Tubulin beta-2B chain OS=Homo sapiens OX=9606 GN=TUBB2B PE=1 SV=1:sp|Q13509|TBB3_HUMAN Tubulin beta-3 chain OS=Homo sap…			PEAKS DB
GIDSDASYPYK	15.47	1214.55	11	0	608.28	2	35.14	75100	32	1015172	F32:12720	No	FL1189b_IPP114_PB_CB_vivax_6_odd.raw	sp|P25774|CATS_HUMAN Cathepsin S OS=Homo sapiens OX=9606 GN=CTSS PE=1 SV=3			PEAKS DB
GIEGRYATAL	19.46	1049.55	10	0.3	525.783	2	38.81	215000	32	1016396	F32:14036	No	FL1189b_IPP114_PB_CB_vivax_6_odd.raw	sp|P48047|ATPO_HUMAN ATP synthase subunit O mitochondrial OS=Homo sapiens OX=9606 GN=ATP5PO PE=1 SV=1			PEAKS DB
GIEGRYATALY	15	1212.61	11	0.2	607.314	2	42.08	357000	31	997085	F31:15193	No	FL1189b_IPP114_PB_CB_vivax_6_even.raw	sp|P48047|ATPO_HUMAN ATP synthase subunit O mitochondrial OS=Homo sapiens OX=9606 GN=ATP5PO PE=1 SV=1			PEAKS DB
GIKKPHR	19.2	834.519	7	-1	418.266	2	20.08	141000	8	702551	F8:7644	No	FL1029_IPP114_PB_CB_vivax_4_odd.raw	tr|A5K1U7|A5K1U7_PLAVS Histone H3 OS=Plasmodium vivax (strain Salvador I) OX=126793 GN=PVX_113665 PE=3 SV=1:tr|A5K215|A5K215_PLAVS Histone H3 OS=Plasmodium vivax (strain Salvador I) OX=126793 GN=PVX_114020 PE=3 SV=1			PEAKS DB
GILHLLHKH	19.15	1066.64	9	0.7	534.328	2	48.22		9	735056	F9:18439	No	FL1029_IPP114_PB_CB_vivax_6_even.raw	tr|A5K9C7|A5K9C7_PLAVS Uncharacterized protein OS=Plasmodium vivax (strain Salvador I) OX=126793 GN=PVX_080090 PE=4 SV=1			PEAKS DB
GILKKKKELKLKQ	21.11	1553.04	13	0.4	389.267	4	27.72	329000	14	884913	F14:10581	No	FL1029_IPP114_PB_CB_vivax_8_odd.raw	tr|A5K3F2|A5K3F2_PLAVS 60S ribosomal protein L29 OS=Plasmodium vivax (strain Salvador I) OX=126793 GN=PVX_117440 PE=3 SV=1			PEAKS DB
GILKYPLTSEKAM(+15.99)KK	37.05	1721.97	15	0.8	574.999	3	29.85	587000	13	971246	F13:11396	No	FL1029_IPP114_PB_CB_vivax_8_even.raw	tr|A5K303|A5K303_PLAVS 60S ribosomal protein L23a putative OS=Plasmodium vivax (strain Salvador I) OX=126793 GN=PVX_116700 PE=3 SV=1	Oxidation (M)	M13:Oxidation (M):1000.00	PEAKS PTM
GILNPSQPGQSSSSSQT	18.51	1673.79	17	1.1	837.901	2	37.69	509000	10	664137	F10:14361	No	FL1029_IPP114_PB_CB_vivax_6_odd.raw	sp|Q15517|CDSN_HUMAN Corneodesmosin OS=Homo sapiens OX=9606 GN=CDSN PE=1 SV=3			PEAKS DB
GILNVSAVDKSTGKE	23.2	1516.81	15	0.5	506.611	3	36.33	345000	32	1015573	F32:13148	No	FL1189b_IPP114_PB_CB_vivax_6_odd.raw	sp|P11142|HSP7C_HUMAN Heat shock cognate 71 kDa protein OS=Homo sapiens OX=9606 GN=HSPA8 PE=1 SV=1			PEAKS DB
GINFVSPVRNQA	29.18	1300.69	12	-0.6	651.351	2	41.29	786000	31	996818	F31:14883	No	FL1189b_IPP114_PB_CB_vivax_6_even.raw	sp|P53634|CATC_HUMAN Dipeptidyl peptidase 1 OS=Homo sapiens OX=9606 GN=CTSC PE=1 SV=2			PEAKS DB
GINFVSPVRNQAS	28.23	1387.72	13	-0.4	694.867	2	41.03	530000	31	996733	F31:14785	No	FL1189b_IPP114_PB_CB_vivax_6_even.raw	sp|P53634|CATC_HUMAN Dipeptidyl peptidase 1 OS=Homo sapiens OX=9606 GN=CTSC PE=1 SV=2			PEAKS DB
GISRDGRHKL	33.29	1137.64	10	0.4	380.22	3	23.33	1200000	13	968932	F13:8874	No	FL1029_IPP114_PB_CB_vivax_8_even.raw	tr|A5K1E3|A5K1E3_PLAVS 40S ribosomal protein S8 OS=Plasmodium vivax (strain Salvador I) OX=126793 GN=PVX_086020 PE=3 SV=1			PEAKS DB
GISRDGRHKLRLTG	15.94	1564.89	14	-2.5	392.229	4	28.39		14	885155	F14:10806	No	FL1029_IPP114_PB_CB_vivax_8_odd.raw	tr|A5K1E3|A5K1E3_PLAVS 40S ribosomal protein S8 OS=Plasmodium vivax (strain Salvador I) OX=126793 GN=PVX_086020 PE=3 SV=1			PEAKS DB
GISRDGRHKLRLTGG	24.53	1621.91	15	-0.7	406.485	4	27.61	548000	13	970439	F13:10520	No	FL1029_IPP114_PB_CB_vivax_8_even.raw	tr|A5K1E3|A5K1E3_PLAVS 40S ribosomal protein S8 OS=Plasmodium vivax (strain Salvador I) OX=126793 GN=PVX_086020 PE=3 SV=1			PEAKS DB
GITKPAIR	17.88	854.534	8	-0.6	428.274	2	26.73	457000	9	727385	F9:10157	No	FL1029_IPP114_PB_CB_vivax_6_even.raw	sp|P62805|H4_HUMAN Histone H4 OS=Homo sapiens OX=9606 GN=HIST1H4A PE=1 SV=2:tr|A5K474|A5K474_PLAVS Histone H4 OS=Plasmodium vivax (strain Salvador I) OX=126793 GN=PVX_090930 PE=3 SV=1			PEAKS DB
GITLTPK	15.79	728.443	7	-2.5	365.228	2	22.97		4	815886	F4:8737	No	FL1029_IPP114_PB_CB_vivax_2_odd.raw	sp|A6NE01|F186A_HUMAN Protein FAM186A OS=Homo sapiens OX=9606 GN=FAM186A PE=2 SV=3			PEAKS DB
GK(+42.05)EKTHINIVVIGHVD	22	1800.03	16	0.4	451.014	4	35.34		14	887623	F14:13491	No	FL1029_IPP114_PB_CB_vivax_8_odd.raw	sp|P68104|EF1A1_HUMAN Elongation factor 1-alpha 1 OS=Homo sapiens OX=9606 GN=EEF1A1 PE=1 SV=1:sp|Q5VTE0|EF1A3_HUMAN Putative elongation factor 1-alpha-like 3 OS=Homo sapiens OX=9606 GN=EEF1A1P5 PE=5 SV=1:sp|Q05639|EF1A2_HUMAN Elongation factor 1-alpha 2 OS=Homo sapiens OX=9606 GN=EEF1A2 PE=1 SV=1	Trimethylation	K2:Trimethylation:0.00	PEAKS PTM
GK(+42.05)EKTHINIVVIGHVDSGKST	45.56	2260.25	21	4	754.428	3	32.06	2750000	13	972037	F13:12229	No	FL1029_IPP114_PB_CB_vivax_8_even.raw	sp|P68104|EF1A1_HUMAN Elongation factor 1-alpha 1 OS=Homo sapiens OX=9606 GN=EEF1A1 PE=1 SV=1:sp|Q5VTE0|EF1A3_HUMAN Putative elongation factor 1-alpha-like 3 OS=Homo sapiens OX=9606 GN=EEF1A1P5 PE=5 SV=1:sp|Q05639|EF1A2_HUMAN Elongation factor 1-alpha 2 OS=Homo sapiens OX=9606 GN=EEF1A2 PE=1 SV=1	Trimethylation	K2:Trimethylation:12.19	PEAKS PTM
GK(+42.05)EKTHINIVVIGHVDSGKSTT	42.66	2361.3	22	3.1	788.11	3	32.19	1640000	13	972084	F13:12268	No	FL1029_IPP114_PB_CB_vivax_8_even.raw	sp|P68104|EF1A1_HUMAN Elongation factor 1-alpha 1 OS=Homo sapiens OX=9606 GN=EEF1A1 PE=1 SV=1:sp|Q5VTE0|EF1A3_HUMAN Putative elongation factor 1-alpha-like 3 OS=Homo sapiens OX=9606 GN=EEF1A1P5 PE=5 SV=1:sp|Q05639|EF1A2_HUMAN Elongation factor 1-alpha 2 OS=Homo sapiens OX=9606 GN=EEF1A2 PE=1 SV=1	Trimethylation	K2:Trimethylation:0.00	PEAKS PTM
GK(+42.05)EKTHINIVVIGHVDSGKSTTT	61.45	2462.35	23	2.5	821.792	3	32.29	3040000	13	972120	F13:12319	No	FL1029_IPP114_PB_CB_vivax_8_even.raw	sp|P68104|EF1A1_HUMAN Elongation factor 1-alpha 1 OS=Homo sapiens OX=9606 GN=EEF1A1 PE=1 SV=1:sp|Q5VTE0|EF1A3_HUMAN Putative elongation factor 1-alpha-like 3 OS=Homo sapiens OX=9606 GN=EEF1A1P5 PE=5 SV=1:sp|Q05639|EF1A2_HUMAN Elongation factor 1-alpha 2 OS=Homo sapiens OX=9606 GN=EEF1A2 PE=1 SV=1	Trimethylation	K2:Trimethylation:0.00	PEAKS PTM
GK(+42.05)EKTHINLVVIGHVD	22.73	1800.03	16	0.4	451.014	4	35.34		14	887623	F14:13491	No	FL1029_IPP114_PB_CB_vivax_8_odd.raw	tr|A5K2H7|A5K2H7_PLAVS Elongation factor 1-alpha OS=Plasmodium vivax (strain Salvador I) OX=126793 GN=PVX_114830 PE=3 SV=1	Trimethylation	K2:Trimethylation:0.00	PEAKS PTM
GK(+42.05)EKTHINLVVIGHVDSGKST	46.07	2260.25	21	4	754.428	3	32.06	2750000	13	972037	F13:12229	No	FL1029_IPP114_PB_CB_vivax_8_even.raw	tr|A5K2H7|A5K2H7_PLAVS Elongation factor 1-alpha OS=Plasmodium vivax (strain Salvador I) OX=126793 GN=PVX_114830 PE=3 SV=1	Trimethylation	K2:Trimethylation:12.19	PEAKS PTM
GK(+42.05)EKTHINLVVIGHVDSGKSTT	43.35	2361.3	22	3.1	788.11	3	32.19	1640000	13	972084	F13:12268	No	FL1029_IPP114_PB_CB_vivax_8_even.raw	tr|A5K2H7|A5K2H7_PLAVS Elongation factor 1-alpha OS=Plasmodium vivax (strain Salvador I) OX=126793 GN=PVX_114830 PE=3 SV=1	Trimethylation	K2:Trimethylation:0.00	PEAKS PTM
GK(+42.05)EKTHINLVVIGHVDSGKSTTT	61.96	2462.35	23	2.5	821.792	3	32.29	3040000	13	972120	F13:12319	No	FL1029_IPP114_PB_CB_vivax_8_even.raw	tr|A5K2H7|A5K2H7_PLAVS Elongation factor 1-alpha OS=Plasmodium vivax (strain Salvador I) OX=126793 GN=PVX_114830 PE=3 SV=1	Trimethylation	K2:Trimethylation:0.00	PEAKS PTM
GKAGKGTGSF	36.23	908.472	10	0.5	455.243	2	23.16	1140000	14	883278	F14:8792	No	FL1029_IPP114_PB_CB_vivax_8_odd.raw	tr|A5KA70|A5KA70_PLAVS Ribosomal protein L37 OS=Plasmodium vivax (strain Salvador I) OX=126793 GN=PVX_087860 PE=3 SV=1			PEAKS DB
GKAGKGTGSFG	29.97	965.493	11	2.9	483.755	2	22.82	1280000	14	883157	F14:8638	No	FL1029_IPP114_PB_CB_vivax_8_odd.raw	tr|A5KA70|A5KA70_PLAVS Ribosomal protein L37 OS=Plasmodium vivax (strain Salvador I) OX=126793 GN=PVX_087860 PE=3 SV=1			PEAKS DB
GKAGKGTGSFGK	21	1093.59	12	2.9	547.803	2	20.97	247000	14	882534	F14:7961	No	FL1029_IPP114_PB_CB_vivax_8_odd.raw	tr|A5KA70|A5KA70_PLAVS Ribosomal protein L37 OS=Plasmodium vivax (strain Salvador I) OX=126793 GN=PVX_087860 PE=3 SV=1			PEAKS DB
GKAGKGTGSFGKR	24.37	1249.69	13	-0.6	417.57	3	20.63	769000	14	882415	F14:7842	No	FL1029_IPP114_PB_CB_vivax_8_odd.raw	tr|A5KA70|A5KA70_PLAVS Ribosomal protein L37 OS=Plasmodium vivax (strain Salvador I) OX=126793 GN=PVX_087860 PE=3 SV=1			PEAKS DB
GKAGKGTGSFGKRN	20.16	1363.73	14	1	682.874	2	20.49	435000	8	702737	F8:7798	No	FL1029_IPP114_PB_CB_vivax_4_odd.raw	tr|A5KA70|A5KA70_PLAVS Ribosomal protein L37 OS=Plasmodium vivax (strain Salvador I) OX=126793 GN=PVX_087860 PE=3 SV=1			PEAKS DB
GKAGKGTGSFGKRNG	36.06	1420.75	15	1.1	474.592	3	20.56	1860000	14	882378	F14:7811	No	FL1029_IPP114_PB_CB_vivax_8_odd.raw	tr|A5KA70|A5KA70_PLAVS Ribosomal protein L37 OS=Plasmodium vivax (strain Salvador I) OX=126793 GN=PVX_087860 PE=3 SV=1			PEAKS DB
GKAGKGTGSFGKRNGK	23.12	1548.85	16	1.4	517.291	3	20.25	1970000	14	882268	F14:7698	No	FL1029_IPP114_PB_CB_vivax_8_odd.raw	tr|A5KA70|A5KA70_PLAVS Ribosomal protein L37 OS=Plasmodium vivax (strain Salvador I) OX=126793 GN=PVX_087860 PE=3 SV=1			PEAKS DB
GKAGKGTGSFGKRNGKSHF	31.21	1920.01	19	1.4	481.01	4	23.97	666000	14	883574	F14:9116	No	FL1029_IPP114_PB_CB_vivax_8_odd.raw	tr|A5KA70|A5KA70_PLAVS Ribosomal protein L37 OS=Plasmodium vivax (strain Salvador I) OX=126793 GN=PVX_087860 PE=3 SV=1			PEAKS DB
GKDAVEDL	19.61	845.413	8	-0.9	423.713	2	32.46		10	662360	F10:12386	No	FL1029_IPP114_PB_CB_vivax_6_odd.raw	sp|P81605|DCD_HUMAN Dermcidin OS=Homo sapiens OX=9606 GN=DCD PE=1 SV=2			PEAKS DB
GKDGEAGAQGPPGPAGPA	25.22	1532.72	18	-0.6	767.368	2	30.62	235000	31	993315	F31:11058	No	FL1189b_IPP114_PB_CB_vivax_6_even.raw	sp|P02452|CO1A1_HUMAN Collagen alpha-1(I) chain OS=Homo sapiens OX=9606 GN=COL1A1 PE=1 SV=5			PEAKS DB
GKEK(+42.05)THINIVVIGHVDSGKST	43.84	2260.25	21	2.6	566.072	4	32.06	3440000	13	972036	F13:12221	No	FL1029_IPP114_PB_CB_vivax_8_even.raw	sp|P68104|EF1A1_HUMAN Elongation factor 1-alpha 1 OS=Homo sapiens OX=9606 GN=EEF1A1 PE=1 SV=1:sp|Q5VTE0|EF1A3_HUMAN Putative elongation factor 1-alpha-like 3 OS=Homo sapiens OX=9606 GN=EEF1A1P5 PE=5 SV=1:sp|Q05639|EF1A2_HUMAN Elongation factor 1-alpha 2 OS=Homo sapiens OX=9606 GN=EEF1A2 PE=1 SV=1	Trimethylation	K4:Trimethylation:8.22	PEAKS PTM
GKEK(+42.05)THINIVVIGHVDSGKSTT	49.46	2361.3	22	1.1	591.333	4	32.19	2590000	13	972083	F13:12269	No	FL1029_IPP114_PB_CB_vivax_8_even.raw	sp|P68104|EF1A1_HUMAN Elongation factor 1-alpha 1 OS=Homo sapiens OX=9606 GN=EEF1A1 PE=1 SV=1:sp|Q5VTE0|EF1A3_HUMAN Putative elongation factor 1-alpha-like 3 OS=Homo sapiens OX=9606 GN=EEF1A1P5 PE=5 SV=1:sp|Q05639|EF1A2_HUMAN Elongation factor 1-alpha 2 OS=Homo sapiens OX=9606 GN=EEF1A2 PE=1 SV=1	Trimethylation	K4:Trimethylation:8.22	PEAKS PTM
GKEK(+42.05)THINIVVIGHVDSGKSTTT	63.01	2462.35	23	2	616.596	4	32.29	5370000	13	972122	F13:12318	No	FL1029_IPP114_PB_CB_vivax_8_even.raw	sp|P68104|EF1A1_HUMAN Elongation factor 1-alpha 1 OS=Homo sapiens OX=9606 GN=EEF1A1 PE=1 SV=1:sp|Q5VTE0|EF1A3_HUMAN Putative elongation factor 1-alpha-like 3 OS=Homo sapiens OX=9606 GN=EEF1A1P5 PE=5 SV=1:sp|Q05639|EF1A2_HUMAN Elongation factor 1-alpha 2 OS=Homo sapiens OX=9606 GN=EEF1A2 PE=1 SV=1	Trimethylation	K4:Trimethylation:0.00	PEAKS PTM
GKEK(+42.05)THINLVVIGHVDSGKST	44.35	2260.25	21	2.6	566.072	4	32.06	3440000	13	972036	F13:12221	No	FL1029_IPP114_PB_CB_vivax_8_even.raw	tr|A5K2H7|A5K2H7_PLAVS Elongation factor 1-alpha OS=Plasmodium vivax (strain Salvador I) OX=126793 GN=PVX_114830 PE=3 SV=1	Trimethylation	K4:Trimethylation:8.22	PEAKS PTM
GKEK(+42.05)THINLVVIGHVDSGKSTT	49.97	2361.3	22	1.1	591.333	4	32.19	2590000	13	972083	F13:12269	No	FL1029_IPP114_PB_CB_vivax_8_even.raw	tr|A5K2H7|A5K2H7_PLAVS Elongation factor 1-alpha OS=Plasmodium vivax (strain Salvador I) OX=126793 GN=PVX_114830 PE=3 SV=1	Trimethylation	K4:Trimethylation:8.22	PEAKS PTM
GKEK(+42.05)THINLVVIGHVDSGKSTTT	63.51	2462.35	23	2	616.596	4	32.29	5370000	13	972122	F13:12318	No	FL1029_IPP114_PB_CB_vivax_8_even.raw	tr|A5K2H7|A5K2H7_PLAVS Elongation factor 1-alpha OS=Plasmodium vivax (strain Salvador I) OX=126793 GN=PVX_114830 PE=3 SV=1	Trimethylation	K4:Trimethylation:0.00	PEAKS PTM
GKGKNKEKL	25.07	1000.6	9	-0.5	334.541	3	20.19	1920000	14	882237	F14:7671	No	FL1029_IPP114_PB_CB_vivax_8_odd.raw	tr|A5K124|A5K124_PLAVS 40S ribosomal protein S25 putative OS=Plasmodium vivax (strain Salvador I) OX=126793 GN=PVX_085420 PE=4 SV=1			PEAKS DB
GKGKNKEKLNHA	22.19	1322.74	12	-0.4	441.921	3	19.84	863000	3	859697	F3:7495	No	FL1029_IPP114_PB_CB_vivax_2_even.raw	tr|A5K124|A5K124_PLAVS 40S ribosomal protein S25 putative OS=Plasmodium vivax (strain Salvador I) OX=126793 GN=PVX_085420 PE=4 SV=1			PEAKS DB
GKGKNKEKLNHAV	20.27	1421.81	13	0	474.944	3	21.81	8130000	14	882865	F14:8254	No	FL1029_IPP114_PB_CB_vivax_8_odd.raw	tr|A5K124|A5K124_PLAVS 40S ribosomal protein S25 putative OS=Plasmodium vivax (strain Salvador I) OX=126793 GN=PVX_085420 PE=4 SV=1			PEAKS DB
GKGKNKEKLNHAVF	15.93	1568.88	14	1.7	523.968	3	25.74	26800000	14	884210	F14:10332	No	FL1029_IPP114_PB_CB_vivax_8_odd.raw	tr|A5K124|A5K124_PLAVS 40S ribosomal protein S25 putative OS=Plasmodium vivax (strain Salvador I) OX=126793 GN=PVX_085420 PE=4 SV=1			PEAKS DB
GKGKNKEKLNHAVFI	19.63	1681.96	15	-1.8	421.497	4	30.11		14	885760	F14:11472	No	FL1029_IPP114_PB_CB_vivax_8_odd.raw	tr|A5K124|A5K124_PLAVS 40S ribosomal protein S25 putative OS=Plasmodium vivax (strain Salvador I) OX=126793 GN=PVX_085420 PE=4 SV=1			PEAKS DB
GKKKDKKNLKGAKAEEGKKDGVK	49.28	2483.45	23	0.2	621.871	4	20.46	2520000	13	967880	F13:7758	No	FL1029_IPP114_PB_CB_vivax_8_even.raw	tr|A5K858|A5K858_PLAVS 40S ribosomal protein S6 putative OS=Plasmodium vivax (strain Salvador I) OX=126793 GN=PVX_083000 PE=4 SV=1			PEAKS DB
GKKKGADKEKK	25.9	1215.73	11	-0.2	406.25	3	19.31	754000	13	967482	F13:7320	No	FL1029_IPP114_PB_CB_vivax_8_even.raw	tr|A5K303|A5K303_PLAVS 60S ribosomal protein L23a putative OS=Plasmodium vivax (strain Salvador I) OX=126793 GN=PVX_116700 PE=3 SV=1			PEAKS DB
GKKKGADKEKKQLY	21.49	1619.94	14	2.1	540.987	3	21.85	723000	14	882881	F14:8343	No	FL1029_IPP114_PB_CB_vivax_8_odd.raw	tr|A5K303|A5K303_PLAVS 60S ribosomal protein L23a putative OS=Plasmodium vivax (strain Salvador I) OX=126793 GN=PVX_116700 PE=3 SV=1			PEAKS DB
GKKNVKGKEANKKVGNKKIDKK	21.52	2438.48	22	2.2	813.836	3	20.12	920000	13	967777	F13:7643	No	FL1029_IPP114_PB_CB_vivax_8_even.raw	tr|A5KE19|A5KE19_PLAVS Merozoite capping protein 1 putative OS=Plasmodium vivax (strain Salvador I) OX=126793 GN=PVX_111355 PE=4 SV=1			PEAKS DB
GKLLKPGKVVI	23.76	1150.78	11	-0.1	384.601	3	32.46	481000	13	972175	F13:12399	No	FL1029_IPP114_PB_CB_vivax_8_even.raw	tr|A5K3E8|A5K3E8_PLAVS 60S ribosomal protein L27 putative OS=Plasmodium vivax (strain Salvador I) OX=126793 GN=PVX_117420 PE=4 SV=1			PEAKS DB
GKNKEKLNHAVF	20.62	1383.76	12	-0.7	462.261	3	26.48	1130000	14	884462	F14:10044	No	FL1029_IPP114_PB_CB_vivax_8_odd.raw	tr|A5K124|A5K124_PLAVS 40S ribosomal protein S25 putative OS=Plasmodium vivax (strain Salvador I) OX=126793 GN=PVX_085420 PE=4 SV=1			PEAKS DB
GKNQQVKKAAAEESKKKKKITT	16.05	2442.43	22	4.6	611.617	4	23.57	493000	14	883430	F14:8963	No	FL1029_IPP114_PB_CB_vivax_8_odd.raw	tr|A5K303|A5K303_PLAVS 60S ribosomal protein L23a putative OS=Plasmodium vivax (strain Salvador I) OX=126793 GN=PVX_116700 PE=3 SV=1			PEAKS DB
GKPGAPGPR	16.36	835.466	9	0	418.74	2	28.63	279000	31	992661	F31:10364	No	FL1189b_IPP114_PB_CB_vivax_6_even.raw	sp|P25940|CO5A3_HUMAN Collagen alpha-3(V) chain OS=Homo sapiens OX=9606 GN=COL5A3 PE=1 SV=3			PEAKS DB
GKVHGSI	27.59	696.392	7	-0.7	349.203	2	23.23	345000	14	883303	F14:8831	No	FL1029_IPP114_PB_CB_vivax_8_odd.raw	sp|Q9BZF3|OSBL6_HUMAN Oxysterol-binding protein-related protein 6 OS=Homo sapiens OX=9606 GN=OSBPL6 PE=1 SV=1			PEAKS DB
GKVHGSL	27.59	696.392	7	-0.7	349.203	2	23.23	345000	14	883303	F14:8831	No	FL1029_IPP114_PB_CB_vivax_8_odd.raw	tr|A5KBT5|A5KBT5_PLAVS 40S ribosomal protein S30 OS=Plasmodium vivax (strain Salvador I) OX=126793 GN=PVX_002590 PE=3 SV=1			PEAKS DB
GKVHGSLA	25.41	767.429	8	-1.2	384.721	2	23.03	308000	14	883236	F14:8740	No	FL1029_IPP114_PB_CB_vivax_8_odd.raw	tr|A5KBT5|A5KBT5_PLAVS 40S ribosomal protein S30 OS=Plasmodium vivax (strain Salvador I) OX=126793 GN=PVX_002590 PE=3 SV=1			PEAKS DB
GKVHGSLAR	18.07	923.53	9	1.8	308.851	3	21.71	201000	14	882767	F14:8255	No	FL1029_IPP114_PB_CB_vivax_8_odd.raw	tr|A5KBT5|A5KBT5_PLAVS 40S ribosomal protein S30 OS=Plasmodium vivax (strain Salvador I) OX=126793 GN=PVX_002590 PE=3 SV=1			PEAKS DB
GKVHGSLARA	20.59	994.567	10	3.5	498.293	2	22.83	467000	14	883162	F14:8663	No	FL1029_IPP114_PB_CB_vivax_8_odd.raw	tr|A5KBT5|A5KBT5_PLAVS 40S ribosomal protein S30 OS=Plasmodium vivax (strain Salvador I) OX=126793 GN=PVX_002590 PE=3 SV=1			PEAKS DB
GKVHGSLARAG	18.76	1051.59	11	0.7	526.802	2	22.15		14	882955	F14:8404	No	FL1029_IPP114_PB_CB_vivax_8_odd.raw	tr|A5KBT5|A5KBT5_PLAVS 40S ribosomal protein S30 OS=Plasmodium vivax (strain Salvador I) OX=126793 GN=PVX_002590 PE=3 SV=1			PEAKS DB
GKVHGSLARAGK	34.95	1179.68	12	-0.3	394.235	3	21.63	596000	13	968302	F13:8209	No	FL1029_IPP114_PB_CB_vivax_8_even.raw	tr|A5KBT5|A5KBT5_PLAVS 40S ribosomal protein S30 OS=Plasmodium vivax (strain Salvador I) OX=126793 GN=PVX_002590 PE=3 SV=1			PEAKS DB
GKVHGSLARAGKVK	19.38	1406.85	14	1.4	469.957	3	22.84	1440000	13	968734	F13:8642	No	FL1029_IPP114_PB_CB_vivax_8_even.raw	tr|A5KBT5|A5KBT5_PLAVS 40S ribosomal protein S30 OS=Plasmodium vivax (strain Salvador I) OX=126793 GN=PVX_002590 PE=3 SV=1			PEAKS DB
GKVHGSLARAGKVKNQ	21.85	1648.95	16	0.9	413.245	4	23.26	377000	14	883315	F14:8835	No	FL1029_IPP114_PB_CB_vivax_8_odd.raw	tr|A5KBT5|A5KBT5_PLAVS 40S ribosomal protein S30 OS=Plasmodium vivax (strain Salvador I) OX=126793 GN=PVX_002590 PE=3 SV=1			PEAKS DB
GKVHGSLARAGKVKNQTPKVPK	15.42	2299.36	22	-2.4	767.459	3	27.94		14	884994	F14:10632	No	FL1029_IPP114_PB_CB_vivax_8_odd.raw	tr|A5KBT5|A5KBT5_PLAVS 40S ribosomal protein S30 OS=Plasmodium vivax (strain Salvador I) OX=126793 GN=PVX_002590 PE=3 SV=1			PEAKS DB
GKVHGSLARAGKVKNQTPKVPKVS	36.46	2485.46	24	1.2	622.373	4	29.57		14	885570	F14:11263	No	FL1029_IPP114_PB_CB_vivax_8_odd.raw	tr|A5KBT5|A5KBT5_PLAVS 40S ribosomal protein S30 OS=Plasmodium vivax (strain Salvador I) OX=126793 GN=PVX_002590 PE=3 SV=1			PEAKS DB
GLDPKFFK	21.8	950.523	8	-0.9	476.268	2	36.42	225000	14	888000	F14:13896	No	FL1029_IPP114_PB_CB_vivax_8_odd.raw	tr|A5K3F2|A5K3F2_PLAVS 60S ribosomal protein L29 OS=Plasmodium vivax (strain Salvador I) OX=126793 GN=PVX_117440 PE=3 SV=1			PEAKS DB
GLDVEDVKF	20.28	1020.51	9	-1.8	511.263	2	46.24	99100	12	689454	F12:17690	No	FL1029_IPP114_PB_CB_vivax_7_odd.raw	sp|P17844|DDX5_HUMAN Probable ATP-dependent RNA helicase DDX5 OS=Homo sapiens OX=9606 GN=DDX5 PE=1 SV=1:sp|Q92841|DDX17_HUMAN Probable ATP-dependent RNA helicase DDX17 OS=Homo sapiens OX=9606 GN=DDX17 PE=1 SV=2			PEAKS DB
GLGESSGFGHHES	26.62	1299.55	13	0.6	650.782	2	27.94	153000	11	638119	F11:10618	No	FL1029_IPP114_PB_CB_vivax_7_even.raw	sp|Q86YZ3|HORN_HUMAN Hornerin OS=Homo sapiens OX=9606 GN=HRNR PE=1 SV=2			PEAKS DB
GLGLLLLLQLLPP	15.62	1358.89	13	4.5	340.731	4	24.21		12	681719	F12:9213	No	FL1029_IPP114_PB_CB_vivax_7_odd.raw	sp|Q99523|SORT_HUMAN Sortilin OS=Homo sapiens OX=9606 GN=SORT1 PE=1 SV=3			PEAKS DB
GLGSGGSIR	27.97	802.43	9	-0.3	402.222	2	27.73	3480000	11	638047	F11:10528	No	FL1029_IPP114_PB_CB_vivax_7_even.raw	sp|P35527|K1C9_HUMAN Keratin type I cytoskeletal 9 OS=Homo sapiens OX=9606 GN=KRT9 PE=1 SV=3			PEAKS DB
GLGSGGSIRS	26.91	889.462	10	-0.6	445.738	2	27.79	434000	11	638065	F11:10559	No	FL1029_IPP114_PB_CB_vivax_7_even.raw	sp|P35527|K1C9_HUMAN Keratin type I cytoskeletal 9 OS=Homo sapiens OX=9606 GN=KRT9 PE=1 SV=3			PEAKS DB
GLGSGGSIRSS	34.98	976.494	11	1.5	489.255	2	27.63	1660000	11	638014	F11:10499	No	FL1029_IPP114_PB_CB_vivax_7_even.raw	sp|P35527|K1C9_HUMAN Keratin type I cytoskeletal 9 OS=Homo sapiens OX=9606 GN=KRT9 PE=1 SV=3			PEAKS DB
GLGSGGSIRSSY	19.85	1139.56	12	2.2	570.787	2	32.73	210000	11	639837	F11:12463	No	FL1029_IPP114_PB_CB_vivax_7_even.raw	sp|P35527|K1C9_HUMAN Keratin type I cytoskeletal 9 OS=Homo sapiens OX=9606 GN=KRT9 PE=1 SV=3			PEAKS DB
GLGVGFGSGGGSSSSVK	17.16	1438.71	17	2.2	720.361	2	36.08	52200	9	730801	F9:13772	No	FL1029_IPP114_PB_CB_vivax_6_even.raw	sp|P13647|K2C5_HUMAN Keratin type II cytoskeletal 5 OS=Homo sapiens OX=9606 GN=KRT5 PE=1 SV=3			PEAKS DB
GLHLTKH	26.86	804.461	7	-0.7	403.237	2	21.44	3090000	14	882681	F14:8127	No	FL1029_IPP114_PB_CB_vivax_8_odd.raw	sp|Q9NR09|BIRC6_HUMAN Baculoviral IAP repeat-containing protein 6 OS=Homo sapiens OX=9606 GN=BIRC6 PE=1 SV=2			PEAKS DB
GLKNGVPAV	16.83	853.502	9	0.3	427.759	2	33.47	370000	14	886953	F14:12759	No	FL1029_IPP114_PB_CB_vivax_8_odd.raw	sp|P53621|COPA_HUMAN Coatomer subunit alpha OS=Homo sapiens OX=9606 GN=COPA PE=1 SV=2			PEAKS DB
GLLEGVRGV	18.13	898.524	9	0	450.269	2	41.28	643000	13	975313	F13:15802	No	FL1029_IPP114_PB_CB_vivax_8_even.raw	sp|Q8NG06|TRI58_HUMAN E3 ubiquitin-protein ligase TRIM58 OS=Homo sapiens OX=9606 GN=TRIM58 PE=2 SV=2			PEAKS DB
GLLRGAKKTK	26.37	1070.69	10	0.3	357.905	3	23.13	436000	14	883271	F14:8771	No	FL1029_IPP114_PB_CB_vivax_8_odd.raw	tr|A5K9J0|A5K9J0_PLAVS 60S ribosomal protein L8 putative OS=Plasmodium vivax (strain Salvador I) OX=126793 GN=PVX_080405 PE=4 SV=1			PEAKS DB
GLNQKQPTKGSNIQ	18.97	1511.81	14	0.3	504.943	3	25.44	651000	14	884100	F14:9675	No	FL1029_IPP114_PB_CB_vivax_8_odd.raw	tr|A5KBH5|A5KBH5_PLAVS Early transcribed membrane protein (ETRAMP) OS=Plasmodium vivax (strain Salvador I) OX=126793 GN=PVX_003565 PE=4 SV=1			PEAKS DB
GLP(+15.99)GADGR	17.36	757.372	8	-0.8	379.693	2	26.31	138000	29	906322	F29:9487	No	FL1189_IPP114_PB_CB_vivax_6_even.raw	sp|P08123|CO1A2_HUMAN Collagen alpha-2(I) chain OS=Homo sapiens OX=9606 GN=COL1A2 PE=1 SV=7	Oxidation or Hydroxylation	P3:Oxidation or Hydroxylation:22.45	PEAKS PTM
GLRLKEKD	29.39	957.561	8	1.4	320.195	3	24.39	660000	13	969289	F13:9281	No	FL1029_IPP114_PB_CB_vivax_8_even.raw	tr|A5KDT8|A5KDT8_PLAVS Uncharacterized protein OS=Plasmodium vivax (strain Salvador I) OX=126793 GN=PVX_110915 PE=4 SV=1			PEAKS DB
GLTGSPGSP(+15.99)GPDGK	19.03	1241.59	14	-0.2	621.802	2	28.02	301000	29	906910	F29:10133	No	FL1189_IPP114_PB_CB_vivax_6_even.raw	sp|P02452|CO1A1_HUMAN Collagen alpha-1(I) chain OS=Homo sapiens OX=9606 GN=COL1A1 PE=1 SV=5	Oxidation or Hydroxylation	P9:Oxidation or Hydroxylation:0.00	PEAKS PTM
GLTGSPGSPGPD(+15.99)GK	18.62	1241.59	14	-0.3	621.802	2	28	274000	31	992456	F31:10113	No	FL1189b_IPP114_PB_CB_vivax_6_even.raw	sp|P02452|CO1A1_HUMAN Collagen alpha-1(I) chain OS=Homo sapiens OX=9606 GN=COL1A1 PE=1 SV=5	Oxidation or Hydroxylation	D12:Oxidation or Hydroxylation:0.00	PEAKS PTM
GLTGSPGSPGPDGK(+15.99)	16.9	1241.59	14	-0.4	621.801	2	27.99	196000	32	1012808	F32:10125	No	FL1189b_IPP114_PB_CB_vivax_6_odd.raw	sp|P02452|CO1A1_HUMAN Collagen alpha-1(I) chain OS=Homo sapiens OX=9606 GN=COL1A1 PE=1 SV=5	Oxidation or Hydroxylation	K14:Oxidation or Hydroxylation:0.00	PEAKS PTM
GLTSPIFCSTK	17.96	1152.58	11	-4.4	577.297	2	27.67		5	772575	F5:10512	No	FL1029_IPP114_PB_CB_vivax_3_even.raw	sp|Q9ULL5|PRR12_HUMAN Proline-rich protein 12 OS=Homo sapiens OX=9606 GN=PRR12 PE=1 SV=3			PEAKS DB
GLTVEDIRNRKA	20.32	1370.76	12	0.5	457.928	3	30.43	534000	14	885883	F14:11602	No	FL1029_IPP114_PB_CB_vivax_8_odd.raw	tr|A5JZ82|A5JZ82_PLAVS 60S ribosomal protein L24 putative OS=Plasmodium vivax (strain Salvador I) OX=126793 GN=PVX_122285 PE=4 SV=1			PEAKS DB
GM(+15.99)GQKDSYVGD	21.66	1171.48	11	2	586.749	2	26.59	230000	11	637647	F11:10107	No	FL1029_IPP114_PB_CB_vivax_7_even.raw	sp|P63261|ACTG_HUMAN Actin cytoplasmic 2 OS=Homo sapiens OX=9606 GN=ACTG1 PE=1 SV=1:sp|P60709|ACTB_HUMAN Actin cytoplasmic 1 OS=Homo sapiens OX=9606 GN=ACTB PE=1 SV=1	Oxidation (M)	M2:Oxidation (M):1000.00	PEAKS PTM
GMDPEGQQQMWQAIRATFRNTERG	16.96	2806.3	24	2.4	936.444	3	50.26	57200	5	780684	F5:19292	No	FL1029_IPP114_PB_CB_vivax_3_even.raw	sp|O94911|ABCA8_HUMAN ATP-binding cassette sub-family A member 8 OS=Homo sapiens OX=9606 GN=ABCA8 PE=1 SV=3			PEAKS DB
GNAKGKKPAKKVI	26.9	1337.85	13	-0.7	446.957	3	21.24	384000	14	882608	F14:8061	No	FL1029_IPP114_PB_CB_vivax_8_odd.raw	tr|A5K584|A5K584_PLAVS 60S ribosomal protein L33-B putative OS=Plasmodium vivax (strain Salvador I) OX=126793 GN=PVX_092735 PE=3 SV=1			PEAKS DB
GNDKLGKKKGADKEKKQLY	28.79	2147.21	19	0.8	537.809	4	24.03	804000	14	883600	F14:9128	No	FL1029_IPP114_PB_CB_vivax_8_odd.raw	tr|A5K303|A5K303_PLAVS 60S ribosomal protein L23a putative OS=Plasmodium vivax (strain Salvador I) OX=126793 GN=PVX_116700 PE=3 SV=1			PEAKS DB
GNGKKFNKKPF	41.31	1263.71	11	-0.1	422.243	3	24.57	1100000	14	883793	F14:9336	No	FL1029_IPP114_PB_CB_vivax_8_odd.raw	tr|A5K7V6|A5K7V6_PLAVS RRM domain-containing protein OS=Plasmodium vivax (strain Salvador I) OX=126793 GN=PVX_082480 PE=4 SV=1			PEAKS DB
GNK(+210.20)QKNVPLPVIAELPPK	21.88	2151.34	18	-4.4	1076.67	2	39.74	108000	12	687144	F12:15133	No	FL1029_IPP114_PB_CB_vivax_7_odd.raw	sp|P0DOX6|IGM_HUMAN Immunoglobulin mu heavy chain OS=Homo sapiens OX=9606 PE=1 SV=2	Myristoylation	K3:Myristoylation:0.00	PEAKS PTM
GNNGGSNDDGNGKKFNKKPF	36.6	2093.99	20	3.6	699.006	3	25.71	408000	14	884191	F14:9776	No	FL1029_IPP114_PB_CB_vivax_8_odd.raw	tr|A5K7V6|A5K7V6_PLAVS RRM domain-containing protein OS=Plasmodium vivax (strain Salvador I) OX=126793 GN=PVX_082480 PE=4 SV=1			PEAKS DB
GNPKVKAHGKKV	26.66	1261.76	12	1.2	631.889	2	20.32	727000	14	882294	F14:7725	No	FL1029_IPP114_PB_CB_vivax_8_odd.raw	sp|P68871|HBB_HUMAN Hemoglobin subunit beta OS=Homo sapiens OX=9606 GN=HBB PE=1 SV=2:sp|P02042|HBD_HUMAN Hemoglobin subunit delta OS=Homo sapiens OX=9606 GN=HBD PE=1 SV=2:sp|P69892|HBG2_HUMAN Hemoglobin subunit gamma-2 OS=Homo sapiens OX=9606 GN=HBG2 PE=1 SV=2:sp|P69891|HBG1_HUMAN Hemoglobin subunit gamma-1 OS=Homo sapiens OX=9606 GN=HBG1 PE=1 SV=2:sp|P02100|HBE_HUMAN Hemoglobin subunit epsilon O…			PEAKS DB
GNPKVKAHGKKVL	46.22	1374.85	13	2.8	459.291	3	22.54	803000	13	968634	F13:8689	No	FL1029_IPP114_PB_CB_vivax_8_even.raw	sp|P68871|HBB_HUMAN Hemoglobin subunit beta OS=Homo sapiens OX=9606 GN=HBB PE=1 SV=2:sp|P02042|HBD_HUMAN Hemoglobin subunit delta OS=Homo sapiens OX=9606 GN=HBD PE=1 SV=2:sp|P69892|HBG2_HUMAN Hemoglobin subunit gamma-2 OS=Homo sapiens OX=9606 GN=HBG2 PE=1 SV=2:sp|P69891|HBG1_HUMAN Hemoglobin subunit gamma-1 OS=Homo sapiens OX=9606 GN=HBG1 PE=1 SV=2:sp|P02100|HBE_HUMAN Hemoglobin subunit epsilon O…			PEAKS DB
GNQVFSYTANKEIRTDD	15.98	1956.92	17	0.1	653.313	3	36.6	330000	31	995297	F31:13216	No	FL1189b_IPP114_PB_CB_vivax_6_even.raw	sp|Q10472|GALT1_HUMAN Polypeptide N-acetylgalactosaminyltransferase 1 OS=Homo sapiens OX=9606 GN=GALNT1 PE=1 SV=1			PEAKS DB
GNQVFSYTANKEIRTDDL	27.96	2070	18	-0.1	691.008	3	41.61	613000	32	1017307	F32:15048	No	FL1189b_IPP114_PB_CB_vivax_6_odd.raw	sp|Q10472|GALT1_HUMAN Polypeptide N-acetylgalactosaminyltransferase 1 OS=Homo sapiens OX=9606 GN=GALNT1 PE=1 SV=1			PEAKS DB
GP(+13.98)KGENGVVGPTGPV	21.26	1377.69	15	0.2	689.852	2	33.43	238000	30	929042	F30:12099	No	FL1189_IPP114_PB_CB_vivax_6_odd.raw	sp|P08123|CO1A2_HUMAN Collagen alpha-2(I) chain OS=Homo sapiens OX=9606 GN=COL1A2 PE=1 SV=7	Proline oxidation to pyroglutamic acid	P2:Proline oxidation to pyroglutamic acid:37.82	PEAKS PTM
GPAGAP(+15.99)GTPGPQ	19.66	1021.48	12	1	511.749	2	29.32	131000	31	992895	F31:10605	No	FL1189b_IPP114_PB_CB_vivax_6_even.raw	sp|P02452|CO1A1_HUMAN Collagen alpha-1(I) chain OS=Homo sapiens OX=9606 GN=COL1A1 PE=1 SV=5	Oxidation or Hydroxylation	P6:Oxidation or Hydroxylation:12.33	PEAKS PTM
GPAGPAGPR	17.28	778.409	9	-0.7	390.211	2	24.47	618000	32	1011606	F32:8824	No	FL1189b_IPP114_PB_CB_vivax_6_odd.raw	sp|P08123|CO1A2_HUMAN Collagen alpha-2(I) chain OS=Homo sapiens OX=9606 GN=COL1A2 PE=1 SV=7			PEAKS DB
GPAGPAGPRG	18.66	835.43	10	-0.5	418.722	2	24.07	5660000	31	991122	F31:8743	No	FL1189b_IPP114_PB_CB_vivax_6_even.raw	sp|P08123|CO1A2_HUMAN Collagen alpha-2(I) chain OS=Homo sapiens OX=9606 GN=COL1A2 PE=1 SV=7			PEAKS DB
GPAGPAGSPGEDG	17.07	1067.45	13	4	534.735	2	24.51		29	905729	F29:8865	No	FL1189_IPP114_PB_CB_vivax_6_even.raw	sp|P12107|COBA1_HUMAN Collagen alpha-1(XI) chain OS=Homo sapiens OX=9606 GN=COL11A1 PE=1 SV=4			PEAKS DB
GPAGPQ(+.98)GPR	20.55	836.414	9	0.6	419.214	2	24.4	103000	32	1011587	F32:9000	No	FL1189b_IPP114_PB_CB_vivax_6_odd.raw	sp|P02452|CO1A1_HUMAN Collagen alpha-1(I) chain OS=Homo sapiens OX=9606 GN=COL1A1 PE=1 SV=5	Deamidation (NQ)	Q6:Deamidation (NQ):1000.00	PEAKS PTM
GPAGPQGPR	24.43	835.43	9	-0.5	418.722	2	24.14	3400000	32	1011496	F32:8691	No	FL1189b_IPP114_PB_CB_vivax_6_odd.raw	sp|P02452|CO1A1_HUMAN Collagen alpha-1(I) chain OS=Homo sapiens OX=9606 GN=COL1A1 PE=1 SV=5			PEAKS DB
GPAGPSGPAGKD	28.46	1009.48	12	-1.3	505.748	2	24.63	230000	32	1011660	F32:8885	No	FL1189b_IPP114_PB_CB_vivax_6_odd.raw	sp|P08123|CO1A2_HUMAN Collagen alpha-2(I) chain OS=Homo sapiens OX=9606 GN=COL1A2 PE=1 SV=7			PEAKS DB
GPAGPSGPAGKDG	32.19	1066.5	13	0.8	534.26	2	24.53	263000	32	1011627	F32:8848	No	FL1189b_IPP114_PB_CB_vivax_6_odd.raw	sp|P08123|CO1A2_HUMAN Collagen alpha-2(I) chain OS=Homo sapiens OX=9606 GN=COL1A2 PE=1 SV=7			PEAKS DB
GPAGPSGPAGKDGR	20.53	1222.61	14	0.1	408.542	3	23.02	126000	31	990770	F31:8301	No	FL1189b_IPP114_PB_CB_vivax_6_even.raw	sp|P08123|CO1A2_HUMAN Collagen alpha-2(I) chain OS=Homo sapiens OX=9606 GN=COL1A2 PE=1 SV=7			PEAKS DB
GPAGQQLPQ	18.11	894.456	9	-0.7	448.235	2	23.88	90700	32	1011405	F32:8622	No	FL1189b_IPP114_PB_CB_vivax_6_odd.raw	sp|Q92896|GSLG1_HUMAN Golgi apparatus protein 1 OS=Homo sapiens OX=9606 GN=GLG1 PE=1 SV=2			PEAKS DB
GPFGQIFRPDN	31.61	1246.61	11	3.1	624.314	2	46.48	239000	12	689535	F12:17734	No	FL1029_IPP114_PB_CB_vivax_7_odd.raw	sp|P07437|TBB5_HUMAN Tubulin beta chain OS=Homo sapiens OX=9606 GN=TUBB PE=1 SV=2:sp|P68371|TBB4B_HUMAN Tubulin beta-4B chain OS=Homo sapiens OX=9606 GN=TUBB4B PE=1 SV=1:sp|Q13885|TBB2A_HUMAN Tubulin beta-2A chain OS=Homo sapiens OX=9606 GN=TUBB2A PE=1 SV=1:sp|Q9BVA1|TBB2B_HUMAN Tubulin beta-2B chain OS=Homo sapiens OX=9606 GN=TUBB2B PE=1 SV=1:sp|P04350|TBB4A_HUMAN Tubulin beta-4A chain OS=Homo s…			PEAKS DB
GPFGQLFRPDN	31.61	1246.61	11	3.1	624.314	2	46.48	239000	12	689535	F12:17734	No	FL1029_IPP114_PB_CB_vivax_7_odd.raw	tr|A5K7A8|A5K7A8_PLAVS Tubulin beta chain OS=Plasmodium vivax (strain Salvador I) OX=126793 GN=PVX_094635 PE=3 SV=1:sp|Q9BUF5|TBB6_HUMAN Tubulin beta-6 chain OS=Homo sapiens OX=9606 GN=TUBB6 PE=1 SV=1			PEAKS DB
GPHQQSHKESAR(+.98)GQSGE	31.67	1819.82	17	0.1	910.917	2	19.42	381000	31	989757	F31:7006	No	FL1189b_IPP114_PB_CB_vivax_6_even.raw	sp|P20930|FILA_HUMAN Filaggrin OS=Homo sapiens OX=9606 GN=FLG PE=1 SV=3	Deamidation (R)	R12:Deamidation (R):1000.00	PEAKS PTM
GPK(+14.96)GENGVVGPTGPV	22.34	1378.67	15	-0.5	690.343	2	35.36	272000	31	994888	F31:12767	No	FL1189b_IPP114_PB_CB_vivax_6_even.raw	sp|P08123|CO1A2_HUMAN Collagen alpha-2(I) chain OS=Homo sapiens OX=9606 GN=COL1A2 PE=1 SV=7	Alpha-amino adipic acid	K3:Alpha-amino adipic acid:1000.00	PEAKS PTM
GPKRATKIR	22.06	1025.65	9	0.7	342.889	3	20.46	691000	14	882333	F14:7778	No	FL1029_IPP114_PB_CB_vivax_8_odd.raw	tr|A5K858|A5K858_PLAVS 40S ribosomal protein S6 putative OS=Plasmodium vivax (strain Salvador I) OX=126793 GN=PVX_083000 PE=4 SV=1			PEAKS DB
GPKRATKIRK	37.03	1153.74	10	-0.1	385.587	3	20.12	2290000	14	882210	F14:7639	No	FL1029_IPP114_PB_CB_vivax_8_odd.raw	tr|A5K858|A5K858_PLAVS 40S ribosomal protein S6 putative OS=Plasmodium vivax (strain Salvador I) OX=126793 GN=PVX_083000 PE=4 SV=1			PEAKS DB
GPP(+31.99)GPMGPPG	21.52	894.39	10	0.2	448.203	2	29.46	86900	29	907390	F29:10665	No	FL1189_IPP114_PB_CB_vivax_6_even.raw	sp|P02452|CO1A1_HUMAN Collagen alpha-1(I) chain OS=Homo sapiens OX=9606 GN=COL1A1 PE=1 SV=5	Dihydroxy	P3:Dihydroxy:0.00	PEAKS PTM
GPPGP(+31.99)MGPPG	24.88	894.39	10	-0.3	448.202	2	29.42	104000	31	992921	F31:10619	No	FL1189b_IPP114_PB_CB_vivax_6_even.raw	sp|P02452|CO1A1_HUMAN Collagen alpha-1(I) chain OS=Homo sapiens OX=9606 GN=COL1A1 PE=1 SV=5	Dihydroxy	P5:Dihydroxy:0.00	PEAKS PTM
GPPPPPPGKPQ	16.54	1067.58	11	-0.8	534.795	2	26.55		30	926766	F30:9619	No	FL1189_IPP114_PB_CB_vivax_6_odd.raw	sp|P02810|PRPC_HUMAN Salivary acidic proline-rich phosphoprotein 1/2 OS=Homo sapiens OX=9606 GN=PRH1 PE=1 SV=2			PEAKS DB
GPPPPPPPP	16.05	851.454	9	1.3	426.735	2	33.68	106000	7	797371	F7:12847	No	FL1029_IPP114_PB_CB_vivax_4_even.raw	sp|O00401|WASL_HUMAN Neural Wiskott-Aldrich syndrome protein OS=Homo sapiens OX=9606 GN=WASL PE=1 SV=2:sp|Q68DA7|FMN1_HUMAN Formin-1 OS=Homo sapiens OX=9606 GN=FMN1 PE=1 SV=3:sp|Q8TF74|WIPF2_HUMAN WAS/WASL-interacting protein family member 2 OS=Homo sapiens OX=9606 GN=WIPF2 PE=1 SV=1:sp|Q8N8S7|ENAH_HUMAN Protein enabled homolog OS=Homo sapiens OX=9606 GN=ENAH PE=1 SV=2:sp|Q9NYV4|CDK12_HUMAN Cycli…			PEAKS DB
GPPVQFG	15.59	700.354	7	-1.3	351.184	2	36.31		14	887961	F14:13860	No	FL1029_IPP114_PB_CB_vivax_8_odd.raw	sp|P48634|PRC2A_HUMAN Protein PRRC2A OS=Homo sapiens OX=9606 GN=PRRC2A PE=1 SV=3			PEAKS DB
GPRAEEYEFLTPVEEAPK	29.58	2061.01	18	0	688.009	3	43.93	122000	32	1018078	F32:15892	No	FL1189b_IPP114_PB_CB_vivax_6_odd.raw	sp|P52565|GDIR1_HUMAN Rho GDP-dissociation inhibitor 1 OS=Homo sapiens OX=9606 GN=ARHGDIA PE=1 SV=3			PEAKS DB
GPRPEEYEFLTPVEEAPK	38.42	2087.02	18	0.7	696.682	3	44.32	1630000	32	1018209	F32:16015	No	FL1189b_IPP114_PB_CB_vivax_6_odd.raw	sp|P52566|GDIR2_HUMAN Rho GDP-dissociation inhibitor 2 OS=Homo sapiens OX=9606 GN=ARHGDIB PE=1 SV=3			PEAKS DB
GPSTPKSPGASNFS	16.68	1332.63	14	0.7	667.323	2	27.83	894000	31	992387	F31:10051	No	FL1189b_IPP114_PB_CB_vivax_6_even.raw	sp|Q9Y4E8|UBP15_HUMAN Ubiquitin carboxyl-terminal hydrolase 15 OS=Homo sapiens OX=9606 GN=USP15 PE=1 SV=3			PEAKS DB
[truncated: 2,331 more rows]

## Sheet: P. vivax peptides sample 24
Peptide	-10lgP	Mass	Length	ppm	m/z	Z	RT	Intensity	Fraction	Id	Scan	from Chimera	Source File	Accession	PTM	AScore	Found By
[truncated: 23 more rows]

## Sheet: P. vivax peptides sample 26
Peptide	-10lgP	Mass	Length	ppm	m/z	Z	RT	Intensity	Fraction	Id	Scan	from Chimera	Source File	Accession	PTM	AScore	Found By
[truncated: 163 more rows]

## Sheet: P. vivax peptides sample 28
Peptide	-10lgP	Mass	Length	ppm	m/z	Z	RT	Intensity	Fraction	Id	Scan	from Chimera	Source File	Accession	PTM	AScore	Found By
[truncated: 60 more rows]

[truncated: 6 more sheets: P. vivax peptides sample 30, P. vivax peptides sample 31, P. vivax peptides sample 34, P. vivax peptides sample 35, All proteins, Peptide frequency]
