# Supplementary material for: Identification of cross-stage, cross-species malaria CD8+ T cell antigens
Source: Research Square preprint supplement (doi:10.21203/rs.3.rs-6682089/v1), 2025-05-30
Supplement: Supplementary file 3 [file 4f7faa3637b805b08bfdcfdd.xlsx]

## Sheet: Synthesized peptides
Number/ID	Elispot ID	Uniprot ID	Protein	Sequence	n	Human homology- Protein name	Human homology- Protein ID	Protein Identity
1	ETRAMP- 1	A5KBH5	Early transcribed membrane protein (ETRAMP)	KKVAAGYKKLTD	12	No significant similarity found
2	ETRAMP- 2	A5KBH5	Early transcribed membrane protein (ETRAMP)	GLNQKQPTKGSNIQ	14	No significant similarity found
3	ETRAMP- 3	A5KBH5	Early transcribed membrane protein (ETRAMP)	LNQKQPTKGSNIQ	13	No significant similarity found	-	-
4	60S L4/L1- 1	A5KAZ9	60S ribosomal subunit protein L4/L1	ANKALLPTAGDD	12	ribosomal protein L4	AAA60281.2	0.5324
5	40S S25- 1	A5K124	40S ribosomal protein S25	GKGKNKEKL	9	40S ribosomal protein S25 [Homo sapiens]	NP_001019.1	0.4177
6	ETRAMP- 5	A5K676	Early transcribed membrane protein (ETRAMP)	KSAGADSKSLKKLD	14	No significant similarity found	-	-
7	ETRAMP- 6	A5K676	Early transcribed membrane protein (ETRAMP)	TPIITNKPFG	10	No significant similarity found
8	Hist. H2A- 5	A5K7L8	Histone H2A	KVPVPPTQAKKPKKN	15	Chain C, Histone H2a.v	3WAA_C	0.8067
9	Ubqt/ribos- 1	A5K2R4	Ubiquitin/ribosomal	AIEPSLAQLAQK	12	ubiquitin-60S ribosomal protein L40 isoform 2	NP_001307950.1	0.8359
10	40S S2	A5K3U1	40S ribosomal protein S2	LETYQNMKIQKQTP	14	hCG2016250, isoform CRA_i	EAW98134.1	0.6873
11	60S L9	A5K306	60S ribosomal protein L9	VSEVTTVEKDE	11	ribosomal protein L9	AAB01040.1	0.5185
12	60S L30	A5KCD7	60S ribosomal protein L30	VITDVGDSDIIKTNE	15	60S ribosomal protein L30	NP_000980.1	0.6095
13	40S S23	A5KB86	40S ribosomal protein S23	SSHAKGIVVEKV	12	40S ribosomal protein S23	NP_001016.1	0.7887
14	40S S30- 1	A5KBT5	40S ribosomal protein S30	SDGTGRKKGPNSKL	14	ubiquitin-like protein fubi and ribosomal protein S30 precursor	EAW66547.1	0.6427
15	40S S30- 2	A5KBT5	40S ribosomal protein S30	GTGRKKGPNSKL	12	ubiquitin-like protein fubi and ribosomal protein S30 precursor	EAW66547.1	0.6427
16	40S S30- 3	A5KBT5	40S ribosomal protein S30	TGRKKGPNSKL	11	ubiquitin-like protein fubi and ribosomal protein S30 precursor	EAW66547.1	0.6427
17	60S L29	A5K3F2	60S ribosomal protein L29	PKFFKNQRY	9	ribosomal protein L29	EAW65182.1	0.6304
18	40S S11	A5K7Q0	40S ribosomal protein S11	SFFNSKKIKKGSKS	14	40S ribosomal protein S11	NP_001006.1	0.6438
19	40S S6- 1	A5K858	40S ribosomal protein S6	SKNGKNRFIKPKIQ	14	Ribosomal protein S6	AAH27620.1	0.5422
20	40S S6- 2	A5K858	40S ribosomal protein S6	GVKKDVAK	8	Ribosomal protein S6	AAH27620.1	0.5422
21	40S S8- 1	A5K1E3	40S ribosomal protein S8	RLTGGKKKIHKKK	13	40S ribosomal protein S8	NP_001003.1	0.5591
22	60S L13- 1	A5JZN9	60S ribosomal protein L13	YESIEVSKID	10	60S ribosomal protein L13 isoform 1	NP_000968.2	0.3318
23	60S 13a	A5K762	60S ribosomal protein L13a	MYKKVYVID	9	60S ribosomal protein L13a isoform 1	NP_036555.1	0.5568
24	60S L31	A5KAW8	60S ribosomal protein L31	AKAVKKQKKTLKPV	14	unnamed protein product	BAH12514.1	0.58
25	60S L32-1	A5K6B0	60S ribosomal protein L32	AVKKVGKIVKKRT	13	60S ribosomal protein L32	NP_000985.1	0.6098
26	A5KC18.1	Unch A5KC18.1	Uncharacterized protein	RKKPATPKKQATPK	14	KIAA1305 protein	BAA92543.2	0.3125
27	A5KC18.2	Unch A5KC18.2	Uncharacterized protein	AQKKPAAPETSA	12	KIAA1305 protein	BAA92543.2	0.3125
28	A5K3E2	50S S28e	50S ribosomal protein S28e	GDTELSGRFL	10	40S ribosomal protein S28	NP_001022.1	0.7143
29	Hist. H3	A5K1U7	Histone H3	APISAGIKKPHR	12	Chain A, Histone H3.2	3AV1_A	92,65%
30	Unch A5K8J8	A5K8J8	Uncharacterized protein	LILRAAIKTK	10	hCG2016457, isoform CRA_a	EAW98276.1	0.3137
31	60S L10	A5K186	60S ribosomal protein L10	GAFGKPNGV	9	60S ribosomal protein L10 isoform a	NP_001290553.1	0.7115
32	60S L35	A5K4R0	60S ribosomal protein L35	KKYKNKKFKPY	11	RPL35 protein	AAH10919.1	0.5126
33	Don Juan	A5K197	Sperm-specific protein Don juan	AQKIKKKKKLTPA	13	unnamed protein product	BAG58641.1	0.3284
34	Unch A5JZN7.1	A5JZN7	Uncharacterized protein	DNNEHVVQEKTVSF	14	ribonuclease P protein subunit p25-like protein	NP_680544.1	0.3391
35	Unch A5JZN7.2	A5JZN7	Uncharacterized protein	DNNEHVVQEKTV	12	ribonuclease P protein subunit p25-like protein	NP_680544.1	0.3391
36	Unch A5K8G9	A5K8G9	Uncharacterized protein	EDYSPRKV	8	No significant similarity found
37	Hist. H2A- 1	A5K214	Histone H2A	GRIGRYLKKGKYAK	14	histone H2AX	NP_002096.1	0.7287
38	Hist. H2A- 2	A5K214	Histone H2A	ASGGVLPNIHNV	12	histone H2AX	NP_002096.1	0.7287
39	Hist. H2A- 3	A5K214	Histone H2A	SGGVLPNIHNV	11	histone H2AX	NP_002096.1	0.7287
40	Hist. H2A- 4	A5K214	Histone H2A	GRIGRYLKKGKYA	13	histone H2AX	NP_002096.1	0.7287
41	A5KBH5.4	ETRAMP- 4	Early transcribed membrane protein (ETRAMP)	LGGLNQKQPT	14	No significant similarity found
42	60S L4/L1- 2	A5KAZ9	60S ribosomal subunit protein L4/L1	NKALLPTAGDD	11	ribosomal protein L4	AAA60281.2	0.5324
43	60S L4/L1- 3	A5KAZ9	60S ribosomal subunit protein L4/L1	YGRIFKKKITKK	12	ribosomal protein L4	AAA60281.2	0.5324
44	40S S25- 2	A5K124	40S ribosomal protein S25	GKGKNKEKLNHAVF	14	40S ribosomal protein S25 [Homo sapiens]	NP_001019.1	0.4177
45	Ubqt/ribos- 2	A5K2R4	Ubiquitin/ribosomal	NQLRPKKKLK	10	ubiquitin-60S ribosomal protein L40 isoform 2	NP_001307950.1	0.8359
46	40S S6- 3	A5K858	40S ribosomal protein S6	GPKRATKIRK	10	Ribosomal protein S6	AAH27620.1	0.5422
47	40S S8- 2	A5K1E3	40S ribosomal protein S8	GSKQVHVV	8	40S ribosomal protein S8	NP_001003.1	0.5591
48	60S L13- 2	A5JZN9	60S ribosomal protein L13	GTPIEKLHPI	10	60S ribosomal protein L13 isoform 1	NP_000968.2	0.3318
49	60S L13- 3	A5JZN9	60S ribosomal protein L13	KNIKSKNGIGGIPAD	15	60S ribosomal protein L13 isoform 1	NP_000968.2	0.3318
50	60S L32-2	A5K6B0	60S ribosomal protein L32	AVKKVGKIVK	10	60S ribosomal protein L32	NP_000985.1	0.6098

## Sheet: 1 peptide of each 29 protein
Number/ID	New ID	Protein	Sequence	n
2	A5KBH5.2	Early transcribed membrane protein (ETRAMP)	GLNQKQPTKGSNIQ	14
4	A5KAZ9.1	60S ribosomal subunit protein L4/L1	ANKALLPTAGDD	12
44	A5K124.2	40S ribosomal protein S25	GKGKNKEKLNHAVF	14
7	A5K676.2	Early transcribed membrane protein (ETRAMP)	TPIITNKPFG	10
8	A5K7L8	Histone H2A	KVPVPPTQAKKPKKN	15
9	A5K2R4.1	Ubiquitin/ribosomal	AIEPSLAQLAQK	12
10	A5K3U1	40S ribosomal protein S2	LETYQNMKIQKQTP	14
11	A5K306	60S ribosomal protein L9	VSEVTTVEKDE	11
12	A5KCD7	60S ribosomal protein L30	VITDVGDSDIIKTNE	15
13	A5KB86	40S ribosomal protein S23	SSHAKGIVVEKV	12
14	A5KBT5.1	40S ribosomal protein S30	SDGTGRKKGPNSKL	14
17	A5K3F2	60S ribosomal protein L29	PKFFKNQRY	9
18	A5K7Q0	40S ribosomal protein S11	SFFNSKKIKKGSKS	14
19	A5K858.1	40S ribosomal protein S6	SKNGKNRFIKPKIQ	14
21	A5K1E3.1	40S ribosomal protein S8	RLTGGKKKIHKKK	13
22	A5JZN9.1	60S ribosomal protein L13	YESIEVSKID	10
23	A5K762	60S ribosomal protein L13a	MYKKVYVID	9
24	A5KAW8	60S ribosomal protein L31	AKAVKKQKKTLKPV	14
25	A5K6B0.1	60S ribosomal protein L32	AVKKVGKIVKKRT	13
26	A5KC18.1	Uncharacterized protein	RKKPATPKKQATPK	14
28	A5K3E2	50S ribosomal protein S28e	GDTELSGRFL	10
29	A5K1U7	Histone H3	APISAGIKKPHR	12
30	A5K8J8	Uncharacterized protein	LILRAAIKTK	10
31	A5K186	60S ribosomal protein L10	GAFGKPNGV	9
32	A5K4R0	60S ribosomal protein L35	KKYKNKKFKPY	11
33	A5K197	Sperm-specific protein Don juan	AQKIKKKKKLTPA	13
34	A5JZN7.1	Uncharacterized protein	DNNEHVVQEKTVSF	14
36	A5K8G9	Uncharacterized protein	EDYSPRKV	8
38	A5K214.2	Histone H2A	ASGGVLPNIHNV	12

## Sheet: Pool Histone
Number/ID	New ID	Protein	Sequence	n
37	A5K214.1	Histone H2A	GRIGRYLKKGKYAK	14
38	A5K214.2	Histone H2A	ASGGVLPNIHNV	12
39	A5K214.3	Histone H2A	SGGVLPNIHNV	11
40	A5K214.4	Histone H2A	GRIGRYLKKGKYA	13
29	A5K1U7	Histone H3	APISAGIKKPHR	12

## Sheet: Pool 40S ribosomal
Number/ID	New ID	Protein	Sequence	n
18	A5K7Q0	40S ribosomal protein S11	SFFNSKKIKKGSKS	14
10	A5K3U1	40S ribosomal protein S2	LETYQNMKIQKQTP	14
13	A5KB86	40S ribosomal protein S23	SSHAKGIVVEKV	12
5	A5K124.1	40S ribosomal protein S25	GKGKNKEKL	9
44	A5K124.2	40S ribosomal protein S25	GKGKNKEKLNHAVF	14
14	A5KBT5.1	40S ribosomal protein S30	SDGTGRKKGPNSKL	14
15	A5KBT5.2	40S ribosomal protein S30	GTGRKKGPNSKL	12
16	A5KBT5.3	40S ribosomal protein S30	TGRKKGPNSKL	11
19	A5K858.1	40S ribosomal protein S6	SKNGKNRFIKPKIQ	14
20	A5K858.2	40S ribosomal protein S6	GVKKDVAK	8
46	A5K858.3	40S ribosomal protein S6	GPKRATKIRK	10
21	A5K1E3.1	40S ribosomal protein S8	RLTGGKKKIHKKK	13
47	A5K1E3.2	40S ribosomal protein S8	GSKQVHVV	8

## Sheet: Pool 60S ribosomal
Number/ID	New ID	Protein	Sequence	n
31	A5K186	60S ribosomal protein L10	GAFGKPNGV	9
22	A5JZN9.1	60S ribosomal protein L13	YESIEVSKID	10
48	A5JZN9.2	60S ribosomal protein L13	GTPIEKLHPI	10
49	A5JZN9.3	60S ribosomal protein L13	KNIKSKNGIGGIPAD	15
23	A5K762	60S ribosomal protein L13a	MYKKVYVID	9
17	A5K3F2	60S ribosomal protein L29	PKFFKNQRY	9
12	A5KCD7	60S ribosomal protein L30	VITDVGDSDIIKTNE	15
24	A5KAW8	60S ribosomal protein L31	AKAVKKQKKTLKPV	14
25	A5K6B0.1	60S ribosomal protein L32	AVKKVGKIVKKRT	13
50	A5K6B0.2	60S ribosomal protein L32	AVKKVGKIVK	10
32	A5K4R0	60S ribosomal protein L35	KKYKNKKFKPY	11
11	A5K306	60S ribosomal protein L9	VSEVTTVEKDE	11
4	A5KAZ9.1	60S ribosomal subunit protein L4/L1	ANKALLPTAGDD	12
42	A5KAZ9.2	60S ribosomal subunit protein L4/L1	NKALLPTAGDD	11
43	A5KAZ9.3	60S ribosomal subunit protein L4/L1	YGRIFKKKITKK	12

## Sheet: Pool ETRAMP
Number/ID	New ID	Protein	Sequence	n
1	A5KBH5.1	Early transcribed membrane protein (ETRAMP)	KKVAAGYKKLTD	12
2	A5KBH5.2	Early transcribed membrane protein (ETRAMP)	GLNQKQPTKGSNIQ	14
3	A5KBH5.3	Early transcribed membrane protein (ETRAMP)	LNQKQPTKGSNIQ	13
6	A5K676.1	Early transcribed membrane protein (ETRAMP)	KSAGADSKSLKKLD	14
7	A5K676.2	Early transcribed membrane protein (ETRAMP)	TPIITNKPFG	10

## Sheet: Pool remaining proteins
26	A5KC18.1	Uncharacterized protein	RKKPATPKKQATPK	14
27	A5KC18.2	Uncharacterized protein	AQKKPAAPETSA	12
28	A5K3E2	50S ribosomal protein S28e	GDTELSGRFL	10
30	A5K8J8	Uncharacterized protein	LILRAAIKTK	10
33	A5K197	Sperm-specific protein Don juan	AQKIKKKKKLTPA	13
34	A5JZN7.1	Uncharacterized protein	DNNEHVVQEKTVSF	14
35	A5JZN7.2	Uncharacterized protein	DNNEHVVQEKTV	12
36	A5K8G9	Uncharacterized protein	EDYSPRKV	8

## Sheet: Pool-9
Number/ID	Elispot ID	Uniprot ID	Protein	Sequence	n
1	ETRAMP- 1	A5KBH5	Early transcribed membrane protein (ETRAMP)	KKVAAGYKKLTD	12
4	60S L4/L1- 1	A5KAZ9	60S ribosomal subunit protein L4/L1	ANKALLPTAGDD	12
7	ETRAMP- 6	A5K676	Early transcribed membrane protein (ETRAMP)	TPIITNKPFG	10
20	40S S6- 2	A5K858	40S ribosomal protein S6	GVKKDVAK	8
27	A5KC18.2	Unch A5KC18.2	Uncharacterized protein	AQKKPAAPETSA	12
31	60S L10	A5K186	60S ribosomal protein L10	GAFGKPNGV	9
32	60S L35	A5K4R0	60S ribosomal protein L35	KKYKNKKFKPY	11
33	Don Juan	A5K197	Sperm-specific protein Don juan	AQKIKKKKKLTPA	13
37	Hist. H2A- 1	A5K214	Histone H2A	GRIGRYLKKGKYAK	14

## Sheet: All ribosomal
Number/ID	New ID	Protein	Sequence	n
18	A5K7Q0	40S ribosomal protein S11	SFFNSKKIKKGSKS	14
10	A5K3U1	40S ribosomal protein S2	LETYQNMKIQKQTP	14
13	A5KB86	40S ribosomal protein S23	SSHAKGIVVEKV	12
5	A5K124.1	40S ribosomal protein S25	GKGKNKEKL	9
44	A5K124.2	40S ribosomal protein S25	GKGKNKEKLNHAVF	14
14	A5KBT5.1	40S ribosomal protein S30	SDGTGRKKGPNSKL	14
15	A5KBT5.2	40S ribosomal protein S30	GTGRKKGPNSKL	12
16	A5KBT5.3	40S ribosomal protein S30	TGRKKGPNSKL	11
19	A5K858.1	40S ribosomal protein S6	SKNGKNRFIKPKIQ	14
20	A5K858.2	40S ribosomal protein S6	GVKKDVAK	8
46	A5K858.3	40S ribosomal protein S6	GPKRATKIRK	10
21	A5K1E3.1	40S ribosomal protein S8	RLTGGKKKIHKKK	13
47	A5K1E3.2	40S ribosomal protein S8	GSKQVHVV	8
28	A5K3E2	50S ribosomal protein S28e	GDTELSGRFL	10
31	A5K186	60S ribosomal protein L10	GAFGKPNGV	9
22	A5JZN9.1	60S ribosomal protein L13	YESIEVSKID	10
48	A5JZN9.2	60S ribosomal protein L13	GTPIEKLHPI	10
49	A5JZN9.3	60S ribosomal protein L13	KNIKSKNGIGGIPAD	15
23	A5K762	60S ribosomal protein L13a	MYKKVYVID	9
17	A5K3F2	60S ribosomal protein L29	PKFFKNQRY	9
12	A5KCD7	60S ribosomal protein L30	VITDVGDSDIIKTNE	15
24	A5KAW8	60S ribosomal protein L31	AKAVKKQKKTLKPV	14
25	A5K6B0.1	60S ribosomal protein L32	AVKKVGKIVKKRT	13
50	A5K6B0.2	60S ribosomal protein L32	AVKKVGKIVK	10
32	A5K4R0	60S ribosomal protein L35	KKYKNKKFKPY	11
11	A5K306	60S ribosomal protein L9	VSEVTTVEKDE	11
4	A5KAZ9.1	60S ribosomal subunit protein L4/L1	ANKALLPTAGDD	12
42	A5KAZ9.2	60S ribosomal subunit protein L4/L1	NKALLPTAGDD	11
43	A5KAZ9.3	60S ribosomal subunit protein L4/L1	YGRIFKKKITKK	12
9	A5K2R4.1	Ubiquitin/ribosomal	AIEPSLAQLAQK	12
45	A5K2R4.2	Ubiquitin/ribosomal	NQLRPKKKLK	10
