# Supplementary material for: Identification of cross-stage, cross-species malaria CD8+ T cell antigens
Source: Research Square preprint supplement (doi:10.21203/rs.3.rs-6682089/v1), 2025-05-30
Supplement: Supplementary file 4 [file f627414ee30461a289be443a.xlsx]

## Sheet: Pv
ID	Gender	Body temperature	Malaria episodes			Symptoms			Hematological data
			1	<5	≥5	Myalgia	Headache	Chill	Parasitemia (cross)	Hemoglobin g/dL	Hematocrit %	RBCs x106/mm3	Leucocytes x103/mm3	Platelets x103/mm3	Creatinine mg/dL	AST U/L	ALT U/L
M32	M	NA	NA	NA	NA	NA	NA	NA	3	15.6	49.9	6.1	6.53	186	0.87	21	23
M34	M	NA	NA	NA	NA	NA	NA	NA	3	NA	NA	NA	NA	NA	NA	NA	NA
M37	M	NA	NA	NA	NA	NA	NA	NA	3	NA	NA	NA	NA	NA	NA	NA	NA
M48	M	38.0 °C	NA	NA	NA	yes	yes	yes	2	NA	NA	NA	NA	NA	NA	NA	NA
M50	M	-	X			no	yes	yes	2	15	48	5.66	10.2	298	1.09	36	36
M56	M	39.3 °C		X		yes	yes	yes	2	NA	NA	NA	NA	NA	NA	NA	NA
M64	NA	NA	NA	NA	NA	NA	NA	NA	3	NA	NA	NA	NA	NA	NA	NA	NA
M68	M	35.5 °C	X			yes	yes	yes	2	15	45.1	5	3.7	158	1.17	48	47
M88	M	34.8 °C			X	yes	no	no	2	14.7	42.7	4.72	4.73	157		18	32
M89	F	36.0 °C	X			yes	yes	yes	3	11.6	35.3	4.04	6.3	157	0.65	24	26
M90	M	37.1 °C	X			yes	yes	yes	2	15.8	47.5	5.28	6	191	1.02	19	38
M91	F	37.0 °C	X			yes	yes	yes	6 forms	13.9	41.6	4.82	4.62	159	0.7	32	13
M92	F	36.3 °C		X		yes	yes	yes	0.5	14	39.9	4.82	4.86	171	0.61	14	13
M93	M	36.5 °C		X		no	yes	yes	2	12.9	38.9	4.68	2.84	138	0.94	21	14
M94	M	38.9 °C			X	yes	yes	yes	1	13.6	40.6	4.85	4.03	154	0.73	24	26
M95	M	38.3 °C		X		yes	yes	no	1	15.4	45.8	4.83	4.8	161	1.29	29	20
M96	M	36.6 °C		X		yes	yes	yes	5 forms	15.6	46.8	5.21	1.6	82	1.07	36	43.4
M97	F	36.6 °C			X	yes	yes	yes	10 forms	15	42.4	4.74	2.8	158	0.88	31	43.5
M98	M	35.3 °C		X		yes	yes	yes	2	14.5	42	4.91	2.76	161	0.98	24	31
M99	M	37.8 °C			X	yes	yes	no	1	15.1	43.2	5.21	4.87	158	1	-	-
M100	M	37.9 °C		X		yes	no	yes	1	15.5	43.7	5.27	3.42	154	1.09	24	18
M101	F	34.6 °C	X			yes	yes	yes	2	11.5	33.6	3.74	3.62	76	0.59	34	17
M102	M	37.7 °C		X		yes	yes	yes	2	15.2	43.3	4.93	11.14	167	0.94	19	33
M103	M	36.7 °C			X	yes	yes	yes	1	13.8	40.2	4.5	3.32	169	0.68	59	68
M104	M	36.7 °C	X			yes	yes	yes	8 forms	16.9	49.9	5.84	3.23	157	1.17	35	55
M105	M	35.6 °C			X	no	yes	no	2	14	40.1	4.74	4.16	167	0.76	25	37
M106	M	35.9 °C			X	yes	yes	yes	1	14.2	38.3	4.45	5.35	151	1.08	18	16
M107	M	38.5 °C		X		yes	yes	yes	2	14.8	41.6	5.06	5.89	92	1.19	31	17
M108	M	35.8 °C			X	yes	yes	yes	2	13.5	42.1	5.86	7.62	112	0.78	25	11
M110	F	38.1 °c	X			yes	yes	yes	2	10.3	32	3.29	2.45	102	1.36	41	33
M111	M	34.7 °c			X	yes	yes	yes	1	12.9	38.6	4.4	6.5	156	0.94	23	26
M112	M	36.2 °c		X		yes	yes	yes	2	12.4	37.9	4.4	3.45	188	0.64	19	20
M113	M	35.9 °c		X		yes	yes	yes	2	14.5	43.8	4.76	4.59	174	0.87	18	23
M114	F	35.9 °c			X	yes	yes	yes	2	12.5	36.7	4.15	3.87	76	NA	20	18
M115	F	36.6 °c		X		yes	yes	yes	2	12.8	38.2	4.05	5.53	77	0.99	36	26
M116	NA	36.7 °c				yes	yes	yes	NA	NA	NA	NA	NA	NA	NA	NA	NA
M117	M	36.1 °c		X		yes	yes	yes	2	13.9	41.8	4.77	6.39	113	1.32	25	16
M118	M	36.5 °c		X		yes	yes	yes	2	13.7	43.2	4.59	4.16	35	0.71	17	24
M119	F	35.6 °c		X		yes	yes	yes	1	12.6	38.3	4.19	4.26	164	0.76	40	37
M120	M	36.0 °c		X		yes	yes	yes	1	14.3	43.7	5.09	5.11	244	0.8	28	45
M121	M	39.1 °c		X		yes	yes	yes	2	13.4	38.8	4.45	3.85	135	0.86	13	13
M: Male; F: Female; NA: Non-Avaliable PF: Plasmodium falciparum
ID	Gender	Body temperature	Malaria episodes			Symptoms			Hematological data
			1	<5	≥5	Myalgia	Headache	Chill	Parasitemia (cross)	Hemoglobin g/dL	Hematocrit %	RBCs x106/mm3	Leucocytes x103/mm3	Platelets x103/mm3	Creatinine mg/dL	AST U/L	ALT U/L
1V175	m	36.3		2		no	yes	yes		12.5	37.20	4.17	8380	223	1.08	30	23
1V174	m	35.8		2		yes	yes	yes		13.60	41	4.69	6330	131	1.25	23	22
1V179	f	36.9		2		yes	yes	yes		13.8	41.2	5.12	7160	124	0.91	46	60
1V172	f	35.7		2		yes	yes	yes		11.8	35.9	4.20	5380	104	0.84	24	57
1V173	m	36.1		4		yes	yes	yes		14.7	44.30	5.11	7520	113	1.19	19	13
1V175	m	36.3		2		no	yes	yes		12.5	37.20	4.17	8380	223	1.08	30	23
1V200	m	35.6			10	yes	yes	yes		10.80	30.90	3.62	6170	55.6	0.87	23	11
1V201	m	36.3			30	yes	yes	yes		12.20	32.70	3.26	5820	122	1.16	27	24
1V223	m	36.7		4		yes	yes	yes		12.70	37.10	4.48	4910	135	0.98	26	26
1V224	m	36.1		3		no	no	no		12.60	38.90	4.83	4250	185	0.93	15	18
1V226	m	36.5		2		yes	yes	yes		12.80	39.50	4.43	5330	33	1.05	36	26
1V235	m	37.7			6	yes	yes	yes		13.60	39.30	4.52	3360	100	0.90	18	16
1V241	m	35.8			5	yes	yes	yes		15.10	45	5.13	8480	83	1.10	30	91
1V242	m	36.2		12		yes	yes	yes		14.80	46.50	5.20	9570	201	1.25	21	28

## Sheet: Pv-ASY
ID	Gender	Body temperature	Malaria episodes			Symptoms			Hematological data
			1	<5	≥5	Myalgia	Headache	Chill	Parasitemia (cross)	Hemoglobin g/dL	Hematocrit %	RBCs x106/mm3	Leucocytes x103/mm3	Platelets x103/mm3	Creatinine mg/dL	AST U/L	ALT U/L
1V196	f	35.9		2		no	no	no		12.3	37.3	5.08	8.08	297	0.62	21	36
1V197	m	36.7			20	no	no	no		14.70	0	0	0	0	0.86	28	28
1V198	m	35.5		0		no	no	no		15.50	42.60	4.74	7.1	254	1.02	10	8
1V199	#N/A	#N/A		#N/A		#N/A	#N/A	#N/A		#N/A	#N/A	#N/A	#N/A	#N/A	#N/A	#N/A	#N/A
1V204	m	35.7			10	no	no	no		14.60	40.50	4.30	8.22	299	0.99	19	26
1V205	f	35.5	1			no	no	no		12.30	37.20	4.27	4.3	161	0.64	27	29
1V206	m	35.6			10	no	no	no		15.10	46.90	5.57	7.18	271	0.87	15	20
1V207	m	35.3			7	no	no	no		13.90	43.10	4.94	6.34	305	0.82	20	22
1V208	f	36.6		4		no	no	no		13.50	40.40	4.54	6.36	298	0.61	10	11
1V213	f	37.0			9	no	no	yes		12.10	37.70	4.89	8.51	305	0.80	15	25
1V214	f	36.4			5	no	no	no		12.50	36.60	4.65	8.05	193	0.96	19	28
1V215	f	36.5			15	no	yes	no		10.50	32.20	4.19	6.2	188	0.83	16	7
1V216	f	36.8			5	no	no	no		13.10	39.10	4.99	7.32	227	0.75	32	43
1V217	f	36.5		2		no	yes	no		11.50	34.80	4	7.21	186	0.82	13	11
1V219	m	35.6	0			no	no	no		13.90	39.70	4.48	4.77	255	0.99	21	17
1V220	m	36.2			6	no	no	no		15.30	45	4.89	4.27	180	0.88	30	41
1V221	f	35.3			5	no	no	no		13.30	38.60	4.54	6.08	206	0.83	21	24
1V222	f	36.3	1			no	no	no		13.30	36.40	4.63	10.41	290	0.74	13	21
1V225	m	36.2			15	no	no	no		#N/A	#N/A	#N/A	#N/A	#N/A	#N/A	#N/A	#N/A
1V227	f	36.6		3		no	no	no		13	40.90	4.33	10.18	292	0.83	11	8
1V228	m	36.2		3		no	no	no		15	47.20	5.09	4.74	212	0.98	17	17
1V229	f	36.8	0			no	no	no		13.60	41.80	4.33	6.41	291	0.76	11	9
1V232	m	35.8			15	no	yes	no		16	45.60	4.90	5.43	197	0.80	20	21
1V233	f	36.5	0			no	no	no		13.5	40.6	4.61	3.82	315	0.87	26	33
1V234	m	35.2			27	no	no	no		14.30	44.10	4.65	6.57	213	0.92	24	19
1V243	f	36.2		2		no	no	no		13.40	39.60	4.61	3.61	171	0.59	16	18
1V244	m	36.0			5	no	no	no		13.60	44.30	5.79	9.77	403	0.83	22	13
1V245	m	35.7			10	no	no	no		14.30	41.70	4.95	6.86	224	0.99	18	8
1V246	f	35.6		2		no	no	no		10.80	31.20	3.72	6.93	373	0.61	15	41

## Sheet: Pf
ID	Gender	Body temperature	Malaria episodes			Symptoms			Hematological data
			1	<5	≥5	Myalgia	Headache	Chill	Parasitemia (cross)	Hemoglobin g/dL	Hematocrit %	RBCs x106/mm3	Leucocytes x103/mm3	Platelets x103/mm3	Creatinine mg/dL	AST U/L	ALT U/L
PF6	M				X				10 forms	13.8	42.3	4.73	2.32	167	1.21	22	15
PF7	M		X						1	13.9	43.2	5.18	5.01	186	1.24	15	22
PF8	M				X				0,5	10.6	31.4	3.46	5.26	157	1.17	13	10
PF9	M				X				1	14	43.7	4.92	5.49	246		14	27
PF10	M				X				1	14.1	42.2	4.5	3.03	147	0.76	19	11
PF11	M				X				2	11.5	35.7	3.9	4.79	109	0.84	41	39
PF12	M				X				0.5	15	44.8	5.28	3.62	148	0.91	20	12
PF13	M				X				2	13.8	42	4.78	7.59	181	0.86	24	57

## Sheet: HD
ID	Gender	Previous malaria episodes	Number of previous malaria episodes			Which		Hematological data
			1	>1<5	≥6	vivax	falciparum	Hemoglobin g/dL	Hematocrit %	RBCs x106/mm3	Leucocytes x103/mm3	Platelets x103/mm3	Creatinine mg/dL	AST U/L	ALT U/L
CE01	M	Yes	-	-	x	x	x	14,9	42,40	4.99	2.95	158	1.19	36	48
CE02	M	Yes	-	x	-	x	x	14,20	42,10	4,94	6.07	152	1.07	18	17
CE04	M	Yes	-	x	-	x	x	15,40	43,80	4,95	6	194	1	24	36
CE05	M	Yes	x	-	-	NA		14.8	44,20	87,70	2.67	153	0.84	50	72
CE06	M	No	-	-	-	-	-	15,50	45,2	5,15	7	161	0.83	27	69
CE07	M	Yes	-	x	-	x	x	13,40	40,70	4,77	8	167	0.73	22	17
CE10	M	NA	NA	NA	NA	NA	NA	14,90	45,30	5,43	8.41	345	0.92	22	35
CE11	M	Yes	-	x	-	x	x	15,40	45,10	4,98	10	312	1.02	37	45
CE13	M	NA	NA	NA	NA	NA	NA	14,10	40,60	4,80	4.65	124	0.93	26	21
CE14	M	No	-	-	-	-	-	12,7	36,10	4,13	4	170	NA	NA	NA
CE15	M	Yes		x		x		14,1	42,10	4,95	5.89	253	0,98	24	18
CE16	M	Yes		x		x	x	14,60	45	4.9	8.28	289	0.98	22	30
CE17	M	Yes		x		x	x	12,60	36,10	4	5.13	162	1.22	30	30
CE18	M	Yes	x	-	-	x	-	13,30	39,40	4,38	8.49	215	0.88	16	17
CE19	F	No	-	-	-	-	-	11,70	36,20	4,37	5.8	276	0,80	21	24
CE30	M	Yes		x		x		17,80	52,90	5,79	6.8	199	1,12	15	22
CE31	F	Yes	x	-	-	x		13,30	39,20	4,6	7.65	256	0.61	14	17
CE32	F	No	-	-	-	-	-	13,10	41,30	4,25	4	351	0.8	21	13
CE33	F	No	-	-	-	-	-	13,10	39,50	4,72	7,53	247	0.83	16	12
CE34	F	No	-	-	-	-	-	12,80	38,60	4,77	6,33	388	0.75	12	9
CE35	F	Yes	NA	NA	NA	NA	NA	13	37,30	4,14	5.72	219	NA	14	11
CE36	M	Yes	x	-	-	NA	NA	NA	NA	NA	NA	NA	NA	NA	NA
CBH1	F	No	-	-	-	-	-	NA	NA	NA	NA	NA	NA	NA	NA
CBH2	F	No	-	-	-	-	-	NA	NA	NA	NA	NA	NA	NA	NA
CBH3	M	No	-	-	-	-	-	NA	NA	NA	NA	NA	NA	NA	NA
CBH4	M	No	-	-	-	-	-	NA	NA	NA	NA	NA	NA	NA	NA
CBH5	F	No	-	-	-	-	-	NA	NA	NA	NA	NA	NA	NA	NA
CBH6	M	No	-	-	-	-	-	NA	NA	NA	NA	NA	NA	NA	NA
CE: Endemic control; CBH: Non-endemic control; M: Male; F: Female; NA: Non-avaliable.
ID	Gender	Previous malaria episodes	Number of previous malaria episodes			Which		Hematological data
			1	>1<5	≥6	vivax	falciparum	Hemoglobin g/dL	Hematocrit %	RBCs x106/mm3	Leucocytes x103/mm3	Platelets x103/mm3	Creatinine mg/dL	AST U/L	ALT U/L
1C192	#N/A	36.2	1			no	no	no		12.60	39	4.95	13450	487	0.57	35	48
1C191	#N/A	#N/A	0			no	no	no		#N/A	#N/A	#N/A	#N/A	#N/A	#N/A	#N/A	#N/A
1C202	#N/A	#N/A	0			no	no	no		#N/A	#N/A	#N/A	#N/A	#N/A	#N/A	#N/A	#N/A
1C203	#N/A	#N/A	0			no	no	no		#N/A	#N/A	#N/A	#N/A	#N/A	#N/A	#N/A	#N/A
1C211	f	36.4	0			no	no	no		12.4	37.3	4.24	8500	411	0.92	18	26
1C212	#N/A	#N/A	0			no	no	no		#N/A	#N/A	#N/A	#N/A	#N/A	#N/A	#N/A	#N/A
1C218	#N/A	#N/A	0			no	no	no		#N/A	#N/A	#N/A	#N/A	#N/A	#N/A	#N/A	#N/A
1C218	#N/A	#N/A	0			no	no	no		#N/A	#N/A	#N/A	#N/A	#N/A	#N/A	#N/A	#N/A
1C237	0	0	0			no	no	no		12.60	36.60	4.26	5700	316	0.79	17	13
1C238	#N/A	#N/A	0			no	no	no		#N/A	#N/A	#N/A	#N/A	#N/A	#N/A	#N/A	#N/A
1C239	#N/A	#N/A	0			no	no	no		#N/A	#N/A	#N/A	#N/A	#N/A	#N/A	#N/A	#N/A
1C240	#N/A	#N/A	0			no	no	no		#N/A	#N/A	#N/A	#N/A	#N/A	#N/A	#N/A	#N/A
